# Supplementary material
Source: PubMed Central journal article supplement (PMC3881597)

**Application of diazene-directed fragment assembly to the enantioselective total synthesis and stereochemical assignment of (+)-desmethyl-*meso*-chimonanthine and related heterodimeric alkaloids.**

Stephen P. Lathrop and Mohammad Movassaghi\*

*Massachusetts Institute of Technology, Department of Chemistry, Massachusetts 02139*

**Supporting Information**

|                                                                                |     |
|--------------------------------------------------------------------------------|-----|
| General Procedures                                                             | S2  |
| Materials                                                                      | S2  |
| Instrumentation                                                                | S2  |
| Positional Numbering System                                                    | S3  |
| N1-Carboxymethyl Hexahydropyrroloindole (-)- <b>S2</b>                         | S4  |
| C2-Carboxymethyl Hexahydropyrroloindole (+)- <b>13</b>                         | S6  |
| N8-Carboxy- <i>tert</i> -Butyl Hexahydropyrroloindole (-)- <b>14</b>           | S7  |
| Hexahydropyrroloindole Sulfamate Ester (-)- <b>15</b>                          | S9  |
| C3a-Aminohexahydropyrroloindole (-)- <b>16</b>                                 | S11 |
| C2-Carboxymethyl Hexahydropyrroloindole (-)- <b>17</b>                         | S12 |
| N8- <i>tert</i> -Butylbenzenesulfonyl Hexahydropyrroloindole (-)- <b>18</b>    | S14 |
| Hexahydropyrroloindole Sulfamate Ester (-)- <b>19</b>                          | S16 |
| C3a-Aminohexahydropyrroloindole (-)- <b>20</b>                                 | S18 |
| N1-Carboxytrichloroethyl Hexahydropyrroloindole (+)- <b>S4</b>                 | S20 |
| C2-Carboxymethyl Hexahydropyrroloindole (+)- <b>21</b>                         | S22 |
| N8-Benzenesulfonyl Hexahydropyrroloindole (+)- <b>22</b>                       | S24 |
| C3a-Aminohexahydropyrroloindole (+)- <b>24</b>                                 | S26 |
| Mixed Sulfamide (-)- <b>25</b>                                                 | S28 |
| Unsymmetrical Diazene (-)- <b>26</b>                                           | S30 |
| Heterodimer (-)- <b>27</b>                                                     | S32 |
| Mixed Sulfamide (+)- <b>28</b>                                                 | S34 |
| Unsymmetrical Diazene (+)- <b>29</b>                                           | S36 |
| Heterodimer (+)- <b>30</b>                                                     | S38 |
| N8'-H Heterodimer (-)- <b>31</b>                                               | S40 |
| N8'-Methyl Heterodimer (-)- <b>32</b>                                          | S42 |
| (-)-N1,N1'-Carboxymethyl Calycanthidine ( <b>33</b> )                          | S44 |
| (-)-Calycanthidine ( <b>1</b> )                                                | S46 |
| NMR Comparison Tables for (-)-Calycanthidine ( <b>1</b> )                      | S48 |
| N1'-Carboxyethyl Heterodimer (+)- <b>34</b>                                    | S52 |
| (-)-N1-Carboxymethyl-N1'-Carboxyethyl <i>meso</i> -Chimonanthine ( <b>35</b> ) | S54 |
| <i>meso</i> -Chimonanthine ( <b>2</b> )                                        | S56 |
| NMR Comparison Tables for <i>meso</i> -Chimonanthine ( <b>2</b> )              | S58 |
| <i>meso</i> -Calycanthine ( <b>36</b> )                                        | S62 |
| NMR Comparison Tables for <i>meso</i> -Calycanthine ( <b>36</b> )              | S63 |
| (-)-N1-Carboxymethyl-N1'-Desmethyl- <i>meso</i> -Chimonanthine ( <b>37</b> )   | S65 |
| (-)-Desmethyl- <i>meso</i> -Chimonanthine ( <b>3</b> )                         | S67 |
| NMR Comparison Tables for Desmethyl- <i>meso</i> -Chimonanthine ( <b>3</b> )   | S70 |

|                                                                 |     |
|-----------------------------------------------------------------|-----|
| N1'-H Heterodimer (-)- <b>38</b>                                | S73 |
| N1'-Methyl Heterodimer (-)- <b>39</b>                           | S75 |
| (-)-N1'-Carboxymethyl- <i>meso</i> -Chimonanthine ( <b>40</b> ) | S77 |
| (+)-Desmethyl- <i>meso</i> -Chimonanthine ( <b>3</b> )          | S79 |
| Copy of <sup>1</sup> H and <sup>13</sup> C NMR spectra          | S80 |

**General Procedures.** All reactions were performed in oven-dried or flame-dried round-bottom flasks. The flasks were fitted with rubber septa, and reactions were conducted under a positive pressure of argon. Cannulae or gas-tight syringes with stainless steel needles were used to transfer air- or moisture-sensitive liquids. Where necessary (so noted), solutions were deoxygenated by sparging with argon for a minimum of 10 min. Flash column chromatography was performed as described by Still et al.<sup>1</sup> using granular silica gel (60-Å pore size, 40–63 μm, 4–6% H<sub>2</sub>O content, Zeochem). Analytical thin layer chromatography (TLC) was performed using glass plates pre-coated with 0.25 mm 230–400 mesh silica gel impregnated with a fluorescent indicator (254 nm). TLC plates were visualized by exposure to short wave ultraviolet light (254 nm) and irreversibly stained by treatment with an aqueous solution of ceric ammonium molybdate (CAM) followed by heating (~ 1 min) on a hot plate (~ 250 °C). Organic solutions were concentrated at 29–30 °C on rotary evaporators capable of achieving a minimum pressure of ~2 torr. The diazene photolysis was accomplished by irradiation in a Rayonet RMR-200 photochemical reactor (Southern New England Ultraviolet Company, Branford, CT, USA) equipped with 16 lamps.

**Materials.** Commercial reagents and solvents were used as received with the following exceptions: dichloromethane, acetonitrile, tetrahydrofuran, methanol, pyridine, toluene, and triethylamine were purchased from J. T. Baker (Cycletainer<sup>TM</sup>) and were purified by the method of Grubbs *et al.* under positive argon pressure.<sup>2</sup> *N,N'*-diisopropylethylamine and benzene were dried by distillation over calcium hydride under an inert nitrogen atmosphere and used directly. L-tryptophan methyl ester hydrochloride was purchased from Chem-Impex International, Inc.; di-*tert*-butyl dicarbonate (Boc<sub>2</sub>O) was purchased from Oakwood Chemicals, Inc.; trimethyltin hydroxide and sodium bis(2-methoxyethoxy)aluminum hydride (Red-Al) were purchased from Strem Chemicals, Inc.; thiopyridine *N*-oxide and 2-methyl-2-phenylpropionic acid were purchased from TCI America; *N,N,N',N'*-tetramethylchloroformamidinium hexafluorophosphate (TCFH) was purchased from AK Scientific, Inc. All other solvents and chemicals were purchased from Sigma–Aldrich.

**Instrumentation.** Proton nuclear magnetic resonance (<sup>1</sup>H NMR) spectra were recorded with a Varian inverse probe 500 INOVA spectrometer. Chemical shifts are recorded in parts per million on the δ scale and are referenced from the residual protium in the NMR solvent (CHCl<sub>3</sub>: δ 7.24, CDHCl<sub>2</sub>: 5.32, CD<sub>2</sub>HCN: 1.94, CD<sub>3</sub>SOCD<sub>2</sub>H: 2.50, C<sub>6</sub>D<sub>5</sub>H: 7.16). Data are reported as follows: chemical shift [multiplicity (s = singlet, d = doublet, t = triplet, q = quartet, m = multiplet), coupling constant(s) in Hertz, integration, assignment]. Carbon-13 nuclear magnetic resonance spectra were recorded with a Varian 500 INOVA spectrometer and are recorded in parts per million on the δ scale and are referenced from the carbon resonances of the solvent (CDCl<sub>3</sub>: δ 77.23; CD<sub>2</sub>Cl<sub>2</sub>: 54.00 CD<sub>3</sub>CN: 118.69, DMSO-*d*<sub>6</sub>: 39.51, C<sub>6</sub>D<sub>6</sub>: 128.39). Data are reported as

<sup>1</sup> W. C. Still, M. Kahn, and A. Mitra. *J. Org. Chem.* 1978, **43**, 2923.

<sup>2</sup> A. B. Pangborn, M. A. Giardello, R. H. Grubbs, R. K. Rosen, and F. Timmers, *J. Organometallics* 1996, **15**, 1518.

follows: chemical shift [multiplicity (s = singlet, d = doublet, t = triplet, q = quartet, m = multiplet), coupling constant(s) in Hertz, assignment]. Fluorine-19 nuclear magnetic resonance spectra were recorded with a Varian 300 INOVA spectrometer and are recorded in parts per million on the  $\delta$  scale and are referenced from the fluorine resonances of trifluoroacetic acid ( $\text{CF}_3\text{CO}_2\text{H}$   $\delta$  -76.55). Data are reported as follows: chemical shift [multiplicity (s = singlet, d = doublet, t = triplet, q = quartet, m = multiplet), coupling constant(s) in Hertz, integration, assignment]. Infrared data were obtained with a Perkin-Elmer 2000 FTIR and are reported as follows: [frequency of absorption ( $\text{cm}^{-1}$ ), intensity of absorption (s = strong, m = medium, w = weak, br = broad), assignment]. We thank Dr. Li Li at the Massachusetts Institute of Technology Department of Chemistry instrumentation facility for obtaining mass spectroscopic data. High resolution mass spectra (HRMS) were recorded on a Bruker Daltonics APEXIV 4.7 Tesla FT-ICR-MS using electrospray (ESI) ( $m/z$ ) ionization source.

**Positional Numbering System.** In assigning the  $^1\text{H}$  and  $^{13}\text{C}$  NMR data of all intermediates en route to (-)-calycanthidine (**1**), *meso*-chimonanthine (**2**), *meso*-calycanthine (**36**), (-)- and (+)-*N*<sub>7</sub>-desmethyl-*meso*-chimonanthine (**3**) we have employed a uniform numbering system.

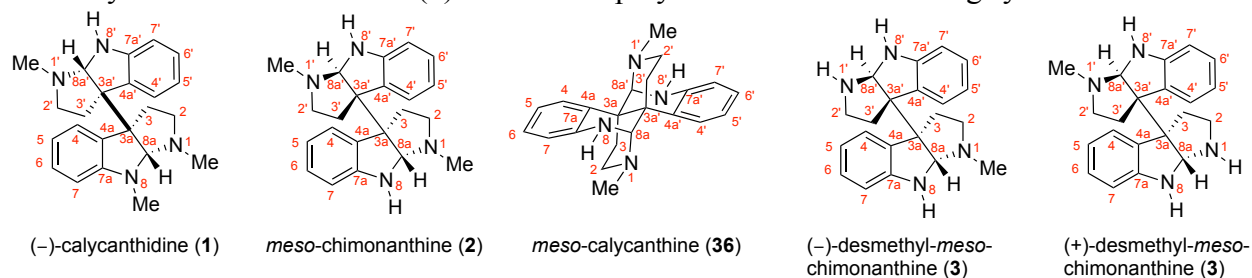

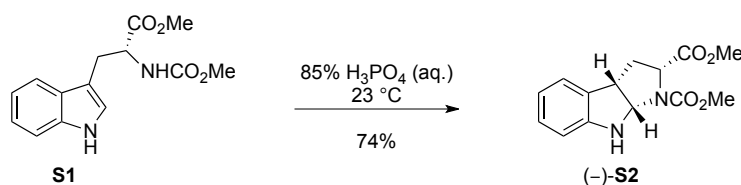

### **N1-Carboxymethyl Hexahydropyrroloindole (-)-S2:**

Aqueous phosphoric acid (85% w/v, 110 mL) was added to a flask containing indole **S1** (9.60 g, 36.3 mmol, 1 equiv) at 23 °C. The resulting heterogeneous mixture was stirred vigorously. After 8 h, the homogenous solution was poured slowly into a vigorously stirred biphasic mixture of dichloromethane (200 mL) and a solution of potassium carbonate (480 g) and potassium hydroxide (160 g) in water (1 L) at 0 °C. The pH of the mixture was maintained above 7 by the periodic addition of solid potassium carbonate (5 × 50 g). Once the addition was complete, the mixture was extracted with diethyl ether (3 × 300 mL). The combined organic layers were washed with brine (100 mL), were dried over anhydrous sodium sulfate, were filtered, and were concentrated under reduced pressure. The resulting residue was purified by flash column chromatography on silica gel (eluent: 15→25% acetone in hexanes) to give N1-carboxymethyl hexahydropyrroloindole (-)-**S2**<sup>3</sup> (7.40 g, 73.7%) as a white solid. Structural assignments were made using additional information from gCOSY, HSQC, and HMBC experiments.

<sup>1</sup>H NMR (500 MHz, C<sub>6</sub>D<sub>6</sub>, 20 °C):

*Major Rotamer:* δ 6.91 (app-t, *J* = 7.7 Hz, 1H, C<sub>6</sub>H), 6.78 (d, *J* = 7.5 Hz, 1H, C<sub>4</sub>H), 6.60 (app-t, *J* = 7.4 Hz, 1H, C<sub>5</sub>H), 6.33 (d, *J* = 7.7 Hz, 1H, C<sub>7</sub>H), 5.44 (d, *J* = 6.7 Hz, 1H C<sub>8a</sub>H), 5.39 (br-s, 1H, N<sub>8</sub>H), 4.27 (d, *J* = 9.0 Hz, 1H, C<sub>2</sub>H), 3.46 (s, 3H, N<sub>1</sub>CO<sub>2</sub>CH<sub>3</sub>), 3.30–3.27 (m, 1H, C<sub>3a</sub>H), 2.92 (s, 3H, CO<sub>2</sub>CH<sub>3</sub>), 2.30 (d, *J* = 13.1 Hz, 1H, C<sub>3</sub>H<sub>a</sub>), 1.92–1.84 (m, 1H, C<sub>3</sub>H<sub>b</sub>).

*Minor Rotamer:* δ 6.95 (app-t, *J* = 7.7 Hz, 1H, C<sub>6</sub>H), 6.81 (d, *J* = 7.5 Hz, 1H, C<sub>4</sub>H), 6.63 (app-t, *J* = 7.4 Hz, 1H, C<sub>5</sub>H), 6.45 (d, *J* = 7.7 Hz, 1H, C<sub>7</sub>H), 5.17 (d, *J* = 6.7 Hz, 1H C<sub>8a</sub>H), 4.77 (br-s, 1H, N<sub>8</sub>H), 4.61 (d, *J* = 9.0 Hz, 1H, C<sub>2</sub>H), 3.49 (s, 3H, N<sub>1</sub>CO<sub>2</sub>CH<sub>3</sub>), 3.30–3.27 (m, 1H, C<sub>3a</sub>H), 2.93 (s, 3H, CO<sub>2</sub>CH<sub>3</sub>), 2.29 (d, *J* = 13.1 Hz, 1H, C<sub>3</sub>H<sub>a</sub>), 1.92–1.84 (m, 1H, C<sub>3</sub>H<sub>b</sub>).

<sup>13</sup>C NMR (125.8 MHz, C<sub>6</sub>D<sub>6</sub>, 20 °C):

*Major Rotamer:* δ 171.9 (CO<sub>2</sub>CH<sub>3</sub>), 155.6 (N<sub>1</sub>CO<sub>2</sub>CH<sub>3</sub>), 151.3 (C<sub>7a</sub>), 129.1 (C<sub>4a</sub>), 128.9 (C<sub>6</sub>), 124.5 (C<sub>4</sub>), 118.8 (C<sub>5</sub>), 109.7 (C<sub>7</sub>), 78.1 (C<sub>8a</sub>), 59.6

<sup>3</sup> Due to facile opening of cyclotryptophan (-)-**S2** to the corresponding tryptophan derivative this material was used in the next step immediately following purification..

(C<sub>2</sub>), 52.7 (N<sub>1</sub>CO<sub>2</sub>CH<sub>3</sub>), 52.0 (CO<sub>2</sub>CH<sub>3</sub>), 45.4 (C<sub>3a</sub>), 34.9 (C<sub>3</sub>).

*Minor Rotamer:*  $\delta$  172.1 (CO<sub>2</sub>CH<sub>3</sub>), 154.8 (N<sub>1</sub>CO<sub>2</sub>CH<sub>3</sub>), 150.8 (C<sub>7a</sub>), 129.0 (C<sub>4a</sub>), 128.7 (C<sub>6</sub>), 124.6 (C<sub>4</sub>), 119.2 (C<sub>5</sub>), 109.6 (C<sub>7</sub>), 77.3 (C<sub>8a</sub>), 60.1 (C<sub>2</sub>), 52.7 (N<sub>1</sub>CO<sub>2</sub>CH<sub>3</sub>), 51.9 (CO<sub>2</sub>CH<sub>3</sub>), 46.7 (C<sub>3a</sub>), 34.4 (C<sub>3</sub>).

FTIR (thin film) cm<sup>-1</sup>: 3383 (br-w), 2953 (m), 1755 (s), 1702 (s), 1611 (m), 1451 (s), 1382(s).

HRMS (ESI) (*m/z*): calc'd for C<sub>14</sub>H<sub>17</sub>N<sub>2</sub>O<sub>4</sub> [M+H]<sup>+</sup>: 277.1183, found: 277.1179.

[ $\alpha$ ]<sub>D</sub><sup>24</sup>: -232 (*c* = 1.52, CH<sub>2</sub>Cl<sub>2</sub>).

TLC (25% acetone in hexanes), R<sub>f</sub>: 0.38 (UV, CAM).

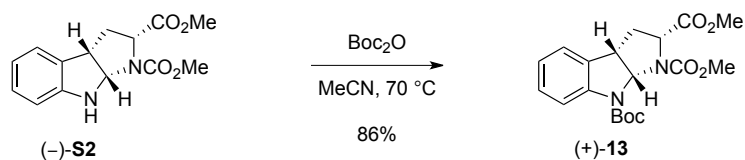

### **C2-Carboxymethyl Hexahydropyrroloindole (+)-13:**

Di-*tert*-butyl dicarbonate (7.70 g, 35.2 mmol, 3.00 equiv) was added to a solution of N1-carboxymethyl hexahydropyrroloindole (-)-**S2** (3.10 g, 11.7 mmol, 1 equiv) in acetonitrile (50 mL) at 23 °C. The reaction flask was fitted with a reflux condenser and heated to 70 °C. After 8 h, another portion of di-*tert*-butyl dicarbonate (7.70 g, 35.2 mmol, 3.00 equiv) was added and the solution was continued to stir at 70 °C. After 15 h, the homogenous solution was allowed to cool to 23 °C and concentrated under reduced pressure. The resulting residue was purified by flash column chromatography on silica gel (eluent: 10→20% acetone in hexanes) to give C2-carboxymethyl hexahydropyrroloindole (+)-**13** (3.80 g, 86.3%) as a white foam. Structural assignments were made using additional information from gCOSY, HSQC, and HMBC experiments.

$^1\text{H NMR}$  (500 MHz,  $\text{CD}_3\text{CN}$ , 20 °C):  $\delta$  7.52 (d,  $J = 8.0$  Hz, 1H,  $\text{C}_7\text{H}$ ), 7.19–7.14 (m, 2H,  $\text{C}_4\text{H}$ ,  $\text{C}_6\text{H}$ ), 6.98 (app-t,  $J = 7.5$  Hz, 1H,  $\text{C}_5\text{H}$ ), 6.32 (d,  $J = 6.5$  Hz, 1H,  $\text{C}_{8a}\text{H}$ ), 4.54 (d,  $J = 8.7$  Hz, 1H,  $\text{C}_2\text{H}$ ), 4.01 (app-t,  $J = 6.6$  Hz, 1H,  $\text{C}_{3a}\text{H}$ ), 3.66 (s, 3H,  $\text{N}_1\text{CO}_2\text{CH}_3$ ), 3.14 (s, 3H,  $\text{CO}_2\text{CH}_3$ ), 2.58 (ddd,  $J = 7.0, 8.7, 13.2$  Hz, 1H,  $\text{C}_3\text{H}_a$ ), 2.53 (ddd,  $J = 1.7, 1.8, 13.2$  Hz, 1H,  $\text{C}_3\text{H}_b$ ), 1.55 (s, 9H,  $\text{N}_8\text{CO}_2\text{C}(\text{CH}_3)_3$ ).

$^{13}\text{C NMR}$  (125.8 MHz,  $\text{CD}_3\text{CN}$ , 20 °C):  $\delta$  173.1 ( $\text{CO}_2\text{CH}_3$ ), 156.2 ( $\text{N}_1\text{CO}_2\text{CH}_3$ ), 153.6 ( $\text{N}_8\text{CO}_2\text{C}(\text{CH}_3)_3$ ), 144.4 ( $\text{C}_{7a}$ ), 133.6 ( $\text{C}_{4a}$ ), 129.4 ( $\text{C}_6$ ), 125.4 ( $\text{C}_4$ ), 124.4 ( $\text{C}_5$ ), 117.9 ( $\text{C}_7$ ), 82.3 ( $\text{N}_8\text{CO}_2\text{C}(\text{CH}_3)_3$ ), 76.7, ( $\text{C}_{8a}$ ), 60.7 ( $\text{C}_2$ ), 53.5 ( $\text{N}_1\text{CO}_2\text{CH}_3$ ), 52.3 ( $\text{CO}_2\text{CH}_3$ ), 46.2 ( $\text{C}_{3a}$ ), 34.3 ( $\text{C}_3$ ), 28.9 ( $\text{N}_8\text{CO}_2\text{C}(\text{CH}_3)_3$ ).

FTIR (thin film)  $\text{cm}^{-1}$ : 2979 (m), 1705 (s), 1605 (w), 1482 (s), 1447 (s).

HRMS (ESI) ( $m/z$ ): calc'd for  $\text{C}_{19}\text{H}_{25}\text{N}_2\text{O}_6$   $[\text{M}+\text{H}]^+$ : 377.1707, found: 377.1713.

$[\alpha]_D^{24}$ : +2.4 ( $c = 1.7$ ,  $\text{CH}_2\text{Cl}_2$ ).

TLC (33% acetone in hexanes),  $R_f$ : 0.47 (UV, CAM).

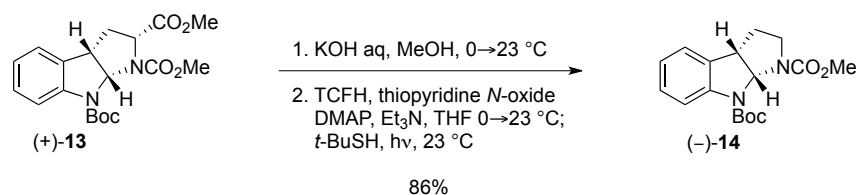

### **N8-Carboxy-*tert*-Butyl Hexahydropyrroloindole (-)-14:**

An aqueous solution of potassium hydroxide (5 N, 55 mL) was added to a solution of C2-carboxymethyl hexahydropyrroloindole (+)-**13** (3.20 g, 8.50 mmol, 1 equiv) in methanol (110 mL) at 0 °C in an ice bath. After 10 min, the ice bath was removed and the mixture was allowed to warm to 23 °C. After 2 h, the resulting solution was cooled to 0 °C in an ice bath and adjusted to pH ~ 2 by the dropwise addition of an aqueous solution of hydrochloric acid (12 N, 25 mL). The mixture was allowed to warm to 23 °C and extracted with dichloromethane (3 × 150 mL). The combined organic layers were washed with brine (50 mL), were dried over anhydrous sodium sulfate, were filtered, and were concentrated under reduced pressure to afford the crude carboxylic acid as a white foam.

Thiopyridine *N*-oxide (1.73 g, 13.6 mmol, 1.60 equiv), 4-(dimethylamino)pyridine (104 mg, 850 μmol, 0.10 equiv), and *N,N,N',N'*-tetramethylchloroformamidinium hexafluorophosphate (TCFH, 3.19 g, 12.8 mmol, 1.50 equiv) were sequentially added to a solution of the crude carboxylic acid in tetrahydrofuran (85 mL) cooled to 0 °C in an ice bath. The reaction flask was removed from the ice bath, covered in aluminum foil and triethylamine (4.75 mL, 34.0 mmol, 4.00 equiv) was added while the reaction mixture was still cold. After 1.5 h, *tert*-butylthiol (4.80 mL, 42.5 mmol, 5.00 equiv) was added via syringe and the aluminum foil was removed from the flask. The resulting suspension was irradiated with a flood lamp (500 W). After 2 h, the lamp was shut off and the tetrahydrofuran was removed under reduced pressure. The resulting residue was diluted with dichloromethane (200 mL) and was washed with aqueous saturated sodium bicarbonate solution (50 mL). The aqueous layer was extracted with dichloromethane (2 × 100 mL). The combined organic extracts were washed with brine (50 mL), were dried over anhydrous sodium sulfate, were filtered and were concentrated under reduced pressure. The resulting residue was purified by flash column chromatography on silica gel (eluent: 5→10% acetone in hexanes) to afford N8-carboxy-*tert*-butyl hexahydropyrroloindole (-)-**14** (2.33 g, 86.1%, overall from (+)-**13**) as a clear viscous oil. Structural assignments were made using additional information from gCOSY, HSQC, and HMBC experiments.

<sup>1</sup>H NMR (500 MHz, CD<sub>3</sub>CN, 20 °C): δ 7.61 (d, *J* = 8.1 Hz, 1H, C<sub>7</sub>H), 7.23 (d, *J* = 7.4 Hz, 1H, C<sub>4</sub>H), 7.19 (app-t, *J* = 7.5 Hz, 1H, C<sub>6</sub>H), 7.03 (app-t, *J* = 7.5 Hz, 1H, C<sub>5</sub>H), 6.31 (d, *J* = 6.9 Hz, 1H, C<sub>8a</sub>H), 4.01 (app-t, *J* = 7.2 Hz, 1H, C<sub>3a</sub>H), 3.75 (dd, *J* = 7.7, 11.1 Hz, 1H, C<sub>2</sub>H<sub>a</sub>), 3.64 (s, 3H, N<sub>1</sub>CO<sub>2</sub>CH<sub>3</sub>), 2.76 (app-dt, *J* = 5.6, 11.6 Hz, 1H, C<sub>2</sub>H<sub>b</sub>), 2.15 (app-tt, *J* = 7.7, 12.0 Hz, 1H, C<sub>3</sub>H<sub>a</sub>), 2.05 (dd, *J* = 5.6, 6.9 Hz, 1H, C<sub>3</sub>H<sub>b</sub>), 1.53 (s, 9H, N<sub>8</sub>CO<sub>2</sub>C(CH<sub>3</sub>)<sub>3</sub>).

$^{13}\text{C}$  NMR (125.8 MHz,  $\text{CD}_3\text{CN}$ , 20 °C):  $\delta$  156.5 ( $\text{N}_1\text{CO}_2\text{CH}_3$ ), 153.8 ( $\text{N}_8\text{CO}_2\text{C}(\text{CH}_3)_3$ ), 144.2 ( $\text{C}_{7a}$ ), 133.9 ( $\text{C}_{4a}$ ), 129.2 ( $\text{C}_6$ ), 125.5 ( $\text{C}_4$ ), 124.6 ( $\text{C}_5$ ), 117.1 ( $\text{C}_7$ ), 82.3 ( $\text{N}_8\text{CO}_2\text{C}(\text{CH}_3)_3$ ), 78.1 ( $\text{C}_{8a}$ ), 53.3 ( $\text{N}_1\text{CO}_2\text{CH}_3$ ), 46.6 ( $\text{C}_{3a}$ ), 46.3 ( $\text{C}_2$ ), 32.0 ( $\text{C}_3$ ), 28.9 ( $\text{N}_8\text{CO}_2\text{C}(\text{CH}_3)_3$ ).

FTIR (thin film)  $\text{cm}^{-1}$ : 2977 (m), 1704 (s), 1604 (w), 1483 (s), 1446 (s).

HRMS (ESI) ( $m/z$ ): calc'd for  $\text{C}_{17}\text{H}_{23}\text{N}_2\text{O}_4$   $[\text{M}+\text{H}]^+$ : 319.1652, found: 319.1672.

$[\alpha]_D^{24}$ :  $-127$  ( $c = 1.37$ ,  $\text{CH}_2\text{Cl}_2$ ).

TLC (33% acetone in hexanes),  $R_f$ : 0.42 (UV, CAM).



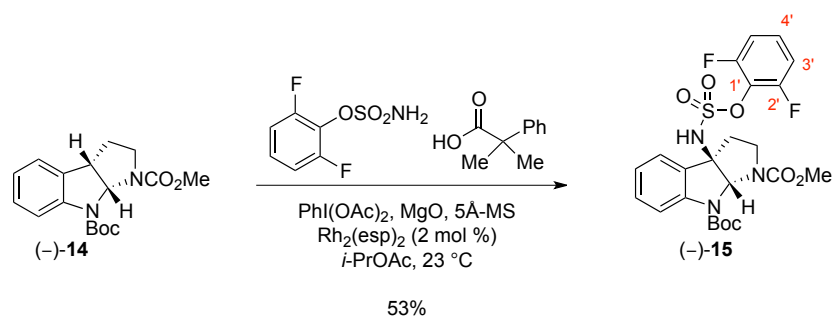

### Hexahydropyrroloindole Sulfamate Ester (–)-15:

A round bottom flask was charged with 5Å molecular sieves (296 mg, 200 mg/mmol of **14**), magnesium oxide (239 mg, 5.92 mmol, 4.00 equiv) and flame-dried under vacuum for 5 min. The reaction vessel was allowed to cool to 23 °C and back filled with argon. Solid 2,6-difluorophenyl sulfamate<sup>4</sup> (402 mg, 1.92 mmol, 1.30 equiv), 2-methyl-2-phenylpropionic acid (122 mg, 0.740 mmol, 0.500 equiv), and Rh<sub>2</sub>(esp)<sub>2</sub> (23.0 mg, 300 μmol, 0.0200 equiv) were added sequentially. A solution of N8-carboxy-*tert*-butyl hexahydropyrroloindole (–)-**14** (470 mg, 1.48 mmol, 1 equiv) in isopropyl acetate (3.0 mL) was added via syringe at 23 °C and the mixture was allowed to stir. After 5 min, (diacetoxyiodo)benzene (953 mg, 1.92 mmol, 2.00 equiv) was added and the green heterogeneous mixture was agitated by vigorous stirring at 23 °C. After 14 h, the reaction mixture was filtered through a pad of Celite and the filter cake was rinsed with ethyl acetate (40 mL). The filtrate was concentrated under reduced pressure. The resulting residue was purified by flash column chromatography on silica gel (eluent: gradient, 15→33% ethyl acetate in hexanes) to afford the hexahydropyrroloindole sulfamate ester (–)-**15** (413 mg, 53.1%) as a white solid. Structural assignments were made using additional information from gCOSY, HSQC, and HMBC experiments.

<sup>1</sup>H NMR (500 MHz, CD<sub>3</sub>CN, 20 °C): δ 7.68 (d, *J* = 8.1 Hz, 1H, C<sub>7</sub>H), 7.47 (d, *J* = 7.7 Hz, 1H, C<sub>4</sub>H), 7.39–7.32 (m, 2H, C<sub>6</sub>H, C<sub>4</sub>H), 7.16–7.11 (m, 3H, C<sub>5</sub>H, C<sub>3</sub>H), 7.06 (br-s, 1H, C<sub>3a</sub>NH), 6.50 (s, 1H, C<sub>8a</sub>H), 3.85 (dd, *J* = 6.9, 10.3 Hz, 1H, C<sub>2</sub>H<sub>a</sub>), 3.66 (s, 3H, N<sub>1</sub>CO<sub>2</sub>CH<sub>3</sub>), 2.77–2.65 (m, 2H, C<sub>2</sub>H<sub>b</sub>, C<sub>3</sub>H<sub>a</sub>), 2.47 (dd, *J* = 4.3, 11.4 Hz, 1H, C<sub>3</sub>H<sub>b</sub>), 1.50 (s, 9H, N<sub>8</sub>CO<sub>2</sub>C(CH<sub>3</sub>)<sub>3</sub>).

<sup>13</sup>C NMR (125.8 MHz, CD<sub>3</sub>CN, 20 °C): δ 157.2 (dd, *J* = 3.5, 251.8 Hz, C<sub>2</sub>'), 156.2 (N<sub>1</sub>CO<sub>2</sub>CH<sub>3</sub>), 153.5 (N<sub>8</sub>CO<sub>2</sub>C(CH<sub>3</sub>)<sub>3</sub>), 144.9 (C<sub>7a</sub>), 131.8 (C<sub>6</sub>), 130.8 (C<sub>4a</sub>), 129.2 (app-t, *J* = 9.4 Hz, C<sub>4</sub>'), 127.8 (t, *J* = 15.8 Hz, C<sub>1</sub>'), 125.9 (C<sub>4</sub>), 125.1 (C<sub>5</sub>), 118.1 (C<sub>7</sub>), 114.1 (dd, *J* = 4.0, 18.4 Hz, C<sub>3</sub>'), 82.7 (N<sub>8</sub>CO<sub>2</sub>C(CH<sub>3</sub>)<sub>3</sub>), 81.1, (C<sub>8a</sub>), 72.8 (C<sub>3a</sub>), 53.6 (N<sub>1</sub>CO<sub>2</sub>CH<sub>3</sub>), 46.2 (C<sub>2</sub>), 36.6 (C<sub>3</sub>), 28.8 (N<sub>8</sub>CO<sub>2</sub>C(CH<sub>3</sub>)<sub>3</sub>).

<sup>4</sup> J. L. Roizen, D. N. Zalatan and J. Du Bois, *Angew. Chem. Int. Ed.*, 2013, *Early View*, DOI: 10.1002/anie.201304238.

|                                                         |                                                                                                                                       |
|---------------------------------------------------------|---------------------------------------------------------------------------------------------------------------------------------------|
| $^{19}\text{F}$ NMR (282 MHz, $\text{CDCl}_3$ , 20 °C): | $\delta$ -124.8 (t, $J$ = 6.6 Hz, 2F, $\text{C}_6\text{H}_3\text{F}_2$ ).                                                             |
| FTIR (thin film) $\text{cm}^{-1}$ :                     | 3168 (br-m), 2981 (w), 1712 (s), 1680 (s), 1606 (w), 1481 (s).                                                                        |
| HRMS (ESI) ( $m/z$ ):                                   | calc'd for $\text{C}_{23}\text{H}_{26}\text{F}_2\text{N}_3\text{O}_7\text{S}$ $[\text{M}+\text{H}]^+$ : 526.1454,<br>found: 526.1465. |
| $[\alpha]_{\text{D}}^{24}$ :                            | -82 ( $c$ = 1.04, $\text{CH}_2\text{Cl}_2$ ).                                                                                         |
| TLC (33% ethyl acetate in hexanes), $R_f$ :             | 0.26 (UV, CAM).                                                                                                                       |

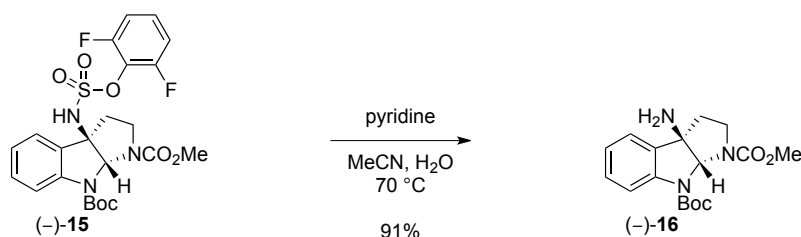

### **C3a-Aminohexahydropyrroloindole (–)-16:**

Pyridine (613  $\mu\text{L}$ , 7.61 mmol, 20.0 equiv) was added to a solution of hexahydropyrroloindole sulfamate ester (–)-**15** (200 mg, 381  $\mu\text{mol}$ , 1 equiv) in a mixture of acetonitrile–water (2:1, 4.50 mL), via syringe at 23 °C. The reaction flask was fitted with a reflux condenser and heated to 70 °C. After 24 h, the resulting yellow solution was allowed to cool to 23 °C. The mixture was diluted with dichloromethane (50 mL) and was washed with a saturated aqueous sodium bicarbonate solution (20 mL). The aqueous layer was extracted with dichloromethane (2  $\times$  30 mL). The combined organic extracts were washed with brine (20 mL), were dried over anhydrous sodium sulfate, were filtered, and were concentrated under reduced pressure. The resulting residue was purified by flash column chromatography on silica gel (eluent: gradient, 1 $\rightarrow$ 5% methanol in dichloromethane) to afford the C3a-aminohexahydropyrroloindole (–)-**16** (115 mg, 90.5%) as a yellow oil. Structural assignments were made using additional information from gCOSY, HSQC, and HMBC experiments.

$^1\text{H}$  NMR (500 MHz,  $\text{CD}_3\text{CN}$ , 20 °C):  $\delta$  7.63 (d,  $J = 8.1$  Hz, 1H,  $\text{C}_7\text{H}$ ), 7.34 (d,  $J = 7.5$  Hz, 1H,  $\text{C}_4\text{H}$ ), 7.26 (app-t,  $J = 7.5$  Hz, 1H,  $\text{C}_6\text{H}$ ), 7.07 (app-t,  $J = 7.5$  Hz, 1H,  $\text{C}_5\text{H}$ ), 5.77 (s, 1H,  $\text{C}_{8a}\text{H}$ ), 3.73 (dd,  $J = 7.9, 11.1$  Hz, 1H,  $\text{C}_2\text{H}_a$ ), 3.64 (s, 3H,  $\text{N}_1\text{CO}_2\text{CH}_3$ ), 2.75 (app-dt,  $J = 5.6, 11.7$  Hz, 1H,  $\text{C}_2\text{H}_b$ ), 2.22 (dd,  $J = 7.9, 11.1$  Hz, 1H,  $\text{C}_3\text{H}_a$ ), 2.09 (app-dt,  $J = 8.1, 12.2$  Hz, 1H,  $\text{C}_3\text{H}_b$ ), 1.92 (br-s, 2H,  $\text{NH}_2$ ), 1.54 (s, 9H,  $\text{N}_8\text{CO}_2\text{C}(\text{CH}_3)_3$ ).

$^{13}\text{C}$  NMR (125.8 MHz,  $\text{CD}_3\text{CN}$ , 20 °C):  $\delta$  156.5 ( $\text{N}_1\text{CO}_2\text{CH}_3$ ), 154.0 ( $\text{N}_8\text{CO}_2\text{C}(\text{CH}_3)_3$ ), 143.9 ( $\text{C}_{7a}$ ), 136.9 ( $\text{C}_{4a}$ ), 130.3 ( $\text{C}_6$ ), 124.8 ( $\text{C}_2$ ,  $\text{C}_4$ ,  $\text{C}_5$ ), 117.5 ( $\text{C}_7$ ), 84.6 ( $\text{C}_{8a}$ ), 82.3 ( $\text{N}_8\text{CO}_2\text{C}(\text{CH}_3)_3$ ), 70.3 ( $\text{C}_{3a}$ ), 53.3 ( $\text{N}_1\text{CO}_2\text{CH}_3$ ), 47.0 ( $\text{C}_2$ ), 39.4 ( $\text{C}_3$ ), 28.9 ( $\text{N}_8\text{CO}_2\text{C}(\text{CH}_3)_3$ ).

FTIR (thin film)  $\text{cm}^{-1}$ : 3369 (br-w), 3302 (br-w), 2977 (w), 1702 (s), 1603 (w), 1480 (m), 1447 (m), 1393 (m), 1200 (m).

HRMS (ESI) ( $m/z$ ): calc'd for  $\text{C}_{17}\text{H}_{24}\text{N}_3\text{O}_4$  [ $\text{M}+\text{H}$ ] $^+$ : 334.1761, found: 334.1783.

$[\alpha]_D^{24}$ :  $-119$  ( $c = 1.55$ ,  $\text{CH}_2\text{Cl}_2$ ).

TLC (50% acetone in hexanes),  $R_f$ : 0.15 (UV, CAM).

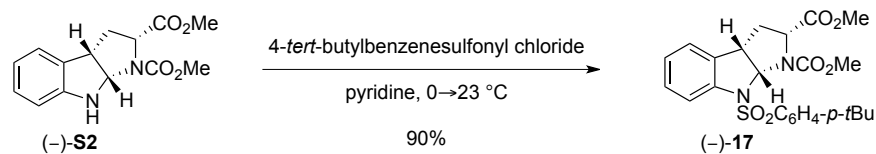

### **C2-Carboxymethyl Hexahydropyrroloindole (–)-17:**

A solution of 4-*tert*-butylbenzenesulfonyl chloride (3.50 g, 15.1 mmol, 2.00 equiv) in pyridine (3 mL) was added dropwise via syringe to a solution of hexahydropyrroloindole (–)-**S2** (2.00 g, 7.57 mmol, 1 equiv) in pyridine (20 mL) at 0 °C in an ice bath. After 15 min, the ice bath was removed and allowed to warm to 23 °C. After 4 h, the solution was concentrated under reduced pressure. The resulting residue was diluted with ethyl acetate (250 mL) and washed sequentially with an aqueous solution of hydrochloric acid (1 N, 2 × 25 mL), saturated aqueous solution of sodium bicarbonate (25 mL), and brine (50 mL). The organic layer was separated, was dried over anhydrous sodium sulfate, was filtered, and was concentrated under reduced pressure. The resulting residue was purified by flash column chromatography on silica gel (eluent: 15→25% acetone in hexanes) to give C2-carboxymethyl hexahydropyrroloindole (–)-**17** (3.20 g, 89.5%) as a white solid.

As a result of the slow conformational equilibration at ambient temperature, NMR spectra were collected at elevated temperature. Structural assignments were made using additional information from gCOSY, HSQC, and HMBC experiments also collected at elevated temperature.

$^1\text{H}$  NMR (500 MHz,  $\text{CD}_3\text{CN}$ , 70 °C):  $\delta$  7.66 (d,  $J$  = 8.6 Hz, 2H,  $\text{N}_8\text{SO}_2\text{Ar-}o\text{-H}$ ), 7.50 (d,  $J$  = 8.6 Hz, 2H,  $\text{N}_8\text{SO}_2\text{Ar-}m\text{-H}$ ), 7.38 (d,  $J$  = 8.1 Hz, 1H,  $\text{C}_7\text{H}$ ), 7.23 (app-t,  $J$  = 7.2 Hz, 1H,  $\text{C}_6\text{H}$ ), 7.10 (d,  $J$  = 7.4 Hz, 1H,  $\text{C}_4\text{H}$ ), 7.07 (app-t,  $J$  = 7.2 Hz, 1H,  $\text{C}_5\text{H}$ ), 6.29 (d,  $J$  = 6.5 Hz, 1H  $\text{C}_{8a}\text{H}$ ), 4.54 (d,  $J$  = 9.0 Hz, 1H,  $\text{C}_2\text{H}$ ), 3.71 (app-t,  $J$  = 6.9 Hz, 1H,  $\text{C}_{3a}\text{H}$ ), 3.60 (s, 3H,  $\text{N}_1\text{CO}_2\text{CH}_3$ ), 3.16 (s, 3H,  $\text{CO}_2\text{CH}_3$ ), 2.61–2.49 (m, 2H,  $\text{C}_3\text{H}$ ), 1.30 (s, 9H,  $\text{C}(\text{CH}_3)_3$ ).

$^{13}\text{C}$  NMR (125.8 MHz,  $\text{CD}_3\text{CN}$ , 70 °C):  $\delta$  173.2 ( $\text{CO}_2\text{CH}_3$ ) 158.9 ( $\text{N}_8\text{SO}_2\text{Ar-}p\text{-C}$ ), 156.5 ( $\text{N}_1\text{CO}_2\text{CH}_3$ ), 144.3 ( $\text{C}_{7a}$ ), 138.5 ( $\text{N}_8\text{SO}_2\text{Ar-}ipso\text{-C}$ ), 135.8 ( $\text{C}_{4a}$ ), 130.2 ( $\text{C}_6$ ), 128.6 ( $\text{N}_8\text{SO}_2\text{Ar-}o\text{-C}$ ), 127.7 ( $\text{N}_8\text{SO}_2\text{Ar-}m\text{-C}$ ), 126.9 ( $\text{C}_4$ ), 126.3 ( $\text{C}_5$ ), 119.8 ( $\text{C}_7$ ), 82.5 ( $\text{C}_{8a}$ ), 60.9 ( $\text{C}_2$ ), 53.8 ( $\text{NCO}_2\text{CH}_3$ ), 53.1 ( $\text{CO}_2\text{CH}_3$ ), 47.4 ( $\text{C}_{3a}$ ), 36.6 ( $\text{C}(\text{CH}_3)_3$ ), 35.1 ( $\text{C}_3$ ), 32.1 ( $\text{C}(\text{CH}_3)_3$ ).

FTIR (thin film)  $\text{cm}^{-1}$ : 2956 (w), 1711 (s), 1595 (w), 1447 (m), 1384 (m), 1360 (m), 1169 (m).

HRMS (ESI) ( $m/z$ ): calc'd for  $\text{C}_{24}\text{H}_{29}\text{N}_2\text{O}_6\text{S}$  [ $\text{M}+\text{H}$ ] $^+$ : 473.1741, found: 473.1740.

$[\alpha]_D^{24}$ :  $-71$  ( $c = 0.44$ ,  $\text{CH}_2\text{Cl}_2$ ).

TLC (33% acetone in hexanes),  $R_f$ :  $0.33$  (UV, CAM).

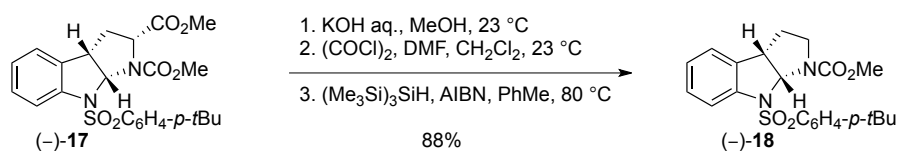

### **N8-*tert*-Butylbenzenesulfonyl Hexahydropyrroloindole (-)-18:**

An aqueous solution of potassium hydroxide (5 N, 30 mL) was added to a solution of C2-carboxymethyl hexahydropyrroloindole (-)-**17** (3.10 g, 6.56 mmol, 1.00 equiv) in methanol (60 mL) at 23 °C. After 40 min, the resulting solution was cooled to 0 °C in an ice bath and adjusted to pH ~ 2 by the dropwise addition of an aqueous solution of hydrochloric acid (12 N, 15 mL). The mixture was allowed to warm to 23 °C and was extracted with dichloromethane (3 × 150 mL). The combined organic layers were washed with brine (50 mL), were dried over anhydrous sodium sulfate, were filtered, and were concentrated under reduced pressure to afford the crude carboxylic acid as a white foam. The crude carboxylic acid was concentrated from benzene (15 mL) under reduced pressure to remove residual methanol.

Oxalyl chloride (1.60 mL, 18.9 mmol, 3.00 equiv) and dimethylformamide (48.0 μL, 630 μmol, 0.100 equiv) were added sequentially via syringe to a solution of the crude carboxylic acid in dichloromethane (65 mL) at 23 °C. After 1 h, the solution was concentrated under reduced pressure. The resulting residue was concentrated from benzene (2 × 20 mL) to remove the remaining oxalyl chloride. The crude acid chloride was dissolved in toluene (120 mL) and argon was bubbled through the solution for 10 min. Tris(trimethylsilyl)silane (2.90 mL, 9.45 mmol, 1.50 equiv) and azobisisobutyronitrile (AIBN, 103 mg, 630 μmol, 0.10 equiv) were added to the solution at 23 °C. The flask was fitted with a reflux condenser and heated to 80 °C. After 45 min, an additional portion of tris(trimethylsilyl)silane (2.90 mL, 9.45 mmol, 1.50 equiv) and AIBN (103 mg, 630 μmol, 0.10 equiv) were added. After a further 1.5 h, another portion of AIBN (103 mg, 630 μmol, 0.10 equiv) was added. After an additional 1.5 h the reaction mixture was allowed to cool to 23 °C and was concentrated under reduced pressure. The resulting residue was purified by flash column chromatography on silica gel (eluent: 15→20% acetone in hexanes) to give N8-*tert*-butylbenzenesulfonyl hexahydropyrroloindole (-)-**18** (2.40 g, 88.3%, overall from (-)-**17**) as a white foam.

As a result of the slow conformational equilibration at ambient temperature, NMR spectra were collected at elevated temperature. Structural assignments were made using additional information from gCOSY, HSQC, and HMBC experiments also collected at elevated temperature.

<sup>1</sup>H NMR (500 MHz, CD<sub>3</sub>CN, 70 °C): δ 7.65 (d, *J* = 8.6 Hz, 2H, N<sub>8</sub>SO<sub>2</sub>Ar-*o*-H), 7.50–7.49 (m, 3H, N<sub>8</sub>SO<sub>2</sub>Ar-*m*-H, C<sub>7</sub>H), 7.25 (app-t, *J* = 8.0 Hz, 1H, C<sub>6</sub>H), 7.16 (d, *J* = 7.4 Hz, 1H, C<sub>4</sub>H), 7.10 (app-t, *J* = 7.4 Hz, 1H, C<sub>5</sub>H), 6.25 (d, *J* = 6.7 Hz, 1H, C<sub>8a</sub>H), 3.74–3.70 (m, 2H, C<sub>3a</sub>H, C<sub>2</sub>H<sub>a</sub>), 3.67 (s, 3H, N<sub>1</sub>CO<sub>2</sub>CH<sub>3</sub>), 2.77 (app-dt, *J* = 5.7, 11.5 Hz, 1H, C<sub>2</sub>H<sub>b</sub>), 2.15 (app-ddt, *J* = 7.9, 11.6, 12.6 Hz, 1H, C<sub>3</sub>H<sub>a</sub>), 2.00 (dd, *J* = 5.5, 12.2 Hz, 1H, C<sub>3</sub>H<sub>b</sub>), 1.30 (s, 9H, C(CH<sub>3</sub>)<sub>3</sub>).

|                                                                  |                                                                                                                                                                                                                                                                                                                                                                                                                                                                                                                                                                                                                                                                    |
|------------------------------------------------------------------|--------------------------------------------------------------------------------------------------------------------------------------------------------------------------------------------------------------------------------------------------------------------------------------------------------------------------------------------------------------------------------------------------------------------------------------------------------------------------------------------------------------------------------------------------------------------------------------------------------------------------------------------------------------------|
| $^{13}\text{C}$ NMR (125.8 MHz, $\text{CD}_3\text{CN}$ , 70 °C): | $\delta$ 159.1 ( $\text{N}_8\text{SO}_2\text{Ar-}p\text{-C}$ ), 156.6 ( $\text{N}_1\text{CO}_2\text{CH}_3$ ), 143.9 ( $\text{C}_{7a}$ ), 137.9 ( $\text{N}_8\text{SO}_2\text{Ar-}ipso\text{-C}$ ), 136.0 ( $\text{C}_{4a}$ ), 130.0 ( $\text{C}_6$ ), 128.8 ( $\text{N}_8\text{SO}_2\text{Ar-}o\text{-C}$ ), 127.8 ( $\text{N}_8\text{SO}_2\text{Ar-}m\text{-C}$ ), 127.1 ( $\text{C}_4$ ), 126.3 ( $\text{C}_5$ ), 118.9 ( $\text{C}_7$ ), 82.0 ( $\text{C}_{8a}$ ), 53.7 ( $\text{N}_1\text{CO}_2\text{CH}_3$ ), 47.8 ( $\text{C}_{3a}$ ), 46.5 ( $\text{C}_2$ ), 36.6 ( $\text{C}(\text{CH}_3)_3$ ), 32.2 ( $\text{C}_3$ ), 32.1 ( $\text{C}(\text{CH}_3)_3$ ). |
| FTIR (thin film) $\text{cm}^{-1}$ :                              | 2961 (m), 1709 (s), 1447 (m), 1385 (m), 1360 (m).                                                                                                                                                                                                                                                                                                                                                                                                                                                                                                                                                                                                                  |
| HRMS (ESI) ( $m/z$ ):                                            | calc'd for $\text{C}_{22}\text{H}_{27}\text{N}_2\text{O}_4\text{S}$ $[\text{M}+\text{H}]^+$ : 415.1686,<br>found: 415.1676 .                                                                                                                                                                                                                                                                                                                                                                                                                                                                                                                                       |
| $[\alpha]_D^{24}$ :                                              | -198 ( $c = 0.19$ , $\text{CH}_2\text{Cl}_2$ ).                                                                                                                                                                                                                                                                                                                                                                                                                                                                                                                                                                                                                    |
| TLC (33% acetone in hexanes), $R_f$ :                            | 0.34 (UV, CAM).                                                                                                                                                                                                                                                                                                                                                                                                                                                                                                                                                                                                                                                    |

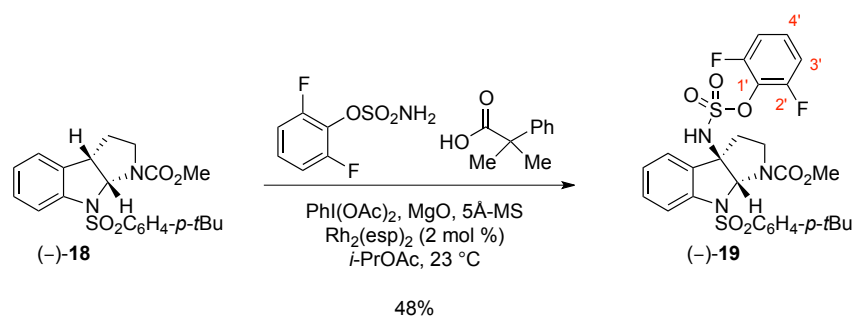

### **Hexahydropyrroloindole Sulfamate Ester (–)-19:**

A round bottom flask was charged with 5 Å molecular sieves (482 mg, 200 mg/mmol of **18**), magnesium oxide (388 mg, 9.64 mmol, 4.00 equiv), and flame-dried under vacuum for 5 min. The reaction vessel was allowed to cool to 23 °C and back filled with argon. Solid 2,6-difluorophenyl sulfamate<sup>4</sup> (656 mg, 3.14 mmol, 1.30 equiv), 2-methyl-2-phenylpropionic acid (198 mg, 1.21 mmol, 0.500 equiv), and Rh<sub>2</sub>(esp)<sub>2</sub> (3.7 mg, 48 μmol, 0.020 equiv) were added sequentially and the mixture was sealed under argon. A solution of N8-*tert*-butylbenzenesulfonyl hexahydropyrroloindole (–)-**18** (1.00 g, 2.41 mmol, 1 equiv) in isopropyl acetate (5.0 mL) was added via syringe at 23 °C and the mixture was allowed to stir. After 5 min, (diacetoxyiodo)benzene (1.55 g, 4.82 mmol, 2.00 equiv) was added and the resulting green heterogeneous mixture was agitated by vigorous stirring at 23 °C. After 14 h, the mixture was filtered through a pad of Celite and the filter cake was rinsed with ethyl acetate (50 mL). The filtrate was concentrated under reduced pressure. The resulting residue was purified by flash column chromatography on silica gel (eluent: gradient, 15→20% acetone in hexanes) to afford a mixture of the desired sulfamate ester (–)-**19** along with minor amounts of regioisomeric amination products. The mixture was triturated with dichloromethane in hexanes (33% v/v, 20 mL) and the resulting suspension was filtered over a sintered glass funnel and rinsed with cold dichloromethane in hexanes (33% v/v, 10 mL) to afford pure hexahydropyrroloindole sulfamate ester (–)-**19** (0.578 g, 38.5%) as a white solid. The filtrate was concentrated under reduced pressure. The resulting residue was purified by flash column chromatography on silica gel (eluent: gradient, 20→33% ethyl acetate in hexanes) to afford a second portion of pure hexahydropyrroloindole sulfamate ester (–)-**19** (140 mg, 9.3%) as a white solid. Structural assignments were made using additional information from gCOSY, HSQC, and HMBC experiments.

<sup>1</sup>H NMR (500 MHz, CDCl<sub>3</sub>, 20 °C):

δ 7.71 (d, *J* = 8.1 Hz, 1H, C<sub>7</sub>H), 7.57 (br-s, 2H, N<sub>8</sub>SO<sub>2</sub>Ar-*o*-H), 7.43 (app-t, *J* = 7.6 Hz, 1H, C<sub>6</sub>H), 7.37–7.34 (m, C<sub>4</sub>H, N<sub>8</sub>SO<sub>2</sub>Ar-*m*-H), 7.26–7.20 (m, C<sub>5</sub>H, C<sub>4</sub>H), 7.01 (app-t, *J* = 7.8 Hz, 2H, C<sub>3</sub>H), 6.20 (s, 1H, C<sub>8a</sub>H), 3.94 (s, 1H, C<sub>3a</sub>NH), 3.86 (dd, *J* = 8.0, 11.1, 1H, C<sub>2</sub>H<sub>a</sub>), 3.72 (s, 3H, N<sub>1</sub>CO<sub>2</sub>CH<sub>3</sub>), 2.99 (app-dt, *J* = 8.1, 12.1 Hz, 1H, C<sub>2</sub>H<sub>a</sub>), 2.76 (br-s, 1H, C<sub>2</sub>H<sub>b</sub>), 2.43 (dd, *J* = 4.9, 12.4 Hz, 1H C<sub>3</sub>H<sub>b</sub>), 1.18 (s, 9H, C(CH<sub>3</sub>)<sub>3</sub>).



|                                                           |                                                                                                                                                                                                                                                                                                                                                                                                                                                                                                                                                                                                                                                                                                                                                                                                                                                     |
|-----------------------------------------------------------|-----------------------------------------------------------------------------------------------------------------------------------------------------------------------------------------------------------------------------------------------------------------------------------------------------------------------------------------------------------------------------------------------------------------------------------------------------------------------------------------------------------------------------------------------------------------------------------------------------------------------------------------------------------------------------------------------------------------------------------------------------------------------------------------------------------------------------------------------------|
| $^{13}\text{C}$ NMR (125.8 MHz, $\text{CDCl}_3$ , 20 °C): | $\delta$ 157.9 ( $\text{N}_8\text{SO}_2\text{Ar-}p\text{-C}$ ), 156.1 (dd, $J = 3.4$ , 253.7 Hz, $\text{C}_{2'}$ ), 155.0 ( $\text{N}_1\text{CO}_2\text{CH}_3$ ), 142.7 ( $\text{C}_{7a}$ ), 135.1 ( $\text{N}_8\text{SO}_2\text{Ar-}ipso\text{-C}$ ), 131.9 ( $\text{C}_{4a}$ ), 131.6 ( $\text{C}_6$ ), 128.1 (app-t, $J = 9.3$ Hz, $\text{C}_{1'}$ ), 127.7 ( $\text{C}_{4'}$ ), 127.1 ( $\text{N}_8\text{SO}_2\text{Ar-}o\text{-C}$ ), 126.8 ( $\text{N}_8\text{SO}_2\text{Ar-}m\text{-C}$ ), 126.7 ( $\text{C}_5$ ), 124.3 ( $\text{C}_4$ ), 119.7 ( $\text{C}_7$ ), 112.9 (dd, $J = 3.9$ , 18.4 Hz, $\text{C}_{3'}$ ), 82.6 ( $\text{C}_{8a}$ ), 72.6 ( $\text{C}_{3a}$ ), 53.1 ( $\text{N}_1\text{CO}_2\text{CH}_3$ ), 45.2 ( $\text{C}_2$ ), 35.4 ( $\text{C}(\text{CH}_3)_3$ ), 32.7 ( $\text{C}_3$ ), 31.0 ( $\text{C}(\text{CH}_3)_3$ ). |
| $^{19}\text{F}$ NMR (282 MHz, $\text{CDCl}_3$ , 20 °C):   | $\delta$ -124.9 (t, $J = 6.6$ Hz, 2F, $\text{C}_6\text{H}_3\text{F}_2$ ).                                                                                                                                                                                                                                                                                                                                                                                                                                                                                                                                                                                                                                                                                                                                                                           |
| FTIR (thin film) $\text{cm}^{-1}$ :                       | 2964 (m), 1689 (m), 1498 (m), 1390 (m), 1176 (w).                                                                                                                                                                                                                                                                                                                                                                                                                                                                                                                                                                                                                                                                                                                                                                                                   |
| HRMS (ESI) ( $m/z$ ):                                     | calc'd for $\text{C}_{28}\text{H}_{30}\text{F}_2\text{N}_3\text{O}_7\text{S}_2$ $[\text{M}+\text{H}]^+$ : 622.1488, found: 622.1499.                                                                                                                                                                                                                                                                                                                                                                                                                                                                                                                                                                                                                                                                                                                |
| $[\alpha]_D^{24}$ :                                       | -46 ( $c = 0.35$ , $\text{CH}_2\text{Cl}_2$ ).                                                                                                                                                                                                                                                                                                                                                                                                                                                                                                                                                                                                                                                                                                                                                                                                      |
| TLC (33% acetone in hexanes), $R_f$ :                     | 0.26 (UV, CAM).                                                                                                                                                                                                                                                                                                                                                                                                                                                                                                                                                                                                                                                                                                                                                                                                                                     |

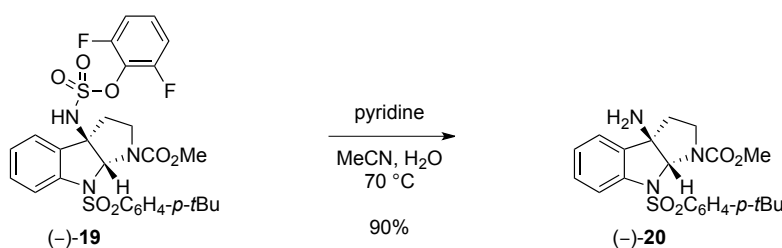

### **C3a-Aminohexahydropyrroloindole (-)-20:**

Pyridine (130  $\mu\text{L}$ , 1.61 mmol, 20.0 equiv) was added to a solution of hexahydropyrroloindole sulfamate ester (-)-**19** (50.0 mg, 80.0  $\mu\text{mol}$ , 1 equiv) in a mixture of acetonitrile–water (2:1, 900  $\mu\text{L}$ ) via syringe at 23  $^\circ\text{C}$ . The reaction flask was fitted with a reflux condenser and heated to 70  $^\circ\text{C}$ . After 24 h, the resulting yellow solution was allowed to cool to 23  $^\circ\text{C}$ . The mixture was diluted with dichloromethane (25 mL) and was washed with a saturated aqueous sodium bicarbonate solution (10 mL). The aqueous layer was extracted with dichloromethane ( $2 \times 15$  mL). The combined organic extracts were washed with brine (10 mL), were dried over anhydrous sodium sulfate, were filtered, and were concentrated under reduced pressure. The resulting residue was purified by flash column chromatography on silica gel (eluent: gradient, 2 $\rightarrow$ 5% methanol in dichloromethane) to afford the C3a-aminohexahydropyrroloindole (-)-**20** (31.0 mg, 90.2%) as a yellow oil.

As a result of the slow conformational equilibration at ambient temperature, NMR spectra were collected at elevated temperature. Structural assignments were made using additional information from gCOSY, HSQC, and HMBC experiments also collected at elevated temperature.

$^1\text{H}$  NMR (500 MHz,  $\text{CD}_3\text{CN}$ , 70  $^\circ\text{C}$ ):  $\delta$  7.75 (d,  $J = 8.5$  Hz, 2H,  $\text{N}_8\text{SO}_2\text{Ar-}o\text{-H}$ ), 7.55–7.53 (m, 3H,  $\text{N}_8\text{SO}_2\text{Ar-}m\text{-H}$ ,  $\text{C}_7\text{H}$ ), 7.34–7.29 (m, 2H,  $\text{C}_6\text{H}$ ,  $\text{C}_4\text{H}$ ), 7.17 (app-t,  $J = 7.5$  Hz, 1H,  $\text{C}_5\text{H}$ ), 5.71 (s, 1H,  $\text{C}_{8a}\text{H}$ ), 3.76 (app-t,  $J = 9.5$  Hz, 1H,  $\text{C}_2\text{H}_a$ ), 3.67 (s, 3H,  $\text{N}_1\text{CO}_2\text{CH}_3$ ), 2.80 (app-dt,  $J = 6.0, 11.1$  Hz, 1H,  $\text{C}_2\text{H}_b$ ), 2.14 (dd,  $J = 6.0, 12.5$  Hz, 1H,  $\text{C}_3\text{H}_a$ ), 2.07 (app-dt,  $J = 8.0, 11.0$  Hz, 1H,  $\text{C}_3\text{H}_b$ ), 1.43 (br-s, 2H,  $\text{NH}_2$ ), 1.30 (s, 9H,  $\text{C}(\text{CH}_3)_3$ ).

$^{13}\text{C}$  NMR (125.8 MHz,  $\text{CD}_3\text{CN}$ , 70  $^\circ\text{C}$ ):  $\delta$  159.3 ( $\text{N}_8\text{SO}_2\text{Ar-}p\text{-C}$ ), 156.8 ( $\text{N}_1\text{CO}_2\text{CH}_3$ ), 143.4 ( $\text{C}_{7a}$ ), 138.3 ( $\text{C}_{4a}$ ), 137.9 ( $\text{N}_8\text{SO}_2\text{Ar-}ipso\text{-C}$ ), 131.1 ( $\text{C}_6$ ), 129.0 ( $\text{N}_8\text{SO}_2\text{Ar-}o\text{-C}$ ), 127.9 ( $\text{N}_8\text{SO}_2\text{Ar-}m\text{-C}$ ), 127.0 ( $\text{C}_5$ ), 125.6 ( $\text{C}_4$ ), 118.6 ( $\text{C}_7$ ), 88.5 ( $\text{C}_{8a}$ ), 71.9 ( $\text{C}_{3a}$ ), 53.7 ( $\text{N}_1\text{CO}_2\text{CH}_3$ ), 47.4 ( $\text{C}_2$ ), 40.5 ( $\text{C}_3$ ), 36.7 ( $\text{C}(\text{CH}_3)_3$ ), 32.0 ( $\text{C}(\text{CH}_3)_3$ ).

FTIR (thin film)  $\text{cm}^{-1}$ : 3380 (br-w), 3316 (br-w), 2962 (m), 1710 (s), 1595 (w), 1448 (m), 1385 (m), 1197 (m).

HRMS (ESI) ( $m/z$ ): calc'd for  $\text{C}_{22}\text{H}_{27}\text{N}_3\text{NaO}_4\text{S}$  [ $\text{M}+\text{Na}$ ] $^+$ : 452.1614, found: 452.1633.

$[\alpha]_D^{24}$ :  $-175$  ( $c = 1.66$ ,  $\text{CH}_2\text{Cl}_2$ ).

TLC (50% acetone in hexanes),  $R_f$ : 0.24 (UV, CAM).

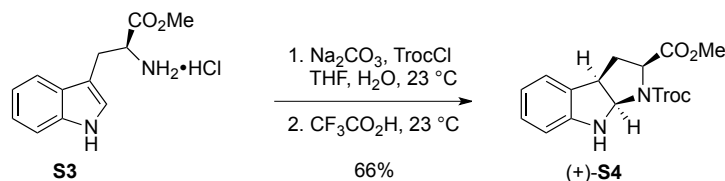

### **N1-Carboxytrichloroethyl Hexahydropyrroloindole (+)-S4:**

Sodium carbonate (8.30 g, 78.5 mmol, 2.00 equiv) was added in one portion as a solid to a solution of L-tryptophan methyl ester hydrochloride (**S3**) (10.0 g, 39.3 mmol, 1 equiv) in tetrahydrofuran–water (1:1, 400 mL) at 23 °C. After 10 min, 2,2,2-trichloroethyl chloroformate (7.00 mL, 51.0 mmol, 1.30 equiv) was added via syringe. After 1 h, tetrahydrofuran was removed under reduced pressure, and the resulting aqueous suspension was extracted with dichloromethane (3 × 300 mL). The combined organic extracts were washed with brine (100 mL), were dried over anhydrous sodium sulfate, were filtered, and were concentrated under reduced pressure to afford 2,2,2-trichloroethoxycarbonylated L-tryptophan methyl ester. The resulting tryptophan derivative was dissolved in trifluoroacetic acid (200 mL) and stirred at 23 °C. After 40 h, the homogenous solution was poured slowly into a vigorously stirred biphasic mixture of dichloromethane (200 mL) and aqueous sodium carbonate solution (10% w/v, 600 mL). The pH of the mixture was maintained above 7 by the periodic addition of solid sodium carbonate (5 × 50 g). Once the addition was complete, the mixture was extracted with dichloromethane (3 × 400 mL) and the combined organic layers were washed sequentially with water (100 mL) and brine (100 mL). The organic layer was separated, was dried over anhydrous sodium sulfate, was filtered, and was concentrated under reduced pressure. The resulting residue was purified by flash column chromatography on silica gel (eluent: 15→25% acetone in hexanes) to give N1-carboxytrichloroethyl hexahydropyrroloindole (**(+)-S4**)<sup>5</sup> (10.2 g, 65.9%) as a clear viscous oil. Structural assignments were made using additional information from gCOSY, HSQC, and HMBC experiments.

<sup>1</sup>H NMR (500 MHz, C<sub>6</sub>D<sub>6</sub>, 20 °C):

*Major Rotamer:* δ 6.89 (app-t, *J* = 7.5 Hz, 1H, C<sub>6</sub>H), 6.79–6.75 (m, 1H, C<sub>4</sub>H), 6.61 (app-t, *J* = 7.4 Hz, 1H, C<sub>5</sub>H), 6.25 (d, *J* = 7.7 Hz, 1H, C<sub>7</sub>H), 5.33 (d, *J* = 6.6 Hz, 1H, C<sub>8a</sub>H), 5.17 (br-s, 1H, N<sub>8</sub>H), 4.65 (d, *J* = 11.9 Hz, 1H, N<sub>1</sub>CO<sub>2</sub>CH<sub>a</sub>H<sub>b</sub>CCl<sub>3</sub>), 4.56–4.52 (m, 1H, N<sub>1</sub>CO<sub>2</sub>CH<sub>a</sub>H<sub>b</sub>CCl<sub>3</sub>), 4.38 (d, *J* = 8.7 Hz, 1H, C<sub>2</sub>H), 3.21 (app-t, *J* = 7.1 Hz, 1H, C<sub>3a</sub>H), 2.92 (s, 3H, CO<sub>2</sub>CH<sub>3</sub>), 2.27 (d, *J* = 13.2 Hz, 1H, C<sub>3</sub>H<sub>a</sub>), 1.83–1.74 (m, 1H, C<sub>3</sub>H<sub>b</sub>).

*Minor Rotamer:* δ 6.94 (app-t, *J* = 7.5 Hz, 1H, C<sub>6</sub>H), 6.79–6.75 (m, 1H, C<sub>4</sub>H), 6.64 (app-t, *J* = 7.4 Hz, 1H, C<sub>5</sub>H), 6.49 (d, *J* = 7.7 Hz, 1H, C<sub>7</sub>H), 5.31 (d, *J* =

<sup>5</sup> Due to facile opening of cyclotryptophan **S4** to the corresponding tryptophan derivative this material was used in the next step immediately following purification.

6.6 Hz, 1H, C<sub>8a</sub>H), 4.99 (br-s, 1H, N<sub>8</sub>H), 4.65 (d,  $J = 11.9$  Hz, 1H, N<sub>1</sub>CO<sub>2</sub>CH<sub>a</sub>H<sub>b</sub>CCl<sub>3</sub>) 4.56–4.52 (m, 1H N<sub>1</sub>CO<sub>2</sub>CH<sub>a</sub>H<sub>b</sub>CCl<sub>3</sub>), 4.50 (d,  $J = 8.7$  Hz, 1H, C<sub>2</sub>H), 3.29 (app-t,  $J = 7.1$  Hz, 1H, C<sub>3a</sub>H), 2.89 (s, 3H, CO<sub>2</sub>CH<sub>3</sub>), 2.28 (d,  $J = 13.2$  Hz, 1H, C<sub>3</sub>H<sub>a</sub>), 1.83–1.74 (m, 1H, C<sub>3</sub>H<sub>b</sub>).

<sup>13</sup>C NMR (125.8 MHz, C<sub>6</sub>D<sub>6</sub>, 20 °C):

*Major Rotamer:*  $\delta$  171.5 (CO<sub>2</sub>CH<sub>3</sub>), 153.2 (N<sub>1</sub>CO<sub>2</sub>CH<sub>2</sub>CCl<sub>3</sub>), 150.9 (C<sub>7a</sub>), 129.1 (C<sub>6</sub>), 128.7 (C<sub>4a</sub>), 124.5 (C<sub>4</sub>), 119.2 (C<sub>5</sub>), 109.7 (C<sub>7</sub>), 96.3 (N<sub>1</sub>CO<sub>2</sub>CH<sub>2</sub>CCl<sub>3</sub>), 78.3 (C<sub>8a</sub>), 75.2 (N<sub>1</sub>CO<sub>2</sub>CH<sub>2</sub>CCl<sub>3</sub>), 59.7 (C<sub>2</sub>), 52.1 (CO<sub>2</sub>CH<sub>3</sub>), 45.6 (C<sub>3a</sub>), 34.8 (C<sub>3</sub>).

*Minor Rotamer:*  $\delta$  171.2 (CO<sub>2</sub>CH<sub>3</sub>), 152.4 (N<sub>1</sub>CO<sub>2</sub>CH<sub>2</sub>CCl<sub>3</sub>), 150.6 (C<sub>7a</sub>), 129.3 (C<sub>6</sub>), 128.9 (C<sub>4a</sub>), 124.7 (C<sub>4</sub>), 119.8 (C<sub>5</sub>), 109.5 (C<sub>7</sub>), 96.5 (N<sub>1</sub>CO<sub>2</sub>CH<sub>2</sub>CCl<sub>3</sub>), 77.7 (C<sub>8a</sub>), 75.2 (N<sub>1</sub>CO<sub>2</sub>CH<sub>2</sub>CCl<sub>3</sub>), 60.2 (C<sub>2</sub>), 52.1 (CO<sub>2</sub>CH<sub>3</sub>), 46.6 (C<sub>3a</sub>), 34.1 (C<sub>3</sub>).

FTIR (thin film) cm<sup>-1</sup>:

3384 (br-w), 2951 (w), 1718 (s), 1610 (w), 1414 (m).

HRMS (ESI) ( $m/z$ ):

calc'd for C<sub>15</sub>H<sub>16</sub>Cl<sub>3</sub>N<sub>2</sub>O<sub>4</sub> [M+H]<sup>+</sup>: 393.0170, found: 393.0180.

[ $\alpha$ ]<sub>D</sub><sup>24</sup>:

+168 ( $c = 0.58$ , CH<sub>2</sub>Cl<sub>2</sub>).

TLC (33% acetone in hexanes), R<sub>f</sub>:

0.34 (UV, CAM).

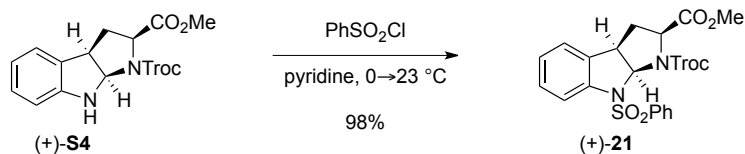

### **C2-Carboxymethyl Hexahydropyrroloindole (+)-21:**

Benzenesulfonyl chloride (6.10 mL, 47.8 mmol, 2.00 equiv) was added dropwise via syringe to a solution of N1-carboxytrichloroethyl hexahydropyrroloindole (+)-**S4** (9.40 g, 23.9 mmol, 1 equiv) in pyridine (40 mL) at 0 °C in an ice bath. After 15 min, the ice bath was removed and allowed to warm to 23 °C. After 15 h, the solution was concentrated under reduced pressure. The resulting residue was diluted with ethyl acetate (750 mL) and washed sequentially with an aqueous solution of hydrochloric acid (1 N, 2 × 50 mL), saturated aqueous solution of sodium bicarbonate (50 mL), and brine (100 mL). The organic layer was separated, was dried over anhydrous sodium sulfate, was filtered, and was concentrated under reduced pressure. The resulting residue was purified by flash column chromatography on silica gel (eluent: 25→50% ethyl acetate in hexanes) to give C2-carboxymethyl hexahydropyrroloindole (+)-**21** (12.5 g, 97.9%) as a white foam.

As a result of the slow conformational equilibration at ambient temperature, NMR spectra were collected at elevated temperature. Structural assignments were made using additional information from gCOSY, HSQC, and HMBC experiments also collected at elevated temperature.

<sup>1</sup>H NMR (500 MHz, CD<sub>3</sub>CN, 70 °C): δ 7.72 (d, *J* = 8.3 Hz, 2H, N<sub>8</sub>SO<sub>2</sub>Ph-*o*-H), 7.57 (t, *J* = 7.8 Hz, 1H, N<sub>8</sub>SO<sub>2</sub>Ph-*p*-H), 7.45–7.40 (m, 3H, C<sub>7</sub>H, N<sub>8</sub>SO<sub>2</sub>Ph-*m*-H), 7.25 (app-t, *J* = 8.3 Hz, 1H, C<sub>6</sub>H), 7.09 (m, 2H, C<sub>4</sub>H, C<sub>5</sub>H), 6.38 (d, *J* = 6.4 Hz, 1H, C<sub>8a</sub>H), 4.86 (d, *J* = 12.1 Hz, 1H, N<sub>1</sub>CO<sub>2</sub>CH<sub>a</sub>H<sub>b</sub>CCl<sub>3</sub>) 4.71 (d, *J* = 10.5 Hz, 1H, N<sub>1</sub>CO<sub>2</sub>CH<sub>a</sub>H<sub>b</sub>CCl<sub>3</sub>), 4.64 (d, *J* = 9.1 Hz, 1H, C<sub>2</sub>H), 3.70 (app-t, *J* = 7.0 Hz, 1H, C<sub>3a</sub>H), 3.15 (s, 3H, CO<sub>2</sub>CH<sub>3</sub>), 2.61 (ddd, *J* = 7.5, 9.1, 13.4 Hz, 1H, C<sub>3</sub>H<sub>a</sub>), 2.52 (d, *J* = 13.4 Hz, 1H, C<sub>3</sub>H<sub>b</sub>).

<sup>13</sup>C NMR (125.8 MHz, CD<sub>3</sub>CN, 70 °C): δ 172.7 (CO<sub>2</sub>CH<sub>3</sub>), 154.0<sup>6</sup> (N<sub>1</sub>CO<sub>2</sub>CH<sub>2</sub>CCl<sub>3</sub>), 144.1 (C<sub>7a</sub>), 140.8 (N<sub>8</sub>SO<sub>2</sub>Ph-*ipso*-C), 135.9 (C<sub>4a</sub>), 135.0 (N<sub>8</sub>SO<sub>2</sub>Ph-*p*-C), 130.8 (N<sub>8</sub>SO<sub>2</sub>Ph-*m*-C), 130.4 (C<sub>6</sub>), 128.9 (N<sub>8</sub>SO<sub>2</sub>Ph-*o*-C), 127.3 (C<sub>5</sub>), 126.4 (C<sub>4</sub>), 120.0 (C<sub>7</sub>), 97.3 (N<sub>1</sub>CO<sub>2</sub>CH<sub>2</sub>CCl<sub>3</sub>), 82.9 (C<sub>8a</sub>), 76.7 (N<sub>1</sub>CO<sub>2</sub>CH<sub>2</sub>CCl<sub>3</sub>), 61.1 (C<sub>2</sub>), 53.2 (CO<sub>2</sub>CH<sub>3</sub>), 47.1 (C<sub>3a</sub>), 35.2 (C<sub>3</sub>).

FTIR (thin film) cm<sup>-1</sup>: 2952 (w), 1731 (s), 1404 (m), 1357 (m), 1170 (m).

<sup>6</sup> Not observed directly in simple <sup>13</sup>C NMR. Assigned based on HMBC correlation to NCO<sub>2</sub>CH<sub>a</sub>H<sub>b</sub>CCl<sub>3</sub>.

HRMS (ESI) ( $m/z$ ): calc'd for  $C_{21}H_{20}Cl_3N_2O_6S$   $[M+H]^+$ : 533.0102,  
found: 533.0107.

$[\alpha]_D^{24}$ : +93 ( $c = 0.41$ ,  $CH_2Cl_2$ ).

TLC (50% ethyl acetate in hexanes),  $R_f$ : 0.47 (UV, CAM).

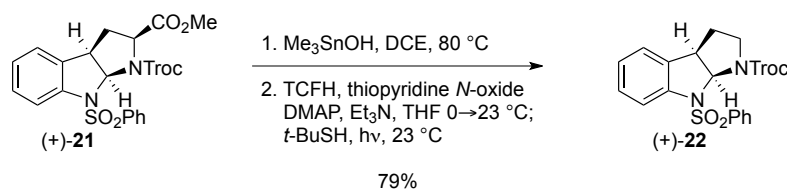

### **N8-Benzenesulfonyl Hexahydropyrroloindole (+)-22:**

Trimethyltin hydroxide<sup>7</sup> (9.50 g, 52.5 mmol, 8.00 equiv) was added to a solution of C2-carboxymethyl hexahydropyrroloindole (+)-**21** (3.50 g, 6.55 mmol, 1 equiv) in dichloroethane (65 mL) at 23 °C. The reaction flask was fitted with a reflux condenser and heated to 80 °C. After 48 h, the heterogeneous mixture was allowed to cool to 23 °C and was concentrated under reduced pressure. The resulting residue was diluted with ethyl acetate (600 mL) and was washed with aqueous hydrochloric acid solution (1 N, 3 × 100 mL), brine (50 mL), the organic layer was separated, was dried over anhydrous sodium sulfate, was filtered and was concentrated under reduced pressure. The resulting residue was filtered through a pad of silica gel (eluent: 5% methanol in dichloromethane→5% acetic acid in dichloromethane) to remove excess trimethyltin hydroxide. The filtrate was concentrated under reduced pressure to provide the crude carboxylic acid.

Thiopyridine *N*-oxide (1.33 g, 10.5 mmol, 1.60 equiv), 4-(dimethylamino)pyridine (80.0 mg, 650 μmol, 0.100 equiv), and *N,N,N,N'*-tetramethylchloroformamidinium hexafluorophosphate (TCFH, 2.75 g, 9.81 mmol, 1.50 equiv) were sequentially added to a solution of the crude carboxylic acid in tetrahydrofuran (65 mL) at 0 °C in an ice bath. The reaction flask was removed from the ice bath, covered in aluminum foil, and triethylamine (3.65 mL, 26.2 mmol, 4.00 equiv) was added while the reaction mixture was still cold. After 1.5 h, *tert*-butylthiol (3.70 mL, 32.7 mmol, 5.00 equiv) was added via syringe and the aluminum foil was removed from the flask. The resulting suspension was irradiated with a flood lamp (500 W). After 2 h, the lamp was turned off and the tetrahydrofuran was removed under reduced pressure. The resulting residue was diluted with dichloromethane (200 mL) and was washed with aqueous saturated sodium bicarbonate solution (50 mL). The aqueous layer was extracted with dichloromethane (2 × 100 mL). The combined organic extracts were washed with brine (50 mL), were dried over anhydrous sodium sulfate, were filtered, and were concentrated under reduced pressure. The resulting residue was purified by flash column chromatography on silica gel (eluent: gradient, 10→33% ethyl acetate in hexanes) to give N8-benzenesulfonyl hexahydropyrroloindole (+)-**22** (2.47 g, 79.3%, overall from (+)-**21**) as a white foam.

As a result of the slow conformational equilibration at ambient temperature, NMR spectra were collected at elevated temperature. Structural assignments were made using additional information from gCOSY, HSQC, and HMBC experiments also collected at elevated temperature.

<sup>1</sup>H NMR (500 MHz, CD<sub>3</sub>CN, 70 °C): δ 7.74 (d, *J* = 7.8 Hz, 2H, N<sub>8</sub>SO<sub>2</sub>Ph-*o*-H), 7.59 (t, *J* = 7.5 Hz, 1H, N<sub>8</sub>SO<sub>2</sub>Ph-*p*-H) 7.52 (d, *J* = 8.1 Hz, 1H, C<sub>7</sub>H) 7.45 (t, *J* = 7.3 Hz, 2H, N<sub>8</sub>SO<sub>2</sub>Ph-*m*-H),

<sup>7</sup> All operations involving trimethyltin hydroxide were carried out in a well-ventilated fume hood. This includes but is not limited to: measuring out the reagent, execution of the transformation, work-up of the reaction mixture, and concentration of the crude reaction mixture.



|                                                             |                                                                                                                                                                                                                                                                                                                                                                                                                                                                                                                                                                                                                                                                                                              |
|-------------------------------------------------------------|--------------------------------------------------------------------------------------------------------------------------------------------------------------------------------------------------------------------------------------------------------------------------------------------------------------------------------------------------------------------------------------------------------------------------------------------------------------------------------------------------------------------------------------------------------------------------------------------------------------------------------------------------------------------------------------------------------------|
|                                                             | 7.27 (app-t, $J = 7.3$ Hz, 1H, C <sub>6</sub> H), 7.18–7.12 (m, 2H, C <sub>4</sub> H, C <sub>5</sub> H), 6.34 (d, $J = 6.7$ Hz, 1H, C <sub>8a</sub> H), 4.90–4.82 (m, 2H, N <sub>1</sub> CO <sub>2</sub> CH <sub>2</sub> CCl <sub>3</sub> ), 3.85 (dd, $J = 8.3, 10.6$ Hz, 1H, C <sub>2</sub> H <sub>a</sub> ), 3.73 (app-t, $J = 7.1$ Hz, 1H, C <sub>3a</sub> H), 2.85 (app-dt, $J = 5.7, 11.4$ Hz, 1H, C <sub>2</sub> H <sub>b</sub> ), 2.23–2.14 (m, 1H, C <sub>3</sub> H <sub>a</sub> ), 2.04 (dd, $J = 5.6, 12.7$ Hz, 1H, C <sub>3</sub> H <sub>b</sub> ).                                                                                                                                              |
| <sup>13</sup> C NMR (125.8 MHz, CD <sub>3</sub> CN, 70 °C): | δ 154.3 (N <sub>1</sub> CO <sub>2</sub> CH <sub>2</sub> CCl <sub>3</sub> ), 143.7 (C <sub>7a</sub> ), 140.4 (N <sub>8</sub> SO <sub>2</sub> Ph- <i>ipso</i> -C), 135.8 (C <sub>4a</sub> ), 135.1 (NSO <sub>2</sub> Ph- <i>p</i> -C), 130.9 (N <sub>8</sub> SO <sub>2</sub> Ph- <i>m</i> -C), 130.2 (C <sub>6</sub> ), 129.0 (N <sub>8</sub> SO <sub>2</sub> Ph- <i>o</i> -C), 127.3 (C <sub>5</sub> ), 126.4 (C <sub>4</sub> ), 119.0 (C <sub>7</sub> ), 97.7 (N <sub>1</sub> CO <sub>2</sub> CH <sub>2</sub> CCl <sub>3</sub> ), 82.1 (C <sub>8a</sub> ), 76.6 (N <sub>1</sub> CO <sub>2</sub> CH <sub>2</sub> CCl <sub>3</sub> ), 47.6 (C <sub>3a</sub> ), 46.9 (C <sub>2</sub> ), 37.3 (C <sub>3</sub> ). |
| FTIR (thin film) cm <sup>-1</sup> :                         | 2952 (w), 1728 (s), 1407 (m), 1358 (m), 1173 (m).                                                                                                                                                                                                                                                                                                                                                                                                                                                                                                                                                                                                                                                            |
| HRMS (ESI) ( $m/z$ ):                                       | calc'd for C <sub>19</sub> H <sub>18</sub> Cl <sub>3</sub> N <sub>2</sub> O <sub>4</sub> S [M+H] <sup>+</sup> : 475.0047, found: 475.0051.                                                                                                                                                                                                                                                                                                                                                                                                                                                                                                                                                                   |
| [α] <sub>D</sub> <sup>24</sup> :                            | +183 ( $c = 0.43$ , CH <sub>2</sub> Cl <sub>2</sub> ).                                                                                                                                                                                                                                                                                                                                                                                                                                                                                                                                                                                                                                                       |
| TLC (50% ethyl acetate in hexanes), R <sub>f</sub> :        | 0.58 (UV, CAM).                                                                                                                                                                                                                                                                                                                                                                                                                                                                                                                                                                                                                                                                                              |

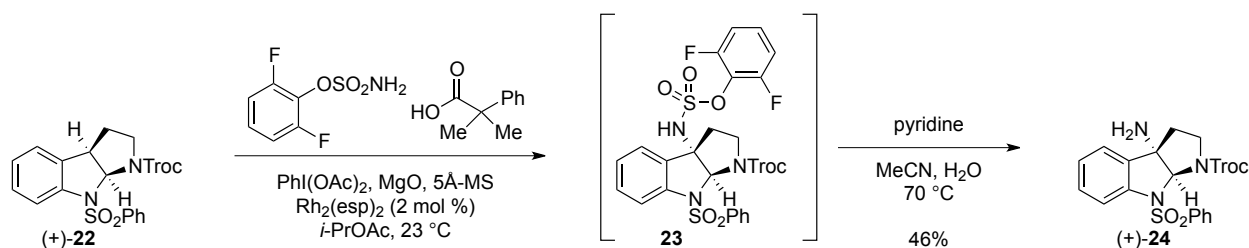

### C3a-Aminohexahydropyrroloindole (+)-**24**:

A round bottom flask was charged with 5 Å molecular sieves (210 mg, 200 mg/mmol of **22**), magnesium oxide (169 mg, 4.20 mmol, 4.00 equiv) and flame-dried under vacuum. The reaction vessel was allowed to cool to 23 °C and back filled with argon. Solid 2,6-difluorophenyl sulfamate<sup>4</sup> (287 mg, 1.37 mmol, 1.30 equiv), 2-methyl-2-phenylpropionic acid (86.0 mg, 526 μmol, 0.500 equiv), and  $\text{Rh}_2(\text{esp})_2$  (16.0 mg, 21.0 μmol, 0.0200 equiv) were added sequentially. A solution of N8-benzenesulfonyl hexahydropyrroloindole (+)-**22** (500 mg, 1.05 mmol, 1 equiv) in isopropyl acetate (2.0 mL) was added at 23 °C and the mixture was allowed to stir. After 5 min, (diacetoxyiodo)benzene (676 mg, 2.10 mmol, 2.00 equiv) was added and the green heterogeneous mixture was vigorously agitated with stirring at 23 °C. After 24 h, the reaction mixture was filtered through a pad of Celite and the filter cake was rinsed with ethyl acetate (40 mL). The filtrate was concentrated under reduced pressure. The residue was diluted with dichloromethane (50 mL) and washed with a saturated solution of sodium thiosulfate (10 mL). The aqueous layer was then extracted with dichloromethane (2 × 30 mL). The combined organic extracts were washed with brine (25 mL), were dried over anhydrous sodium sulfate, were filtered, and were concentrated under reduced pressure.

The resulting crude aryl sulfamate ester **23** was dissolved in a mixture of acetonitrile–water (2:1, 21 mL). Pyridine (1.70 mL, 21.0 mmol, 20.0 equiv) was added via syringe at 23 °C. The reaction flask was fitted with a reflux condenser and heated to 70 °C. After 24 h, the resulting dark brown solution was allowed to cool to 23 °C. The mixture was diluted with dichloromethane (50 mL) and was washed with a saturated aqueous solution of sodium bicarbonate (20 mL). The aqueous layer was extracted with dichloromethane (2 × 30 mL). The combined organic extracts were washed with brine (25 mL), were dried over anhydrous sodium sulfate, were filtered, and were concentrated under reduced pressure. The resulting residue was purified by flash column chromatography on silica gel (eluent: gradient, 15→ 33% acetone in hexane) to afford the C3a-aminohexahydropyrroloindole (+)-**24** (235 mg, 45.7%, overall from (+)-**22**) as an orange foam.

As a result of the slow conformational equilibration at ambient temperature, NMR spectra were collected at elevated temperature. Structural assignments were made using additional information from gCOSY, HSQC, and HMBC experiments also collected at elevated temperature.

<sup>1</sup>H NMR (500 MHz,  $\text{CD}_3\text{CN}$ , 70 °C):  $\delta$  7.86 (d,  $J = 7.9$  Hz, 2H,  $\text{N}_8\text{SO}_2\text{Ph-}o\text{-H}$ ), 7.61 (t,  $J = 7.8$  Hz, 1H,  $\text{N}_8\text{SO}_2\text{Ph-}p\text{-H}$ ), 7.55 (d,  $J = 8.1$  Hz, 1H,  $\text{C}_7\text{H}$ ), 7.49 (t,  $J = 7.4$  Hz, 2H,  $\text{N}_8\text{SO}_2\text{Ph-}m\text{-H}$ ), 7.35–7.31 (m, 2H,  $\text{C}_6\text{H}$ ,  $\text{C}_4\text{H}$ ), 7.18 (app-t,  $J = 7.5$  Hz, 1H,  $\text{C}_3\text{H}$ ), 5.82 (s, 1H,  $\text{C}_{8a}\text{H}$ ), 4.88 (br-s, 1H,  $\text{N}_1\text{CO}_2\text{CH}_a\text{H}_b\text{CCl}_3$ ), 4.81 (d,  $J = 10.9$  Hz, 1H,

$\text{N}_1\text{CO}_2\text{CH}_a\text{H}_b\text{CCl}_3$ , 3.90 (app-t,  $J = 9.5$  Hz, 1H,  $\text{C}_2\text{H}_a$ ), 2.91 (app-dt,  $J = 6.0, 11.1$  Hz, 1H,  $\text{C}_2\text{H}_b$ ), 2.19 (dd,  $J = 6.0, 12.5$  Hz, 1H,  $\text{C}_3\text{H}_a$ ), 2.11 (app-dt,  $J = 8.0, 11.4$  Hz, 1H,  $\text{C}_3\text{H}_b$ ) 1.47 (br-s, 2H,  $\text{NH}_2$ ).

$^{13}\text{C}$  NMR (125.8 MHz,  $\text{CD}_3\text{CN}$ , 70 °C):  $\delta$  154.6 ( $\text{N}_1\text{CO}_2\text{CH}_2\text{CCl}_3$ ), 143.2 ( $\text{C}_{7a}$ ), 140.5 ( $\text{N}_8\text{SO}_2\text{Ph-}i\text{ps}o\text{-C}$ ), 137.9 ( $\text{C}_{4a}$ ), 135.3 ( $\text{N}_8\text{SO}_2\text{Ph-}p\text{-C}$ ), 131.3 ( $\text{C}_6$ ), 131.0 ( $\text{N}_8\text{SO}_2\text{Ph-}m\text{-C}$ ), 129.2 ( $\text{N}_8\text{SO}_2\text{Ph-}o\text{-C}$ ), 127.2 ( $\text{C}_5$ ), 125.8 ( $\text{C}_4$ ), 118.3 ( $\text{C}_7$ ), 97.7 ( $\text{N}_1\text{CO}_2\text{CH}_2\text{CCl}_3$ ), 88.5 ( $\text{C}_{8a}$ ), 76.6 ( $\text{N}_1\text{CO}_2\text{CH}_2\text{CCl}_3$ ), 71.8 ( $\text{C}_{3a}$ ), 47.8 ( $\text{C}_2$ ), 40.8 ( $\text{C}_3$ ).

FTIR (thin film)  $\text{cm}^{-1}$ : 2953 (w), 1733 (s), 1407 (m), 1361 (m), 1171 (w).

HRMS (ESI) ( $m/z$ ): calc'd for  $\text{C}_{19}\text{H}_{19}\text{Cl}_3\text{N}_3\text{O}_4\text{S}$   $[\text{M}+\text{H}]^+$ : 490.0156, found: 490.0139.

$[\alpha]_D^{24}$ : +164 ( $c = 0.48$ ,  $\text{CH}_2\text{Cl}_2$ ).

TLC (33% acetone in hexanes),  $R_f$ : 0.16 (UV, CAM).

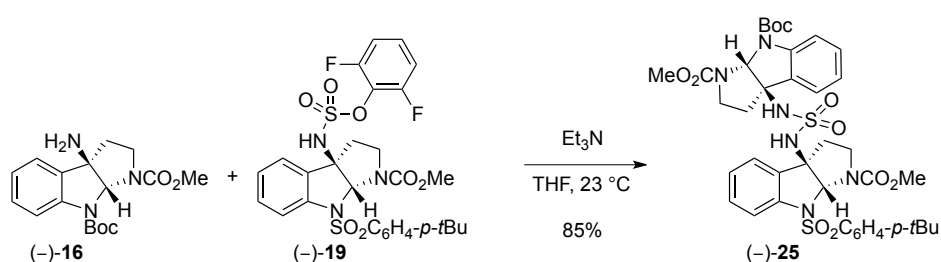

### Mixed Sulfamide (–)-25:

Triethylamine (82.0  $\mu\text{L}$ , 587  $\mu\text{mol}$ , 2.20 equiv) was added via syringe to a solution of C3a-aminohexahydropyrroloindole (–)-16 (89.0 mg, 267  $\mu\text{mol}$ , 1 equiv) and hexahydropyrroloindole sulfamate ester (–)-19 (200 mg, 320  $\mu\text{mol}$ , 1.20 equiv) in tetrahydrofuran (2.00 mL) at 23  $^\circ\text{C}$ . After 24 h, the clear solution was concentrated under reduced pressure. The resulting residue was purified by flash column chromatography on silica gel (eluent: 33% ethyl acetate in hexanes then 25% acetone in hexanes) to afford the mixed sulfamide (–)-25 (187 mg, 84.9%) as a white solid.

As a result of the slow conformational equilibration at ambient temperature, NMR spectra were collected at elevated temperature. Structural assignments were made using additional information from gCOSY, HSQC, and HMBC experiments also collected at elevated temperature.

$^1\text{H}$  NMR (500 MHz,  $\text{C}_6\text{D}_6$ , 70  $^\circ\text{C}$ ):

$\delta$  8.05 (d,  $J = 8.2\text{Hz}$ , 1H,  $\text{C}_7\text{H}$ ), 7.94 (br-s, 2H,  $\text{N}_8\text{SO}_2\text{Ar-}o\text{-H}$ ), 7.74 (d,  $J = 8.1\text{Hz}$ , 1H,  $\text{C}_7\text{H}$ ), 7.14 (d,  $J = 8.5\text{ Hz}$ , 2H,  $\text{N}_8\text{SO}_2\text{Ar-}m\text{-H}$ ), 7.08–7.00 (m, 2H,  $\text{C}_6\text{H}$ ,  $\text{C}_6\text{H}$ ), 6.95 (d,  $J = 5.6\text{ Hz}$ , 1H,  $\text{C}_4\text{H}$ ), 6.91 (s, 1H,  $\text{C}_{8a}\text{H}$ ), 6.73 (app-t,  $J = 7.5\text{ Hz}$ , 1H,  $\text{C}_5\text{H}$ ), 6.66 (d,  $J = 6.6\text{ Hz}$ , 1H,  $\text{C}_4\text{H}$ ), 6.61 (s, 1H,  $\text{C}_{8a}\text{H}$ ), 6.53 (br-s, 1H,  $\text{C}_5\text{H}$ ), 5.15 (br-s, 1H,  $\text{SO}_2\text{NH}$ ), 3.84 (br-s, 1H,  $\text{SO}_2\text{NH}$ ), 3.80–3.67 (m, 2H,  $\text{C}_2\text{H}_a$ ,  $\text{C}_2\text{H}_a$ ), 3.51 (s, 3H,  $\text{N}_1\text{CO}_2\text{CH}_3$ ), 3.44 (s, 3H,  $\text{N}_1\text{CO}_2\text{CH}_3$ ), 2.66–2.54 (m, 3H,  $\text{C}_2\text{H}_b$ ,  $\text{C}_2\text{H}_b$ ,  $\text{C}_3\text{H}_a$ ), 2.14–2.07 (m, 2H,  $\text{C}_3\text{H}_a$ ,  $\text{C}_3\text{H}_b$ ), 1.79 (d,  $J = 7.1\text{Hz}$ , 1H,  $\text{C}_3\text{H}_b$ ), 1.58 (s, 9H,  $\text{N}_1\text{CO}_2\text{C}(\text{CH}_3)_3$ ), 1.04 (s, 9H,  $\text{C}(\text{CH}_3)_3$ ).

$^{13}\text{C}$  NMR (125.8 MHz,  $\text{C}_6\text{D}_6$ , 70  $^\circ\text{C}$ ):

$\delta$  157.5 ( $\text{N}_8\text{SO}_2\text{Ar-}p\text{-C}$ ), 155.7 ( $\text{N}_1\text{CO}_2\text{CH}_3$ ), 155.5 ( $\text{N}_1\text{CO}_2\text{CH}_3$ ), 153.3 ( $\text{N}_8\text{CO}_2\text{C}(\text{CH}_3)_3$ ), 145.5 ( $\text{C}_{7a}$ ), 143.3 ( $\text{C}_{7a}$ ), 138.2 ( $\text{N}_8\text{SO}_2\text{Ar-}ipso\text{-C}$ ), 132.8 ( $\text{C}_{4a}$ ), 130.9 ( $\text{C}_6$ ), 130.8 ( $\text{C}_6$ ), 129.5 ( $\text{C}_{4a}$ ), 128.0 ( $\text{N}_8\text{SO}_2\text{Ar-}o\text{-C}$ ), 126.7 ( $\text{N}_8\text{SO}_2\text{Ar-}m\text{-C}$ ), 125.3 ( $\text{C}_5$ ), 124.8 ( $\text{C}_4$ ), 124.5 ( $\text{C}_{4'}$ ), 123.5 ( $\text{C}_5'$ ), 118.4 ( $\text{C}_7$ ), 117.5 ( $\text{C}_7'$ ), 82.5 ( $\text{C}_{8a}$ ), 82.0 ( $\text{N}_8\text{CO}_2\text{C}(\text{CH}_3)_3$ ), 81.6 ( $\text{C}_{8a}'$ ), 72.9 ( $\text{C}_{3a}$ ), 72.0 ( $\text{C}_{3a}$ ), 52.9 ( $\text{N}_1\text{CO}_2\text{CH}_3$ ), 52.6 ( $\text{N}_1\text{CO}_2\text{CH}_3$ ), 45.4 ( $\text{C}_2$ ), 45.2 ( $\text{C}_2'$ ), 37.8 ( $\text{C}_3'$ ), 37.3 ( $\text{C}_3$ ), 35.4 ( $\text{C}(\text{CH}_3)_3$ ), 31.3 ( $\text{C}(\text{CH}_3)_3$ ), 28.8 ( $\text{N}_8\text{CO}_2\text{C}(\text{CH}_3)_3$ ).

|                                       |                                                                                                                                  |
|---------------------------------------|----------------------------------------------------------------------------------------------------------------------------------|
| FTIR (thin film) $\text{cm}^{-1}$ :   | 3242 (br-m), 2960 (m), 1713 (s), 1480 (m), 1448 (m), 1392 (m), 1167 (w).                                                         |
| HRMS (ESI) ( $m/z$ ):                 | calc'd for $\text{C}_{39}\text{H}_{48}\text{N}_6\text{NaO}_{10}\text{S}_2$ $[\text{M}+\text{Na}]^+$ : 847.2766, found: 847.2767. |
| $[\alpha]_{\text{D}}^{24}$ :          | -111 ( $c = 0.66$ , $\text{CH}_2\text{Cl}_2$ ).                                                                                  |
| TLC (33% acetone in hexanes), $R_f$ : | 0.25 (UV, CAM).                                                                                                                  |

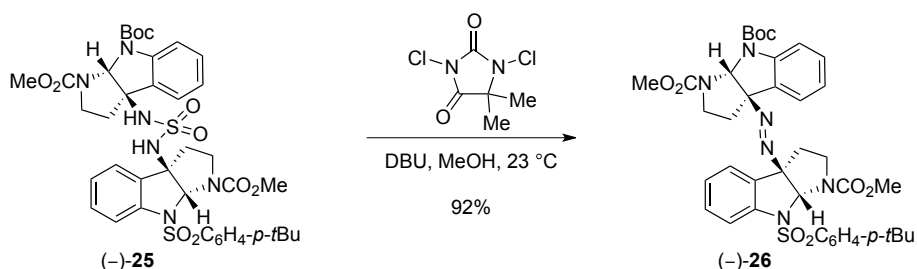

### Unsymmetrical Diazene (–)-26:

1,8-Diazabicyclo[5.4.0]undec-7-ene (DBU, 152  $\mu$ L, 1.02 mmol, 5.00 equiv), was added via syringe to a solution of mixed sulfamide (–)-**25** (169 mg, 205  $\mu$ mol, 1 equiv) in methanol (15.0 mL) at 23 °C. After 5 min, a solution of 1,3-dichloro-5,5-dimethylhydantoin (101 mg, 513  $\mu$ mol, 2.50 equiv) in methanol (5.00 mL) was added via syringe over 1 min at 23 °C. After 30 min, the clear solution was concentrated under reduced pressure. The resulting residue was purified by flash column chromatography on silica gel (eluent: 10 $\rightarrow$ 20% acetone in hexanes) to afford unsymmetrical diazene (–)-**26** (143 mg, 91.9%) as a white foam.

As a result of the slow conformational equilibration at ambient temperature, NMR spectra were collected at elevated temperature. Structural assignments were made using additional information from gCOSY, HSQC, and HMBC experiments also collected at elevated temperature.

$^1\text{H}$  NMR (500 MHz,  $\text{CD}_3\text{CN}$ , 50 °C):

$\delta$  7.72 (d,  $J$  = 8.5 Hz, 2H,  $\text{N}_8\text{SO}_2\text{Ar-}o\text{-H}$ ), 7.68 (d,  $J$  = 8.2 Hz, 1H,  $\text{C}_7\text{H}$ ), 7.50 (d,  $J$  = 8.2 Hz, 1H,  $\text{C}_7\text{H}$ ), 7.46 (d,  $J$  = 8.5 Hz, 2H,  $\text{N}_8\text{SO}_2\text{Ar-}m\text{-H}$ ), 7.35–7.29 (m, 2H,  $\text{C}_6\text{H}$ ,  $\text{C}_6\text{H}$ ), 7.13–6.97 (m, 4H,  $\text{C}_4\text{H}$ ,  $\text{C}_4\text{H}$ ,  $\text{C}_5\text{H}$ ,  $\text{C}_5\text{H}$ ), 6.64 (s, 1H,  $\text{C}_{8a}\text{H}$ ), 6.51 (s, 1H,  $\text{C}_{8a}\text{H}$ ), 3.92–3.85 (m, 2H,  $\text{C}_2\text{H}_a$ ,  $\text{C}_2\text{H}_a$ ), 3.69 (s, 3H,  $\text{N}_1\text{CO}_2\text{CH}_3$ ), 3.66 (s, 3H,  $\text{N}_1\text{CO}_2\text{CH}_3$ ), 3.00–2.90 (m, 2H,  $\text{C}_2\text{H}_b$ ,  $\text{C}_2\text{H}_b$ ), 2.28 (app-t,  $J$  = 5.1 Hz, 1H,  $\text{C}_3\text{H}_a$ ), 2.26 (app-t,  $J$  = 5.1 Hz, 1H,  $\text{C}_3\text{H}_a$ ), 2.18 (app-dt,  $J$  = 8.0, 11.9 Hz, 1H,  $\text{C}_3\text{H}_b$ ), 2.10 (app-dt,  $J$  = 8.2, 12.3 Hz, 1H,  $\text{C}_3\text{H}_b$ ), 1.54 (s, 9H,  $\text{N}_1\text{CO}_2\text{C}(\text{CH}_3)_3$ ), 1.26 (s, 9H,  $\text{C}(\text{CH}_3)_3$ ).

$^{13}\text{C}$  NMR (125.8 MHz,  $\text{CD}_3\text{CN}$ , 50 °C):

$\delta$  159.0 ( $\text{N}_8\text{SO}_2\text{Ar-}p\text{-C}$ ), 156.6 ( $\text{N}_1\text{CO}_2\text{CH}_3$ ), 156.2 ( $\text{N}_1\text{CO}_2\text{CH}_3$ ), 153.8 ( $\text{N}_8\text{CO}_2\text{C}(\text{CH}_3)_3$ ), 145.3 ( $\text{C}_{7a}$ ), 144.0 ( $\text{C}_{7a}$ ), 137.5 ( $\text{N}_8\text{SO}_2\text{Ar-}ipso\text{-C}$ ), 131.9 ( $\text{C}_6$ ), 131.7 ( $\text{C}_{6'}$ ), 131.4 ( $\text{C}_{4a}$ ), 130.6 ( $\text{C}_{4a'}$ ), 129.0 ( $\text{N}_8\text{SO}_2\text{Ar-}o\text{-C}$ ), 127.7 ( $\text{N}_8\text{SO}_2\text{Ar-}m\text{-C}$ ), 127.0 ( $\text{C}_4$ ), 126.4 ( $\text{C}_5$ ), 126.3 ( $\text{C}_{4'}$ ), 125.1 ( $\text{C}_5'$ ), 118.2 ( $\text{C}_7$ ), 117.4 ( $\text{C}_7$ ), 90.6 ( $\text{C}_{3a}$ ), 89.9 ( $\text{C}_{3a'}$ ), 83.2 ( $\text{N}_8\text{CO}_2\text{C}(\text{CH}_3)_3$ ), 83.0 ( $\text{C}_{8a}$ ), 80.0 ( $\text{C}_{8a'}$ ), 53.8 ( $\text{N}_1\text{CO}_2\text{CH}_3$ ), 53.7 ( $\text{N}_1\text{CO}_2\text{CH}_3$ ), 47.1 ( $\text{C}_2'$ ), 46.9 ( $\text{C}_2$ ), 37.3 ( $\text{C}_3$ ), 36.5 ( $\text{C}(\text{CH}_3)_3$ ), 35.9 ( $\text{C}_{3'}$ ), 31.9 ( $\text{C}(\text{CH}_3)_3$ ), 29.2 ( $\text{N}_8\text{CO}_2\text{C}(\text{CH}_3)_3$ ).

|                                       |                                                                                                                                |
|---------------------------------------|--------------------------------------------------------------------------------------------------------------------------------|
| FTIR (thin film) $\text{cm}^{-1}$ :   | 2960 (m), 1712 (s), 1597 (w), 1447 (m), 1391 (s),<br>1171 (m).                                                                 |
| HRMS (ESI) ( $m/z$ ):                 | calc'd for $\text{C}_{39}\text{H}_{46}\text{N}_6\text{NaO}_8\text{S}$ $[\text{M}+\text{Na}]^+$ : 781.2990,<br>found: 781.2997. |
| $[\alpha]_{\text{D}}^{24}$ :          | -226 ( $c = 1.03$ , $\text{CH}_2\text{Cl}_2$ ).                                                                                |
| TLC (33% acetone in hexanes), $R_f$ : | 0.50 (UV, CAM).                                                                                                                |

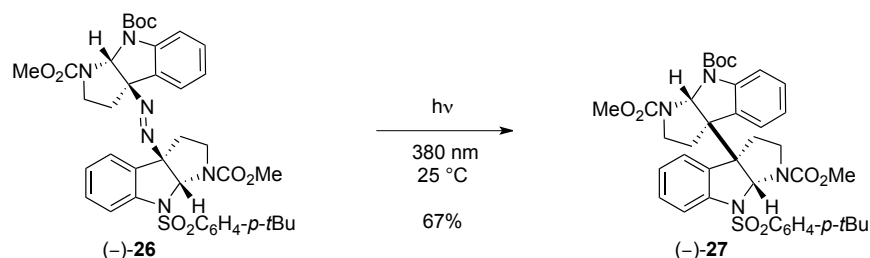

### Heterodimer (-)-27:

A solution of unsymmetrical diazene (-)-**26** (132 mg, 174  $\mu\text{mol}$ , 1 equiv) in dichloromethane (30 mL) was concentrated under reduced pressure in a 100 mL round bottom flask to provide a thin film of diazene (-)-**26** coating the flask. The flask was back filled with argon and irradiated in a Rayonet photoreactor equipped with 16 radially distributed ( $r=12.7$  cm) 25 W lamps ( $\lambda=380$  nm) at 25  $^\circ\text{C}$ . After 12 h, the lamps were turned off and the resulting residue was purified by flash column chromatography on silica gel (eluent: 10 $\rightarrow$ 20% acetone in hexanes) to afford the heterodimer (-)-**27** (85.0 mg, 66.8%) as a white foam.

As a result of the slow conformational equilibration at ambient temperature, NMR spectra were collected at elevated temperature. Structural assignments were made using additional information from gCOSY, HSQC, and HMBC experiments also collected at elevated temperature.

$^1\text{H}$  NMR (500 MHz,  $\text{CD}_3\text{CN}$ , 75  $^\circ\text{C}$ ):  $\delta$  7.85 (d,  $J = 8.5$  Hz, 2H,  $\text{N}_8\text{SO}_2\text{Ar-}o\text{-H}$ ), 7.62 (d,  $J = 8.5$  Hz, 2H,  $\text{N}_8\text{SO}_2\text{Ar-}m\text{-H}$ ), 7.58 (d,  $J = 8.2$  Hz, 1H,  $\text{C}_7\text{H}$ ), 7.44 (d,  $J = 8.2$  Hz, 1H,  $\text{C}_7\text{H}$ ), 7.25–7.13 (m, 4H,  $\text{C}_6\text{H}$ ,  $\text{C}_6'\text{H}$ ,  $\text{C}_4\text{H}$ ,  $\text{C}_4'\text{H}$ ), 6.97 (app-t,  $J = 7.7$  Hz, 1H,  $\text{C}_5\text{H}$ ), 6.88 (app-t,  $J = 7.6$  Hz, 1H,  $\text{C}_5\text{H}$ ), 6.35 (s, 1H,  $\text{C}_{8a}\text{H}$ ), 6.24 (s, 1H,  $\text{C}_{8a}\text{H}$ ), 3.87 (dd,  $J = 7.6$ , 11.5 Hz, 1H,  $\text{C}_2\text{H}_a$ ), 3.76 (dd,  $J = 7.6$ , 10.9 Hz, 1H,  $\text{C}_2\text{H}_a$ ), 3.66 (s, 3H,  $\text{N}_1\text{CO}_2\text{CH}_3$ ), 3.53 (s, 3H,  $\text{N}_1\text{CO}_2\text{CH}_3$ ), 2.70–2.62 (m, 2H,  $\text{C}_2\text{H}_b$ ,  $\text{C}_2\text{H}_b$ ), 2.25 (app-dt,  $J = 7.7$ , 12.2 Hz, 1H,  $\text{C}_3\text{H}_a$ ), 2.13 (dd,  $J = 7.7$ , 12.0 Hz, 1H,  $\text{C}_3\text{H}_a$ ), 2.08–2.01 (m, 2H,  $\text{C}_3\text{H}_b$ ,  $\text{C}_3\text{H}_b$ ), 1.60 (s, 9H,  $\text{N}_1\text{CO}_2\text{C}(\text{CH}_3)_3$ ), 1.36 (s, 9H,  $\text{C}(\text{CH}_3)_3$ ).

$^{13}\text{C}$  NMR (125.8 MHz,  $\text{CD}_3\text{CN}$ , 70  $^\circ\text{C}$ ):  $\delta$  159.1 ( $\text{N}_8\text{SO}_2\text{Ar-}p\text{-C}$ ), 156.6 ( $\text{N}_1\text{CO}_2\text{CH}_3$ ), 156.1 ( $\text{N}_1\text{CO}_2\text{CH}_3$ ), 153.7 ( $\text{N}_8\text{CO}_2\text{C}(\text{CH}_3)_3$ ), 145.3 ( $\text{C}_{7a}$ ), 144.8 ( $\text{C}_{7a}$ ), 140.1 ( $\text{N}_8\text{SO}_2\text{Ar-}ipso\text{-C}$ ), 133.4 ( $\text{C}_{4a}$ ), 133.1 ( $\text{C}_{4a}$ ), 131.0 ( $\text{C}_6$ ), 130.7 ( $\text{C}_6'$ ), 128.1 ( $\text{N}_8\text{SO}_2\text{Ar-}m\text{-C}$ ), 128.0 ( $\text{N}_8\text{SO}_2\text{Ar-}o\text{-C}$ ), 126.2 ( $\text{C}_4$ ), 125.9 ( $\text{C}_4'$ ), 125.1 ( $\text{C}_5$ ), 124.9 ( $\text{C}_5'$ ), 117.8 ( $\text{C}_7$ ), 115.6 ( $\text{C}_7$ ), 83.5 ( $\text{N}_8\text{CO}_2\text{C}(\text{CH}_3)_3$ ), 83.3 ( $\text{C}_{8a}$ ), 81.1 ( $\text{C}_{8a}'$ ), 64.2 ( $\text{C}_{3a}$ ), 63.2 ( $\text{C}_{3a}'$ ), 54.0 ( $\text{N}_1\text{CO}_2\text{CH}_3$ ), 53.9 ( $\text{N}_1\text{CO}_2\text{CH}_3$ ), 46.9 ( $\text{C}_2$ ), 46.6 ( $\text{C}_2'$ ), 37.5 ( $\text{C}_3$ ),



36.7 (C(CH<sub>3</sub>)<sub>3</sub>), 35.6 (C<sub>3</sub>'), 32.1 (C(CH<sub>3</sub>)<sub>3</sub>), 29.5 (N<sub>8</sub>-CO<sub>2</sub>C(CH<sub>3</sub>)<sub>3</sub>).

FTIR (thin film) cm<sup>-1</sup>:

2957 (w), 1711 (s), 1596 (w), 1479 (m), 1391 (w), 1366 (w), 1166 (w).

HRMS (ESI) (*m/z*):

calc'd for C<sub>39</sub>H<sub>46</sub>N<sub>4</sub>NaO<sub>8</sub>S [M+Na]<sup>+</sup>: 753.2929,  
found: 753.2927.

[α]<sub>D</sub><sup>24</sup>:

-162 (*c* = 0.13, CH<sub>2</sub>Cl<sub>2</sub>).

TLC (33% acetone in hexanes), R<sub>f</sub>:

0.37 (UV, CAM).

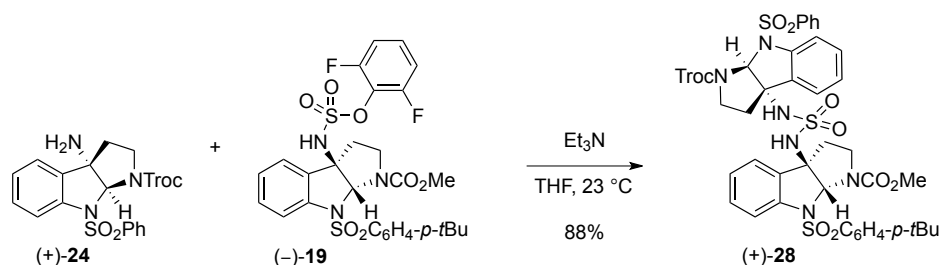

### Mixed Sulfamide (+)-**28**:

Triethylamine (206  $\mu\text{L}$ , 1.47 mmol, 2.20 equiv) was added via syringe to a solution of C3a-aminohexahydropyrroloindole (+)-**24** (328 mg, 670  $\mu\text{mol}$ , 1 equiv) and hexahydropyrroloindole sulfamate ester (-)-**19** (500 mg, 804  $\mu\text{mol}$ , 1.20 equiv) in tetrahydrofuran (3.50 mL) at 23  $^\circ\text{C}$ . After 24 h, the clear solution was concentrated under reduced pressure. The resulting residue was purified by flash column chromatography on silica gel (eluent: 20 $\rightarrow$ 33% acetone in hexanes) to afford the mixed sulfamide (+)-**28** (581 mg, 88.3%) as a white solid.

As a result of the slow conformational equilibration at ambient temperature, NMR spectra were collected at elevated temperature. Structural assignments were made using additional information from gCOSY, HSQC, and HMBC experiments also collected at elevated temperature.

$^1\text{H}$  NMR (500 MHz,  $\text{C}_6\text{D}_6$ , 70  $^\circ\text{C}$ ):

$\delta$  8.04 (br-s, 2H,  $\text{N}_8\text{SO}_2\text{Ph-}o\text{-H}$ ), 7.96 (d,  $J = 7.7$  Hz, 2H,  $\text{N}_8\text{SO}_2\text{Ar-}o\text{-H}$ ), 7.66–7.63 (m, 2H,  $\text{C}_7\text{H}$   $\text{C}_7\text{H}$ ) 7.31 (d,  $J = 7.5$  Hz, 1H,  $\text{C}_4\text{H}$ ) 7.24 (d,  $J = 7.1$  Hz, 1H,  $\text{C}_4\text{H}$ ), 7.20 (d,  $J = 7.6$  Hz, 2H,  $\text{N}_8\text{SO}_2\text{Ar-}m\text{-H}$ ), 7.09–7.05 (m, 2H,  $\text{C}_6\text{H}$ ,  $\text{C}_6\text{H}$ ), 7.04–7.00 (m, 3H,  $\text{N}_8\text{SO}_2\text{Ph-}p\text{-H}$ ,  $\text{N}_8\text{SO}_2\text{Ph-}m\text{-H}$ ), 6.95–6.90 (m, 2H,  $\text{C}_5\text{H}$ ,  $\text{C}_5\text{H}$ ), 6.84 (s, 1H,  $\text{C}_{8a}\text{H}$ ), 6.74 (br-s, 1H,  $\text{C}_{8a}\text{H}$ ), 4.96 (br-s, 2H,  $\text{SO}_2\text{NH}_2$ ), 4.74 (br-s, 1H,  $\text{N}_1\text{CO}_2\text{CH}_a\text{H}_b\text{CCl}_3$ ), 4.53 (d,  $J = 11.6$  Hz, 1H,  $\text{N}_1\text{CO}_2\text{CH}_a\text{H}_b\text{CCl}_3$ ), 3.83 (app-t,  $J = 10.6$  Hz, 1H,  $\text{C}_2\text{H}_a$ ), 3.74 (app-t,  $J = 8.8$  Hz, 1H,  $\text{C}_2\text{H}_a$ ), 3.41 (s, 3H,  $\text{N}_1\text{CO}_2\text{CH}_3$ ), 2.66–2.56 (m, 2H,  $\text{C}_2\text{H}_b$ ,  $\text{C}_2\text{H}_b$ ), 2.54–2.45 (m, 2H,  $\text{C}_3\text{H}_a$ ,  $\text{C}_3\text{H}_a$ ), 2.06 (m, 2H,  $\text{C}_3\text{H}_b$ ,  $\text{C}_3\text{H}_b$ ), 1.07 (s, 9H,  $\text{C}(\text{CH}_3)_3$ ).

$^{13}\text{C}$  NMR (125.8 MHz,  $\text{C}_6\text{D}_6$ , 70  $^\circ\text{C}$ ):

$\delta$  157.5 ( $\text{N}_8\text{SO}_2\text{Ar-}p\text{-C}$ ), 155.4 ( $\text{N}_1\text{CO}_2\text{CH}_3$ ), 153.3 ( $\text{N}_1\text{CO}_2\text{CH}_2\text{CCl}_3$ ), 143.5 ( $\text{C}_{7a}$ ), 143.3 ( $\text{C}_{7a}$ ), 140.8 ( $\text{N}_8\text{SO}_2\text{Ph-}ipso\text{-C}$ ), 138.7 ( $\text{N}_8\text{SO}_2\text{Ar-}ipso\text{-C}$ ), 133.6 ( $\text{N}_8\text{SO}_2\text{Ph-}p\text{-C}$ ), 132.5 ( $\text{C}_{4a}$ ) 132.1 ( $\text{C}_{4a}$ ), 131.0 (2C,  $\text{C}_6$ ,  $\text{C}_6$ ), 129.5 ( $\text{N}_8\text{SO}_2\text{Ph-}m\text{-C}$ ), 128.3 ( $\text{N}_8\text{SO}_2\text{Ar-}o\text{-C}$ ) 128.0 ( $\text{N}_8\text{SO}_2\text{Ph-}o\text{-C}$ ), 126.7 ( $\text{N}_8\text{SO}_2\text{Ar-}m\text{-C}$ ), 125.7 ( $\text{C}_4$ ), 125.6 ( $\text{C}_4$ ), 125.5 (2C,  $\text{C}_5$ ,  $\text{C}_5$ ), 117.8 ( $\text{C}_7$ ), 117.3 ( $\text{C}_7$ ), 95.6 ( $\text{N}_1\text{CO}_2\text{CH}_2\text{CCl}_3$ ), 83.6 ( $\text{C}_{8a}$ ), 83.5 ( $\text{C}_{8a}$ ), 75.9 ( $\text{N}_1\text{CO}_2\text{CH}_2\text{CCl}_3$ ), 73.2 (2C,

$C_{3a}$ ,  $C_{3a'}$ ), 52.9 ( $N_1CO_2CH_3$ ), 45.8 ( $C_2$ ), 45.7 ( $C_{2'}$ ), 37.4 ( $C_3$ ), 36.6 ( $C_{3'}$ ), 35.4 ( $C(CH_3)_3$ ), 31.3 ( $C(CH_3)_3$ ).

FTIR (thin film)  $cm^{-1}$ : 2959 (w), 1717 (m), 1600 (w), 1448 (m), 1400 (w).

HRMS (ESI) ( $m/z$ ): calc'd for  $C_{41}H_{47}Cl_3N_7O_{10}S_3$   $[M+NH_4]^+$ : 998.1607, found: 998.1611.

$[\alpha]_D^{24}$ : +19 ( $c = 0.32$ ,  $CH_2Cl_2$ ).

TLC (33% acetone in hexanes),  $R_f$ : 0.18 (UV, CAM).

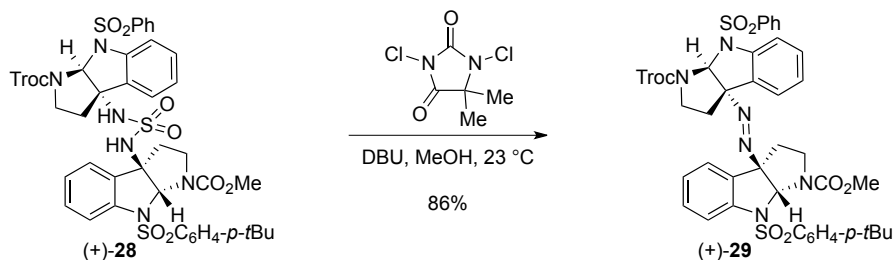

### Unsymmetrical Diazene (+)-29:

1,8-Diazabicyclo[5.4.0]undec-7-ene (DBU, 152  $\mu$ L, 1.02 mmol, 5.00 equiv) was added via syringe to a solution of mixed sulfamide (+)-28 (200 mg, 203  $\mu$ mol, 1 equiv) in methanol (15.0 mL) at 23 °C. After 5 min, a solution of 1,3-dichloro-5,5-dimethylhydantoin (100 mg, 507  $\mu$ mol, 2.50 equiv) in methanol (5 mL) was added via syringe over 1 min. After 30 min, the clear solution was concentrated under reduced pressure. The resulting residue was purified by flash column chromatography on silica gel (eluent: 17 $\rightarrow$ 25% acetone in hexanes) to afford the unsymmetrical diazene (+)-29 (159 mg, 85.5%) as a white foam.

As a result of the slow conformational equilibration at ambient temperature, NMR spectra were collected at elevated temperature. Structural assignments were made using additional information from gCOSY, HSQC, and HMBC experiments also collected at elevated temperature.

$^1\text{H}$  NMR (500 MHz,  $\text{CD}_3\text{CN}$ , 70 °C):

$\delta$  7.82–7.79 (m, 4H,  $\text{N}_8\text{SO}_2\text{Ph-}o\text{-H}$ ,  $\text{N}_8\text{SO}_2\text{Ar-}o\text{-H}$ ), 7.62 (d,  $J = 8.3$  Hz, 1H,  $\text{C}_7\text{H}$ ) 7.55–7.49 (m, 4H,  $\text{N}_8\text{SO}_2\text{Ph-}p\text{-H}$ ,  $\text{N}_8\text{SO}_2\text{Ar-}m\text{-H}$ ,  $\text{C}_7\text{H}$ ), 7.41–7.36 (m, 4H,  $\text{N}_8\text{SO}_2\text{Ph-}m\text{-H}$ ,  $\text{C}_6\text{H}$ ,  $\text{C}_6'\text{H}$ ), 7.20–7.16 (m, 2H,  $\text{C}_5\text{H}$ ,  $\text{C}_4'\text{H}$ ), 7.11–7.05 (m, 2H,  $\text{C}_5\text{H}$ ,  $\text{C}_4\text{H}$ ), 6.71 (s, 1H,  $\text{C}_{8a}\text{H}$ ), 6.55 (s, 1H,  $\text{C}_{8a}\text{H}$ ), 4.92 (d,  $J = 10.8$ , 1H,  $\text{N}_1\text{CO}_2\text{CH}_a\text{H}_b\text{CCl}_3$ ), 4.80 (d,  $J = 12.1$  Hz, 1H,  $\text{N}_1\text{CO}_2\text{CH}_a\text{H}_b\text{CCl}_3$ ), 4.01 (dd,  $J = 7.9$ , 11.7 Hz, 1H,  $\text{C}_2\text{H}_a$ ), 3.83 (dd,  $J = 8.0$ , 11.4 Hz, 1H,  $\text{C}_2\text{H}_a$ ), 3.65 (s, 3H,  $\text{N}_1\text{CO}_2\text{CH}_3$ ), 3.05 (app-dt,  $J = 5.5$ , 11.8 Hz, 1H,  $\text{C}_2\text{H}_b$ ) 2.94 (app-dt,  $J = 5.7$ , 12.7 Hz, 1H,  $\text{C}_2\text{H}_b$ ), 2.21 (dd,  $J = 5.3$ , 12.7 Hz, 1H,  $\text{C}_3\text{H}_a$ ), 2.12 (dd,  $J = 5.6$ , 12.7 Hz, 1H,  $\text{C}_3\text{H}_a$ ), 2.01–1.89 (m, 2H,  $\text{C}_3\text{H}_b$ ,  $\text{C}_3\text{H}_b$ ), 1.28 (s, 9H,  $\text{C}(\text{CH}_3)_3$ ).

$^{13}\text{C}$  NMR (125.8 MHz,  $\text{CD}_3\text{CN}$ , 70 °C):

$\delta$  159.3 ( $\text{N}_8\text{SO}_2\text{Ar-}p\text{-C}$ ), 156.4 ( $\text{N}_1\text{CO}_2\text{CH}_3$ ), 154.3 ( $\text{N}_1\text{CO}_2\text{CH}_2\text{CCl}_3$ ), 144.3 ( $\text{C}_{7a}$ ), 144.1 ( $\text{C}_{7a}'$ ), 140.1 ( $\text{N}_8\text{SO}_2\text{Ph-}ipso\text{-C}$ ), 138.3 ( $\text{N}_8\text{SO}_2\text{Ar-}ipso\text{-C}$ ), 135.4 ( $\text{N}_8\text{SO}_2\text{Ph-}p\text{-C}$ ), 132.4 ( $\text{C}_{6'}$ ), 132.1 ( $\text{C}_6$ ), 131.2 ( $\text{C}_{4a}'$ ), 131.1 ( $\text{C}_{4a}$ ), 131.0 ( $\text{N}_8\text{SO}_2\text{Ph-}m\text{-C}$ ), 129.1 ( $\text{N}_8\text{SO}_2\text{Ar-}o\text{-C}$ ), 129.0 ( $\text{N}_8\text{SO}_2\text{Ph-}o\text{-C}$ ), 128.1 ( $\text{N}_8\text{SO}_2\text{Ar-}m\text{-C}$ ), 127.3 ( $\text{C}_{4'}$ ), 127.0 ( $\text{C}_4$ ), 126.9 ( $\text{C}_{5'}$ ), 126.5 ( $\text{C}_5$ ), 117.5 ( $\text{C}_{7'}$ ), 117.2 ( $\text{C}_{7'}$ ), 97.5 ( $\text{N}_1\text{CO}_2\text{CH}_2\text{CCl}_3$ ), 90.9 (2C,  $\text{C}_{3a}$ ,  $\text{C}_{3a}'$ ), 83.2 ( $\text{C}_{8a}$ ), 82.7 ( $\text{C}_{8a}'$ ), 76.8 ( $\text{N}_1\text{CO}_2\text{CH}_2\text{CCl}_3$ ), 54.0

(N<sub>1</sub>CO<sub>2</sub>CH<sub>3</sub>), 47.4 (C<sub>2'</sub>), 47.1 (C<sub>2</sub>), 38.7 (C<sub>3'</sub>), 37.8 (C<sub>3</sub>), 36.7 (C(CH<sub>3</sub>)<sub>3</sub>), 32.1 (C(CH<sub>3</sub>)<sub>3</sub>).

FTIR (thin film) cm<sup>-1</sup>: 2958 (w), 1718 (s), 1597 (w), 1447 (m), 1366 (w).

HRMS (ESI) (*m/z*): calc'd for C<sub>41</sub>H<sub>45</sub>Cl<sub>3</sub>N<sub>7</sub>O<sub>8</sub>S<sub>2</sub> [M+NH<sub>4</sub>]<sup>+</sup>: 932.1831, found: 932.1853.

[α]<sub>D</sub><sup>24</sup>: +13 (*c* = 0.38, CH<sub>2</sub>Cl<sub>2</sub>).

TLC (33% acetone in hexanes), R<sub>f</sub>: 0.29 (UV, CAM).

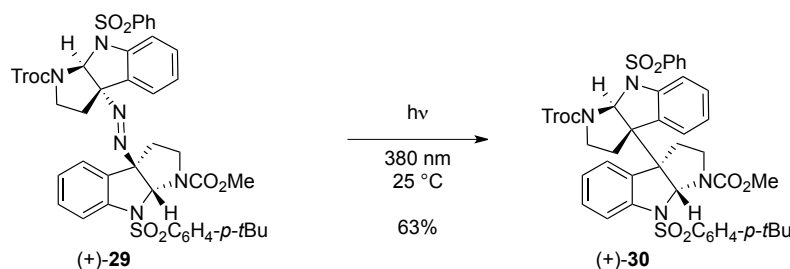

### Heterodimer (+)-30:

A solution of unsymmetrical diazene (+)-**29** (159 mg, 174  $\mu\text{mol}$ , 1 equiv) in dichloromethane (30 mL) was concentrated under reduced pressure in a 250 mL round bottom flask to provide a thin film of diazene (+)-**29** coating the flask. The flask was back filled with argon and irradiated in a Rayonet photoreactor equipped with 16 radially distributed ( $r=12.7$  cm) 25 W lamps ( $\lambda_{\text{max}}=380$  nm) at 25  $^{\circ}\text{C}$ . After 7 h, the thin film was purified by flash column chromatography on silica gel (eluent: 17 $\rightarrow$ 50% ethyl acetate in hexanes) to afford the heterodimer (+)-**30** (98 mg, 63.4%) as a white foam.

As a result of the slow conformational equilibration at ambient temperature, NMR spectra were collected at elevated temperature. Structural assignments were made using additional information from gCOSY, HSQC, and HMBC experiments also collected at elevated temperature.

$^1\text{H}$  NMR (500 MHz,  $\text{DMSO-}d_6$ , 100  $^{\circ}\text{C}$ ):  $\delta$  7.92 (d,  $J = 7.6$  Hz, 2H,  $\text{N}_8\text{SO}_2\text{Ph-}o\text{-H}$ ), 7.73 (d,  $J = 8.4$  Hz, 2H,  $\text{N}_8\text{SO}_2\text{Ar-}o\text{-H}$ ), 7.67 (t,  $J = 7.3$  Hz, 1H,  $\text{N}_8\text{SO}_2\text{Ph-}p\text{-H}$ ), 7.60–7.57 (m, 4H,  $\text{N}_8\text{SO}_2\text{Ar-}m\text{-H}$ ,  $\text{N}_8\text{SO}_2\text{Ph-}m\text{-H}$ ), 7.40–7.37 (m, 2H,  $\text{C}_7\text{H}$ ,  $\text{C}_7\text{H}$ ), 7.34–7.28 (m, 2H,  $\text{C}_6\text{H}$ ,  $\text{C}_6\text{H}$ ), 7.20 (br-s, 1H,  $\text{C}_4\text{H}$ ), 7.07 (app-t,  $J = 7.5$  Hz, 1H,  $\text{C}_5\text{H}$ ), 6.98 (app-t,  $J = 7.4$  Hz, 1H,  $\text{C}_5\text{H}$ ), 6.80 (br-s, 1H,  $\text{C}_4\text{H}$ ), 6.47 (s, 1H,  $\text{C}_{8a}\text{H}$ ), 6.28 (s, 1H,  $\text{C}_{8a}\text{H}$ ), 4.82 (d,  $J = 11.9$ , 1H,  $\text{N}_1\text{CO}_2\text{CH}_a\text{H}_b\text{CCl}_3$ ), 4.71 (d,  $J = 11.9$  Hz, 1H,  $\text{N}_1\text{CO}_2\text{CH}_a\text{H}_b\text{CCl}_3$ ), 3.82 (dd,  $J = 7.3, 11.7$  Hz, 1H,  $\text{C}_2\text{H}_a$ ), 3.72 (dd,  $J = 7.6, 11.5$  Hz, 1H,  $\text{C}_2\text{H}_a$ ), 3.50 (s, 3H,  $\text{N}_1\text{CO}_2\text{CH}_3$ ), 2.67–2.60 (m, 2H,  $\text{C}_2\text{H}_b$ ,  $\text{C}_2\text{H}_b$ ), 2.05–1.99 (m, 2H,  $\text{C}_3\text{H}$ ,  $\text{C}_3\text{H}_a$ ), 1.89 (dd,  $J = 12.5, 19.9$  Hz, 1H,  $\text{C}_3\text{H}_b$ ), 1.77 (app-dt,  $J = 7.9, 11.7$  Hz, 1H,  $\text{C}_3\text{H}_b$ ), 1.31 (s, 9H,  $\text{C}(\text{CH}_3)_3$ ).

$^{13}\text{C}$  NMR (125.8 MHz,  $\text{DMSO-}d_6$ , 100  $^{\circ}\text{C}$ ):  $\delta$  156.0 ( $\text{N}_8\text{SO}_2\text{Ar-}p\text{-C}$ ), 153.0 ( $\text{N}_1\text{CO}_2\text{CH}_3$ ), 151.2 ( $\text{N}_1\text{CO}_2\text{CH}_2\text{CCl}_3$ ), 142.3 ( $\text{C}_{7a}$ ), 141.9 ( $\text{C}_{7a}$ ), 139.8 ( $\text{N}_8\text{SO}_2\text{Ph-}ipso\text{-C}$ ), 137.1 ( $\text{N}_8\text{SO}_2\text{Ar-}ipso\text{-C}$ ), 132.8 ( $\text{N}_8\text{SO}_2\text{Ph-}p\text{-C}$ ), 130.0 ( $\text{C}_{4a}$ ), 129.6 ( $\text{C}_{4a}$ ), 129.1 ( $\text{C}_{6/6'}$ ), 128.8 ( $\text{N}_8\text{SO}_2\text{Ph-}m\text{-C}$ ), 125.7 ( $\text{N}_8\text{SO}_2\text{Ph-}o\text{-C}$ ), 125.5 ( $\text{N}_8\text{SO}_2\text{Ar-}o/m\text{-C}$ ), 123.7 (2C,  $\text{C}_4$ ,  $\text{C}_4$ ), 123.4 (2C,  $\text{C}_5$ ,  $\text{C}_5$ ), 113.7 ( $\text{C}_7$ ), 113.4 ( $\text{C}_7$ ), 95.1 ( $\text{N}_1\text{CO}_2\text{CH}_2\text{CCl}_3$ ), 79.8 (2C,  $\text{C}_{8a}$ ,  $\text{C}_{8a}$ ), 73.9

(N<sub>1</sub>CO<sub>2</sub>CH<sub>2</sub>CCl<sub>3</sub>), 61.3 (2C, C<sub>3a</sub>, C<sub>3a'</sub>), 51.8 (N<sub>1</sub>CO<sub>2</sub>CH<sub>3</sub>), 44.8 (C<sub>2'</sub>), 44.4 (C<sub>2</sub>), 35.0 (C<sub>3'</sub>), 34.5 (C<sub>3</sub>), 34.3 (C(CH<sub>3</sub>)<sub>3</sub>), 31.2 (C(CH<sub>3</sub>)<sub>3</sub>).

FTIR (thin film) cm<sup>-1</sup>: 2957(w), 1716 (s), 1595 (w), 1447 (m), 1167 (w).

HRMS (ESI) (*m/z*): calc'd for C<sub>41</sub>H<sub>41</sub>Cl<sub>3</sub>N<sub>4</sub>NaO<sub>8</sub>S<sub>2</sub> [M+Na]<sup>+</sup>: 909.1324, found: 909.1313.

[α]<sub>D</sub><sup>24</sup>: +23 (*c* = 0.49, CH<sub>2</sub>Cl<sub>2</sub>).

TLC (33% ethyl acetate in hexanes), R<sub>f</sub>: 0.29 (UV, CAM).

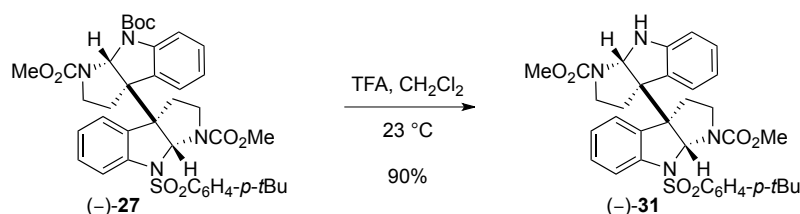

### **N8'-H Heterodimer (-)-31:**

Trifluoroacetic acid (400  $\mu\text{L}$ ) was added via syringe to a solution of heterodimer (-)-27 (67.0 mg, 91.8  $\mu\text{mol}$ , 1 equiv) in dichloromethane (1.60 mL) at 23  $^\circ\text{C}$ . After 45 min, the orange solution was diluted with dichloromethane (25 mL) and washed with aqueous saturated sodium bicarbonate solution ( $2 \times 15$  mL). The combined aqueous washes were extracted with dichloromethane ( $2 \times 20$  mL). The combined organic extracts were washed with brine (15 mL), were dried over anhydrous sodium sulfate, were filtered, and were concentrated under reduced pressure. The resulting residue was purified by flash column chromatography on silica gel (eluent: 20 $\rightarrow$ 25% acetone in hexanes) to afford the N8'-H heterodimer (-)-31 (52.0 mg, 89.6%) as a white foam.

As a result of the slow conformational equilibration at ambient temperature, NMR spectra were collected at elevated temperature. Structural assignments were made using additional information from gCOSY, HSQC, and HMBC experiments also collected at elevated temperature.

$^1\text{H}$  NMR (500 MHz,  $\text{CD}_3\text{CN}$ , 70  $^\circ\text{C}$ ):  $\delta$  7.84 (d,  $J = 8.3\text{Hz}$ , 2H,  $\text{N}_8\text{SO}_2\text{Ar-}o\text{-H}$ ), 7.64 (d,  $J = 8.3\text{Hz}$ , 2H,  $\text{N}_8\text{SO}_2\text{Ar-}m\text{-H}$ ), 7.53 (d,  $J = 8.3\text{Hz}$ , 1H,  $\text{C}_7\text{H}$ ), 7.46 (d,  $J = 7.7\text{ Hz}$ , 1H,  $\text{C}_4\text{H}$ ), 7.27 (app-t,  $J = 7.9\text{ Hz}$ , 1H,  $\text{C}_6\text{H}$ ), 7.06–7.02 (m, 3H,  $\text{C}_6\text{H}$ ,  $\text{C}_5\text{H}$ ,  $\text{C}_4\text{H}$ ), 6.61 (app-t,  $J = 7.5\text{ Hz}$ , 1H,  $\text{C}_5\text{H}$ ), 6.55 (d,  $J = 7.7\text{ Hz}$ , 1H,  $\text{C}_7\text{H}$ ), 5.96 (s, 1H,  $\text{C}_{8a}\text{H}$ ), 4.85 (br-s, 1H,  $\text{N}_8\text{H}$ ), 4.79 (s, 1H,  $\text{C}_{8a}\text{H}$ ), 3.88 (dd,  $J = 7.9, 11.1\text{ Hz}$ , 1H,  $\text{C}_2\text{H}_a$ ), 3.61 (s, 3H,  $\text{N}_1\text{CO}_2\text{CH}_3$ ), 3.54 (app-t,  $J = 8.4\text{ Hz}$ , 1H,  $\text{C}_2\text{H}_a$ ), 3.47 (s, 3H,  $\text{N}_1\text{CO}_2\text{CH}_3$ ), 2.80–2.67 (m, 2H,  $\text{C}_2\text{H}_b$ ,  $\text{C}_2\text{H}_b$ ), 2.46 (app-dt,  $J = 7.9, 12.1\text{ Hz}$ , 1H,  $\text{C}_3\text{H}_a$ ), 2.35 (dd,  $J = 11.2, 20.3\text{ Hz}$ , 1H,  $\text{C}_3\text{H}_a$ ), 2.12 (dd,  $J = 6.0, 12.5\text{ Hz}$ , 1H,  $\text{C}_3\text{H}_b$ ), 2.07 (dd,  $J = 5.4, 12.5\text{ Hz}$ , 1H,  $\text{C}_3\text{H}_b$ ), 1.37 (s, 9H,  $\text{C}(\text{CH}_3)_3$ ).

$^{13}\text{C}$  NMR (125.8 MHz,  $\text{CD}_3\text{CN}$ , 70  $^\circ\text{C}$ ):  $\delta$  159.2 ( $\text{N}_8\text{SO}_2\text{Ar-}p\text{-C}$ ), 156.1 (2C,  $\text{N}_1\text{CO}_2\text{CH}_3$ ,  $\text{N}_1\text{CO}_2\text{CH}_3$ ), 152.3 ( $\text{C}_{7a'}$ ), 144.7 ( $\text{C}_{7a}$ ), 139.3 ( $\text{N}_8\text{SO}_2\text{Ar-}ipso\text{-C}$ ), 133.7 ( $\text{C}_{4a}$ ), 131.0 ( $\text{C}_5$ ,  $\text{C}_6$ ), 130.3 ( $\text{C}_{4a'}$ ), 128.5 ( $\text{N}_8\text{SO}_2\text{Ar-}o\text{-C}$ ), 128.1 ( $\text{N}_8\text{SO}_2\text{Ar-}m\text{-C}$ ), 127.0 ( $\text{C}_4$ ), 126.1 ( $\text{C}_6'$ ), 125.3 ( $\text{C}_4'$ ), 120.3 ( $\text{C}_5'$ ), 115.5 ( $\text{C}_7$ ), 111.2 ( $\text{C}_7'$ ), 83.2 ( $\text{C}_{8a}$ ), 80.3 ( $\text{C}_{8a'}$ ), 64.3 (2C,  $\text{C}_{3a}$ ,  $\text{C}_{3a'}$ ), 53.8 ( $\text{N}_1\text{CO}_2\text{CH}_3$ ), 53.6 ( $\text{N}_1\text{CO}_2\text{CH}_3$ ), 46.5 (2C,  $\text{C}_2$ ,  $\text{C}_2'$ ), 37.6 ( $\text{C}_3$ ), 36.8 ( $\text{C}(\text{CH}_3)_3$ ), 34.5 ( $\text{C}_3'$ ), 32.2 ( $\text{C}(\text{CH}_3)_3$ ).



|                                             |                                                                                                                             |
|---------------------------------------------|-----------------------------------------------------------------------------------------------------------------------------|
| FTIR (thin film) $\text{cm}^{-1}$ :         | 3550 (br-m), 2956 (w), 1706 (s), 1595 (w), 1448 (s), 1384 (m), 1175 (m).                                                    |
| HRMS (ESI) ( $m/z$ ):                       | calc'd for $\text{C}_{34}\text{H}_{39}\text{N}_4\text{O}_6\text{S}$ $[\text{M}+\text{H}]^+$ : 631.2585,<br>found: 631.2588. |
| $[\alpha]_{\text{D}}^{24}$ :                | -283 ( $c = 0.53$ , $\text{CH}_2\text{Cl}_2$ ).                                                                             |
| TLC (33% ethyl acetate in hexanes), $R_f$ : | 0.30 (UV, CAM).                                                                                                             |

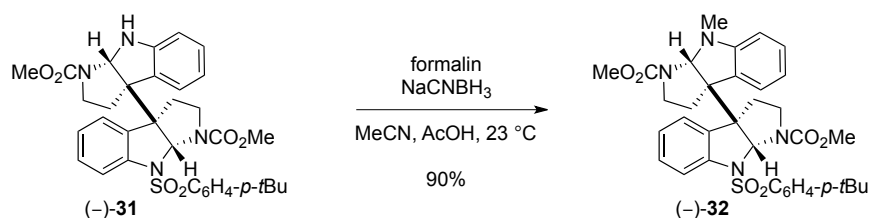

### **N8'-Methyl Heterodimer (–)-32:**

Formalin (37% wt, 1.26 mL, 16.76 mmol, 235 equiv) and sodium cyanoborohydride in tetrahydrofuran (1.0 M, 214  $\mu\text{L}$ , 214  $\mu\text{mol}$ , 3.00 equiv) were added sequentially via syringe to a solution of N8'-H heterodimer (–)-**31** (45.0 mg, 71.3  $\mu\text{mol}$ , 1 equiv) in acetonitrile–acetic acid (10:1, 3.85 mL) at 23  $^\circ\text{C}$ . After 30 min, another portion of sodium cyanoborohydride (1.0 M in tetrahydrofuran, 71.0  $\mu\text{L}$ , 71.0  $\mu\text{mol}$ , 1.00 equiv) was added via syringe. After an additional 30 min, a saturated aqueous sodium bicarbonate solution (10 mL) was added and the resulting mixture was extracted with dichloromethane ( $3 \times 20$  mL). The combined organic extracts were washed with brine (15 mL), were dried over anhydrous sodium sulfate, were filtered, and were concentrated under reduced pressure. The resulting residue was purified by flash column chromatography on silica gel (eluent: 15 $\rightarrow$ 20% acetone in hexanes) to afford the N8'-methyl heterodimer (–)-**32** (41.0 mg, 89.6%) as a white foam.

As a result of the slow conformational equilibration at ambient temperature, NMR spectra were collected at elevated temperature. Structural assignments were made using additional information from gCOSY, HSQC, and HMBC experiments also collected at elevated temperature.

$^1\text{H}$  NMR (500 MHz,  $\text{CD}_3\text{CN}$ , 70  $^\circ\text{C}$ ):

$\delta$  7.83 (d,  $J = 8.3$  Hz, 2H,  $\text{N}_8\text{SO}_2\text{Ar-}o\text{-H}$ ), 7.61 (d,  $J = 8.3$  Hz, 2H,  $\text{N}_8\text{SO}_2\text{Ar-}m\text{-H}$ ), 7.43 (d,  $J = 8.3$  Hz, 1H,  $\text{C}_7\text{H}$ ), 7.36 (d,  $J = 7.7$  Hz, 1H,  $\text{C}_4\text{H}$ ), 7.25 (app-t,  $J = 7.9$  Hz, 1H,  $\text{C}_6\text{H}$ ), 7.08 (app-t,  $J = 7.7$  Hz, 1H,  $\text{C}_6'\text{H}$ ), 7.04–6.97 (m, 2H,  $\text{C}_5\text{H}$ ,  $\text{C}_4'\text{H}$ ), 6.50 (app-t,  $J = 7.5$  Hz, 1H,  $\text{C}_5'\text{H}$ ), 6.35 (d,  $J = 8.0$  Hz, 1H,  $\text{C}_7'\text{H}$ ), 6.05 (s, 1H,  $\text{C}_{8a}\text{H}$ ), 5.16 (s, 1H,  $\text{C}_{8a}'\text{H}$ ), 3.87 (dd,  $J = 8.0, 11.2$  Hz, 1H,  $\text{C}_2\text{H}_a$ ), 3.77 (dd,  $J = 8.5, 10.4$  Hz, 1H,  $\text{C}_2'\text{H}_a$ ), 3.60 (s, 3H,  $\text{N}_1\text{-CO}_2\text{CH}_3$ ), 3.45 (s, 3H,  $\text{N}_1\text{CO}_2\text{CH}_3$ ), 2.83 (s, 3H,  $\text{N}_1\text{-CH}_3$ ), 2.77–2.65 (m, 2H,  $\text{C}_2\text{H}_b$ ,  $\text{C}_2'\text{H}_b$ ), 2.43 (app dt,  $J = 8.0, 12.0$  Hz, 1H,  $\text{C}_3\text{H}_a$ ), 2.24 (app-dt,  $J = 8.0, 11.7$  Hz, 1H,  $\text{C}_3'\text{H}_a$ ), 2.11 (dd,  $J = 5.4, 12.5$  Hz, 1H,  $\text{C}_3\text{H}_b$ ), 2.05 (dd,  $J = 5.6, 12.3$  Hz, 1H,  $\text{C}_3'\text{H}_b$ ), 1.35 (s, 9H,  $\text{C}(\text{CH}_3)_3$ ).

$^{13}\text{C}$  NMR (125.8 MHz,  $\text{CD}_3\text{CN}$ , 70  $^\circ\text{C}$ ):

$\delta$  159.0 ( $\text{N}_8\text{SO}_2\text{Ar-}p\text{-C}$ ), 156.9 ( $\text{N}_1\text{-CO}_2\text{CH}_3$ ), 156.1 ( $\text{N}_1\text{CO}_2\text{CH}_3$ ), 153.7 ( $\text{C}_{7a}'$ ), 144.7 ( $\text{C}_{7a}$ ), 139.9 ( $\text{N}_8\text{SO}_2\text{Ar-}ipso\text{-C}$ ), 133.8 ( $\text{C}_{4a}$ ), 131.1 ( $\text{C}_{6'}$ ), 130.8 ( $2\text{C}$ ,  $\text{C}_6$ ,  $\text{C}_{4a}'$ ), 128.2 ( $\text{N}_8\text{SO}_2\text{Ar-}o\text{-C}$ ), 128.1 ( $\text{N}_8\text{SO}_2\text{Ar-}m\text{-C}$ ), 126.6 ( $\text{C}_4$ ), 125.6 ( $\text{C}_4'$ ), 125.2 ( $\text{C}_5$ ), 118.9 ( $\text{C}_5'$ ), 115.7 ( $\text{C}_7$ ), 107.5 ( $\text{C}_7'$ ), 85.6

(C<sub>8a'</sub>), 83.3 (C<sub>8a</sub>), 64.4 (C<sub>3a</sub>), 63.6 (C<sub>3a'</sub>), 53.8 (N<sub>1</sub>CO<sub>2</sub>CH<sub>3</sub>), 53.6 (N<sub>1'</sub>CO<sub>2</sub>CH<sub>3</sub>), 46.6 (2C, C<sub>2</sub>, C<sub>2'</sub>), 37.2 (C<sub>3</sub>), 36.7 (C(CH<sub>3</sub>)<sub>3</sub>), 36.0 (C<sub>3'</sub>), 33.0 (N<sub>1'</sub>CH<sub>3</sub>), 32.1 (C(CH<sub>3</sub>)<sub>3</sub>).

FTIR (thin film) cm<sup>-1</sup>: 2956 (w), 1708 (s), 1605 (w), 1446 (m), 1385 (m).

HRMS (ESI) (*m/z*): calc'd for C<sub>35</sub>H<sub>41</sub>N<sub>4</sub>O<sub>6</sub>S [M+H]<sup>+</sup>: 645.2741, found: 645.2728.

[α]<sub>D</sub><sup>24</sup>: -321 (*c* = 0.17, CH<sub>2</sub>Cl<sub>2</sub>).

TLC (25% acetone in hexanes), R<sub>f</sub>: 0.18 (UV, CAM).

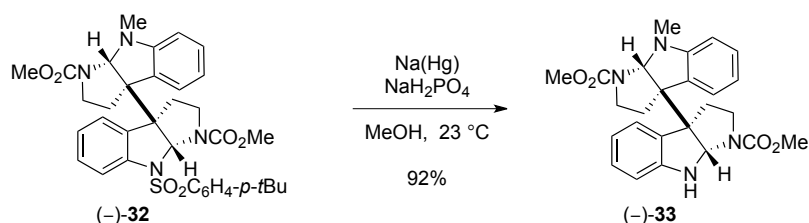

**(-)-N1,N1'-Carboxymethyl Calycanthidine (**33**):**

Sodium amalgam (5%-Na, 469 mg, 1.02 mmol, 20.0 equiv)<sup>8</sup> was added to a suspension of sodium phosphate monobasic monohydrate (154 mg, 1.12 mmol, 22.0 equiv) and N8'-methyl heterodimer (-)-**32** (33.0 mg, 51.2  $\mu\text{mol}$ , 1 equiv) in methanol at 23  $^\circ\text{C}$ . After 1 h, another portion of sodium phosphate monobasic monohydrate (154 mg, 1.12 mmol, 22.0 equiv) and sodium amalgam (5%-Na, 469 mg, 1.02 mmol, 20.0 equiv) were added sequentially. After an additional 1 h, the reaction mixture was diluted with ethyl acetate (20 mL) and was washed with a 5% aqueous sodium bicarbonate solution (10 mL). The aqueous phase was separated and extracted with ethyl acetate (2  $\times$  20 mL). The combined organic layers were washed with brine (10 mL), were dried over anhydrous sodium sulfate, were filtered, and were concentrated under reduced pressure. The resulting residue was purified by flash column chromatography on silica gel (eluent: gradient, 15 $\rightarrow$ 20% acetone in hexanes) to afford (-)-N1,N1'-carboxymethyl calycanthidine (**33**, 21.0 mg, 91.8%) as a white foam.

As a result of the slow conformational equilibration at ambient temperature, NMR spectra were collected at elevated temperature. Structural assignments were made using additional information from gCOSY, HSQC, and HMBC experiments also collected at elevated temperature.

<sup>1</sup>H NMR (500 MHz, CD<sub>3</sub>CN, 70  $^\circ\text{C}$ ):  $\delta$  7.27–7.23 (m, 2H, C<sub>4</sub>H, C<sub>4'</sub>H), 7.13 (app-t,  $J$  = 7.5 Hz, 1H, C<sub>6</sub>H), 7.08 (app-t,  $J$  = 7.7 Hz, 1H, C<sub>6</sub>H), 6.71 (app-t,  $J$  = 7.4 Hz, 1H, C<sub>5</sub>H), 6.65 (app-t,  $J$  = 7.5 Hz, 1H, C<sub>5</sub>H), 6.61 (d,  $J$  = 7.7 Hz, 1H, C<sub>7</sub>H), 6.40 (d,  $J$  = 8.0 Hz, 1H, C<sub>7</sub>H), 5.30 (br-s, 1H, N<sub>8</sub>H), 5.10 (s, 1H, C<sub>8a</sub>H), 4.85 (s, 1H, C<sub>8a</sub>H), 3.82–3.73 (m, 1H, C<sub>2</sub>H<sub>a</sub>), 3.63–3.57 (m, 1H, C<sub>2</sub>H<sub>a</sub>), 3.61 (s, 3H, N<sub>1</sub>CO<sub>2</sub>CH<sub>3</sub>), 3.57 (s, 3H, N<sub>1</sub>'CO<sub>2</sub>CH<sub>3</sub>), 2.90 (s, 3H, N<sub>8</sub>CH<sub>3</sub>), 2.81 (app-dt,  $J$  = 6.1, 10.7 Hz, 1H, C<sub>2</sub>H<sub>b</sub>), 2.71 (app-dt,  $J$  = 5.8, 11.2 Hz, 1H, C<sub>2</sub>H<sub>b</sub>), 2.62–2.46 (m, 2H, C<sub>3</sub>H<sub>a</sub>, C<sub>3</sub>'H<sub>a</sub>), 2.21 (dd,  $J$  = 6.1, 12.5 Hz, 1H, C<sub>3</sub>H<sub>b</sub>), 2.12 (dd,  $J$  = 5.6, 12.3 Hz, 1H, C<sub>3</sub>'H<sub>b</sub>).

<sup>13</sup>C NMR (125.8 MHz, CD<sub>3</sub>CN, 70  $^\circ\text{C}$ ):  $\delta$  157.0 (N<sub>1</sub>'CO<sub>2</sub>CH<sub>3</sub>), 153.9 (C<sub>7a</sub>'), 152.7 (C<sub>7a</sub>), 131.3, (C<sub>4a</sub>') 131.0 (C<sub>6</sub>'), 130.9 (C<sub>4a</sub>), 130.8 (C<sub>6</sub>), 126.5 (C<sub>4</sub>), 126.2 (C<sub>4</sub>'), 120.1 (C<sub>5</sub>), 118.8 (C<sub>5</sub>'), 111.0 (C<sub>7</sub>), 107.5 (C<sub>7</sub>'), 85.8 (C<sub>8a</sub>'), 80.4 (C<sub>8a</sub>), 63.0

<sup>8</sup> The reagent was prepared according to R. N. McDonald and C. E. Reineke *Org. Synth.*1988, **6**, 461.

|                                                |                                                                                                                                                                                                                                                                                         |
|------------------------------------------------|-----------------------------------------------------------------------------------------------------------------------------------------------------------------------------------------------------------------------------------------------------------------------------------------|
|                                                | (C <sub>3a'</sub> ), 53.5 (2C, N <sub>1</sub> CO <sub>2</sub> CH <sub>3</sub> , N <sub>1'</sub> CO <sub>2</sub> CH <sub>3</sub> ), 46.8 (2C, C <sub>2</sub> , C <sub>2'</sub> ), 35.4 (C <sub>3'</sub> ), 34.0 (C <sub>3</sub> ), 33.5 (N <sub>8'</sub> CH <sub>3</sub> ). <sup>9</sup> |
| FTIR (thin film) cm <sup>-1</sup> :            | 3363 (br-w), 2953 (w), 2881 (w), 1698 (s), 1605 (m), 1449 (s), 1383 (s), 1202 (w).                                                                                                                                                                                                      |
| HRMS (ESI) ( <i>m/z</i> ):                     | calc'd for C <sub>25</sub> H <sub>29</sub> N <sub>4</sub> O <sub>4</sub> [M+H] <sup>+</sup> : 499.2183, found: 449.2172.                                                                                                                                                                |
| [α] <sub>D</sub> <sup>24</sup> :               | -509 ( <i>c</i> = 0.78, CH <sub>2</sub> Cl <sub>2</sub> ).                                                                                                                                                                                                                              |
| TLC (25% acetone in hexanes), R <sub>f</sub> : | 0.30 (UV, CAM).                                                                                                                                                                                                                                                                         |

---

<sup>9</sup> The C<sub>3a'</sub> and N<sub>1</sub>CO<sub>2</sub>CH<sub>3</sub> were not observed, due to signal broadening, even at 70 °C. All expected <sup>13</sup>C signals were observed in the following compound.

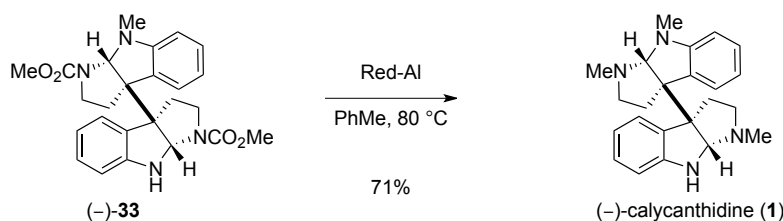

### **(-)-Calycanthidine (1):**

(-)-N1,N1'-Carboxymethyl calycanthidine (**33**, 15.4 mg, 34.3  $\mu\text{mol}$ , 1 equiv) was azeotropically dried from anhydrous benzene ( $2 \times 5$  mL) and the residue was dissolved in toluene (3.5 mL). A solution of sodium bis(2-methoxyethoxy)aluminum hydride in toluene (Red-Al, 70% wt, 149  $\mu\text{L}$ , 515  $\mu\text{mol}$ , 15.0 equiv) was added via syringe at 23  $^\circ\text{C}$ . The reaction flask was fitted with a reflux condenser and heated to 80  $^\circ\text{C}$ . After 1 h, the reaction mixture was allowed to cool to 23  $^\circ\text{C}$  and excess reducing reagent was quenched by the addition of saturated aqueous sodium sulfate solution (100  $\mu\text{L}$ ). The resulting heterogeneous mixture was stirred for 10 min and then solid anhydrous sodium sulfate was added. The mixture was filtered through a plug of Celite and the filter cake was rinsed with dichloromethane (15 mL). The filtrate was concentrated under reduced pressure. The resulting residue was purified by flash column chromatography on silica gel (eluent: 10% methanol  $\rightarrow$  10% methanol saturated with ammonium hydroxide in chloroform) to afford (-)-calycanthidine (**1**, 8.7 mg, 70.9%) as a white solid.

As a result of the slow conformational equilibration at ambient temperature, NMR spectra were collected at elevated temperature. Structural assignments were made using additional information from gCOSY, HSQC, and HMBC experiments also collected at elevated temperature.

$^1\text{H}$  NMR (500 MHz,  $\text{CDCl}_3$ , 50  $^\circ\text{C}$ ):  $\delta$  7.06 (d,  $J = 7.4$  Hz, 1H,  $\text{C}_4\text{H}$ ), 7.00 (d,  $J = 5.8$  Hz, 1H,  $\text{C}_4\text{H}$ ), 6.98 (app-t,  $J = 7.7$  Hz, 1H,  $\text{C}_6\text{H}$ ), 6.92 (app-t,  $J = 7.5$  Hz, 1H,  $\text{C}_6\text{H}$ ), 6.58 (app-t,  $J = 7.5$  Hz, 1H,  $\text{C}_5\text{H}$ ), 6.51 (app-t,  $J = 7.2$  Hz, 1H,  $\text{C}_5\text{H}$ ), 6.48 (d,  $J = 8.0$  Hz, 1H,  $\text{C}_7\text{H}$ ), 6.27 (d,  $J = 7.7$  Hz, 1H,  $\text{C}_7\text{H}$ ), 4.47 (s, 1H,  $\text{C}_{8a}\text{H}$ ), 4.37 (s, 1H,  $\text{C}_{8a}\text{H}$ ), 2.98 (s, 3H,  $\text{N}_8\text{CH}_3$ ), 2.65–3.41 (m, 6H,  $\text{C}_2\text{H}_a$ ,  $\text{C}_2\text{H}_b$ ,  $\text{C}_2\text{H}_c$ ,  $\text{C}_2\text{H}_d$ ,  $\text{C}_3\text{H}_a$ ,  $\text{C}_3\text{H}_b$ ), 2.38 (s, 3H,  $\text{N}_1\text{CH}_3$ ), 2.33 (s, 3H,  $\text{N}_1\text{CH}_3$ ), 2.01–1.93 (m, 2H,  $\text{C}_3\text{H}_b$ ,  $\text{C}_3\text{H}_c$ ).

$^{13}\text{C}$  NMR (125.8 MHz,  $\text{CDCl}_3$ , 50  $^\circ\text{C}$ ):  $\delta$  153.2 ( $\text{C}_{7a'}$ ), 151.2 ( $\text{C}_{7a}$ ), 133.6, ( $\text{C}_{4a}$ ), 133.1 ( $\text{C}_{4a}$ ), 128.4 ( $\text{C}_{6'}$ ), 128.2 ( $\text{C}_6$ ), 124.7 ( $\text{C}_4$ ), 124.0 ( $\text{C}_4'$ ), 118.6 ( $\text{C}_5$ ), 117.1 ( $\text{C}_5'$ ), 109.3 ( $\text{C}_7$ ), 106.2 ( $\text{C}_7'$ ), 92.4 ( $\text{C}_{8a'}$ ), 85.5 ( $\text{C}_{8a}$ ), 63.8 ( $\text{C}_{3a}$ ), 63.2 ( $\text{C}_{3a'}$ ), 52.9 ( $\text{C}_2$ ,  $\text{C}_2'$ ), 38.2 ( $\text{N}_1\text{CH}_3$ ), 37.3 ( $\text{N}_1\text{CH}_3$ ), 35.7 ( $\text{C}_3'$ ), 35.6 ( $\text{C}_3$ ), 35.6 ( $\text{N}_8\text{CH}_3$ ).

$^1\text{H}$  NMR (500 MHz, DMSO- $d_6$ , 100 °C):  $\delta$  7.04 (d,  $J = 7.6$  Hz, 1H, C $_4$ H), 6.94 (d,  $J = 7.2$  Hz, 1H, C $_4$ H), 6.89 (app-t,  $J = 7.4$  Hz, 1H, C $_6$ H), 6.80 (app-t,  $J = 7.2$  Hz, 1H, C $_6$ H), 6.45–6.40 (m, 2H, C $_5$ H, C $_5$ H), 6.38 (d,  $J = 7.6$  Hz, 1H, C $_7$ H), 6.26 (d,  $J = 7.8$  Hz, 1H, C $_7$ H), 5.90 (br-s, 1H, N $_8$ H), 4.54 (s, 1H, C $_{8a}$ H), 4.44 (s, 1H, C $_{8a}$ H), 2.93 (s, 3H, N $_8$ CH $_3$ ), 2.65–2.57 (m, 2H, C $_2$ H $_a$ , C $_2$ H $_a$ ), 2.43–2.33 (m, 4H, C $_2$ H $_b$ , C $_2$ H $_b$ , C $_3$ H $_a$ , C $_3$ H $_a$ ), 2.36 (s, 3H, N $_1$ CH $_3$ ), 2.30 (s, 3H, N $_1$ CH $_3$ ), 1.91–1.82 (m, 2H, C $_3$ H $_b$ , C $_3$ H $_b$ ).

$^{13}\text{C}$  NMR (125.8 MHz, DMSO- $d_6$ , 100 °C):  $\delta$  152.3 (C $_{7a}$ ), 151.2 (C $_{7a}$ ), 132.4, (2C, C $_{4a}$ , C $_{4a}$ ), 127.1 (C $_6$ ), 126.7 (C $_6$ ), 123.1 (C $_4$ ), 122.7 (C $_4$ ), 116.0 (C $_5$ ), 115.8 (C $_5$ ), 107.3 (C $_7$ ), 105.0 (C $_7$ ), 91.1 (C $_{8a}$ ), 84.1 (C $_{8a}$ ), 62.1 (C $_{3a}$ ), 62.0 (C $_{3a}$ ), 51.3 (C $_2$ ), 51.2 (C $_2$ ), 36.9 (N $_1$ CH $_3$ ), 35.7 (N $_1$ CH $_3$ ), 34.9 (C $_{3/3'}$ ), 34.6 (C $_{3/3'}$ ), 34.5 (N $_8$ CH $_3$ ).

FTIR (thin film)  $\text{cm}^{-1}$ : 3385 (br-w), 2929 (w), 2789 (w), 1603 (m), 1488 (w), 1249 (w).

HRMS (ESI) ( $m/z$ ): calc'd for C $_{23}$ H $_{29}$ N $_4$  [M+H] $^+$ : 361.2387, found: 361.2397.

$[\alpha]_D^{24}$ :  $-278$  ( $c = 0.28$ , MeOH).<sup>10</sup>

TLC (10% methanol in chloroform saturated ammonium hydroxide), R $_f$ : 0.55 (UV, CAM).

<sup>10</sup> Literature value:  $[\alpha]_D^{24} = -285.1$  ( $c$  1.992, MeOH), see G. Barger, A. Jacob, J. Madinaveitia *Trav. Chim.* 1938, **57**, 548.

Literature value:  $[\alpha]_D^{27} = -301$  ( $c$  0.97, MeOH), see E. A. Peterson, PhD Dissertation, University of California, Irvine, 2005.

**Table S1. Comparison of our <sup>1</sup>H NMR data for (–)-calycanthidine (1) with literature data (CDCl<sub>3</sub>):**

| Assignment          | Overman's Report <sup>11</sup><br>(–)-calycanthidine<br><sup>1</sup> H NMR, 500 MHz<br>CDCl <sub>3</sub> , 50 °C | Takayama's Report <sup>12</sup><br>(–)-calycanthidine<br><sup>1</sup> H NMR, 500 MHz<br>CDCl <sub>3</sub> , 50 °C | This Work<br>(–)-calycanthidine<br><sup>1</sup> H NMR, 500 MHz<br>CDCl <sub>3</sub> , 50 °C |
|---------------------|------------------------------------------------------------------------------------------------------------------|-------------------------------------------------------------------------------------------------------------------|---------------------------------------------------------------------------------------------|
| N1'-CH <sub>3</sub> | 2.41 (s, 3H)                                                                                                     | 2.38 (s, 3H)                                                                                                      | 2.38 (s, 3H)                                                                                |
| N1-CH <sub>3</sub>  | 2.36 (s, 3H)                                                                                                     | 2.33 (s, 3H)                                                                                                      | 2.33 (s, 3H)                                                                                |
| C2'                 | 2.68–2.42 (m, 2H)                                                                                                | 2.65–2.40 (m, 2H)                                                                                                 | 2.65–2.40 (m, 2H)                                                                           |
| C2                  | 2.68–2.42 (m, 2H)                                                                                                | 2.65–2.40 (m, 2H)                                                                                                 | 2.65–2.40 (m, 2H)                                                                           |
| C3'                 | 2.68–2.42 (m, 2H)                                                                                                | 2.65–2.40 (m, 2H)                                                                                                 | 2.65–2.40 (m, 2H)                                                                           |
| C3                  | 2.68–2.42 (m, 2H)                                                                                                | 2.65–2.40 (m, 2H)                                                                                                 | 2.65–2.40 (m, 2H)                                                                           |
| C3a                 | –                                                                                                                | –                                                                                                                 | –                                                                                           |
| C3a'                | –                                                                                                                | –                                                                                                                 | –                                                                                           |
| C4'                 | 7.10 (d, <i>J</i> = 7.3 Hz, 1H)                                                                                  | 7.07 (d, <i>J</i> = 7.3 Hz, 1H)                                                                                   | 7.06 (d, <i>J</i> = 7.4 Hz, 1H)                                                             |
| C4                  | 7.05 (d, <i>J</i> = 7.2 Hz, 1H)                                                                                  | 7.02 (d, <i>J</i> = 7.3, 1H)                                                                                      | 7.00 (d, <i>J</i> = 5.8 Hz, 1H)                                                             |
| C4a'                | –                                                                                                                | –                                                                                                                 | –                                                                                           |
| C4a                 | –                                                                                                                | –                                                                                                                 | –                                                                                           |
| C5'                 | 6.55 (t, <i>J</i> = 7.4 Hz, 1H)                                                                                  | 6.52 (dd, <i>J</i> = 7.3, 7.3 Hz, 1H)                                                                             | 6.51 (app-t, <i>J</i> = 7.2 Hz, 1H)                                                         |
| C5                  | 6.58 (t, <i>J</i> = 7.4 Hz, 1H)                                                                                  | 6.59 (dd, <i>J</i> = 7.3, 7.3 Hz, 1H)                                                                             | 6.58 (app-t, <i>J</i> = 7.5 Hz, 1H)                                                         |
| C6'                 | 7.01 (dd, <i>J</i> = 7.5, 7.7 Hz, 1H)                                                                            | 6.98 (dd, <i>J</i> = 7.3, 7.6 Hz, 1H)                                                                             | 6.98 (app-t, <i>J</i> = 7.7 Hz, 1H)                                                         |
| C6                  | 6.94 (dd, <i>J</i> = 7.5, 7.5 Hz, 1H)                                                                            | 6.92 (dd, <i>J</i> = 7.3, 7.6 Hz, 1H)                                                                             | 6.92 (app-t, <i>J</i> = 7.5 Hz, 1H)                                                         |
| C7'                 | 6.30 (d, <i>J</i> = 7.8 Hz, 1H)                                                                                  | 6.27 (d, <i>J</i> = 7.6 Hz, 1H)                                                                                   | 6.27 (d, <i>J</i> = 7.7 Hz, 1H)                                                             |
| C7                  | 6.50 (d, <i>J</i> = 7.8 Hz, 1H)                                                                                  | 6.48 (d, <i>J</i> = 7.6 Hz, 1H)                                                                                   | 6.48 (d, <i>J</i> = 8.0 Hz, 1H)                                                             |
| C7a'                | –                                                                                                                | –                                                                                                                 | –                                                                                           |
| C7a                 | –                                                                                                                | –                                                                                                                 | –                                                                                           |
| N8'-CH <sub>3</sub> | 3.01 (s, 3H)                                                                                                     | 2.98 (s, 1H)                                                                                                      | 2.98 (s, 1H)                                                                                |
| N8-H                | –                                                                                                                | –                                                                                                                 | –                                                                                           |
| C8a'                | 4.40 (s, 1H)                                                                                                     | 4.38 (s, 1H)                                                                                                      | 4.37 (s, 1H)                                                                                |
| C8a                 | 4.48 (s, 1H)                                                                                                     | 4.42 (s, 1H)                                                                                                      | 4.47 (s, 1H)                                                                                |

<sup>11</sup> E. A. Peterson, Ph.D. Dissertation, University of California, Irvine, 2005.

<sup>12</sup> H. Takayama, Y. Matsuda, K. Maubuchi, A. Ishida, M. Kitajima, and N. Aimi, *Tetrahedron*, 2004, **60**, 893.



**Table S2. Comparison of  $^{13}\text{C}$  NMR data of (–)-calycanthidine (1) with literature data ( $\text{CDCl}_3$ ):**

| Assignment          | Overman's Report <sup>11</sup><br>(–)-calycanthidine<br>$^{13}\text{C}$ NMR, 125.8 MHz<br>$\text{CDCl}_3$ , 50 °C | Takayama's Report <sup>12</sup><br>(–)-calycanthidine<br>$^{13}\text{C}$ NMR, 125.8 MHz<br>$\text{CDCl}_3$ , 50 °C | This Work<br>(–)-calycanthidine<br>$^{13}\text{C}$ NMR, 125.8 MHz<br>$\text{CDCl}_3$ , 50 °C | Chemical Shift<br>Difference<br>$\Delta\delta = \delta$ (this<br>work) – $\delta$ (ref<br>11) | Chemical Shift<br>Difference<br>$\Delta\delta = \delta$ (this<br>work) – $\delta$ (ref<br>12) |
|---------------------|-------------------------------------------------------------------------------------------------------------------|--------------------------------------------------------------------------------------------------------------------|----------------------------------------------------------------------------------------------|-----------------------------------------------------------------------------------------------|-----------------------------------------------------------------------------------------------|
| N1'-CH <sub>3</sub> | 37.9                                                                                                              | 37.9                                                                                                               | 38.2                                                                                         | 0.3                                                                                           | 0.3                                                                                           |
| N1-CH <sub>3</sub>  | 37.0                                                                                                              | 37.0                                                                                                               | 37.3                                                                                         | 0.3                                                                                           | 0.3                                                                                           |
| C2'                 | 52.6                                                                                                              | 52.6                                                                                                               | 52.9                                                                                         | 0.3                                                                                           | 0.3                                                                                           |
| C2                  | 52.6                                                                                                              | 52.6                                                                                                               | 52.9                                                                                         | 0.3                                                                                           | 0.3                                                                                           |
| C3'                 | 35.7                                                                                                              | 35.7                                                                                                               | 35.7                                                                                         | 0.0                                                                                           | 0.0                                                                                           |
| C3                  | 35.6                                                                                                              | 35.7                                                                                                               | 35.6                                                                                         | 0.0                                                                                           | -0.1                                                                                          |
| C3a'                | 62.9                                                                                                              | 62.8                                                                                                               | 63.2                                                                                         | 0.3                                                                                           | 0.4                                                                                           |
| C3a                 | 63.5                                                                                                              | 63.2                                                                                                               | 63.8                                                                                         | 0.3                                                                                           | 0.6                                                                                           |
| C4'                 | 123.6                                                                                                             | 123.6                                                                                                              | 124.0                                                                                        | 0.4                                                                                           | 0.4                                                                                           |
| C4                  | 124.4                                                                                                             | 124.4                                                                                                              | 124.7                                                                                        | 0.3                                                                                           | 0.3                                                                                           |
| C4a'                | 132.9                                                                                                             | 132.7                                                                                                              | 133.1                                                                                        | 0.2                                                                                           | 0.4                                                                                           |
| C4a                 | 133.4                                                                                                             | 133.3                                                                                                              | 133.6                                                                                        | 0.2                                                                                           | 0.3                                                                                           |
| C5'                 | 116.7                                                                                                             | 116.7                                                                                                              | 117.1                                                                                        | 0.4                                                                                           | 0.4                                                                                           |
| C5                  | 118.2                                                                                                             | 118.2                                                                                                              | 118.6                                                                                        | 0.4                                                                                           | 0.4                                                                                           |
| C6'                 | 128.1                                                                                                             | 128.1                                                                                                              | 128.4                                                                                        | 0.3                                                                                           | 0.3                                                                                           |
| C6                  | 127.8                                                                                                             | 127.9                                                                                                              | 128.2                                                                                        | 0.4                                                                                           | 0.3                                                                                           |
| C7'                 | 105.8                                                                                                             | 105.9                                                                                                              | 106.2                                                                                        | 0.4                                                                                           | 0.3                                                                                           |
| C7                  | 108.9                                                                                                             | 109.0                                                                                                              | 109.3                                                                                        | 0.4                                                                                           | 0.3                                                                                           |
| C7a'                | 152.9                                                                                                             | 152.8                                                                                                              | 153.2                                                                                        | 0.3                                                                                           | 0.4                                                                                           |
| C7a                 | 151.0                                                                                                             | 150.8                                                                                                              | 151.2                                                                                        | 0.2                                                                                           | 0.4                                                                                           |
| N8'-CH <sub>3</sub> | 35.4                                                                                                              | 35.4                                                                                                               | 35.6                                                                                         | 0.2                                                                                           | 0.2                                                                                           |
| N8-H                | –                                                                                                                 | –                                                                                                                  | –                                                                                            | –                                                                                             | –                                                                                             |
| C8a'                | 92.1                                                                                                              | 91.8                                                                                                               | 92.4                                                                                         | 0.3                                                                                           | 0.6                                                                                           |
| C8a                 | 85.1                                                                                                              | 85.0                                                                                                               | 85.5                                                                                         | 0.4                                                                                           | 0.5                                                                                           |

**Table S3. Comparison of our <sup>1</sup>H NMR data for (–)-calycanthidine (1) with literature data (DMSO-*d*<sub>6</sub>):**

| Assignment          | Overman's Report <sup>13</sup><br>(–)-calycanthidine<br><sup>1</sup> H NMR, 500 MHz<br>DMSO- <i>d</i> <sub>6</sub> , 100 °C | This Work<br>(–)-calycanthidine<br><sup>1</sup> H NMR, 500 MHz<br>DMSO- <i>d</i> <sub>6</sub> , 100 °C |
|---------------------|-----------------------------------------------------------------------------------------------------------------------------|--------------------------------------------------------------------------------------------------------|
| N1'-CH <sub>3</sub> | 2.40 (m, 3H)                                                                                                                | 2.36 (s, 3H)                                                                                           |
| N1-CH <sub>3</sub>  | 2.33 (s, 3H)                                                                                                                | 2.30 (s, 3H)                                                                                           |
| C2'                 | 2.68–2.59 (m, 2H)<br>2.51–2.42 (m, 2H)                                                                                      | 2.65–2.57 (m, 2H)<br>2.43–2.33 (m, 2H)                                                                 |
| C2                  | 2.68–2.59 (m, 2H)<br>2.51–2.42 (m, 2H)                                                                                      | 2.65–2.57 (m, 2H)<br>2.43–2.33 (m, 2H)                                                                 |
| C3'                 | 2.40–2.36 (m, 1H)<br>2.00–1.86 (m, 2H)                                                                                      | 2.43–2.33 (m, 2H)<br>1.91–1.82 (m, 2H)                                                                 |
| C3                  | 2.51–2.42 (m, 2H)<br>2.00–1.86 (m, 2H)                                                                                      | 2.43–2.33 (m, 2H)<br>1.91–1.82 (m, 2H)                                                                 |
| C3a                 | –                                                                                                                           | –                                                                                                      |
| C3a'                | –                                                                                                                           | –                                                                                                      |
| C4'                 | 7.08 (dd, <i>J</i> = 7.4, 0.8 Hz, 1H)                                                                                       | 7.04 (d, <i>J</i> = 7.6 Hz, 1H)                                                                        |
| C4                  | 6.99 (d, <i>J</i> = 7.4 Hz, 1H)                                                                                             | 6.94 (d, <i>J</i> = 7.2 Hz, 1H)                                                                        |
| C4a'                | –                                                                                                                           | –                                                                                                      |
| C4a                 | –                                                                                                                           | –                                                                                                      |
| C5'                 | 6.49–6.41 (m, 2H)                                                                                                           | 6.45–6.40 (m, 2H)                                                                                      |
| C5                  | 6.49–6.41 (m, 2H)                                                                                                           | 6.45–6.40 (m, 2H)                                                                                      |
| C6'                 | 6.92 (app-dt, <i>J</i> = 7.7, 1.2 Hz, 1H)                                                                                   | 6.89 (app-t, <i>J</i> = 7.4 Hz, 1H)                                                                    |
| C6                  | 6.84 (app-dt, <i>J</i> = 7.6, 1.2 Hz, 1H)                                                                                   | 6.80 (app-t, <i>J</i> = 7.2 Hz, 1H)                                                                    |
| C7'                 | 6.28 (d, <i>J</i> = 7.8 Hz, 1H)                                                                                             | 6.26 (d, <i>J</i> = 7.8 Hz, 1H)                                                                        |
| C7                  | 6.49 (d, <i>J</i> = 7.8 Hz, 1H)                                                                                             | 6.38 (d, <i>J</i> = 7.6 Hz, 1H) <sup>14</sup>                                                          |
| C7a'                | –                                                                                                                           | –                                                                                                      |
| C7a                 | –                                                                                                                           | –                                                                                                      |
| N8'-CH <sub>3</sub> | 2.96 (s, 3H)                                                                                                                | 2.93 (s, 3H)                                                                                           |
| N8-H                | 5.83 (s br, 1H)                                                                                                             | 5.90 (s br, 1H)                                                                                        |
| C8a'                | 4.45 (s, 1H)                                                                                                                | 4.44 (s, 1H)                                                                                           |
| C8a                 | 4.55 (s, 1H)                                                                                                                | 4.54 (s, 1H)                                                                                           |

<sup>13</sup> L. E. Overman and E. A. Peterson, *Tetrahedron* 2003, **59**, 6905.

<sup>14</sup> Our assignment of these resonances is supported by key gCOSY, HSCQ, and HMBC correlations.

**Table S4. Comparison of  $^{13}\text{C}$  NMR data of (–)-calycanthidine (1) with literature data (DMSO- $d_6$ ):**

| Assignment          | Overman's Report <sup>13</sup><br>(–)-calycanthidine<br>$^{13}\text{C}$ NMR, 125.8 MHz<br>DMSO- $d_6$ , 100 °C | This Work<br>(–)-calycanthidine<br>$^{13}\text{C}$ NMR, 125.8 MHz<br>DMSO- $d_6$ , 100 °C | Chemical Shift<br>Difference<br>$\Delta\delta = \delta$ (this work) – $\delta$ (ref<br>13) |
|---------------------|----------------------------------------------------------------------------------------------------------------|-------------------------------------------------------------------------------------------|--------------------------------------------------------------------------------------------|
| N1'-CH <sub>3</sub> | 36.9                                                                                                           | 36.9                                                                                      | 0.0                                                                                        |
| N1-CH <sub>3</sub>  | 35.6                                                                                                           | 35.7                                                                                      | 0.1                                                                                        |
| C2'                 | 51.3                                                                                                           | 51.3                                                                                      | 0.0                                                                                        |
| C2                  | 51.2                                                                                                           | 51.2                                                                                      | 0.0                                                                                        |
| C3'/3               | 34.9 or 34.6                                                                                                   | 34.9 or 34.6                                                                              | 0.0                                                                                        |
| C3a'                | 62.1                                                                                                           | 62.1                                                                                      | 0.0                                                                                        |
| C3a                 | 62.0                                                                                                           | 62.0                                                                                      | 0.0                                                                                        |
| C4'                 | 122.7                                                                                                          | 122.7                                                                                     | 0.0                                                                                        |
| C4                  | 123.1                                                                                                          | 123.1                                                                                     | 0.0                                                                                        |
| C4a'                | 132.4                                                                                                          | 132.4                                                                                     | 0.0                                                                                        |
| C4a                 | 132.4                                                                                                          | 132.4                                                                                     | 0.0                                                                                        |
| C5'                 | 115.7                                                                                                          | 115.8                                                                                     | 0.1                                                                                        |
| C5                  | 115.9                                                                                                          | 116.0                                                                                     | 0.1                                                                                        |
| C6'                 | 127.0                                                                                                          | 127.1                                                                                     | 0.1                                                                                        |
| C6                  | 126.7                                                                                                          | 126.7                                                                                     | 0.0                                                                                        |
| C7'                 | 104.9                                                                                                          | 105.0                                                                                     | 0.1                                                                                        |
| C7                  | 107.2                                                                                                          | 107.3                                                                                     | 0.1                                                                                        |
| C7a'                | 152.3                                                                                                          | 152.3                                                                                     | 0.0                                                                                        |
| C7a                 | 151.2                                                                                                          | 151.2                                                                                     | 0.0                                                                                        |
| N8'-CH <sub>3</sub> | 34.4                                                                                                           | 34.5                                                                                      | 0.1                                                                                        |
| N8-H                | –                                                                                                              | –                                                                                         | 0.0                                                                                        |
| C8a'                | 91.1                                                                                                           | 91.1                                                                                      | 0.0                                                                                        |
| C8a                 | 84.0                                                                                                           | 84.1                                                                                      | 0.1                                                                                        |

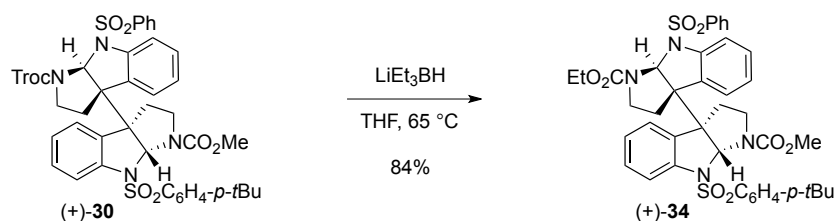

### N1'-Carboxyethyl Heterodimer (+)-34:

A solution of lithium triethylborohydride in tetrahydrofuran (1.0 M, 530  $\mu\text{L}$ , 530  $\mu\text{mol}$ , 10.0 equiv,) was added via syringe to a solution of heterodimer (+)-**30** (47.0 mg, 52.9  $\mu\text{mol}$ , 1 equiv) in tetrahydrofuran (2.70 mL) at 23  $^\circ\text{C}$ . The reaction flask was fitted with a reflux condenser and heated to 65  $^\circ\text{C}$ . After 11 h, another portion of lithium triethylborohydride (1.0 M in tetrahydrofuran, 265  $\mu\text{L}$ , 265  $\mu\text{mol}$ , 5.00 equiv,) was added and the mixture was stirred at 65  $^\circ\text{C}$ . After 12 h, the yellow solution was allowed to cool to 23  $^\circ\text{C}$  and a saturated aqueous ammonium chloride solution (10 mL) was added. The resulting suspension was extracted with dichloromethane (3  $\times$  15 mL). The combined organic extracts were washed with brine (10 mL), were dried over anhydrous sodium sulfate, were filtered, and were concentrated under reduced pressure. The resulting residue was purified by flash column chromatography on silica gel (eluent: 10 $\rightarrow$ 25% acetone in hexanes) to afford the N1'-carboxyethyl heterodimer (+)-**34** (35 mg, 84.1%) as a white foam.

As a result of the slow conformational equilibration at ambient temperature, NMR spectra were collected at elevated temperature. Structural assignments were made using additional information from gCOSY, HSQC, and HMBC experiments also collected at elevated temperature.

$^1\text{H}$  NMR (500 MHz,  $\text{CD}_3\text{CN}$ , 70  $^\circ\text{C}$ ):  $\delta$  7.88 (d,  $J$  = 7.5 Hz, 2H,  $\text{N}_8\text{SO}_2\text{Ph-}o\text{-H}$ ), 7.78 (d,  $J$  = 8.6 Hz, 2H,  $\text{N}_8\text{SO}_2\text{Ar-}o\text{-H}$ ), 7.62 (t,  $J$  = 7.5 Hz, 1H,  $\text{N}_8\text{SO}_2\text{Ph-}p\text{-H}$ ), 7.57 (d,  $J$  = 8.8 Hz, 2H,  $\text{N}_8\text{SO}_2\text{Ar-}m\text{-H}$ ), 7.52 (t, 2H,  $J$  = 8.0 Hz,  $\text{N}_8\text{SO}_2\text{Ph-}m\text{-H}$ ), 7.44–7.39 (m, 2H,  $\text{C}_{7/7'}\text{H}$ ), 7.32–7.27 (m, 2H,  $\text{C}_{6/6'}\text{H}$ ), 7.02–6.98 (m, 3H,  $\text{C}_{5/5'}\text{H}$ ,  $\text{C}_4\text{H}$ ), 6.93 (br-s, 1H,  $\text{C}_4\text{H}$ ), 6.44 (s, 1H,  $\text{C}_{8a}\text{H}$ ), 6.36 (s, 1H,  $\text{C}_{8a}\text{H}$ ), 4.08 (app-dq,  $J$  = 7.1, 10.6 Hz, 1H,  $\text{N1}'\text{CO}_2\text{CH}_a\text{H}_b\text{CH}_3$ ), 3.96 (app-dq,  $J$  = 7.1, 10.6 Hz, 1H,  $\text{N1}'\text{CO}_2\text{CH}_a\text{H}_b\text{CH}_3$ ), 3.80–3.76 (m, 2H,  $\text{C}_{2/2'}\text{H}_a$ ), 3.54 (s, 3H,  $\text{N}_1\text{CO}_2\text{CH}_3$ ), 2.67–2.56 (m, 2H,  $\text{C}_{2/2'}\text{H}_b$ ), 2.06 (dd,  $J$  = 5.1, 12.2 Hz, 1H,  $\text{C}_3\text{H}_a$ ), 2.02 (dd,  $J$  = 5.1, 12.3 Hz, 1H,  $\text{C}_3\text{H}_a$ ), 1.94–1.84 (m, 2H,  $\text{C}_{3/3'}\text{H}_b$ ), 1.34 (s, 9H,  $\text{C}(\text{CH}_3)_3$ ), 1.22 (t,  $J$  = 7.1 Hz, 3H,  $\text{N}_1\text{CO}_2\text{CH}_2\text{CH}_3$ ).

$^{13}\text{C}$  NMR (125.8 MHz,  $\text{CD}_3\text{CN}$ , 70  $^\circ\text{C}$ ):  $\delta$  158.9 ( $\text{N}_8\text{SO}_2\text{Ar-}p\text{-C}$ ), 156.1 ( $\text{N}_1\text{CO}_2\text{CH}_3$ ), 155.8 ( $\text{N}_1\text{CO}_2\text{CH}_2\text{CH}_3$ ), 145.2 ( $\text{C}_{7a'}$ ), 145.0 ( $\text{C}_{7a}$ ), 143.1 ( $\text{N}_8\text{SO}_2\text{Ph-}ipso\text{-C}$ ), 140.6 ( $\text{N}_8\text{SO}_2\text{Ar-}ipso\text{-C}$ ), 134.9 ( $\text{N}_8\text{SO}_2\text{Ph-}p\text{-C}$ ), 132.8 (2C,  $\text{C}_{4a}$ ,  $\text{C}_{4a'}$ ), 131.4 (2C,

C<sub>6</sub>, C<sub>6'</sub>), 131.1 (N<sub>8</sub>SO<sub>2</sub>Ph-*m*-C), 128.2 (N<sub>8</sub>SO<sub>2</sub>Ph-*o*-C), 128.1 (N<sub>8</sub>SO<sub>2</sub>Ar-*o*-C/*meta*), 126.5 (C<sub>4</sub>), 126.4 (C<sub>4'</sub>), 125.6 (2C, C<sub>5</sub>, C<sub>5'</sub>), 116.2 (C<sub>7</sub>/C<sub>7'</sub>), 116.0 (C<sub>7</sub>/C<sub>7'</sub>), 82.6 (2C, C<sub>8a</sub>, C<sub>8a'</sub>), 64.2 (2C, C<sub>3a</sub>, C<sub>3a'</sub>), 63.5 (N<sub>1</sub>CO<sub>2</sub>CH<sub>2</sub>CH<sub>3</sub>), 54.0 (N<sub>1</sub>CO<sub>2</sub>CH<sub>3</sub>), 46.9 (2C, C<sub>2</sub>, C<sub>2'</sub>), 37.6 (C<sub>3'</sub>), 37.5 (C<sub>3</sub>), 36.7 (C(CH<sub>3</sub>)<sub>3</sub>), 32.1 (C(CH<sub>3</sub>)<sub>3</sub>), 15.6 (N<sub>1</sub>CO<sub>2</sub>CH<sub>2</sub>CH<sub>3</sub>).

FTIR (thin film) cm<sup>-1</sup>: 2957 (w), 1712 (s), 1595 (w), 1477 (m), 1350 (m).

HRMS (ESI) (*m/z*): calc'd for C<sub>41</sub>H<sub>44</sub>N<sub>4</sub>NaO<sub>8</sub>S<sub>2</sub> [M+Na]<sup>+</sup>: 807.2493, found: 807.2492.

[α]<sub>D</sub><sup>24</sup>: +6.5 (*c* = 0.31, CH<sub>2</sub>Cl<sub>2</sub>).

TLC (33% ethyl acetate in hexanes), R<sub>f</sub>: 0.29 (UV, CAM).

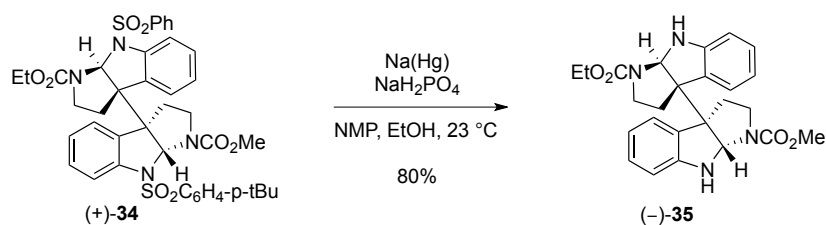

**(-)-N1-Carboxymethyl-N1'-Carboxyethyl *meso*-Chimonanthine (35):**

Sodium amalgam (5%-Na, 58.0 mg, 128  $\mu\text{mol}$ , 20.0 equiv)<sup>8</sup> was added to a suspension of sodium phosphate monobasic monohydrate (19.0 mg, 141.0  $\mu\text{mol}$ , 22.0 equiv) and N1'-carboxyethyl heterodimer (+)-**34** (5.0 mg, 6.40  $\mu\text{mol}$ , 1 equiv) in a mixture of ethanol-*N*-methylpyrrolidinone (2:1, 900  $\mu\text{L}$ ) at 23 °C. After 45 min, another portion of sodium phosphate monobasic monohydrate (19.0 mg, 141  $\mu\text{mol}$ , 22.0 equiv) and sodium amalgam (5%-Na, 58.0 mg, 128  $\mu\text{mol}$ , 20.0 equiv) were added. After an additional 1h, a final portion of sodium phosphate monobasic monohydrate (19.0 mg, 141  $\mu\text{mol}$ , 22.0 equiv) and sodium amalgam (5%-Na, 58.0 mg, 128  $\mu\text{mol}$ , 20.0 equiv) were added. After 1 h, the reaction mixture was diluted with ethyl acetate (10 mL) and was washed with 5% aqueous sodium bicarbonate solution (5 mL). The aqueous phase was separated and extracted with ethyl acetate (2  $\times$  10 mL). The combined organic layers were washed with brine (5 mL), were dried over anhydrous sodium sulfate, were filtered, and were concentrated under reduced pressure. The resulting residue was purified by flash column chromatography on silica gel (eluent: 33 $\rightarrow$ 50% ethyl acetate in hexanes) to afford (-)-N1-carboxymethyl-N1'-carboxyethyl *meso*-chimonanthine (**35**, 2.3 mg, 80.1%) as a white solid.

As a result of the slow conformational equilibration at ambient temperature, NMR spectra were collected at elevated temperature. Structural assignments were made using additional information from gCOSY, HSQC, and HMBC experiments also collected at elevated temperature.

<sup>1</sup>H NMR (500 MHz CD<sub>3</sub>CN, 75 °C):  $\delta$  7.05 (app-t,  $J$  = 7.4 Hz, 2H, C<sub>6</sub>H, C<sub>6</sub>H), 6.69 (d,  $J$  = 7.4 Hz, 1H, C<sub>4</sub>), 6.66 (d,  $J$  = 6.8 Hz, 1H, C<sub>4'</sub>), 6.61–6.57 (m, 2H, C<sub>5</sub>H, C<sub>5</sub>H), 6.53–6.49 (m, 2H, C<sub>7</sub>H, C<sub>7</sub>H), 5.39 (s, 1H), 5.38 (s, 1H), 5.06 (br-s, 2H, N<sub>8</sub>H, N<sub>8</sub>H), 4.13 (q,  $J$  = 6.7, 13.7 Hz, 2H, N<sub>1</sub>CO<sub>2</sub>CH<sub>2</sub>CH<sub>3</sub>), 3.71–3.65 (m, 5H, C<sub>2</sub>H<sub>a</sub>, C<sub>2</sub>H<sub>a</sub>, N<sub>1</sub>CO<sub>2</sub>CH<sub>3</sub>), 2.92–2.84 (m, 2H, C<sub>2</sub>H<sub>b</sub>, C<sub>2</sub>H<sub>b</sub>), 2.40–2.32 (m, 2H, C<sub>3</sub>H<sub>a</sub>, C<sub>3</sub>H<sub>a</sub>), 2.31–2.25 (m, 2H, C<sub>3</sub>H<sub>b</sub>, C<sub>3</sub>H<sub>b</sub>), 1.26 (t,  $J$  = 6.6 Hz, 3H, N<sub>1</sub>CO<sub>2</sub>CH<sub>2</sub>CH<sub>3</sub>).

<sup>13</sup>C NMR (125.8 MHz, CD<sub>3</sub>CN, 75 °C):  $\delta$  152.7 (2C, C<sub>7a</sub>, C<sub>7a'</sub>), 131.4 (2C, C<sub>4a</sub>, C<sub>4a'</sub>), 130.6 (2C, C<sub>6</sub>, C<sub>6'</sub>), 126.1 (2C, C<sub>4</sub>, C<sub>4'</sub>), 120.0 (2C, C<sub>5</sub>, C<sub>5'</sub>), 110.7 (2C, C<sub>7</sub>, C<sub>7'</sub>), 79.4 (2C, C<sub>8a</sub>, C<sub>8a'</sub>), 62.7 (N<sub>1</sub>CO<sub>2</sub>CH<sub>2</sub>CH<sub>3</sub>), 53.6 (N<sub>1</sub>CO<sub>2</sub>CH<sub>3</sub>), 46.9 (2C, C<sub>2</sub>, C<sub>2'</sub>), 35.6 (2C, C<sub>3</sub>, C<sub>3'</sub>), 15.9 (N<sub>1</sub>CO<sub>2</sub>CH<sub>2</sub>CH<sub>3</sub>).<sup>15</sup>

<sup>15</sup> The C<sub>3a</sub>, C<sub>3a'</sub>, and the carbonyl carbons of the carbamates were not observed, due to signal broadening even at 75 °C. All expected signals were observed in the following compound, *meso*-chimonanthine (**2**).

|                                             |                                                                                                                  |
|---------------------------------------------|------------------------------------------------------------------------------------------------------------------|
| FTIR (thin film) $\text{cm}^{-1}$ :         | 3360 (br-m), 2953 (w), 1693 (m), 1451 (w), 1381 (w).                                                             |
| HRMS (ESI) ( $m/z$ ):                       | calc'd for $\text{C}_{25}\text{H}_{29}\text{N}_4\text{O}_4$ $[\text{M}+\text{H}]^+$ : 449.2183: found: 449.2182. |
| $[\alpha]_{\text{D}}^{24}$ :                | -6.2 ( $c = 0.20$ , $\text{CH}_2\text{Cl}_2$ ).                                                                  |
| TLC (50% ethyl acetate in hexanes), $R_f$ : | 0.24 (UV, CAM).                                                                                                  |

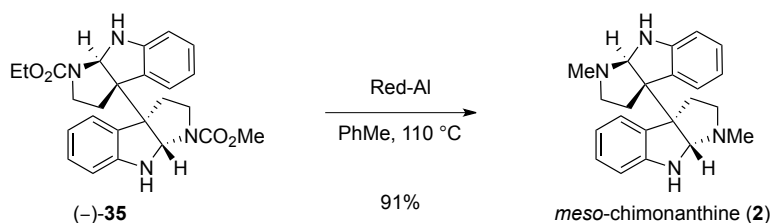

### **meso-Chimonanthine (2):**

(-)-N1-Carboxymethyl-N1'-carboxyethyl *meso*-chimonanthine (**35**, 30.0 mg, 66.9  $\mu\text{mol}$ , 1 equiv) was azeotropically dried from anhydrous benzene ( $2 \times 5 \text{ mL}$ ) and the residue was dissolved in toluene (6.5 mL). Sodium bis(2-methoxyethoxy)aluminum hydride in toluene (Red-Al, 70% wt, 193  $\mu\text{L}$ , 670  $\mu\text{mol}$ , 10.0 equiv) was added via syringe at 23  $^\circ\text{C}$ . The reaction flask was fitted with a reflux condenser and heated to 110  $^\circ\text{C}$ . After 1.5 h, the reaction mixture was allowed to cool to 23  $^\circ\text{C}$ . Excess reducing reagent was quenched by the addition of 10% methanol in chloroform saturated with ammonium hydroxide. The resulting mixture was concentrated under reduced pressure. The resulting residue was purified by flash column chromatography on silica gel (eluent: 10% methanol in chloroform saturated with ammonium hydroxide) to afford *meso*-chimonanthine (**2**, 21.0 mg, 90.5%) as a white solid.

As a result of the slow conformational equilibration at ambient temperature, NMR spectra were collected at elevated temperature. Structural assignments were made using additional information from gCOSY, HSQC, and HMBC experiments also collected at elevated temperature.

$^1\text{H}$  NMR (500 MHz,  $\text{CD}_3\text{OD}$ , 55  $^\circ\text{C}$ ):  $\delta$  6.94 (app-t,  $J = 7.2 \text{ Hz}$ , 2H,  $\text{C}_6\text{H}$ ,  $\text{C}_6'\text{H}$ ), 6.47 (br-s, 2H,  $\text{C}_5\text{H}$ ,  $\text{C}_5'\text{H}$ ), 6.45 (d,  $J = 7.8 \text{ Hz}$ ,  $\text{C}_7\text{H}$ ,  $\text{C}_7'\text{H}$ ), 4.54 (s, 2H,  $\text{C}_{8a}\text{H}$ ,  $\text{C}_{8a}'\text{H}$ ), 2.72 (ddd,  $J = 2.3, 6.1, 8.8 \text{ Hz}$ ,  $\text{C}_2\text{H}_a$ ,  $\text{C}_2'\text{H}_a$ ), 2.54–2.46 (m, 2H,  $\text{C}_3\text{H}_a$ ,  $\text{C}_3'\text{H}_a$ ), 2.41 (app-dt,  $J = 5.6, 8.9 \text{ Hz}$ , 2H,  $\text{C}_2\text{H}_b$ ,  $\text{C}_2'\text{H}_b$ ), 2.34 (s, 6H,  $\text{N}_1\text{CH}_3$ ,  $\text{N}_1'\text{CH}_3$ ), 2.05 (ddd,  $J = 2.9, 5.2, 11.8 \text{ Hz}$ , 2H,  $\text{C}_3\text{H}_b$ ,  $\text{C}_3'\text{H}_b$ ).<sup>16</sup>

$^{13}\text{C}$  NMR (125.8 MHz,  $\text{CD}_3\text{OD}$ , 55 $^\circ\text{C}$ ):  $\delta$  153.7 (2C,  $\text{C}_{7a}$ ,  $\text{C}_{7a}'$ ), 134.3 (2C,  $\text{C}_{4a}$ ,  $\text{C}_{4a}'$ ), 129.2 (2C,  $\text{C}_6$ ,  $\text{C}_6'$ ), 125.5 (2C,  $\text{C}_4$ ,  $\text{C}_4'$ ), 118.8 (2C,  $\text{C}_5$ ,  $\text{C}_5'$ ), 109.7 (2C,  $\text{C}_7$ ,  $\text{C}_7'$ ), 84.7 (2C,  $\text{C}_{8a}$ ,  $\text{C}_{8a}'$ ), 65.1 (2C,  $\text{C}_{3a}$ ,  $\text{C}_{3a}'$ ), 53.7 (2C,  $\text{C}_2$ ,  $\text{C}_2'$ ), 37.4 (2C,  $\text{C}_3$ ,  $\text{C}_3'$ ), 36.5 ( $\text{N}_1\text{CH}_3$ ,  $\text{N}_1'\text{CH}_3$ ).

$^1\text{H}$  NMR (500 MHz,  $\text{DMSO}-d_6$ , 120  $^\circ\text{C}$ ):  $\delta$  6.86 (app-t,  $J = 7.7 \text{ Hz}$ , 2H,  $\text{C}_6\text{H}$ ,  $\text{C}_6'\text{H}$ ), 6.54 (br-s, 2H,  $\text{C}_4\text{H}$ ,  $\text{C}_4'\text{H}$ ), 6.40–6.33 (m, 4H,  $\text{C}_5\text{H}$ ,  $\text{C}_5'\text{H}$ ,  $\text{C}_7\text{H}$ ,  $\text{C}_7'\text{H}$ ), 5.45 (s, 1H,  $\text{N}_8\text{H}$ ,  $\text{N}_8'\text{H}$ ), 4.58 (s, 2H,  $\text{C}_{8a}\text{H}$ ,  $\text{C}_{8a}'\text{H}$ ), 2.69 (ddd,  $J = 1.8, 6.8, 8.8 \text{ Hz}$ ,  $\text{C}_2\text{H}_a$ ,  $\text{C}_2'\text{H}_a$ ), 2.48–2.43 (m, 2H,  $\text{C}_3\text{H}_a$ ,  $\text{C}_3'\text{H}_a$ ), 2.35–2.32 (m, 2H,

<sup>16</sup> The  $\text{C}_4\text{H}$  and  $\text{C}_{4a}\text{H}$  were not observed, due to signal broadening even at 55  $^\circ\text{C}$ . All expected signals were observed in  $\text{DMSO}-d_6$  at 120  $^\circ\text{C}$ .



$C_2H_b, C_2'H_b$ , 2.30 (s, 6H,  $N_1CH_3, N_1'CH_3$ ), 1.88 (ddd,  $J = 1.8, 5.5, 11.6$  Hz, 2H,  $C_3H_b, C_3'H_b$ ).

$^{13}C$  NMR (125.8 MHz, DMSO- $d_6$ , 120°C):  $\delta$  151.9 (2C,  $C_{7a}, C_{7a'}$ ), 132.3 (2C,  $C_{4a}, C_{4a'}$ ), 126.7 (2C,  $C_6, C_6'$ ), 123.1 (2C,  $C_4, C_4'$ ), 115.4 (2C,  $C_5, C_5'$ ), 106.7 (2C,  $C_7, C_7'$ ), 82.5 (2C  $C_{8a}, C_{8a'}$ ), 62.6 (2C,  $C_{3a}, C_{3a'}$ ), 51.1 (2C,  $C_2, C_2'$ ), 36.1 (2C,  $C_3, C_3'$ ), 34.8 ( $N_1CH_3, N_1'CH_3$ ).

FTIR (thin film)  $cm^{-1}$ : 3380 (w), 2929 (w), 1604 (m), 1485 (m), 1347 (w).

HRMS (ESI) ( $m/z$ ): calc'd for  $C_{22}H_{27}N_4$   $[M+H]^+$ : 347.223, found: 347.2232.

TLC (18% methanol, 2% ammonium hydroxide in chloroform),  $R_f$ : 0.3 (UV, CAM).

**Table S5. Comparison of our  $^1\text{H}$  NMR data for *meso*-chimonanthine (2) with literature data ( $\text{CD}_3\text{OD}$ ):**

| Assignment     | Overman's Report <sup>17</sup><br><i>meso</i> -chimonanthine<br>$^1\text{H}$ NMR, 500 MHz<br>$\text{CD}_3\text{OD}$ | This Work<br><i>meso</i> -chimonanthine<br>$^1\text{H}$ NMR, 500 MHz<br>$\text{CD}_3\text{OD}$ , 55 °C |
|----------------|---------------------------------------------------------------------------------------------------------------------|--------------------------------------------------------------------------------------------------------|
| N1-CH3/N1'-CH3 | 2.30 (br-s, 6H)                                                                                                     | 2.34 (s, 6H)                                                                                           |
| C2/2'          | 2.49 (br-m, 4H)                                                                                                     | 2.72 (ddd, $J = 2.3, 6.1, 8.8$ Hz, 2H)<br>2.41 (app-dt, $J = 5.6, 8.9$ Hz, 2H)                         |
| C3/3'          | 2.02 (br-m, 4H)                                                                                                     | 2.54–2.46 (m, 2H)<br>2.05 (ddd, $J = 2.9, 5.2, 11.8$ Hz, 2H)                                           |
| C3a/3a'        | –                                                                                                                   | –                                                                                                      |
| C4a/4a'        | –                                                                                                                   | –                                                                                                      |
| C4/4'          | 6.89 (br-s, 4H)                                                                                                     | – <sup>16</sup>                                                                                        |
| C5/5'          | 6.39 (d, $J = 7.7$ Hz, 4H)                                                                                          | 6.47 (br-s, 2H)                                                                                        |
| C6/6'          | 6.89 (br-s, 4H)                                                                                                     | 6.94 (app-t, $J = 7.2$ Hz, 2H)                                                                         |
| C7/7'          | 6.39 (d, $J = 7.7$ Hz, 4H)                                                                                          | 6.45 (d, $J = 7.8$ Hz, 2H)                                                                             |
| C7a/7a'        | –                                                                                                                   | –                                                                                                      |
| N8/8'          | 4.38 (br-s, 2H)                                                                                                     | – <sup>18</sup>                                                                                        |
| C8a/8a'        | 2.67 (br-s, 2H)                                                                                                     | 4.54 (br-s, 2H) <sup>19</sup>                                                                          |

<sup>17</sup> J. T. Link and L. E. Overman *J. Am. Chem. Soc.* 1996, **118**, 8166.

<sup>18</sup> The resonance for this proton is not observed due to rapid deuterium exchange in  $\text{CD}_3\text{OD}$ . However, all expected signals are observed in  $\text{DMSO}-d_6$ , see Table S7.

<sup>19</sup> Our assignment of these resonances is supported by key HSCQ and HMBC correlations.

**Table S6. Comparison of  $^{13}\text{C}$  NMR data of *meso*-chimonanthine (2) with literature data ( $\text{CD}_3\text{OD}$ ):**

| Assignment                              | Overman's Report <sup>17</sup><br><i>meso</i> -chimonanthine<br>$^1\text{H}$ NMR, 500 MHz<br>$\text{CD}_3\text{OD}$ | This Work<br><i>meso</i> -chimonanthine<br>$^1\text{H}$ NMR, 500 MHz<br>$\text{CD}_3\text{OD}$ , 55 °C | Chemical Shift<br>Difference<br>$\Delta\delta = \delta$ (this work) – $\delta$<br>(ref 17) |
|-----------------------------------------|---------------------------------------------------------------------------------------------------------------------|--------------------------------------------------------------------------------------------------------|--------------------------------------------------------------------------------------------|
| N1-CH <sub>3</sub> /N1'-CH <sub>3</sub> | –                                                                                                                   | 36.5 <sup>19</sup>                                                                                     | –                                                                                          |
| C2/2'                                   | 53.5                                                                                                                | 53.7                                                                                                   | 0.2                                                                                        |
| C3/3'                                   | 37.1                                                                                                                | 37.4                                                                                                   | 0.3                                                                                        |
| C3a/3a'                                 | 64.8                                                                                                                | 65.1                                                                                                   | 0.3                                                                                        |
| C4a/4a'                                 | 133.8                                                                                                               | 134.3                                                                                                  | 0.5                                                                                        |
| C4/4'                                   | 125.4                                                                                                               | 125.5                                                                                                  | 0.1                                                                                        |
| C5/5'                                   | 118.6                                                                                                               | 118.8                                                                                                  | 0.2                                                                                        |
| C6/6'                                   | 129.1                                                                                                               | 129.2                                                                                                  | 0.1                                                                                        |
| C7/7'                                   | 109.4                                                                                                               | 109.7                                                                                                  | 0.3                                                                                        |
| C7a/7a'                                 | 153.5                                                                                                               | 153.7                                                                                                  | 0.2                                                                                        |
| N8/8'                                   | –                                                                                                                   | –                                                                                                      | –                                                                                          |
| C8a/8a'                                 | 84.2                                                                                                                | 84.7                                                                                                   | 0.4                                                                                        |

**Table S7. Comparison of our  $^1\text{H}$  NMR data for *meso*-chimonanthine (2) with literature data (DMSO- $d_6$ ):**

| Assignment     | Willis's Report <sup>20</sup><br><i>meso</i> -chimonanthine<br>$^1\text{H}$ NMR, 500 MHz<br>DMSO- $d_6$ , 120 °C | This Work<br><i>meso</i> -chimonanthine<br>$^1\text{H}$ NMR, 500 MHz<br>DMSO- $d_6$ , 120 °C |
|----------------|------------------------------------------------------------------------------------------------------------------|----------------------------------------------------------------------------------------------|
| N1-CH3/N1'-CH3 | 2.28 (s, 6H)                                                                                                     | 2.30 (s, 6H)                                                                                 |
| C2/2'          | 2.74–2.64 (m, 2H)<br>2.52–2.43 (m, 2H)                                                                           | 2.69 (ddd, $J = 1.8, 6.8, 8.8$ Hz, 2H)<br>2.35–2.31 (m, 2H) <sup>21</sup>                    |
| C3/3'          | 2.37–2.29 (m, 2H)<br>1.92–1.86 (m, 2H)                                                                           | 2.48–2.43 (m, 2H) <sup>21</sup><br>1.88 (ddd, $J = 1.8, 5.5, 11.6$ Hz, 2H)                   |
| C3a/3a'        | –                                                                                                                | –                                                                                            |
| C4a/4a'        | –                                                                                                                | –                                                                                            |
| C4/4'          | 6.55 (br-s, 2H)                                                                                                  | 6.54 (br-s, 2H)                                                                              |
| C5/5'          | 6.40–6.34 (m, 2H)                                                                                                | 6.40–6.33 (m, 2H)                                                                            |
| C6/6'          | 6.87 (dd, $J = 7.6, 7.5$ Hz, 2H)                                                                                 | 6.86 (app-t, $J = 7.7$ Hz, 2H)                                                               |
| C7/7'          | 6.40–6.34 (m, 2H)                                                                                                | 6.40–6.33 (m, 2H)                                                                            |
| C7a/7a'        | –                                                                                                                | –                                                                                            |
| N8/8'          | 5.49 (br-s, 2H)                                                                                                  | 5.45 (br-s, 2H)                                                                              |
| C8a/8a'        | 4.58 (s, 2H)                                                                                                     | 4.58 (s, 2H)                                                                                 |

<sup>20</sup> R. H. Snell, R. L. Woodward, and M. C. Willis, *Angew. Chem., Int. Ed.* 2011, **50**, 9116.

<sup>21</sup> Our assignment of these resonances is supported by key gCOSY, HSCQ, and HMBC correlations.

**Table S8. Comparison of  $^{13}\text{C}$  NMR data of *meso*-chimonanthine (2) with literature data (DMSO- $d_6$ ):**

| Assignment     | Willis's Report <sup>20</sup><br><i>meso</i> -chimonanthine<br>$^1\text{H}$ NMR, 500 MHz<br>DMSO- $d_6$ , 120 °C | This Work<br><i>meso</i> -chimonanthine<br>$^1\text{H}$ NMR, 500 MHz<br>DMSO- $d_6$ , 120 °C | Chemical Shift<br>Difference<br>$\Delta\delta = \delta$ (this work) – $\delta$<br>(ref 20) |
|----------------|------------------------------------------------------------------------------------------------------------------|----------------------------------------------------------------------------------------------|--------------------------------------------------------------------------------------------|
| N1-CH3/N1'-CH3 | 22.6 <sup>22</sup>                                                                                               | 34.8                                                                                         | 12.2                                                                                       |
| C2/2'          | 52.2                                                                                                             | 51.1                                                                                         | -1.1                                                                                       |
| C3/3'          | 35.9                                                                                                             | 36.1                                                                                         | 0.2                                                                                        |
| C3a/3a'        | 63.7                                                                                                             | 62.6                                                                                         | -1.1                                                                                       |
| C4a/4a'        | 133.5                                                                                                            | 132.3                                                                                        | -1.2                                                                                       |
| C4/4'          | 124.3                                                                                                            | 123.1                                                                                        | -1.2                                                                                       |
| C5/5'          | 116.7                                                                                                            | 115.4                                                                                        | -1.3                                                                                       |
| C6/6'          | 127.8                                                                                                            | 126.7                                                                                        | -1.1                                                                                       |
| C7/7'          | 107.8                                                                                                            | 106.7                                                                                        | -1.1                                                                                       |
| C7a/7a'        | 153.1                                                                                                            | 151.9                                                                                        | -1.2                                                                                       |
| N8/8'          | –                                                                                                                | –                                                                                            | –                                                                                          |
| C8a/8a'        | 83.6                                                                                                             | 82.5                                                                                         | -1.1                                                                                       |

<sup>22</sup> The reported signal at 22.6 ppm is not visible in the  $^{13}\text{C}$  NMR spectrum of *meso*-chimonanthine provided in ref 20; however, in the same spectrum an unreported peak is observed at ~35 ppm consistent with our observation.

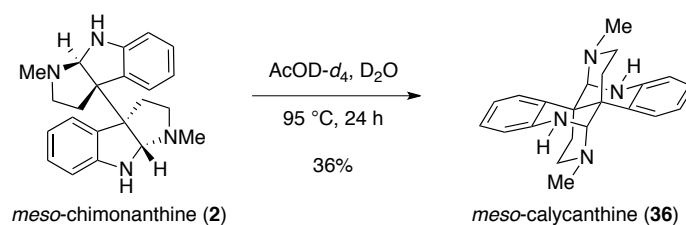

### ***meso*-Calycanthine (36):**

A solution of *meso*-chimonanthine (**2**, 20.0 mg, 57.7  $\mu$ mol, 1 equiv) in a mixture of acetic acid-*d*<sub>4</sub> (17  $\mu$ L, 0.43 M) in deuterium oxide (700  $\mu$ L) was placed in a standard NMR tube, capped with a plastic cap, sealed with Teflon tape, and heated to 95 °C. After 24 h, the mixture was allowed to cool to 23 °C and partitioned between dichloromethane (10 mL) and saturated aqueous sodium bicarbonate solution (10 mL). The layers were separated, and the aqueous layer was extracted with dichloromethane (2  $\times$  10 mL). The combined organic layers were washed with brine (5 mL), were dried over anhydrous sodium sulfate, were filtered, and were concentrated under reduced pressure. The resulting residue was purified by flash column chromatography on silica gel (eluent: 4.5% methanol, 0.5% ammonium hydroxide  $\rightarrow$  9% methanol, 1% ammonium hydroxide in chloroform) to afford *meso*-calycanthine (**36**, 7.2 mg, 36.0 %) as a white solid. Structural assignments were made using additional information from gCOSY, HSQC, and HMBC experiments.

<sup>1</sup>H NMR (500 MHz, CD<sub>2</sub>Cl<sub>2</sub>, 20 °C):  $\delta$  7.03–6.96 (m, 4H, C<sub>6/6'</sub>H, C<sub>4/4'</sub>H), 6.66 (dt, *J* = 1.3, 7.4 Hz, 2H, C<sub>5/5'</sub>H), 6.57 (dd, *J* = 0.8, 7.9 Hz, 2H, C<sub>7/7'</sub>H), 4.94 (br-s, 2H, N<sub>8/8'</sub>H), 4.28 (d, *J* = 3.8 Hz, 2H, C<sub>8a/8a'</sub>H), 2.36 (dd, *J* = 2.1, 7.9 Hz, 2H, C<sub>2/2'</sub>H<sub>a</sub>), 2.29 (s, 6H, N<sub>1/1'</sub>CH<sub>3</sub>), 2.20–2.09 (m, 4H, C<sub>2/2'</sub>H<sub>b</sub>, C<sub>3/3'</sub>H<sub>a</sub>), 1.20–1.11 (m, 2H, C<sub>3/3'</sub>H<sub>b</sub>).

<sup>13</sup>C NMR (125.8 MHz, CD<sub>2</sub>Cl<sub>2</sub>, 20 °C):  $\delta$  145.3 (2C, C<sub>7a</sub>, C<sub>7a'</sub>), 127.0 (2C, C<sub>4/6</sub>, C<sub>4'/6'</sub>), 126.9 (2C, C<sub>4/6</sub>, C<sub>4'/6'</sub>), 125.0 (2C, C<sub>4a</sub>, C<sub>4a'</sub>), 117.5 (2C, C<sub>5</sub>, C<sub>5'</sub>), 112.4 (2C, C<sub>7</sub>, C<sub>7'</sub>), 71.2 (2C, C<sub>8a</sub>, C<sub>8a'</sub>), 46.5 (2C, C<sub>2</sub>, C<sub>2'</sub>), 42.4 (N<sub>1</sub>CH<sub>3</sub>, N<sub>1'</sub>CH<sub>3</sub>), 37.3 (2C, C<sub>3a</sub>, C<sub>3a'</sub>), 34.6 (2C, C<sub>3</sub>, C<sub>3'</sub>).

FTIR (thin film) cm<sup>-1</sup>: 3438 (w br), 2964 (w), 1608 (m), 1487 (m), 1304 (w).

HRMS (ESI) (*m/z*): calc'd for C<sub>22</sub>H<sub>27</sub>N<sub>4</sub> [M+H]<sup>+</sup>: 347.2230, found: 347.2214.

TLC (18% methanol, 2% ammonium hydroxide in chloroform), R<sub>f</sub>: 0.63 (UV, CAM).

**Table S9. Comparison of  $^1\text{H}$  NMR data of *meso*-calycanthine (36) with literature data:**

| Assignment                              | Overman's Report <sup>17</sup><br><i>meso</i> -chimonanthine<br>$^1\text{H}$ NMR, 500 MHz<br>$\text{CD}_2\text{Cl}_2$ | This Work<br><i>meso</i> -chimonanthine<br>$^1\text{H}$ NMR, 500 MHz<br>$\text{CD}_2\text{Cl}_2$ , 20 °C |
|-----------------------------------------|-----------------------------------------------------------------------------------------------------------------------|----------------------------------------------------------------------------------------------------------|
| N1-CH <sub>3</sub> /N1'-CH <sub>3</sub> | 2.27 (s, 3H)                                                                                                          | 2.29 (s, 1H)                                                                                             |
| C2/2'                                   | 2.33 (m, 2H)<br>2.11 (m, 4H)                                                                                          | 2.36 (dd, $J = 2.1, 7.9$ Hz, 2H)<br>2.20–2.09 (m, 4H)                                                    |
| C3/3'                                   | 2.11 (m, 4H)<br>1.14 (m, 2H)                                                                                          | 2.20–2.09 (m, 4H)<br>1.20–1.11 (m, 2H)                                                                   |
| C3a/3a'                                 | –                                                                                                                     | –                                                                                                        |
| C4a/4a'                                 | –                                                                                                                     | –                                                                                                        |
| C4/4'                                   | 6.97 (m, 4H)                                                                                                          | 7.03–6.96 (m, 4H)                                                                                        |
| C5/5'                                   | 6.63 (t, $J = 7.5$ Hz, 2H)                                                                                            | 6.66 (app-dt, $J = 1.3, 7.4$ Hz, 2H)                                                                     |
| C6/6'                                   | 6.97 (m, 4H)                                                                                                          | 7.03–6.96 (m, 4H)                                                                                        |
| C7/7'                                   | 6.54 (d, $J = 7.9$ Hz, 2H)                                                                                            | 6.57 (dd, $J = 0.8, 7.9$ Hz, 2H)                                                                         |
| C7a/7a'                                 | –                                                                                                                     | –                                                                                                        |
| N8/8'                                   | 4.91 (s, 2H)                                                                                                          | 4.94 (br-s, 2H)                                                                                          |
| C8a/8a'                                 | 4.25 (s, 2H)                                                                                                          | 4.28 (d, $J = 3.8$ Hz, 2H)                                                                               |

**Table S10. Comparison of  $^{13}\text{C}$  NMR data of *meso*-calycanthine (36) with literature data:**

| Assignment                            | Overman's Report <sup>17</sup><br><i>meso</i> -chimonanthine<br>$^1\text{H}$ NMR, 500 MHz<br>$\text{CD}_2\text{Cl}_2$ | This Work<br><i>meso</i> -chimonanthine<br>$^1\text{H}$ NMR, 500 MHz<br>$\text{CD}_2\text{Cl}_2$ , 20 °C | Chemical Shift<br>Difference<br>$\Delta\delta = \delta$ (this work) – $\delta$<br>(ref 17) |
|---------------------------------------|-----------------------------------------------------------------------------------------------------------------------|----------------------------------------------------------------------------------------------------------|--------------------------------------------------------------------------------------------|
| N1- $\text{CH}_3$ /N1'- $\text{CH}_3$ | 42.2                                                                                                                  | 42.4                                                                                                     | 0.2                                                                                        |
| C2/2'                                 | 46.3                                                                                                                  | 46.3                                                                                                     | 0.0                                                                                        |
| C3/3'                                 | 34.4                                                                                                                  | 34.6                                                                                                     | 0.2                                                                                        |
| C3a/3a'                               | 37.2                                                                                                                  | 37.3                                                                                                     | 0.1                                                                                        |
| C4a/4a'                               | 124.9                                                                                                                 | 125.0                                                                                                    | 0.1                                                                                        |
| C4/4'                                 | 126.9 or 126.7                                                                                                        | 127.0 or 126.9                                                                                           | 0.0–0.3                                                                                    |
| C5/5'                                 | 117.4                                                                                                                 | 117.5                                                                                                    | 0.1                                                                                        |
| C6/6'                                 | 126.9 or 126.7                                                                                                        | 127.0 or 126.9                                                                                           | 0.0–0.3                                                                                    |
| C7/7'                                 | 112.3                                                                                                                 | 112.4                                                                                                    | 0.1                                                                                        |
| C7a/7a'                               | 145.1                                                                                                                 | 145.3                                                                                                    | 0.2                                                                                        |
| N8/8'                                 | –                                                                                                                     | –                                                                                                        | –                                                                                          |
| C8a/8a'                               | 71.1                                                                                                                  | 71.2                                                                                                     | 0.1                                                                                        |



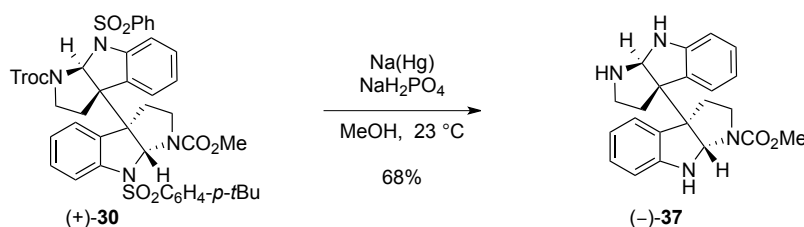

**(-)-N1-Carboxymethyl Desmethyl-*meso*-Chimonanthine (37):**

Sodium amalgam (5%-Na, 583 mg, 1.27 mmol, 25.0 equiv)<sup>8</sup> was added to a suspension of sodium phosphate monobasic monohydrate (196 mg, 1.43 mmol, 28.0 equiv) and heterodimer (+)-**30** (45.0 mg, 50.7  $\mu\text{mol}$ , 1 equiv) in methanol at 23  $^\circ\text{C}$ . After 1 h, another portion of sodium phosphate monobasic monohydrate (84.0 mg, 612  $\mu\text{mol}$ , 12.0 equiv) and sodium amalgam (5%-Na, 235 mg, 510  $\mu\text{mol}$ , 10.0 equiv) were added sequentially. After an additional 1 h, the reaction mixture was diluted with ethyl acetate (20 mL) and washed with a 5% aqueous sodium bicarbonate solution (10 mL). The aqueous phase was separated and extracted with ethyl acetate (2  $\times$  20 mL). The combined organic layers were washed with brine (10 mL), were dried over anhydrous sodium sulfate, were filtered, and were concentrated under reduced pressure. The resulting residue was purified by flash column chromatography on silica gel (eluent: 9% methanol, 1.0% ammonium hydroxide  $\rightarrow$  18% methanol, 2.0% ammonium hydroxide in chloroform) to afford the heterodimer (-)-N1-carboxymethyl desmethyl-*meso*-chimonanthine (**37**, 13.0 mg, 67.7%) as a white solid.

As a result of the slow conformational equilibration at ambient temperature, NMR spectra were collected at elevated temperature. Structural assignments were made using additional information from gCOSY, HSQC, and HMBC experiments also collected at elevated temperature.

<sup>1</sup>H NMR (500 MHz, CD<sub>3</sub>CN, 75  $^\circ\text{C}$ ):  $\delta$  7.04 (app-t,  $J$  = 7.6 Hz, 1H, C<sub>6</sub>H), 6.96 (app-t,  $J$  = 8.5 Hz, 1H, C<sub>6'</sub>H), 6.77 (d,  $J$  = 13.1 Hz, 1H, C<sub>4</sub>H), 6.59 (app-t,  $J$  = 7.4 Hz, 1H, C<sub>5</sub>H), 6.52–6.46 (m, 3H, C<sub>5</sub>H, C<sub>7</sub>H, C<sub>4</sub>H), 6.44 (d,  $J$  = 7.8 Hz, 1H, C<sub>7</sub>H), 5.32 (s, 1H, C<sub>8a</sub>H), 5.01 (br-s, 1H, NH), 4.92 (s, 1H, C<sub>8a</sub>H), 3.74–3.67 (m, 1H C<sub>2</sub>H<sub>a</sub>), 3.69 (s, 3H, N<sub>1</sub>CO<sub>2</sub>CH<sub>3</sub>), 3.00 (dd,  $J$  = 6.9, 10.3 Hz, 1H, C<sub>2</sub>H<sub>a</sub>), 2.94 (app-dt,  $J$  = 6.3, 11.1 Hz, 1H, C<sub>2</sub>H<sub>b</sub>), 2.58 (app-dt,  $J$  = 5.3, 10.9 Hz, 1H, C<sub>2</sub>H<sub>b</sub>), 2.47 (app-dt,  $J$  = 8.3, 12.1 Hz, 1H, C<sub>3</sub>H<sub>a</sub>), 2.40–2.05 (br-s, 1H, N<sub>1</sub>H), 2.32 (dd,  $J$  = 6.2, 12.4 Hz, 1H, C<sub>3</sub>H<sub>b</sub>), 2.18 (app-dt,  $J$  = 6.7, 11.7 Hz, 1H, C<sub>3</sub>H<sub>a</sub>), 2.07 (dd,  $J$  = 5.2, 11.8 Hz, 1H, C<sub>3</sub>H<sub>b</sub>).

<sup>13</sup>C NMR (125.8 MHz, CD<sub>3</sub>CN, 75  $^\circ\text{C}$ ):  $\delta$  155.6 (N<sub>1</sub>CO<sub>2</sub>CH<sub>3</sub>), 154.1 (C<sub>7a'</sub>), 152.7 (C<sub>7a</sub>), 133.1 (C<sub>4a'</sub>), 132.6 (C<sub>4a</sub>), 130.3 (C<sub>6</sub>), 129.9 (C<sub>6'</sub>), 126.4 (C<sub>4'</sub>), 126.1 (C<sub>4</sub>), 119.8 (C<sub>5</sub>), 119.2 (C<sub>5'</sub>), 110.4 (C<sub>7</sub>), 109.7 (C<sub>7'</sub>), 81.9 (C<sub>8a'</sub>), 79.8 (C<sub>8a</sub>), 65.7

(2C, C<sub>3a</sub>, C<sub>3a'</sub>), 53.5 (N<sub>1</sub>CO<sub>2</sub>CH<sub>3</sub>), 47.2 (C<sub>2'</sub>), 46.8 (C<sub>2</sub>), 40.3 (C<sub>3'</sub>), 36.2 (C<sub>3</sub>).

FTIR (thin film) cm<sup>-1</sup>: 3350 (br-m), 2954 (w), 1692 (s), 1606 (w), 1451 (m), 1385 (w).

HRMS (ESI) (*m/z*): calc'd for C<sub>22</sub>H<sub>25</sub>N<sub>4</sub>O<sub>2</sub> [M+H]<sup>+</sup>: 377.1972, found: 377.1976

[α]<sub>D</sub><sup>24</sup>: -223 (*c* = 0.32, CH<sub>2</sub>Cl<sub>2</sub>).

TLC (10% methanol in chloroform), R<sub>f</sub>: 0.18 (UV, CAM).

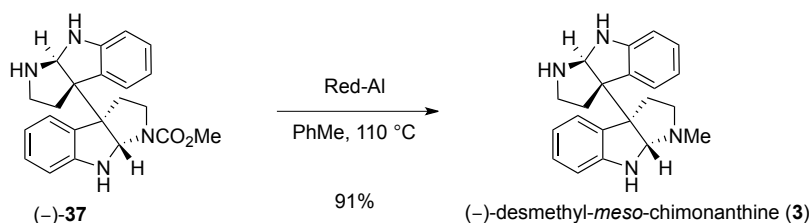

### **(-)-Desmethyl-*meso*-Chimonanthine (3):**

(-)-N1-Carboxymethyl-N1'-desmethyl-*meso*-chimonanthine (**37**, 20.0 mg, 53.1  $\mu\text{mol}$ , 1 equiv) was azeotropically dried from anhydrous benzene ( $2 \times 5$  mL) and the residue was dissolved in toluene (5.0 mL). A solution of sodium bis(2-methoxyethoxy)aluminum hydride in toluene (Red-Al, 70% wt, 153  $\mu\text{L}$ , 530  $\mu\text{mol}$ , 10.0 equiv) was added via syringe at 23 °C. The reaction flask was fitted with a reflux condenser and heated to 110 °C. After 1.5 h, the reaction mixture was allowed to cool to 23 °C. Excess reducing reagent was quenched by the addition of 10% methanol in chloroform saturated with ammonium hydroxide and then concentrated under reduced pressure. The resulting residue was purified by flash column chromatography on silica gel (eluent: gradient, 10% methanol in chloroform  $\rightarrow$  10% methanol in chloroform saturated with ammonium hydroxide) to afford (-)-desmethyl-*meso*-chimonanthine (**3**, 16.0 mg, 90.8%) as a white solid.

As a result of the slow conformational equilibration at ambient temperature, NMR spectra were collected at elevated temperature. Structural assignments were made using additional information from gCOSY, HSQC, and HMBC experiments also collected at elevated temperature.

#### Characterization in $\text{CDCl}_3$ at 50 °C<sup>23</sup>:

<sup>1</sup>H NMR (500 MHz,  $\text{CDCl}_3$ , 50 °C):

$\delta$  7.04–6.91 (m, 2H, C<sub>6</sub>H, C<sub>6'</sub>H), 6.64–6.50 (m, 4H, C<sub>5</sub>H, C<sub>5'</sub>H, C<sub>4</sub>H, C<sub>4'</sub>H), 6.46 (app t,  $J = 7.1$  Hz, 4H, C<sub>7</sub>H, C<sub>7'</sub>H), 5.02 (br-s, 1H, C<sub>8a</sub>H), 4.57 (br-s, 1H, C<sub>8a</sub>H), 3.07 (dd,  $J = 6.7, 10.6$  Hz, 1H, C<sub>2</sub>H<sub>a</sub>), 2.78 (ddd,  $J = 1.9, 6.6, 8.5$  Hz, 1H, C<sub>2</sub>H<sub>a</sub>), 2.72 (app-dt,  $J = 5.1, 11.1$  Hz, 1H, C<sub>2</sub>H<sub>b</sub>), 2.52–2.39 (m, 2H, C<sub>2</sub>H<sub>b</sub>, C<sub>3</sub>H<sub>a</sub>), 2.37 (s, 3H, N<sub>1</sub>CH<sub>3</sub>), 2.31 (app-dt,  $J = 6.9, 11.8$  Hz, 1H, C<sub>3</sub>H<sub>a</sub>), 2.15 (dd,  $J = 5.1, 11.9$  Hz, 2H, C<sub>3</sub>H<sub>b</sub>), 2.10–2.04 (m, 1H, C<sub>3</sub>H<sub>b</sub>).

<sup>13</sup>C NMR (125.8 MHz,  $\text{CDCl}_3$ , 50 °C):

$\delta$  152.0 (2C, C<sub>7a</sub>, C<sub>7a'</sub>), 133.4 (C<sub>4a</sub>), 132.2 (C<sub>4a'</sub>), 128.4 (2C, C<sub>6</sub>, C<sub>6'</sub>), 124.9 (C<sub>4/4'</sub>), 124.6 (C<sub>4/4'</sub>), 118.7 (2C, C<sub>5</sub>, C<sub>5'</sub>), 109.1 (C<sub>7/7'</sub>), 108.8 (C<sub>7/7'</sub>), 83.9 (C<sub>8a</sub>), 80.4 (C<sub>8a'</sub>), 64.7 (C<sub>3a'</sub>), 64.0 (C<sub>3a</sub>), 52.5 (C<sub>2</sub>), 45.8 (C<sub>2'</sub>), 38.7 (C<sub>3'</sub>), 37.1 (C<sub>3</sub>), 35.9 (N<sub>1</sub>CH<sub>3</sub>).

#### Characterization in $\text{DMSO}-d_6$ at 50 °C<sup>24</sup>

<sup>23</sup> We found data collection in  $\text{CDCl}_3$  at 50 °C provided optimal resolution for <sup>13</sup>C and <sup>1</sup>H NMR.

<sup>24</sup> <sup>1</sup>H and <sup>13</sup>C NMR were also obtained in  $\text{DMSO}-d_6$  for comparison with other natural products synthesized in this report.

$^1\text{H}$  NMR (500 MHz,  $\text{DMSO-}d_6$ , 100 °C):  $\delta$  6.90–6.84 (m, 2H,  $\text{C}_6\text{H}$ ,  $\text{C}_6'\text{H}$ ), 6.63 (br-s, 1H,  $\text{C}_4\text{H}$ ), 6.45–6.30 (m, 5H,  $\text{C}_4'\text{H}$ ,  $\text{C}_5\text{H}$ ,  $\text{C}_5'\text{H}$ ,  $\text{C}_7\text{H}$ ,  $\text{C}_7'\text{H}$ ), 5.52 (s, 1H,  $\text{N}_8\text{H}$ ), 5.40 (s, 1H,  $\text{N}_8'\text{H}$ ), 4.92 (s, 1H,  $\text{C}_{8a}\text{H}$ ), 4.51 (s, 1H,  $\text{C}_{8a}'\text{H}$ ), 2.97 (app-t,  $J = 9.1\text{ Hz}$ , 1H,  $\text{C}_2\text{H}_a$ ), 2.69 (app-t,  $J = 7.6\text{ Hz}$ , 1H,  $\text{C}_2\text{H}_a$ ), 2.45–2.25 (m, 4H,  $\text{C}_2\text{H}_b$ ,  $\text{C}_2'\text{H}_b$ ,  $\text{C}_3\text{H}_a$ ,  $\text{C}_3'\text{H}_a$ ), 2.29 (s, 3H,  $\text{N}_1\text{CH}_3$ ), 1.98 (dd,  $J = 5.1, 12.1\text{ Hz}$ , 1H,  $\text{C}_3\text{H}_b$ ), 1.90 (dd,  $J = 5.1, 11.5\text{ Hz}$ , 1H,  $\text{C}_3\text{H}_b$ ).

$^{13}\text{C}$  NMR (125.8 MHz,  $\text{DMSO-}d_6$ , 100 °C):  $\delta$  151.9 (2C,  $\text{C}_{7a}$ ,  $\text{C}_{7a}'$ ), 132.6 ( $\text{C}_{4a}$ ), 131.4 ( $\text{C}_{4a}'$ ), 126.8 (2C,  $\text{C}_6$ ,  $\text{C}_6'$ ), 123.2 ( $\text{C}_4$ ), 123.6 ( $\text{C}_4'$ ), 115.7 (2C,  $\text{C}_5$ ,  $\text{C}_5'$ ), 106.8 ( $\text{C}_7$ ), 106.3 ( $\text{C}_7'$ ), 82.6 ( $\text{C}_{8a}$ ), 79.2 ( $\text{C}_{8a}'$ ), 63.1 ( $\text{C}_{3a}'$ ), 62.3 ( $\text{C}_{3a}$ ), 51.2 ( $\text{C}_2$ ), 44.2 ( $\text{C}_2'$ ), 37.7 ( $\text{C}_3$ ), 36.4 ( $\text{C}_3$ ). 35.0 ( $\text{N}_1\text{CH}_3$ ).

Characterization in  $\text{CDCl}_3$  at  $-40\text{ }^\circ\text{C}$ <sup>25</sup>

$^1\text{H}$  NMR (500 MHz,  $\text{CDCl}_3$ ,  $-40\text{ }^\circ\text{C}$ ): *Major Rotamer:*  $\delta$  7.35–7.28 (m, 1H,  $\text{C}_4\text{H}$ ), 7.09 (app-t,  $J = 7.6\text{ Hz}$ , 1H,  $\text{C}_6'\text{H}$ ), 6.91 (app-t,  $J = 6.9\text{ Hz}$ , 1H,  $\text{C}_6\text{H}$ ), 6.80 (app-t,  $J = 7.4\text{ Hz}$ , 1H,  $\text{C}_5\text{H}$ ), 6.51–6.43 (m, 2H,  $\text{C}_{7/7'}\text{H}$ ), 6.30 (app-t,  $J = 7.2\text{ Hz}$ , 1H,  $\text{C}_5\text{H}$ ), 5.71–5.63 (m, 1H,  $\text{C}_4\text{H}$ ), 5.30 (br-s, 1H,  $\text{C}_{8a}\text{H}$ ), 4.93 (br-s, 1H,  $\text{N}_1\text{H}$ ), 4.55 (br-s, 1H,  $\text{N}_8\text{H}$ ), 4.29 (br-s, 1H,  $\text{C}_{8a}\text{H}$ ), 3.77 (br-s, 1H,  $\text{N}_8\text{H}$ ), 3.16–3.02 (m, 2H,  $\text{C}_2\text{H}_b$ ,  $\text{C}_2'\text{H}_a$ ), 2.60–2.45 (m, 2H,  $\text{C}_3\text{H}_a$ ,  $\text{C}_3\text{H}_b$ ), 2.27 (s, 3H,  $\text{N}_1\text{CH}_3$ ), 2.25–2.10 (m, 2H,  $\text{C}_2\text{H}_a$ ,  $\text{C}_2\text{H}_b$ ), 2.10–2.03 (m, 2H,  $\text{C}_3\text{H}_a$ ,  $\text{C}_3\text{H}_b$ ).

*Minor Rotamer:*  $\delta$  7.35–7.28 (m, 1H,  $\text{C}_4\text{H}$ ), 7.09 (app-t,  $J = 7.6\text{ Hz}$ , 1H,  $\text{C}_6'\text{H}$ ), 6.91 (app-t,  $J = 6.9\text{ Hz}$ , 1H,  $\text{C}_6\text{H}$ ), 6.80 (app-t,  $J = 7.4\text{ Hz}$ , 1H,  $\text{C}_5\text{H}$ ), 6.51–6.43 (m, 2H,  $\text{C}_{7/7'}\text{H}$ ), 6.28 (app-t,  $J = 7.2\text{ Hz}$ , 1H,  $\text{C}_5\text{H}$ ), 5.71–5.63 (m, 1H,  $\text{C}_4\text{H}$ ), 5.30 (br-s, 1H,  $\text{C}_{8a}\text{H}$ ), 4.93 (br-s, 1H,  $\text{N}_1\text{H}$ ), 4.55 (br-s, 1H,  $\text{N}_8\text{H}$ ), 4.29 (br-s, 1H,  $\text{C}_{8a}\text{H}$ ), 3.77 (br-s, 1H,  $\text{N}_8\text{H}$ ), 3.16–3.02 (m, 2H,  $\text{C}_2\text{H}_b$ ,  $\text{C}_2'\text{H}_a$ ), 2.87–2.69 (m, 2H,  $\text{C}_2\text{H}_a$ ,  $\text{C}_2\text{H}_b$ ), 2.60–2.45 (m, 2H,  $\text{C}_3\text{H}_a$ ,  $\text{C}_3\text{H}_b$ ), 2.43 (s, 3H,  $\text{N}_1\text{CH}_3$ ), 2.10–2.03 (m, 2H,  $\text{C}_3\text{H}_a$ ,  $\text{C}_3\text{H}_b$ ).

$^{13}\text{C}$  NMR (125.8 MHz,  $\text{CDCl}_3$ ,  $-40\text{ }^\circ\text{C}$ ): *Major Rotamer:*  $\delta$  151.97 ( $\text{C}_{7a}'$ ), 150.87 ( $\text{C}_{7a}$ ), 132.95 ( $\text{C}_{4a}'$ ), 130.91 ( $\text{C}_{4a}$ ), 128.44 ( $\text{C}_6$ ), 128.11 ( $\text{C}_6'$ ), 124.80 ( $\text{C}_4$ ), 124.18 ( $\text{C}_4'$ ), 118.52 ( $\text{C}_5'$ ), 117.94 ( $\text{C}_5$ ), 109.21 ( $\text{C}_7$ ), 108.08 ( $\text{C}_7$ ), 83.01 ( $\text{C}_{8a}$ ),

<sup>25</sup>  $^1\text{H}$  and  $^{13}\text{C}$  NMR were obtained in  $\text{CDCl}_3$  at  $-40\text{ }^\circ\text{C}$  for comparison to the data provided in the isolation report, see V. Jannic, F. Guéritte, O. Laprévotte, L. Serani, M.-T. Martin, T. Sévenet, and P. Potier, *J. Nat. Prod.* 1999, **62**, 838. However, we found  $^1\text{H}$  and  $^{13}\text{C}$  NMR data collected at  $-40\text{ }^\circ\text{C}$  difficult to analyze and less informative than data collected at  $50\text{ }^\circ\text{C}$ ; see footnote 23.

79.74 (C<sub>8a'</sub>), 64.40 (C<sub>3a</sub>), 63.05 (C<sub>3a'</sub>), 52.09 (C<sub>2</sub>),  
45.62 (C<sub>2'</sub>), 39.13 (C<sub>3</sub>), 36.14 (C<sub>3'</sub>), 35.56 (N<sub>1</sub>CH<sub>3</sub>).

*Minor Rotamer:*  $\delta$  151.20 (C<sub>7a'</sub>), 151.07 (C<sub>7a</sub>),  
132.05 (C<sub>4a/4a'</sub>), 131.87 (C<sub>4a/4a'</sub>), 128.63 (C<sub>6'</sub>),  
127.98 (C<sub>6</sub>), 124.49 (C<sub>4</sub>), 124.36 (C<sub>4'</sub>), 118.89 (C<sub>5</sub>),  
117.77 (C<sub>5'</sub>), 109.21 (C<sub>7</sub>), 108.08 (C<sub>7'</sub>), 82.53 (C<sub>8a</sub>),  
79.88 (C<sub>8a'</sub>), 63.88 (C<sub>3a'</sub>), 63.62 (C<sub>3a</sub>), 51.89 (C<sub>2</sub>),  
45.14 (C<sub>2'</sub>), 38.12 (C<sub>3'</sub>), 37.03 (C<sub>3</sub>), 35.48 (N<sub>1</sub>CH<sub>3</sub>).

FTIR (thin film) cm<sup>-1</sup>: 3377 (br-m), 2931 (w), 1604 (m), 1485 (m), 1247 (w).

HRMS (ESI) (*m/z*): calc'd for C<sub>21</sub>H<sub>25</sub>N<sub>4</sub> [M+H]<sup>+</sup>: 333.2074,  
found: 333.2075.

[ $\alpha$ ]<sub>D</sub><sup>24</sup>: -1.8 (*c* = 0.21, EtOH).<sup>26</sup>  
-13.7 (*c* = 0.20, CH<sub>2</sub>Cl<sub>2</sub>).

TLC (10% methanol in chloroform saturated with ammonium hydroxide), R<sub>f</sub>: 0.26 (UV, CAM).

---

<sup>26</sup> Literature value: [ $\alpha$ ]<sub>D</sub><sup>24</sup> = +0.5 (*c* 1, EtOH), see V. Jannic, F. Guéritte, O. Laprévotte, L. Serani, M.-T. Martin, T. Sévenet, and P. Potier, *J. Nat. Prod.* 1999, **62**, 838.

**Table S11. Comparison of our <sup>1</sup>H NMR data for (–)-desmethyl-*meso*-chimonanthine (3) with literature data (CDCl<sub>3</sub>):**

| Assignment         | Guéritte's Report <sup>26</sup><br>(+)-desmethyl- <i>meso</i> -chimonanthine<br><sup>1</sup> H NMR, 400 MHz<br>CDCl <sub>3</sub> , –40 °C<br>* denotes minor conformer | This Work<br>(–)-desmethyl- <i>meso</i> -chimonanthine<br><sup>1</sup> H NMR, 500 MHz<br>CDCl <sub>3</sub> , –40 °C<br>* denotes minor conformer | Dalko's Report <sup>27</sup><br>(±)-desmethyl- <i>meso</i> -chimonanthine<br><sup>1</sup> H NMR, 300 MHz<br>CDCl <sub>3</sub> | This Work<br>(–)-desmethyl- <i>meso</i> -chimonanthine<br><sup>1</sup> H NMR, 500 MHz<br>CDCl <sub>3</sub> , 50 °C |
|--------------------|------------------------------------------------------------------------------------------------------------------------------------------------------------------------|--------------------------------------------------------------------------------------------------------------------------------------------------|-------------------------------------------------------------------------------------------------------------------------------|--------------------------------------------------------------------------------------------------------------------|
| N1'-H              | 5.02 (s, 1H)<br>5.02 (s, 1H)*                                                                                                                                          | 4.93 (s, 1H)<br>4.93 (s, 1H)*                                                                                                                    | –                                                                                                                             | –                                                                                                                  |
| N1-CH <sub>3</sub> | 2.32 (s, 3H)<br>2.47 (s, 3H)*                                                                                                                                          | 2.27 (s, 3H)<br>2.43 (s, 3H)*                                                                                                                    | 2.30 (s, 3H)                                                                                                                  | 2.37 (s, 3H)                                                                                                       |
| C2'                | 3.18–2.73 (m, 2H)<br>3.18 (m, 2H)*                                                                                                                                     | 3.16–3.02 (m, 2H)<br>3.16–3.02 (m, 2H)*                                                                                                          | 3.02 (dd, <i>J</i> = 6.6, 10.5 Hz, 1H)<br>2.66–2.63 (m, 1H)                                                                   | 3.07 (dd, <i>J</i> = 6.7, 10.6 Hz, 1H)<br>2.72 (app-dt, <i>J</i> = 5.1, 11.1 Hz, 1H)                               |
| C2                 | 2.10 (m, 2H)<br>2.82–2.42 (m, 2H)*                                                                                                                                     | 2.25–2.10 (m, 2H)<br>2.87–2.69 (m, 2H)*                                                                                                          | 2.74–2.70 (m, 1H)<br>2.44–2.38 (m, 1H)                                                                                        | 2.78 (ddd, <i>J</i> = 1.9, 6.6, 8.5 Hz, 1H)<br>2.52–2.39 (m, 2H)                                                   |
| C3'                | 2.60–2.40 (m, 2H)<br>2.10 (m)*                                                                                                                                         | 2.60–2.45 (m, 2H)<br>2.60–2.45 (m, 2H)*                                                                                                          | 2.30–2.20 (m, 2H)<br>2.10 (dd, <i>J</i> = 5.1, 11.7 Hz, 1H)                                                                   | 2.31 (app-dt, <i>J</i> = 6.9, 11.8 Hz, 1H)<br>2.15 (dd, <i>J</i> = 5.1, 11.9 Hz, 1H)                               |
| C3                 | 2.10 (m)<br>2.10 (m)*                                                                                                                                                  | 2.10–2.03 (m, 2H)<br>2.10–2.03 (m, 2H)*                                                                                                          | 2.30–2.20 (m, 2H)<br>2.01 (dd, <i>J</i> = 1.8, 10.0 Hz, 1H)                                                                   | 2.52–2.39 (m, 2H)<br>2.10–2.04 (m, 1H)                                                                             |
| C3a                | –                                                                                                                                                                      | –                                                                                                                                                | –                                                                                                                             | –                                                                                                                  |
| C3a'               | –                                                                                                                                                                      | –                                                                                                                                                | –                                                                                                                             | –                                                                                                                  |
| C4'                | 7.28 (d, 1H)<br>5.62 (d, 1H)*                                                                                                                                          | 7.35–7.28 (m, 2H)<br>5.71–5.63 (m, 2H)*                                                                                                          | 6.60–6.42 (m, 3H)                                                                                                             | 6.64–6.50 (m, 4H)                                                                                                  |
| C4                 | 5.67 (d, 1H)<br>7.32 (d, 1H)*                                                                                                                                          | 5.71–5.63 (m, 2H)<br>7.35–7.28 (m, 2H)*                                                                                                          | 6.60–6.42 (m, 3H)                                                                                                             | 6.64–6.50 (m, 4H)                                                                                                  |
| C4a'               | –                                                                                                                                                                      | –                                                                                                                                                | –                                                                                                                             | –                                                                                                                  |
| C4a                | –                                                                                                                                                                      | –                                                                                                                                                | –                                                                                                                             | –                                                                                                                  |
| C5'                | 6.80 (t, 1H)<br>6.28 (t, 1H)*                                                                                                                                          | 6.80 (app-t, <i>J</i> = 7.4 Hz, 1H)<br>6.28 (app-t, <i>J</i> = 7.2 Hz, 1H)*                                                                      | –                                                                                                                             | –                                                                                                                  |
| C5                 | 6.30 (t, 1H)<br>6.82 (t, 1H)*                                                                                                                                          | 6.30 (app-t, <i>J</i> = 7.2 Hz, 1H)<br>6.80 (app-t, <i>J</i> = 7.4 Hz, 1H)*                                                                      | –                                                                                                                             | –                                                                                                                  |
| C5/5'              | –                                                                                                                                                                      | –                                                                                                                                                | 6.60–6.42 (m, 3H)<br>6.98–6.88 (m, 3H)                                                                                        | 6.64–6.50 (m, 4H)                                                                                                  |
| C6'                | 7.10 (t, 1H)<br>6.91 (t, 1H)*                                                                                                                                          | 7.09 (app-t, <i>J</i> = 7.6 Hz, 1H)<br>6.91 (app-t, <i>J</i> = 6.9 Hz, 1H)*                                                                      | 6.98–6.88 (m, 3H)                                                                                                             | 7.04–6.91 (m, 2H)                                                                                                  |
| C6                 | 6.91 (t, 1H)<br>7.10 (t, 1H)*                                                                                                                                          | 6.91 (app-t, <i>J</i> = 6.9 Hz, 1H)<br>7.09 (app-t, <i>J</i> = 7.6 Hz, 1H)*                                                                      | 6.98–6.88 (m, 3H)                                                                                                             | 7.04–6.91 (m, 2H)                                                                                                  |
| C7'                | 6.46 (d, 1H)<br>6.49 (d, 1H)*                                                                                                                                          | 6.51–6.43 (m, 1H)<br>6.51–6.43 (m, 1H)*                                                                                                          | 6.41 (d, <i>J</i> = 7.9 Hz, 1H)                                                                                               | 6.46 (app t, <i>J</i> = 7.1 Hz, 2H)                                                                                |

<sup>27</sup> C. Menozzi, P. I. Dalko, and J. Cossy, *Chem. Commun.* 2006, 4638.

|       |                               |                                         |                            |                                |
|-------|-------------------------------|-----------------------------------------|----------------------------|--------------------------------|
| C7    | 6.48 (d, 1H)<br>6.48 (d, 1H)* | 6.51–6.43 (m, 1H)<br>6.51–6.43 (m, 1H)* | 6.40 (d, $J = 7.7$ Hz, 1H) | 6.46 (app t, $J = 7.1$ Hz, 2H) |
| C7a'  | –                             | –                                       | –                          | –                              |
| C7a   | –                             | –                                       | –                          | –                              |
| N8'-H | 3.80 (s, 1H)<br>4.62 (s, 1H)* | 3.77 (s, 1H)<br>4.55 (s, 1H)*           | –                          | –                              |
| N8-H  | 4.64 (s, 1H)<br>3.80 (s, 1H)* | 4.55 (s, 1H)<br>3.77 (s, 1H)*           | –                          | –                              |
| C8a'  | 4.32 (s, 1H)<br>5.42 (s, 1H)  | 4.29 (s, 1H)<br>5.30 (s, 1H)*           | 4.97 (s, 1H)               | 5.02 (br-s, 1H)                |
| C8a   | 5.42 (s, 1H)<br>4.32 (s, 1H)* | 5.30 (s, 1H)<br>4.29 (s, 1H)*           | 4.46 (s, 1H)               | 4.57 (br-s, 1H)                |

**Table S12. Comparison of  $^{13}\text{C}$  NMR data of (–)-desmethyl-*meso*-chimonanthine (3) with literature data ( $\text{CDCl}_3$ ):**

| Assignment         | Guéritte's Report <sup>26</sup><br>(–)-desmethyl- <i>meso</i> -chimonanthine<br>$^{13}\text{C}$ NMR, 100 MHz<br>$\text{CDCl}_3$ , –40 °C<br>*denotes minor conformer | This Work<br>(–)-desmethyl- <i>meso</i> -chimonanthine<br>$^{13}\text{C}$ NMR, 125 MHz<br>$\text{CDCl}_3$ , –40 °C<br>*denotes minor conformer | Chemical Shift Difference<br>$\Delta\delta = \delta$ (this work)<br>– $\delta$ (ref 26) | Dalko's Report <sup>27</sup><br>(±)-desmethyl- <i>meso</i> -chimonanthine<br>$^{13}\text{C}$ NMR, 300 MHz<br>$\text{CDCl}_3$ | This Work<br>(–)-desmethyl- <i>meso</i> -chimonanthine<br>$^{13}\text{C}$ NMR, 125 MHz<br>$\text{CDCl}_3$ , 50 °C | Chemical Shift Difference<br>$\Delta\delta = \delta$ (this work)<br>– $\delta$ (ref 27) |
|--------------------|----------------------------------------------------------------------------------------------------------------------------------------------------------------------|------------------------------------------------------------------------------------------------------------------------------------------------|-----------------------------------------------------------------------------------------|------------------------------------------------------------------------------------------------------------------------------|-------------------------------------------------------------------------------------------------------------------|-----------------------------------------------------------------------------------------|
| N1'-H              | –                                                                                                                                                                    | –                                                                                                                                              | –                                                                                       | –                                                                                                                            | –                                                                                                                 | –                                                                                       |
| N1-CH <sub>3</sub> | 35.12<br>35.12*                                                                                                                                                      | 35.56<br>35.48*                                                                                                                                | 0.44<br>0.36*                                                                           | 35.7                                                                                                                         | 35.9                                                                                                              | 0.2                                                                                     |
| C2'                | 44.87<br>44.57*                                                                                                                                                      | 45.62<br>45.14*                                                                                                                                | 0.75<br>0.57*                                                                           | 45.6                                                                                                                         | 45.8                                                                                                              | 0.2                                                                                     |
| C2                 | 51.85<br>51.66*                                                                                                                                                      | 52.09<br>51.89*                                                                                                                                | 0.24<br>0.23*                                                                           | 52.2                                                                                                                         | 52.5                                                                                                              | 0.3                                                                                     |
| C3'                | 35.73<br>37.59*                                                                                                                                                      | 36.14<br>38.12*                                                                                                                                | 0.41<br>0.53*                                                                           | 38.0                                                                                                                         | 38.7                                                                                                              | 0.7                                                                                     |
| C3                 | 38.06<br>36.37*                                                                                                                                                      | 39.13<br>37.03*                                                                                                                                | 1.07<br>0.66*                                                                           | 36.5                                                                                                                         | 37.1                                                                                                              | 0.6                                                                                     |
| C3a'               | 62.85<br>63.63*                                                                                                                                                      | 63.05<br>63.88*                                                                                                                                | 0.2<br>0.25*                                                                            | 64.4                                                                                                                         | 64.7                                                                                                              | 0.3                                                                                     |
| C3a                | 63.95<br>63.30*                                                                                                                                                      | 64.40<br>63.62*                                                                                                                                | 0.45<br>0.32*                                                                           | 63.6                                                                                                                         | 64.0                                                                                                              | 0.4                                                                                     |
| C4'                | 123.91<br>124.25*                                                                                                                                                    | 124.18<br>124.36*                                                                                                                              | 0.27<br>0.11*                                                                           | –                                                                                                                            | –                                                                                                                 | –                                                                                       |
| C4                 | 124.43<br>124.06*                                                                                                                                                    | 124.80<br>124.49*                                                                                                                              | 0.37<br>0.43*                                                                           | –                                                                                                                            | –                                                                                                                 | –                                                                                       |
| C4/4'              | –                                                                                                                                                                    | –                                                                                                                                              | –                                                                                       | 124.7, 124.3                                                                                                                 | 124.9, 124.6                                                                                                      | –0.1–0.6                                                                                |
| C4a'               | 132.22<br>131.31*                                                                                                                                                    | 132.95<br>131.87*                                                                                                                              | 0.73<br>0.56                                                                            | 131.4                                                                                                                        | 132.2                                                                                                             | 0.8                                                                                     |
| C4a                | 130.04<br>131.31*                                                                                                                                                    | 130.91<br>131.87*                                                                                                                              | 0.87<br>0.56                                                                            | 131.5                                                                                                                        | 133.4                                                                                                             | 1.9                                                                                     |
| C5'                | 118.45<br>117.73*                                                                                                                                                    | 118.52<br>117.77*                                                                                                                              | 0.07<br>0.04                                                                            | –                                                                                                                            | –                                                                                                                 | –                                                                                       |
| C5                 | 117.97<br>118.83*                                                                                                                                                    | 117.94<br>118.89*                                                                                                                              | –0.03<br>0.06                                                                           | –                                                                                                                            | –                                                                                                                 | –                                                                                       |
| C5/5'              | –                                                                                                                                                                    | –                                                                                                                                              | –                                                                                       | 118.8, 118.3                                                                                                                 | 118.7, 118.7                                                                                                      | –0.1–0.4                                                                                |
| C6'                | 128.19<br>128.65*                                                                                                                                                    | 128.11<br>128.63*                                                                                                                              | –0.08<br>–0.02                                                                          | 128.1                                                                                                                        | 128.4                                                                                                             | 0.3                                                                                     |
| C6                 | 128.43<br>127.95*                                                                                                                                                    | 128.44<br>127.98*                                                                                                                              | 0.01<br>0.03                                                                            | 128.1                                                                                                                        | 128.4                                                                                                             | 0.3                                                                                     |
| C7'                | 109.10<br>108.19*                                                                                                                                                    | 109.21<br>108.08*                                                                                                                              | 0.11<br>0.11                                                                            | –                                                                                                                            | –                                                                                                                 | –                                                                                       |
| C7                 | 108.19<br>109.10*                                                                                                                                                    | 108.08<br>109.21*                                                                                                                              | –0.11<br>–0.11                                                                          | –                                                                                                                            | –                                                                                                                 | –                                                                                       |
| C7/C7'             | –                                                                                                                                                                    | –                                                                                                                                              | –                                                                                       | 108.8, 108.4                                                                                                                 | 109.1, 108.8                                                                                                      | 0–0.7                                                                                   |
| C7a'               | 151.75<br>151.04*                                                                                                                                                    | 151.97<br>151.20*                                                                                                                              | 0.22<br>0.16                                                                            | 151.6                                                                                                                        | 152.0                                                                                                             | 0.4                                                                                     |
| C7a                | 150.30<br>151.51*                                                                                                                                                    | 150.87<br>152.01*                                                                                                                              | 0.57<br>0.5                                                                             | 151.6                                                                                                                        | 152.0                                                                                                             | 0.4                                                                                     |
| N8'-H              | –                                                                                                                                                                    | –                                                                                                                                              | –                                                                                       | –                                                                                                                            | –                                                                                                                 | –                                                                                       |
| N8-H               | –                                                                                                                                                                    | –                                                                                                                                              | –                                                                                       | –                                                                                                                            | –                                                                                                                 | –                                                                                       |
| C8a'               | 79.30<br>82.36*                                                                                                                                                      | 79.74<br>79.88*                                                                                                                                | 0.44<br>–2.48                                                                           | 80.1                                                                                                                         | 80.4                                                                                                              | 0.3                                                                                     |
| C8a                | 82.36<br>82.36*                                                                                                                                                      | 83.01<br>82.53*                                                                                                                                | 0.65<br>0.17                                                                            | 83.4                                                                                                                         | 83.9                                                                                                              | 0.5                                                                                     |



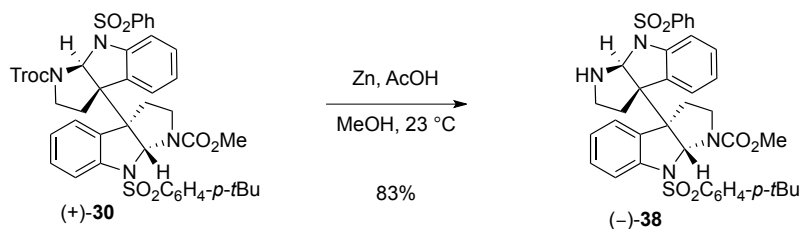

### **N1'-H Heterodimer (-)-38:**

Activated zinc dust (106 mg, 1.62 mmol, 20.0 equiv) and acetic acid (185  $\mu\text{L}$ , 3.24 mmol, 40 equiv) were added sequentially to a solution of heterodimer (+)-**30** (72 mg, 81.1  $\mu\text{mol}$ , 1 equiv) in methanol (7.0 mL) at 23  $^\circ\text{C}$ . After 1.5 h, an aqueous solution of sodium hydroxide (1 N, 10 mL) was added and the resulting suspension was extracted with dichloromethane (3  $\times$  20 mL). The combined organic extracts were washed with brine (10 mL), were dried over anhydrous sodium sulfate, were filtered, and were concentrated under reduced pressure. The resulting residue was purified by flash column chromatography on silica gel (eluent: 30 $\rightarrow$ 50% ethyl acetate in hexanes) to afford the N1'-H heterodimer (-)-**38** (48.0 mg, 83.1%) as a white foam.

As a result of the slow conformational equilibration at ambient temperature, NMR spectra were collected at elevated temperature. Structural assignments were made using additional information from gCOSY, HSQC, and HMBC experiments also collected at elevated temperature.

$^1\text{H}$  NMR (500 MHz,  $\text{DMSO-}d_6$ , 80 $^\circ\text{C}$ ):  $\delta$  7.89 (d,  $J = 7.1$  Hz, 2H,  $\text{N}_8\text{SO}_2\text{Ar-}o\text{-H}$ ), 7.68 (d,  $J = 8.3$  Hz, 2H,  $\text{N}_8\text{SO}_2\text{Ar-}m\text{-H}$ ), 7.51 (t,  $J = 7.2$  Hz, 1H,  $\text{N}_8\text{SO}_2\text{Ph-}p\text{-H}$ ), 7.35–7.10 (m, 9H,  $\text{N}_8\text{SO}_2\text{Ph-}m\text{-H}$ ,  $\text{N}_8\text{SO}_2\text{Ph-}o\text{-H}$ ,  $\text{C}_7\text{H}$ ,  $\text{C}_7'\text{H}$ ,  $\text{C}_6'\text{H}$ ,  $\text{C}_4\text{H}$ ), 7.02 (app-t,  $J = 6.9$  Hz, 1H,  $\text{C}_6\text{H}$ ), 6.95 (br-s, 1H,  $\text{C}_5\text{H}$ ), 6.54 (br-s, 1H,  $\text{C}_{8a}\text{H}$ ), 6.37 (br-s, 1H,  $\text{C}_5\text{H}$ ), 6.01 (br-s, 1H,  $\text{C}_4\text{H}$ ), 4.85 (br-s, 1H,  $\text{C}_{8a}\text{H}$ ), 3.92 (dd,  $J = 7.5, 11.4$  Hz, 1H,  $\text{C}_2\text{H}_a$ ), 3.66 (s, 3H,  $\text{N}_1\text{CO}_2\text{CH}_3$ ), 3.16 (s, 1H,  $\text{N}_1\text{H}$ ), 3.11–3.03 (m, 1H,  $\text{C}_2\text{H}_a$ ), 2.70 (app-dt,  $J = 5.0, 11.8$  Hz, 1H,  $\text{C}_2\text{H}_b$ ), 2.61 (br-s, 1H,  $\text{C}_2\text{H}_b$ ), 2.43–2.31 (m, 1H,  $\text{C}_3\text{H}_a$ ), 2.11–1.85 (m, 3H,  $\text{C}_3\text{H}_b$ ,  $\text{C}_3'\text{H}_a$ ,  $\text{C}_3'\text{H}_b$ ), 1.29 (s, 9H,  $\text{C}(\text{CH}_3)_3$ ).

$^{13}\text{C}$  NMR (125.8 MHz,  $\text{DMSO-}d_6$ , 80  $^\circ\text{C}$ ):  $\delta$  156.4 ( $\text{N}_8\text{SO}_2\text{Ar-}p\text{-C}$ ), 153.2 ( $\text{N}_1\text{CO}_2\text{CH}_3$ ), 141.7 ( $\text{N}_8\text{SO}_2\text{Ph-}ipso\text{-C}$ ), 141.1 ( $\text{C}_{7a}$ ), 138.0 ( $\text{C}_{7a}'$ ), 136.1 ( $\text{N}_8\text{SO}_2\text{Ar-}ipso\text{-C}$ ), 132.4 ( $\text{N}_8\text{SO}_2\text{Ph-}p\text{-C}$ ), 131.7 ( $\text{C}_{4a}'$ ), 130.6 ( $\text{C}_{4a}$ ), 128.9 ( $\text{C}_6$ ), 128.7 ( $\text{N}_8\text{SO}_2\text{Ph-}m\text{-C}$ ), 128.5 ( $\text{C}_6'$ ), 126.2 ( $\text{N}_8\text{SO}_2\text{Ar-}o\text{-C}$ ), 126.0 ( $\text{N}_8\text{SO}_2\text{Ar-}m\text{-C}$ ), 125.8 ( $\text{N}_8\text{SO}_2\text{Ph-}o\text{-C}$ ), 124.5 ( $\text{C}_4'$ ), 123.8 ( $\text{C}_4$ ), 122.8 ( $\text{C}_5$ ), 122.5 ( $\text{C}_5'$ ), 112.2 ( $\text{C}_7$ ), 111.2 ( $\text{C}_7'$ ), 84.2 ( $\text{C}_{8a}'$ ), 80.0 ( $\text{C}_{8a}$ ), 62.0 ( $\text{C}_{3a}$ ), 60.8 ( $\text{C}_{3a}'$ ), 52.0 ( $\text{N}_1\text{CO}_2\text{CH}_3$ ), 44.2 ( $\text{C}_2$ ), 43.2 ( $\text{C}_2'$ ),

37.2 (C<sub>3'</sub>), 37.0 (C<sub>3</sub>), 34.5 (C(CH<sub>3</sub>)<sub>3</sub>), 30.2 (C(CH<sub>3</sub>)<sub>3</sub>).

FTIR (thin film) cm<sup>-1</sup>: 2956 (m), 1713 (s), 1595 (m), 1477 (m), 1447 (m).

HRMS (ESI) (*m/z*): calc'd for C<sub>38</sub>H<sub>41</sub>N<sub>4</sub>O<sub>6</sub>S<sub>2</sub> [M+H]<sup>+</sup>: 713.2462,  
found: 713.2470.

[α]<sub>D</sub><sup>24</sup>: -13 (*c* = 0.65 CH<sub>2</sub>Cl<sub>2</sub>).

TLC (33% ethyl acetate in hexanes), R<sub>f</sub>: 0.13 (UV, CAM).

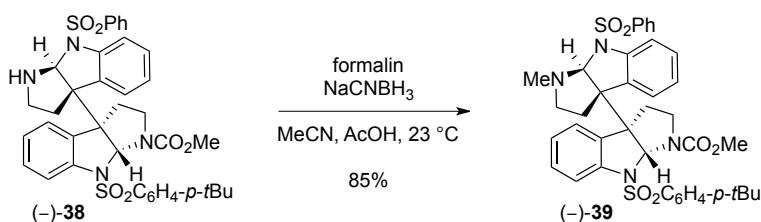

### **N1'-Methyl Heterodimer (–)-39:**

Formalin (37% wt, 1.28 mL, 16.8 mmol, 235 equiv) and sodium cyanoborohydride in tetrahydrofuran (1.0 M, 219  $\mu$ L, 219  $\mu$ mol, 3.00 equiv) were added sequentially via syringe to a solution of N1'-H heterodimer (–)-38 (52.0 mg, 74.4  $\mu$ mol, 1 equiv) in acetonitrile–acetic acid (10:1, 7.70 mL) at 23 °C. After 30 min, another portion of sodium cyanoborohydride (1.0 M in tetrahydrofuran, 146  $\mu$ L, 146  $\mu$ mol, 2.00 equiv) was added via syringe. After an additional 30 min, saturated aqueous sodium bicarbonate solution (10 mL) was added and the resulting mixture was extracted with dichloromethane (3  $\times$  20 mL). The combined organic extracts were washed with brine (15 mL), were dried over anhydrous sodium sulfate, were filtered and were concentrated under reduced pressure. The resulting residue was purified by flash column chromatography on silica gel (eluent: 25 $\rightarrow$ 50% ethyl acetate in hexanes) to afford the N1'-methyl heterodimer (–)-39 (45.0 mg, 84.9%) as a white foam.

As a result of the slow conformational equilibration at ambient temperature, NMR spectra were collected at elevated temperature. Structural assignments were made using additional information from gCOSY, HSQC, and HMBC experiments also collected at elevated temperature.

$^1\text{H}$  NMR (500 MHz,  $\text{CD}_3\text{CN}$ , 70 °C):  $\delta$  7.88 (d,  $J$  = 8.7 Hz, 2H,  $\text{N}_8\text{SO}_2\text{Ar-}o\text{-H}$ ), 7.64 (d,  $J$  = 8.3 Hz, 2H,  $\text{N}_8\text{SO}_2\text{Ar-}m\text{-H}$ ), 7.56–7.47 (m, 3H,  $\text{N}_8\text{SO}_2\text{Ph-}p\text{-H}$ ,  $\text{N}_8\text{SO}_2\text{Ph-}o\text{-H}$ ), 7.45 (d,  $J$  = 8.0 Hz, 1H,  $\text{C}_7\text{H}$ ), 7.38–7.32 (m, 2H,  $\text{N}_8\text{SO}_2\text{Ph-}m\text{-H}$ ), 7.29–7.15 (m, 4H,  $\text{C}_6\text{H}$ ,  $\text{C}_6'\text{H}$ ,  $\text{C}_4\text{H}$ ,  $\text{C}_7'\text{H}$ ), 7.02 (app-t,  $J$  = 7.4 Hz, 1H,  $\text{C}_5\text{H}$ ), 6.59 (br-s, 1H,  $\text{C}_5\text{H}$ ), 6.52 (s, 1H,  $\text{C}_{8a}\text{H}$ ), 6.33 (br-s, 1H,  $\text{C}_4\text{H}$ ), 5.20 (s, 1H,  $\text{C}_{8a}'\text{H}$ ), 3.81 (dd,  $J$  = 7.7, 11.2 Hz, 1H,  $\text{C}_2\text{H}_a$ ), 3.59 (s, 3H,  $\text{N}_1\text{CO}_2\text{CH}_3$ ), 2.77–2.71 (m, 1H,  $\text{C}_2\text{H}_a$ ), 2.68 (app-dt,  $J$  = 5.3, 11.8 Hz, 1H,  $\text{C}_2\text{H}_b$ ), 2.56 (s, 3H,  $\text{N}_1\text{-CH}_3$ ), 2.40 (app-dt,  $J$  = 5.0, 10.2 Hz, 1H,  $\text{C}_2\text{H}_b$ ), 2.21–2.08 (m, 1H,  $\text{C}_3\text{H}_a$ ), 1.98–1.84 (m, 3H,  $\text{C}_3\text{H}_b$ ,  $\text{C}_3\text{H}_a$ ,  $\text{C}_3\text{H}_b$ ), 1.33 (s, 9H,  $\text{C}(\text{CH}_3)_3$ ).

$^{13}\text{C}$  NMR (125.8 MHz,  $\text{CD}_3\text{CN}$ , 70 °C):  $\delta$  159.1 ( $\text{N}_8\text{SO}_2\text{Ar-}p\text{-C}$ ), 156.0 ( $\text{N}_1\text{CO}_2\text{CH}_3$ ), 144.6 (2C  $\text{C}_{7a}$ ,  $\text{C}_{7a}'$ ), 141.3 ( $\text{N}_8\text{SO}_2\text{Ph-}ipso\text{-C}$ ), 139.7 ( $\text{N}_8\text{SO}_2\text{Ar-}ipso\text{-C}$ ), 135.2 ( $\text{C}_{4a}'$ ), 134.6 ( $\text{N}_8\text{SO}_2\text{Ph-}p\text{-C}$ ), 133.3 ( $\text{C}_{4a}$ ), 131.2 ( $\text{C}_6$ ), 131.0 ( $\text{N}_8\text{SO}_2\text{Ph-}m\text{-C}$ ), 130.6 ( $\text{C}_6'$ ), 129.1 ( $\text{N}_8\text{SO}_2\text{Ph-}o\text{-C}$ ), 128.3 ( $\text{N}_8\text{SO}_2\text{Ar-}o\text{-C}$ ,  $\text{N}_8\text{SO}_2\text{Ar-}m\text{-C}$ ), 126.7 (2C,  $\text{C}_4$ ,  $\text{C}_4'$ ), 125.6 ( $\text{C}_5$ ), 125.3 ( $\text{C}_5'$ ), 115.8 ( $\text{C}_7$ ), 115.5 ( $\text{C}_7'$ ), 91.2

(C<sub>8a'</sub>), 82.7 (C<sub>8a</sub>), 64.7 (C<sub>3a'</sub>), 64.3 (C<sub>3a</sub>), 54.0 (N<sub>1</sub>CO<sub>2</sub>CH<sub>3</sub>), 53.3 (C<sub>2'</sub>), 46.7 (C<sub>2</sub>), 39.3 (C<sub>3</sub>), 39.0 (C<sub>3'</sub>), 38.8 (N<sub>1</sub>CH<sub>3</sub>), 36.7 (C(CH<sub>3</sub>)<sub>3</sub>), 32.1 (C(CH<sub>3</sub>)<sub>3</sub>).

FTIR (thin film) cm<sup>-1</sup>: 2956 (m), 1713 (s), 1595 (m), 1477 (m), 1447 (m).

HRMS (ESI) (*m/z*): calc'd for C<sub>39</sub>H<sub>43</sub>N<sub>4</sub>O<sub>6</sub>S<sub>2</sub> [M+H]<sup>+</sup>: 727.2619, found: 727.2627.

[α]<sub>D</sub><sup>24</sup>: -15 (*c* = 0.96, CH<sub>2</sub>Cl<sub>2</sub>).

TLC (50% ethyl acetate in hexanes), R<sub>f</sub>: 0.55 (UV, CAM).

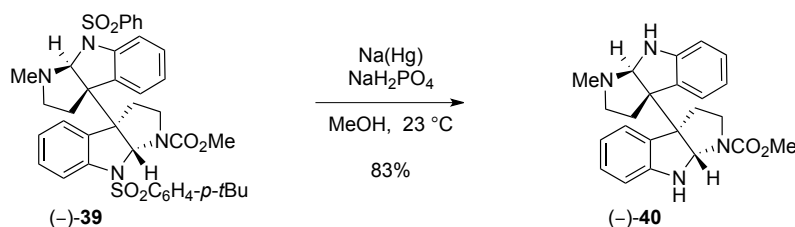

**(-)-N1-Carboxymethyl-*meso*-Chimonanthine (40):**

Sodium amalgam (5%-Na, 443 mg, 963  $\mu\text{mol}$ , 20.0 equiv)<sup>8</sup> was added to a suspension of sodium phosphate monobasic monohydrate (146 mg, 1.06 mmol, 22.0 equiv) and N1'-methyl heterodimer (-)-**39** (35.0 mg, 49.1  $\mu\text{mol}$ , 1 equiv) in methanol at 23  $^\circ\text{C}$ . After 1 h, another portion of sodium phosphate monobasic monohydrate (146 mg, 1.06 mmol, 22.0 equiv) and sodium amalgam (5%-Na, 443 mg, 963  $\mu\text{mol}$ , 20.0 equiv) were added sequentially. After an additional 1 h, sodium phosphate monobasic monohydrate (146 mg, 1.06 mmol, 22.0 equiv) and sodium amalgam (5%-Na, 443 mg, 0.963 mmol, 20.0 equiv) were added. After 1 h, the reaction mixture was diluted with ethyl acetate (20 mL) and was washed with 5% aqueous sodium bicarbonate solution (10 mL). The aqueous layer was separated and extracted with ethyl acetate (2  $\times$  20 mL). The combined organic layers were washed with brine (10 mL), were dried over anhydrous sodium sulfate, were filtered, and were concentrated under reduced pressure. The resulting residue was purified by flash column chromatography on silica gel (eluent: gradient, 5% methanol  $\rightarrow$  9% methanol, 1.0% ammonium hydroxide in chloroform) to afford the heterodimer (-)-N1-carboxymethyl-*meso*-chimonanthine (**40**, 15.5 mg, 82.6%) as a white solid.

As a result of the slow conformational equilibration at ambient temperature, NMR spectra were collected at elevated temperature. Structural assignments were made using additional information from gCOSY, HSQC, and HMBC experiments also collected at elevated temperature.

<sup>1</sup>H NMR (500 MHz, CD<sub>3</sub>CN, 75  $^\circ\text{C}$ ):  $\delta$  7.02 (app-t,  $J = 7.5$  Hz, 1H, C<sub>6</sub>H), 6.98 (app-t,  $J = 7.5$  Hz, 1H, C<sub>6</sub>H), 6.70–6.58 (m, 2H, C<sub>4</sub>H, C<sub>4</sub>H), 6.57–6.47 (m, 3H, C<sub>5</sub>H, C<sub>5</sub>H, C<sub>7</sub>H), 6.45 (d,  $J = 8.0$  Hz, 1H, C<sub>7</sub>H), 5.35 (br-s, 1H, C<sub>8a</sub>H), 5.03 (br-s, 1H, N<sub>8</sub>H), 4.56 (s, 2H, C<sub>8a</sub>H, N<sub>8</sub>H), 3.73–3.65 (m, 4H, C<sub>2</sub>H<sub>a</sub>, N<sub>1</sub>CO<sub>2</sub>CH<sub>3</sub>), 2.91 (app-dt,  $J = 6.4, 10.9$  Hz, 1H, C<sub>2</sub>H<sub>b</sub>), 2.76–2.67 (m, 1H, C<sub>2</sub>H<sub>a</sub>), 2.52 (app-dt,  $J = 8.5, 11.8$  Hz, 1H, C<sub>3</sub>H<sub>a</sub>), 2.43–2.36 (m, 2H, C<sub>2</sub>H<sub>b</sub>, C<sub>3</sub>H<sub>a</sub>), 2.34 (s, 3H, N<sub>1</sub>CH<sub>3</sub>), 2.28 (dd,  $J = 6.3, 12.3$  Hz, 1H, C<sub>3</sub>H<sub>b</sub>), 2.03–1.96 (m, 1H, C<sub>3</sub>H<sub>b</sub>).

<sup>13</sup>C NMR (125.8 MHz, CD<sub>3</sub>CN, 75  $^\circ\text{C}$ ):  $\delta$  156.7 (N<sub>1</sub>CO<sub>2</sub>CH<sub>3</sub>), 154.2 (C<sub>7a</sub>'), 152.8 (C<sub>7a</sub>), 134.2 (C<sub>4a</sub>'), 132.4 (C<sub>4a</sub>'), 130.3 (C<sub>6</sub>), 129.8 (C<sub>6</sub>'), 126.2 (2C, C<sub>4</sub>, C<sub>4</sub>'), 119.8 (C<sub>5</sub>), 119.3 (C<sub>5</sub>'), 110.4 (C<sub>7</sub>), 110.1 (C<sub>7</sub>'), 85.3 (C<sub>8a</sub>'), 79.7 (C<sub>8a</sub>), 65.1 (2C, C<sub>3a</sub>, C<sub>3a</sub>'), 53.9 (C<sub>2</sub>'), 53.5 (N<sub>1</sub>CO<sub>2</sub>CH<sub>3</sub>), 46.8 (C<sub>2</sub>), 38.6 (C<sub>3</sub>'), 36.9 (C<sub>3</sub>), 36.2 (N<sub>1</sub>CH<sub>3</sub>).

FTIR (thin film)  $\text{cm}^{-1}$ : 3372 (br-m), 2955 (m), 1696 (s), 1606 (m), 1451 (s), 1386 (s).

HRMS (ESI) ( $m/z$ ): calc'd for  $\text{C}_{23}\text{H}_{27}\text{N}_4\text{O}_2$   $[\text{M}+\text{H}]^+$ : 391.2129, found: 391.2132.

$[\alpha]_{\text{D}}^{24}$ :  $-202$  ( $c = 0.95$ ,  $\text{CH}_2\text{Cl}_2$ ).

TLC (9% methanol, 1% ammonium hydroxide in chloroform),  $R_f$ : 0.40 (UV, CAM).

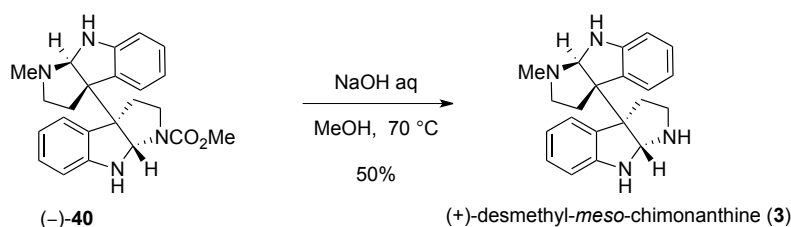

### **(+)-Desmethyl-*meso*-Chimonanthine (**3**):**

An aqueous solution of sodium hydroxide (5 N, 1.5 mL) was added to solution of (–)-N1-carboxymethyl-*meso*-chimonanthine (**40**, 18.0 mg, 46.1  $\mu\text{mol}$ , 1 equiv) in methanol (3 mL) in a sealed tube at 23 °C. The reaction vessel was sealed and heated to 70 °C. After 26 h, the brown mixture was allowed to cool to 23 °C and was extracted with dichloromethane (2  $\times$  20 mL). The combined organic extracts were washed with brine (10 mL), were dried over anhydrous sodium sulfate, were filtered, and were concentrated under reduced pressure. The resulting residue was purified by flash column chromatography on silica gel (eluent: 4.5% methanol, 0.5% ammonium hydroxide  $\rightarrow$  18% methanol, 2.0% ammonium hydroxide in chloroform) to afford the (+)-desmethyl-*meso*-chimonanthine (**3**, 7.7 mg, 50.4%) as a white solid.

The corresponding enantiomer, (–)-desmethyl-*meso*-chimonanthine (**3**, 16 mg, 91%) was obtained by Red-Al reduction of (–)-N1-carboxymethyl desmethyl-*meso*-chimonanthine (**37**). For full characterization of compound **3**, see pages S67–S72.

$[\alpha]_{\text{D}}^{24}$ : +2.7 ( $c = 0.13$ , EtOH).<sup>26</sup>  
+13.7 ( $c = 0.13$ , CH<sub>2</sub>Cl<sub>2</sub>).

```

SAMPLE          DEC. & VT
solvent  Benzene  dfrq  125.672
                        dn    C13
                        dpwr  30
                        dof   0
                        dm    nnn
                        dmm   w
                        dmf   10000
ACQUISITION    dseq
sfrq  499.746  dres  1.0
tn    H1      homo  n
at    3.001   wtfile
np    63050   proc  ft
sw    10504.2 fn    262144
fb    not used math  f
bs    4
tpwr  56
pw    8.6    werr
di    2.000  wexp
tof   1519.5 wbs
nt    16     wnt  wft
ct    16
alock n
gain  not used
FLAGS
il    n
in    n
dp    y
hs    nn
DISPLAY
sp    -11.0
wp    6003.5
vs    25
sc    0
wc    250
hzmm  24.01
is    143.89
rf1   4784.7
rfp   3578.2
th    7
ins   100.000
ai    ph
    
```

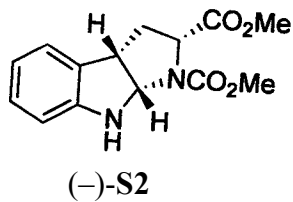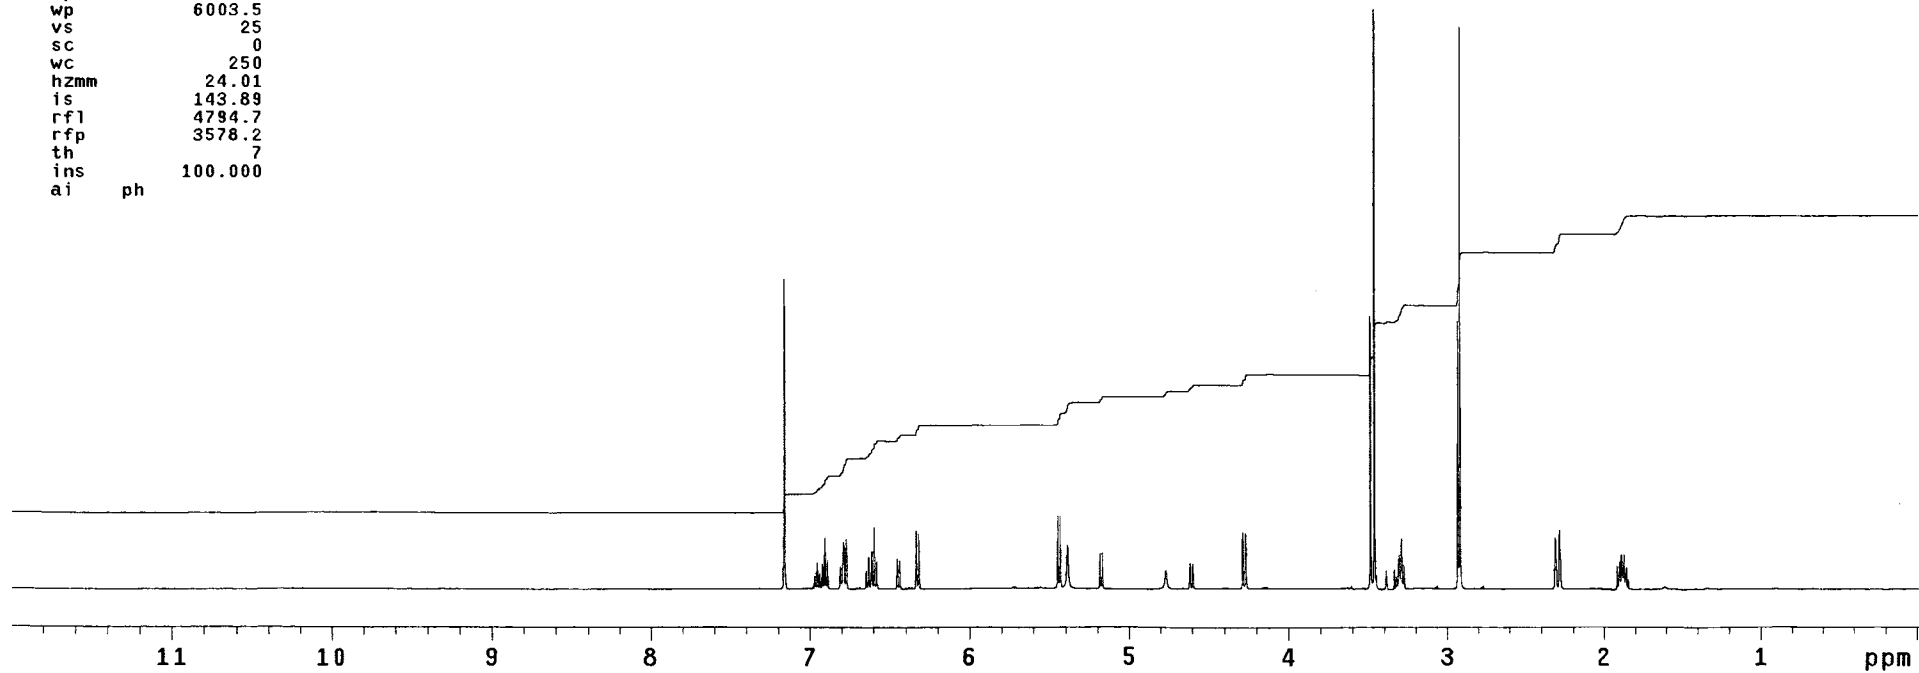



```
SAMPLE          DEC. & VT
solvent  Benzene  dfrq      499.744
          dn       H1
          dpwr     34
          dof      0
          dm       yy
          dmm      w
          dmf     10000
ACQUISITION
sfrq     125.672  dseq
tn       2.000   dres      1.0
at       2.000   homo      n
np       125588
sw       31397.2 lb
fb       not used wtfile
bs       64      proc
tpwr     58      fn       131072
pw       6.7     math      f
d1       3.000
tof      0       werr
nt       8000   wexp
ct       8000   wbs
alock    not used wnt
gain     not used
FLAGS
il       n
in       n
dp       y
hs       nn
DISPLAY
sp       -3677.1
wp       31324.4
vs       155
sc       0
wc       250
hzmm     125.30
is       500.00
rf1      19835.0
rfp      16133.5
th       68
ins      100.000
ai       ph
```

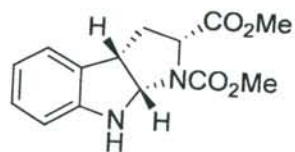

(-)-S2

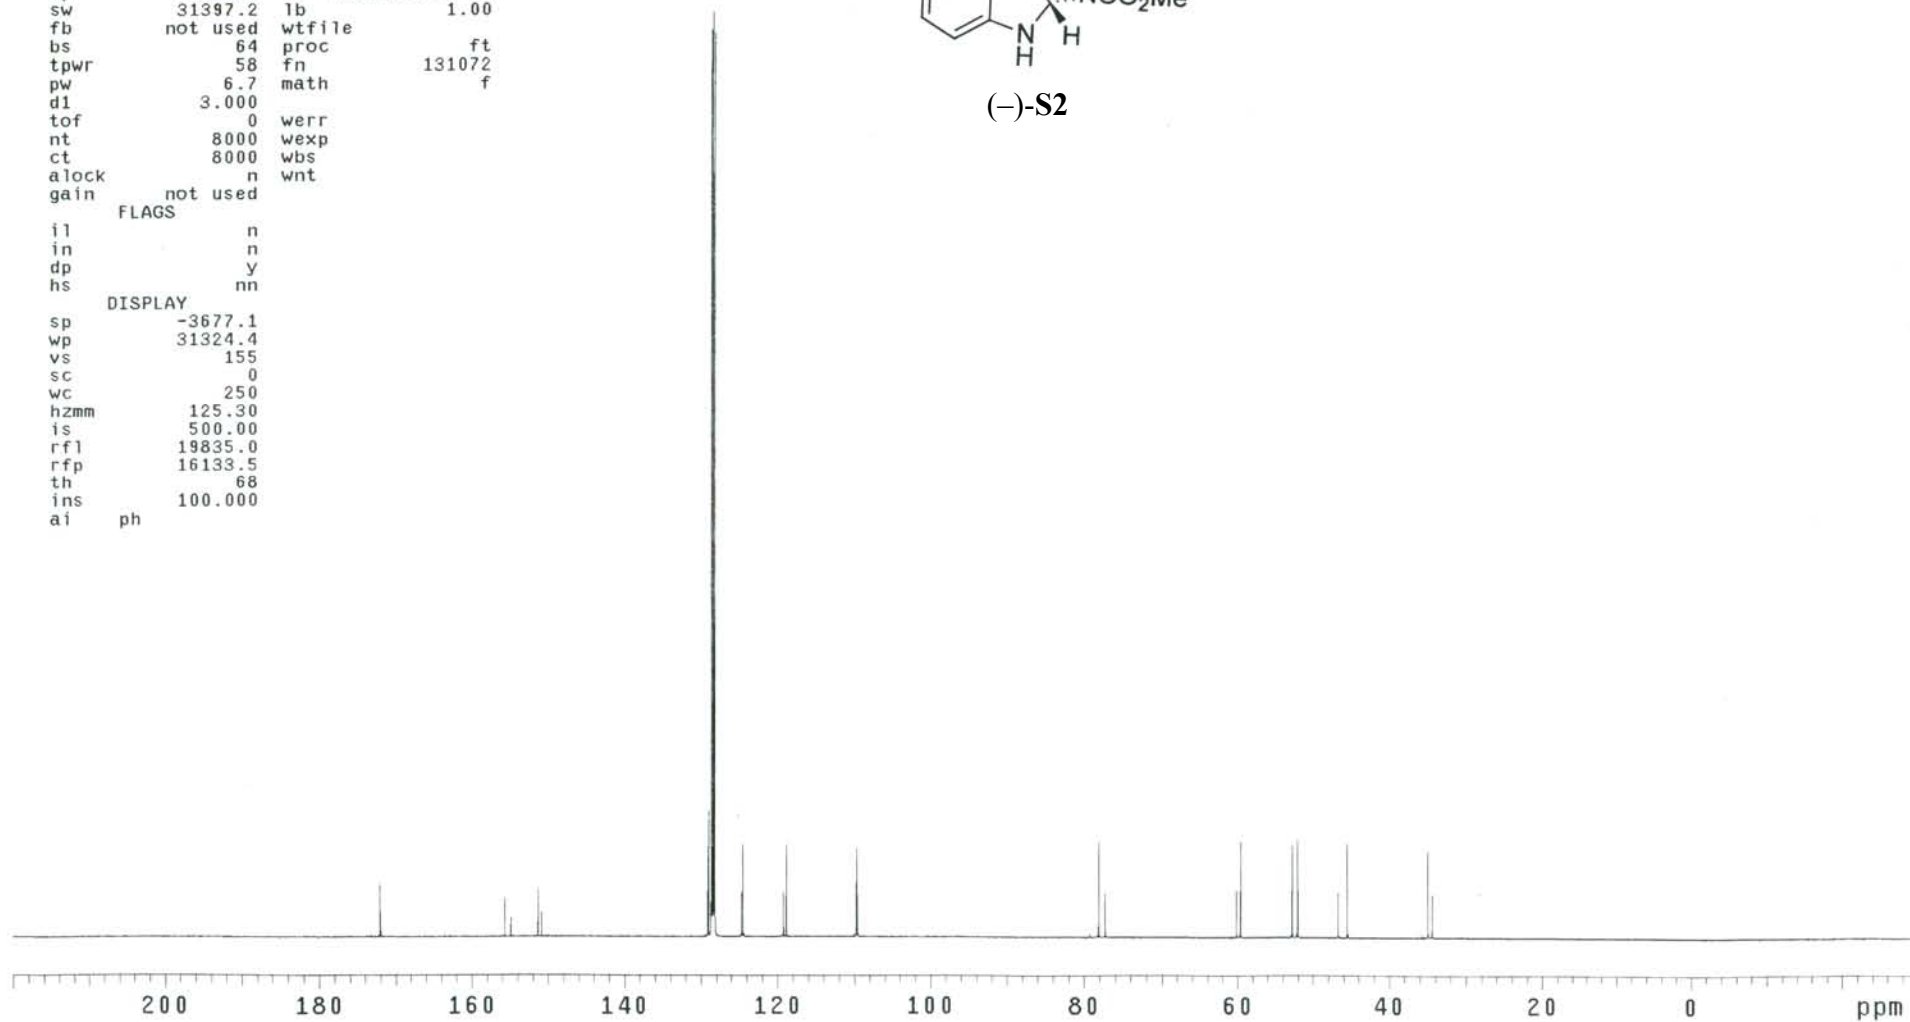

```
SAMPLE          DEC. & VT
solvent          CD3CN      dfrq      125.673
                  dn         C13
                  dpwr      30
                  dof       0
                  dm        nnn
                  dmm       w
                  dmf       10000
                  dseq
                  dres      1.0
                  homo     n
ACQUISITION
sfrq            499.748    PROCESSING
tn              H1       wtfile
at              3.001    proc      ft
np              63050    fn        262144
sw              10504.2  math     f
fb              not used
bs              4        werr
tpwr            56       wexp
pw              8.6      wbs
d1              2.000    wnt      wft
tof            1519.5
nt              16
ct              16
alock           n
gain            not used
FLAGS
il              n
in              n
dp              y
hs              nn
DISPLAY
sp              -503.6
wp              6497.4
vs              7
sc              0
wc              250
hzmm            25.99
is              201.44
rfl            2218.8
rfp            969.5
th              7
ins            100.000
ai              ph
```

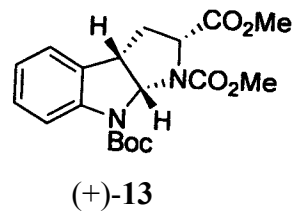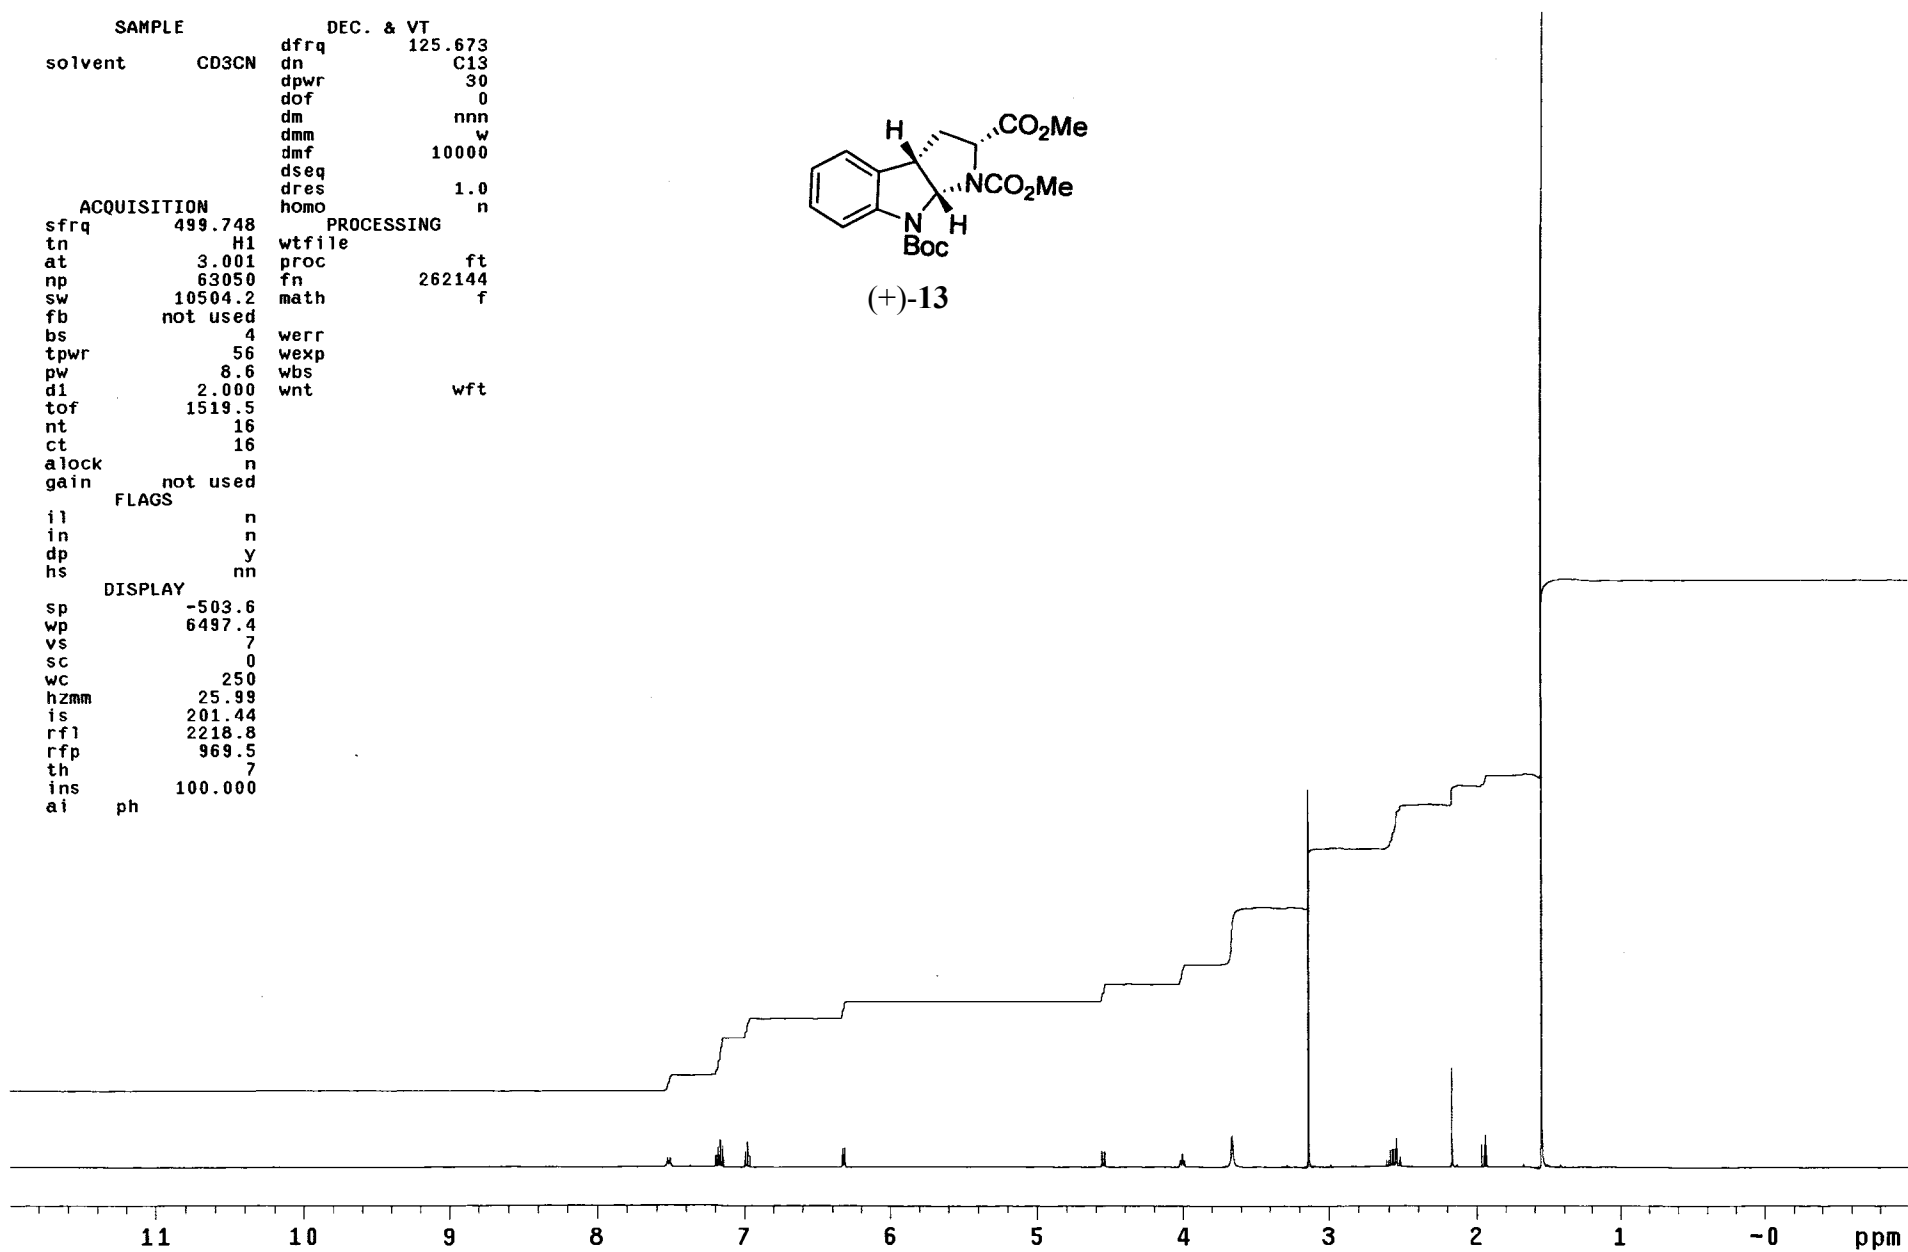

|             |          |            |         |
|-------------|----------|------------|---------|
| SAMPLE      |          | DEC. & VT  |         |
| solvent     | CD3CN    | dfrq       | 499.747 |
|             |          | dn         | H1      |
|             |          | dpwr       | 34      |
|             |          | dof        | 0       |
|             |          | dm         | yyy     |
|             |          | dmm        | w       |
|             |          | dmf        | 10400   |
|             |          | dseq       |         |
|             |          | dres       | 1.0     |
|             |          | homo       | n       |
| ACQUISITION |          | PROCESSING |         |
| sfrq        | 125.673  | lb         | 1.00    |
| tn          | C13      | wtfile     |         |
| at          | 2.000    | proc       | ft      |
| np          | 125588   | fn         | 131072  |
| sw          | 31397.2  | math       | f       |
| fb          | not used |            |         |
| bs          | 64       | werr       |         |
| tpwr        | 59       | wexp       |         |
| pw          | 6.7      | wbs        |         |
| d1          | 3.000    | wnt        |         |
| tof         | 0        |            |         |
| nt          | 5000     |            |         |
| ct          | 4864     |            |         |
| alock       | n        |            |         |
| gain        | not used |            |         |
| FLAGS       |          |            |         |
| il          | n        |            |         |
| in          | n        |            |         |
| dp          | y        |            |         |
| hs          | nn       |            |         |
| DISPLAY     |          |            |         |
| sp          | -3598.5  |            |         |
| wp          | 31247.2  |            |         |
| vs          | 505      |            |         |
| sc          | 0        |            |         |
| wc          | 250      |            |         |
| hzmm        | 124.99   |            |         |
| is          | 500.00   |            |         |
| rfl         | 18538.1  |            |         |
| rfp         | 14914.7  |            |         |
| th          | 3        |            |         |
| ins         | 100.000  |            |         |
| ai          | ph       |            |         |

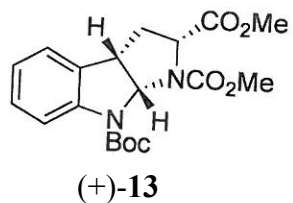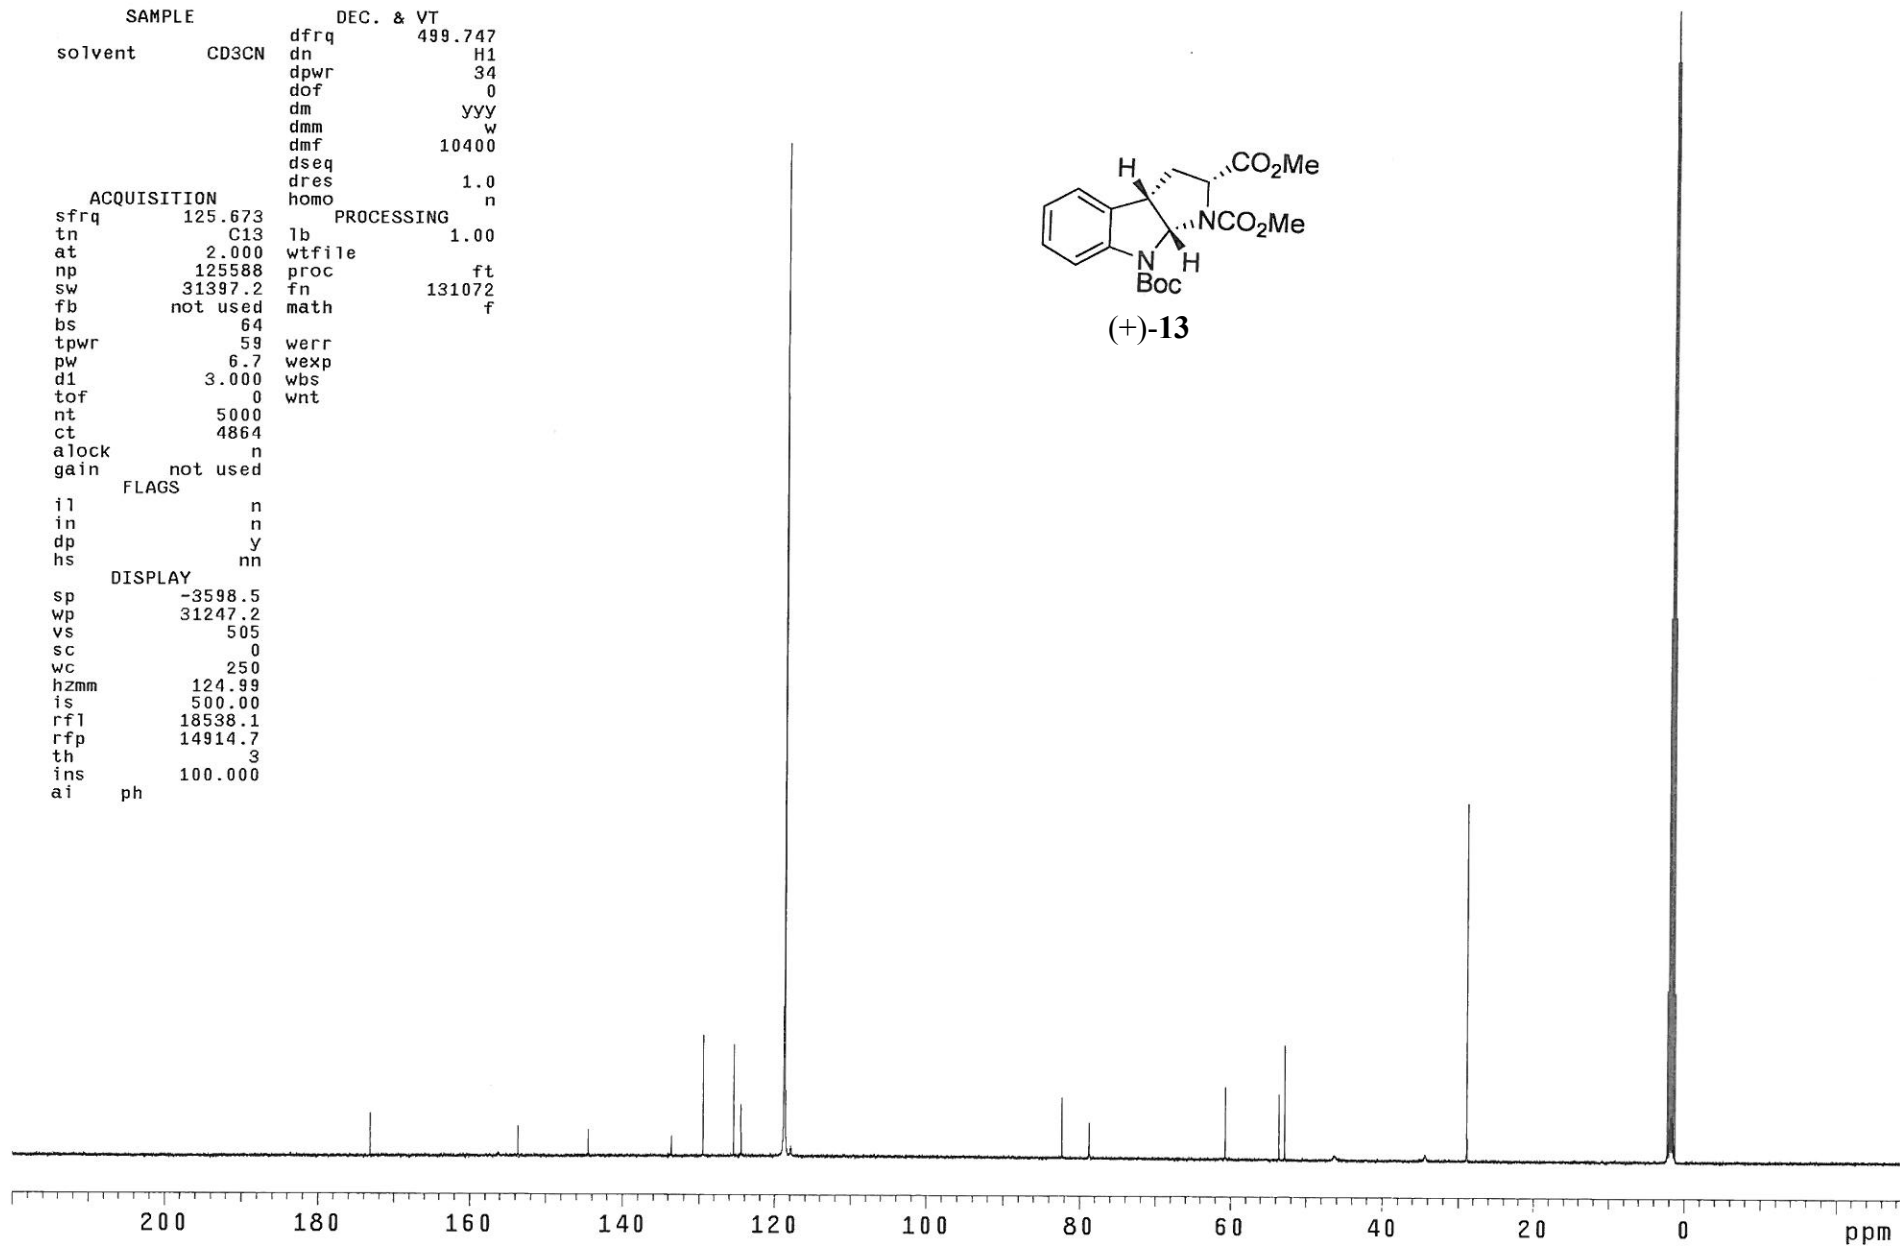

```
SAMPLE          DEC. & VT
solvent         CD3CN   dfrq      125.673
                  dn       C13
                  dpwr      30
                  dof       0
                  dm        nnn
                  dmm        w
                  dmf       10000
                  dseq
                  dres      1.0
                  homo     n
ACQUISITION     PROCESSING
sfrq           499.748  wtfile
tn             H1      proc
at             3.001   fn      262144
np             63050   math   f
sw             10504.2
fb             not used
bs             4       werr
tpwr           56     wexp
pw             8.6    wbs
d1             2.000  wnt
tof           1519.5  wft
nt             16
ct             16
alock         n
gain          not used
FLAGS
il            n
in            n
dp            y
hs            nn
DISPLAY
sp            -509.6
wp            6503.4
vs            7
sc            0
wc            250
hzmm         26.01
ls            158.18
rf1          2218.9
rfp          969.5
th            7
ins          100.000
ai           ph
```

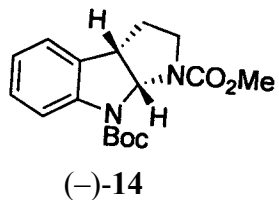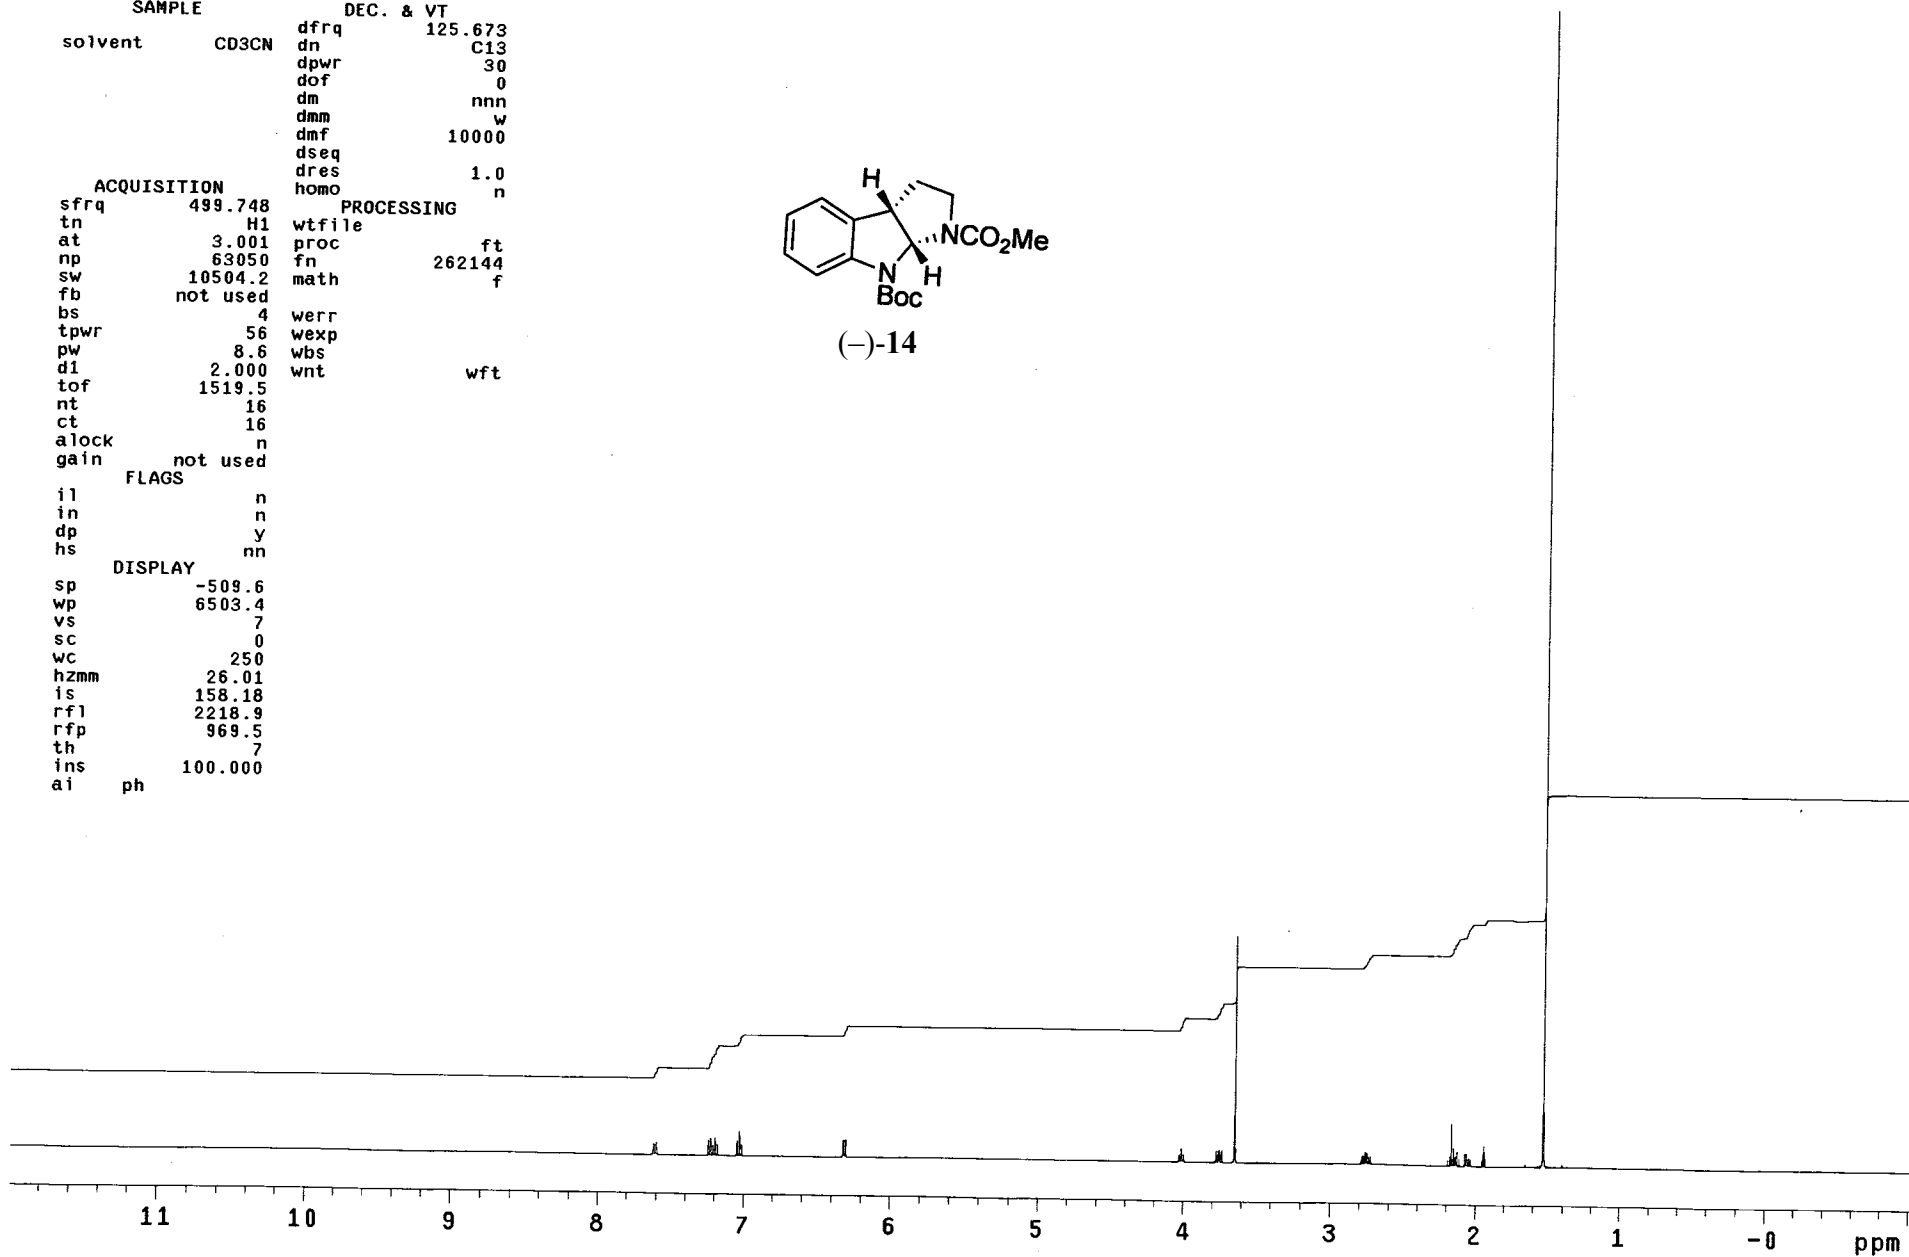

```
SAMPLE          DEC. & VT
solvent         CD3CN    dfrq      500.232
                dn        H1
                dpwr      39
                dof       -500.0
                dm        y
                dmm       w
                dmf       10000
ACQUISITION
sfrq           125.795  dseq
tn             C13      dres      1.0
at             1.736    homo      n
np             131010   PROCESSING
sw             37735.8  lb        0.30
fb             not used wtfile
bs             32       proc
ss             1        fn        131072
tpwr           58       math      f
pw             6.9
d1             0.763    werr
tof            631.4    wexp
nt             10000   wbs
ct             10000   wnt
alock          n
gain           not used
                FLAGS
il             n
in             n
dp             y
hs             nn
DISPLAY
sp             -2559.1
wp             30200.3
vs             710
sc             0
wc             250
hzmm           120.80
is             500.00
rfl            21073.8
rfp            14929.2
th             20
ins            1.000
ai            ph
```

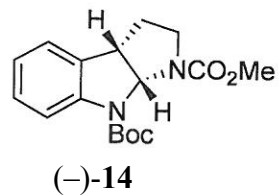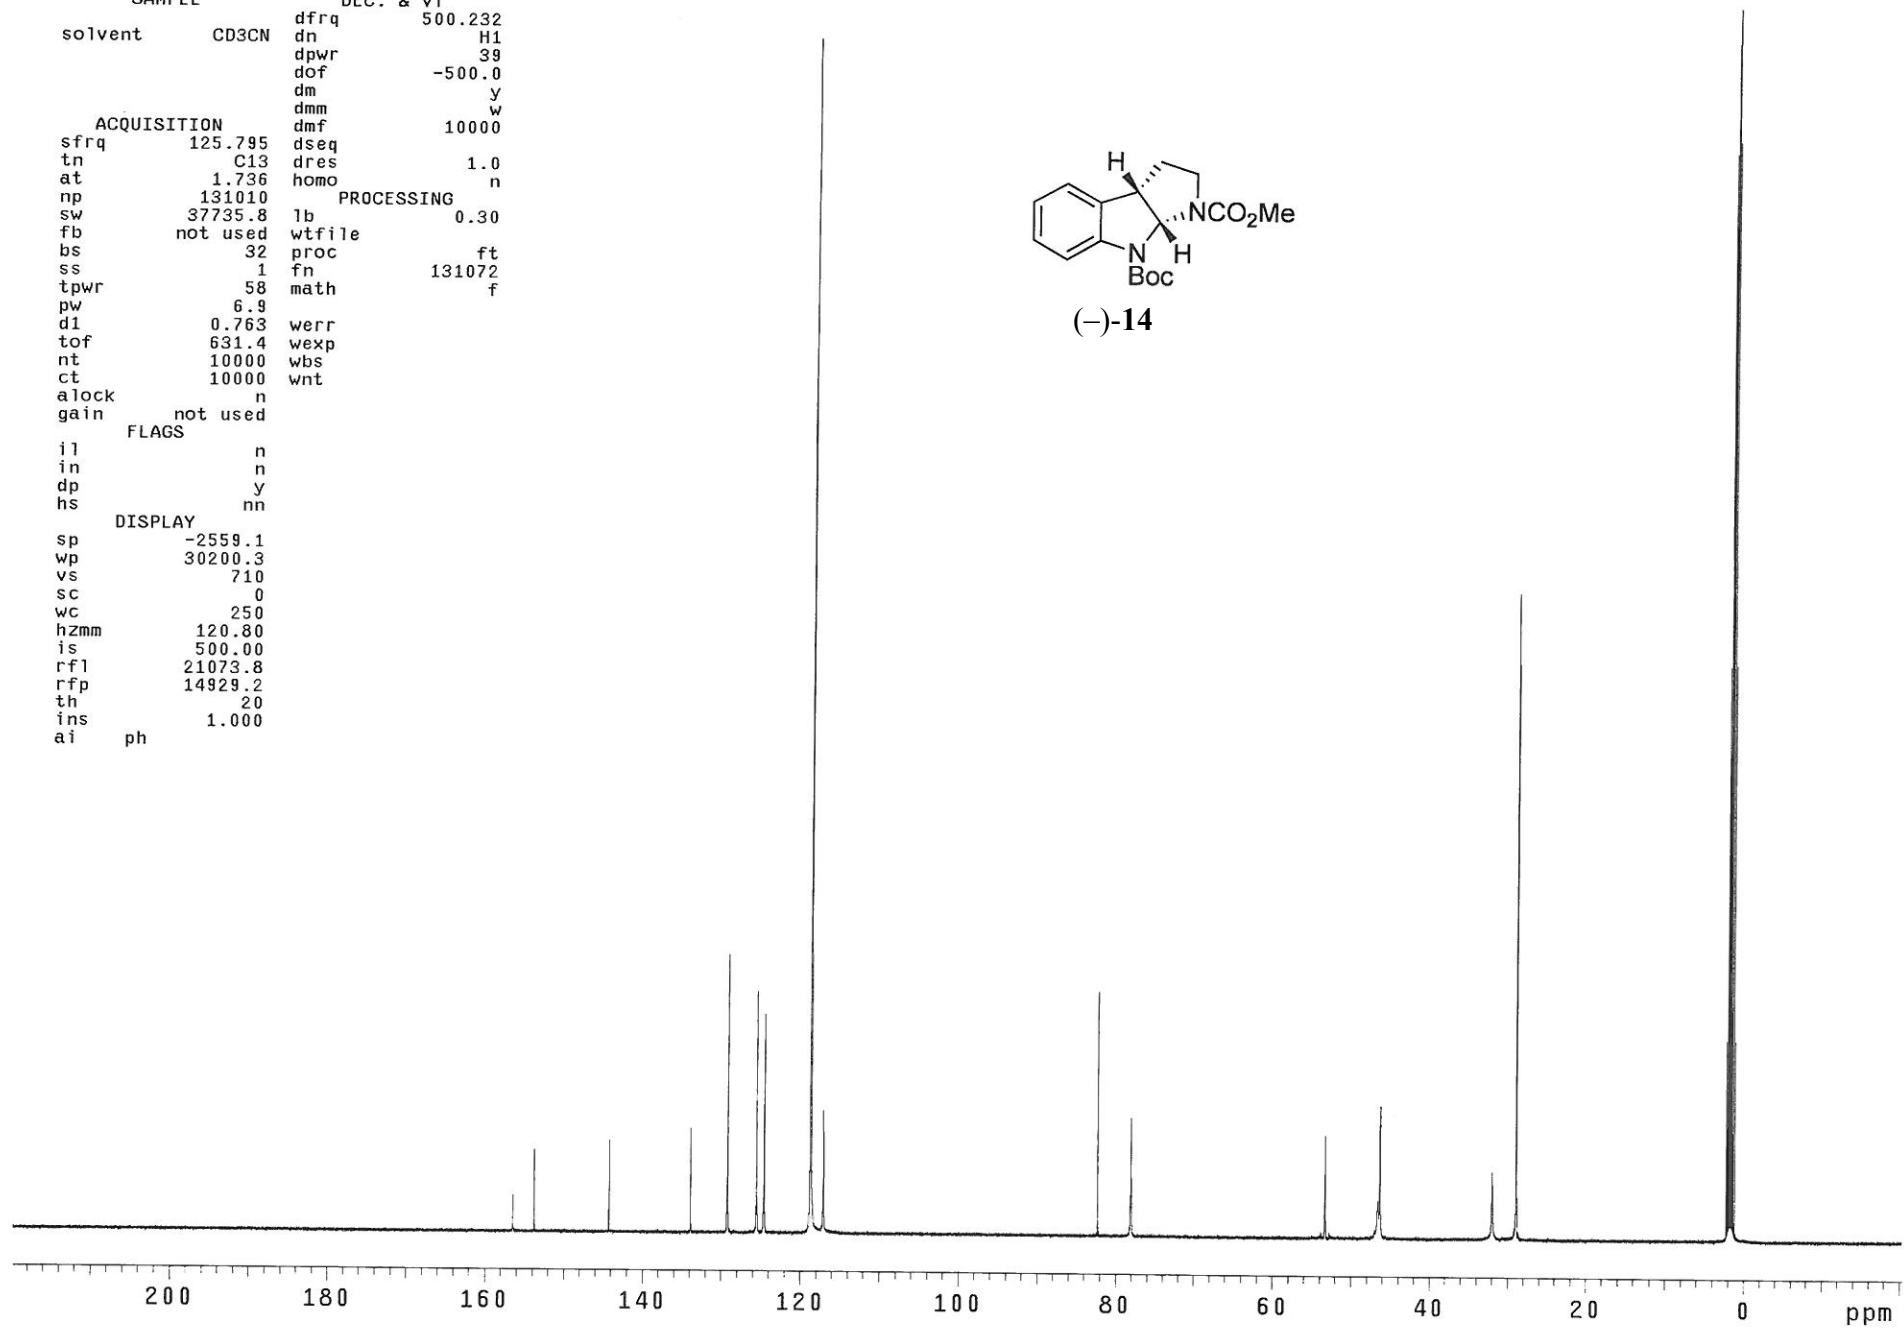

|             |          |            |         |
|-------------|----------|------------|---------|
| SAMPLE      |          | DEC. & VT  |         |
| solvent     | CD3CN    | dfrq       | 125.673 |
|             |          | dn         | C13     |
|             |          | dpwr       | 30      |
|             |          | dof        | 0       |
|             |          | dm         | nnn     |
|             |          | dmm        | w       |
|             |          | dmf        | 10000   |
|             |          | dseq       |         |
|             |          | dres       | 1.0     |
|             |          | homo       | n       |
| ACQUISITION |          | PROCESSING |         |
| sfrq        | 499.748  | wtfile     |         |
| tn          | H1       | proc       | ft      |
| at          | 3.001    | fn         | 262144  |
| np          | 63050    | math       | f       |
| sw          | 10504.2  |            |         |
| fb          | not used | werr       |         |
| bs          | 4        | wexp       |         |
| tpwr        | 56       | wbs        |         |
| pw          | 8.6      | wnt        | wft     |
| d1          | 2.000    |            |         |
| tof         | 1519.5   |            |         |
| nt          | 16       |            |         |
| ct          | 12       |            |         |
| alock       | n        |            |         |
| gain        | not used |            |         |
| FLAGS       |          |            |         |
| il          | n        |            |         |
| in          | n        |            |         |
| dp          | y        |            |         |
| hs          | nn       |            |         |
| DISPLAY     |          |            |         |
| sp          | -500.4   |            |         |
| wp          | 6494.3   |            |         |
| vs          | 10       |            |         |
| sc          | 0        |            |         |
| wc          | 250      |            |         |
| hzmm        | 25.98    |            |         |
| is          | 132.51   |            |         |
| rfl         | 2218.9   |            |         |
| rfp         | 969.5    |            |         |
| th          | 7        |            |         |
| ins         | 100.000  |            |         |
| ai          | ph       |            |         |

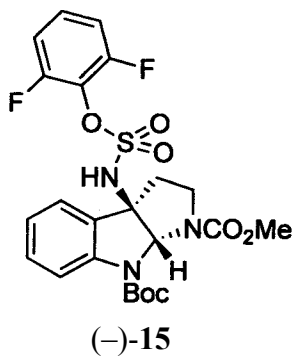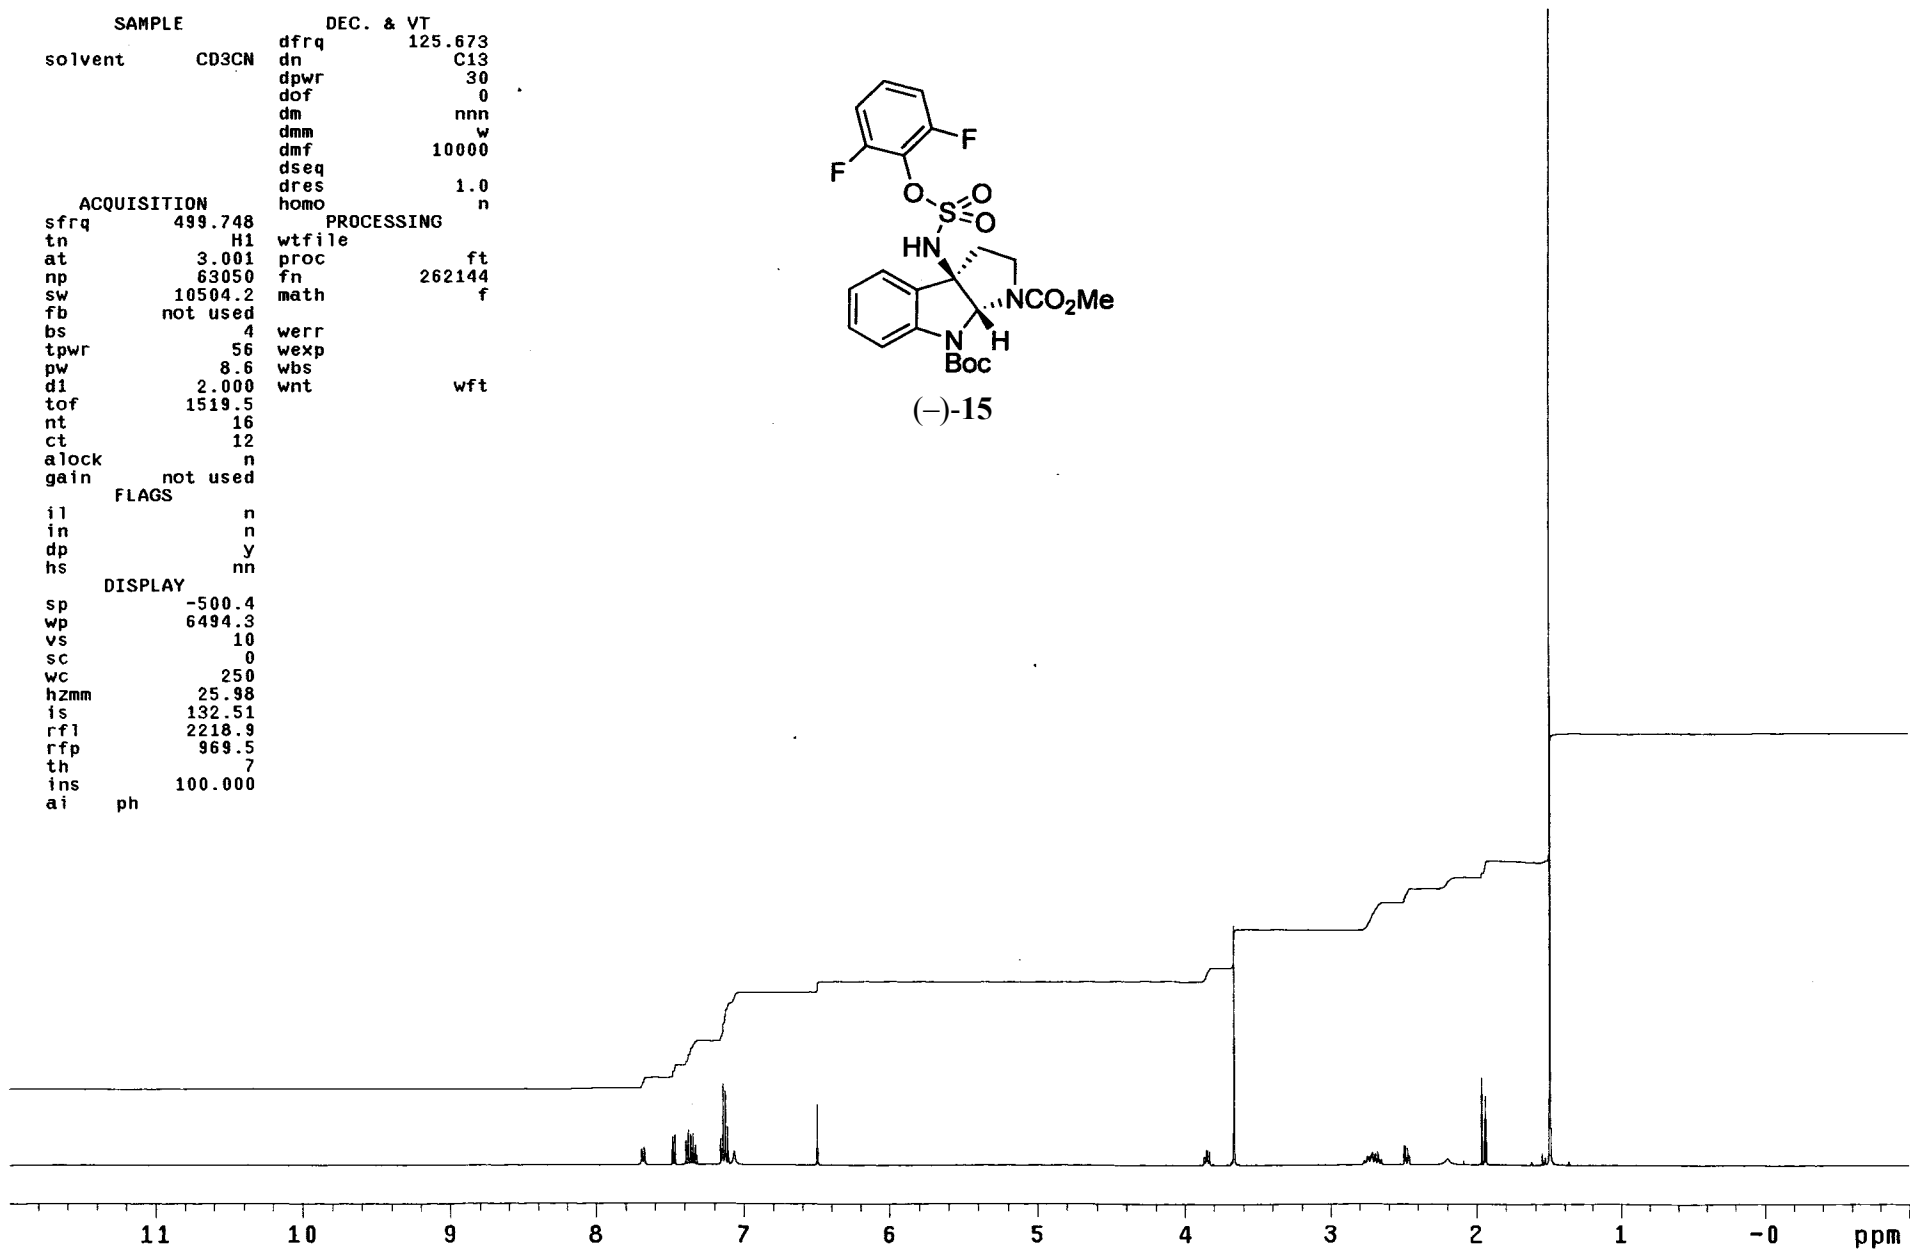

|             |          |            |         |
|-------------|----------|------------|---------|
| SAMPLE      |          | DEC. & VT  |         |
| solvent     | CD3CN    | dfrq       | 500.232 |
|             |          | dn         | H1      |
|             |          | dpwr       | 38      |
|             |          | doF        | -500.0  |
|             |          | dm         | y       |
|             |          | dmm        | w       |
|             |          | dmf        | 10700   |
|             |          | dseq       |         |
|             |          | dres       | 1.0     |
|             |          | homo       | n       |
| ACQUISITION |          | PROCESSING |         |
| sfrq        | 125.795  | lb         | 0.30    |
| tn          | C13      | wtfile     |         |
| at          | 1.736    | proc       | ft      |
| np          | 131010   | fn         | 131072  |
| sw          | 37735.8  | math       | f       |
| fb          | not used |            |         |
| bs          | 64       |            |         |
| ss          | 1        | werr       |         |
| tpwr        | 59       | wexp       |         |
| pw          | 6.9      | wbs        |         |
| d1          | 0.763    | wnt        |         |
| tof         | 631.4    |            |         |
| nt          | 30000    |            |         |
| ct          | 17216    |            |         |
| alock       | n        |            |         |
| gain        | not used |            |         |
| FLAGS       |          |            |         |
| il          | n        |            |         |
| in          | n        |            |         |
| dp          | y        |            |         |
| hs          | nn       |            |         |
| DISPLAY     |          |            |         |
| sp          | -2536.1  |            |         |
| wp          | 30253.3  |            |         |
| vs          | 161      |            |         |
| sc          | 0        |            |         |
| wc          | 250      |            |         |
| hzmm        | 121.01   |            |         |
| is          | 500.00   |            |         |
| rfl         | 21075.0  |            |         |
| rfp         | 14929.2  |            |         |
| th          | 20       |            |         |
| ins         | 1.000    |            |         |
| ai          | ph       |            |         |

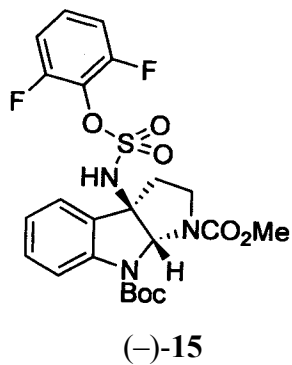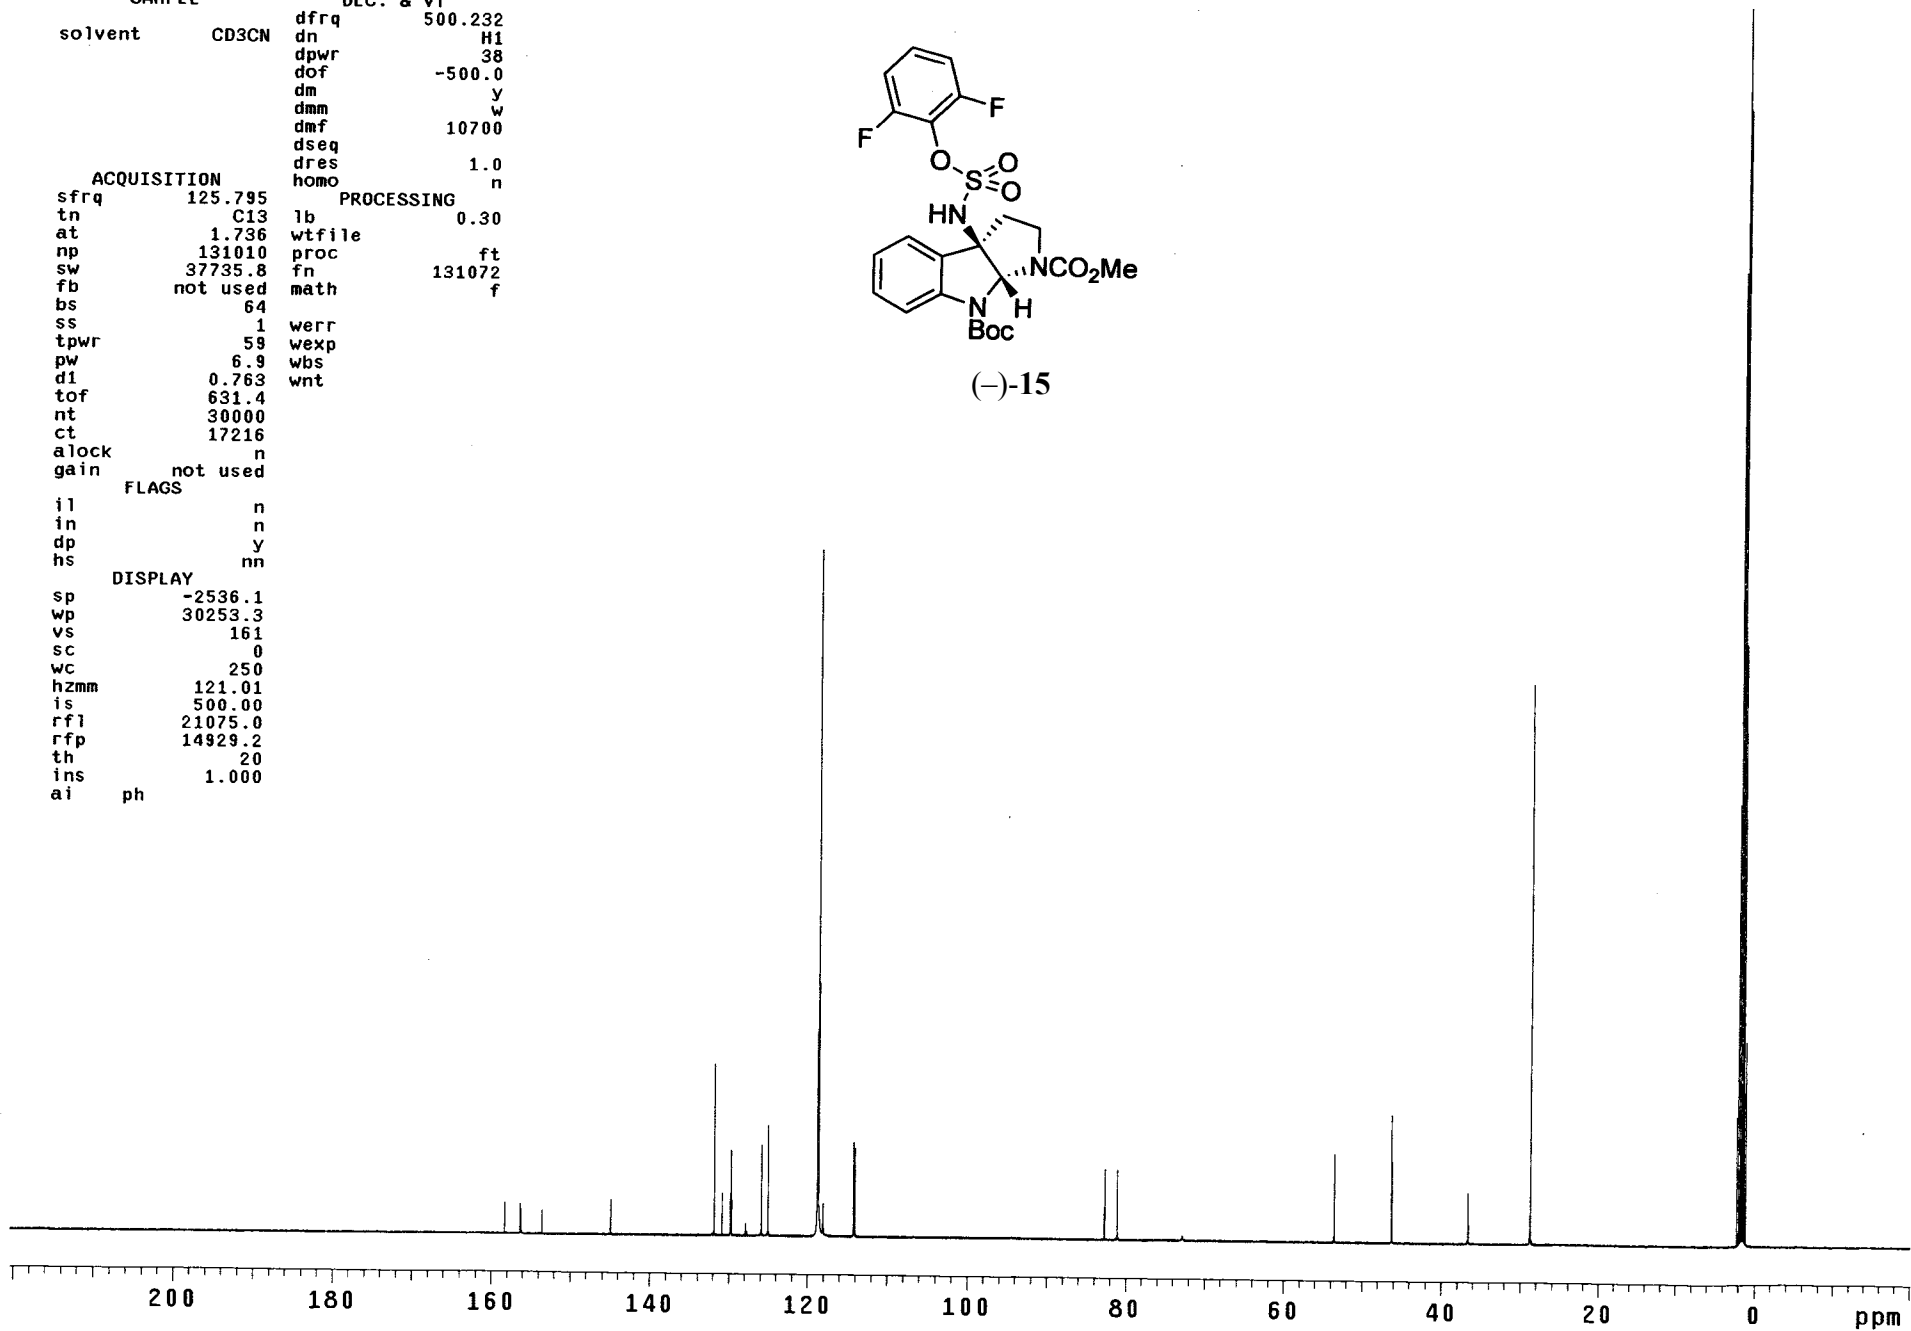

```
SAMPLE          DEC. & VT
solvent         CD3CN   dfrq      300.109
                dn       H1
                dpwr     30
                dof      0
                dm       nnn
                dmm      c
                dmf      200
ACQUISITION     PROCESSING
sfrq           282.383  1b         0.30
tn             F19
at             0.300   wtfile
np            59906   proc
sw           100000.0  fn         262144
fb            55000
bs             8      werr
tpwr          56     wexp
pw            11.0   wbs
d1            4.000  wnt
tof           29637.2
nt            64
ct            16
alock         n
gain          not used
                FLAGS
il            n
in            n
dp            Y
DISPLAY
sp           -42485.9
wp           84781.6
vs            76
sc            0
wc            250
hzmm         339.13
is            500.00
rfl          49703.3
rfp           0
th            20
ins          100.000
nm           ph
```

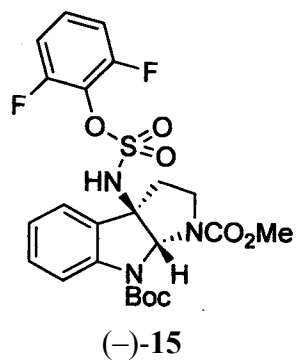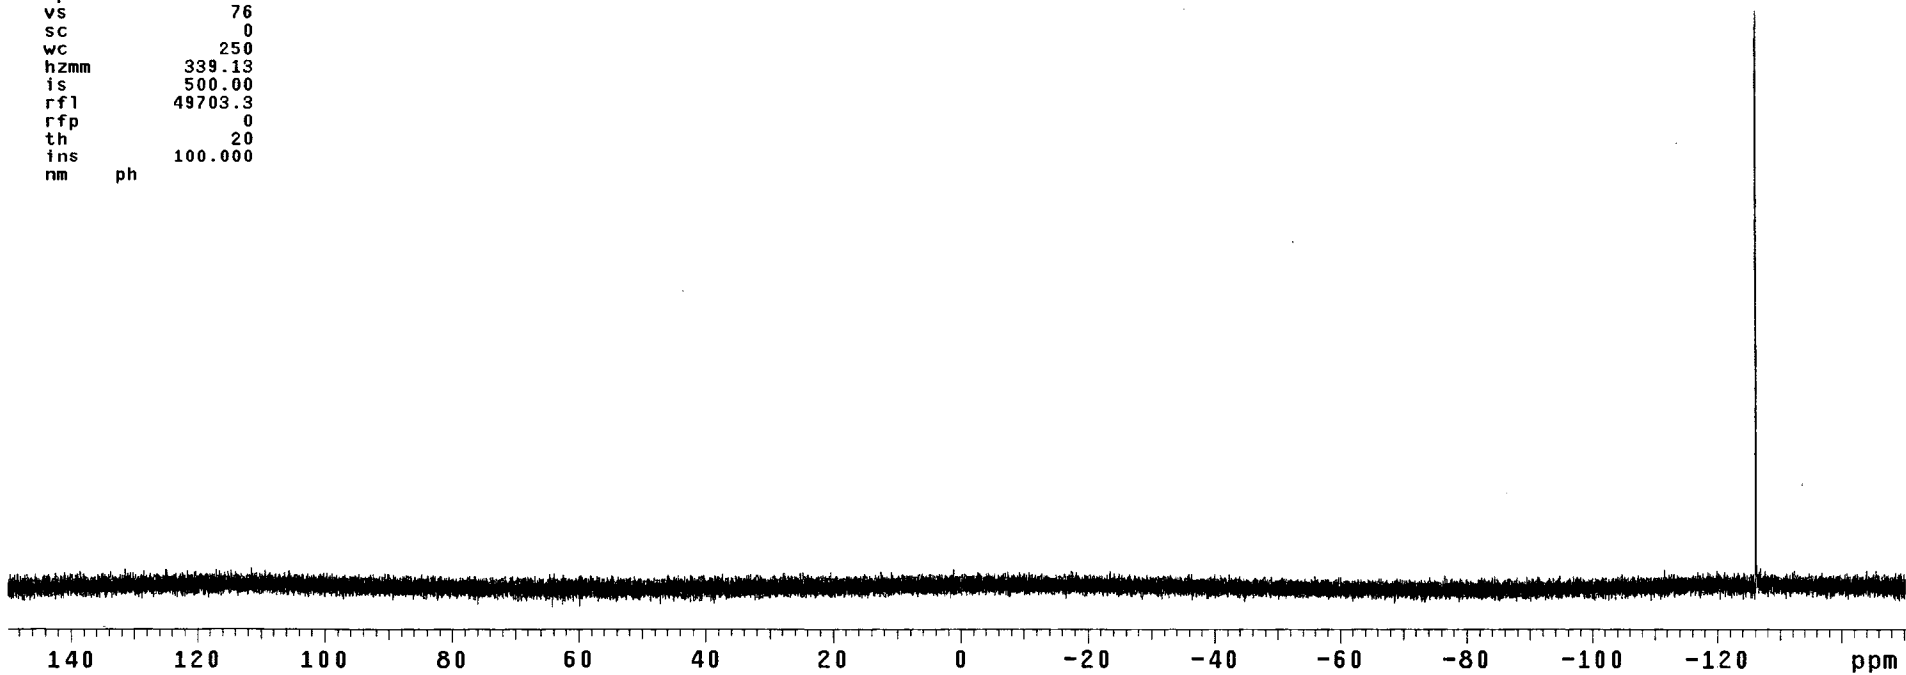



|             |          |            |         |
|-------------|----------|------------|---------|
| SAMPLE      |          | DEC. & VT  |         |
| solvent     | CD3CN    | dfrq       | 125.673 |
|             |          | dn         | C13     |
|             |          | dpwr       | 30      |
|             |          | dof        | 0       |
|             |          | dm         | nnn     |
|             |          | dmm        | w       |
|             |          | dmf        | 10000   |
|             |          | dseq       |         |
|             |          | dres       | 1.0     |
|             |          | homo       | n       |
| ACQUISITION |          | PROCESSING |         |
| sfrq        | 499.748  | wtfile     |         |
| tn          | H1       | proc       | ft      |
| at          | 3.001    | fn         | 262144  |
| np          | 63050    | math       | f       |
| sw          | 10504.2  |            |         |
| fb          | not used |            |         |
| bs          | 4        | werr       |         |
| tpwr        | 56       | wexp       |         |
| pw          | 8.6      | wbs        |         |
| d1          | 2.000    | wnt        | wft     |
| tof         | 1519.5   |            |         |
| nt          | 16       |            |         |
| ct          | 16       |            |         |
| alock       | n        |            |         |
| gain        | not used |            |         |
| FLAGS       |          |            |         |
| il          | n        |            |         |
| in          | n        |            |         |
| dp          | y        |            |         |
| hs          | nn       |            |         |
| DISPLAY     |          |            |         |
| sp          | -518.7   |            |         |
| wp          | 6521.7   |            |         |
| vs          | 11       |            |         |
| sc          | 0        |            |         |
| wc          | 250      |            |         |
| hzmm        | 26.09    |            |         |
| is          | 113.83   |            |         |
| rfl         | 2218.9   |            |         |
| rfp         | 969.5    |            |         |
| th          | 7        |            |         |
| ins         | 100.000  |            |         |
| ai          | ph       |            |         |

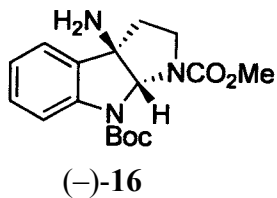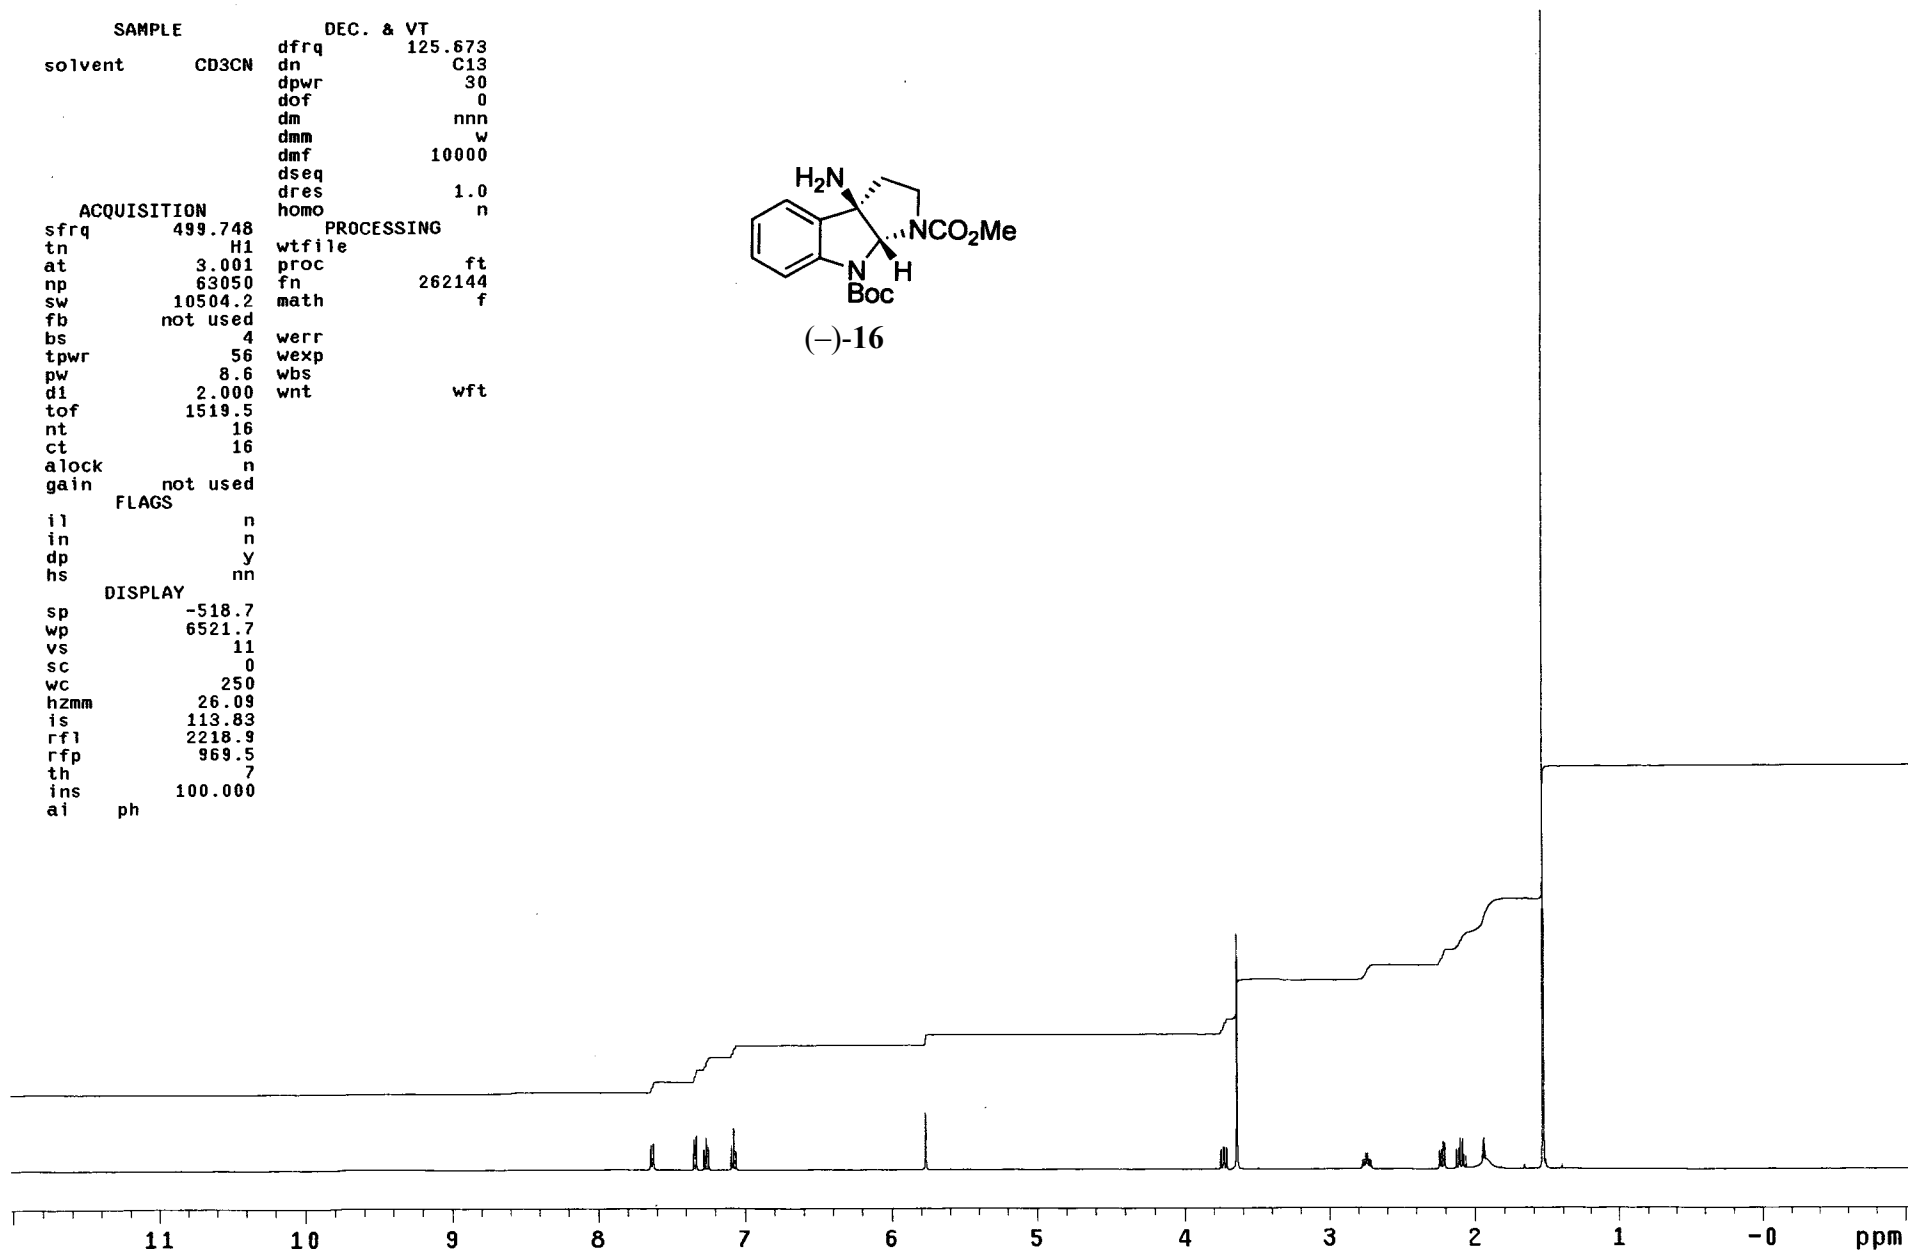

```
SAMPLE          DEC. & VT
solvent         CD3CN   dfrq      500.232
                dn       H1
                dpwr     39
                dof     -500.0
                dm       y
                dmm      w
                dmf      10000
                dseq
                dres     1.0
                homo    n
ACQUISITION
sfrq           125.795
tn             C13
at             1.736   wtfile
np            131010   proc
sw            37735.8  fn      131072
fb            not used math
bs            32
ss            1       werr
tpwr          58      wexp
pw            6.9     wbs
d1            0.763   wnt
tof           631.4
nt            20000
ct            6432
alock         n
gain          not used
FLAGS
il            n
in            n
dp            y
hs            nn
DISPLAY
sp            -2501.0
wp            30188.2
vs            361
sc            0
wc            250
hzmm         120.75
is            500.00
rfl          21072.7
rfp          14929.2
th            20
ins          1.000
ai           ph
```

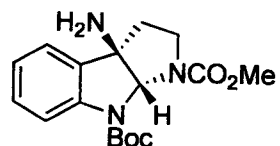

(-)-16

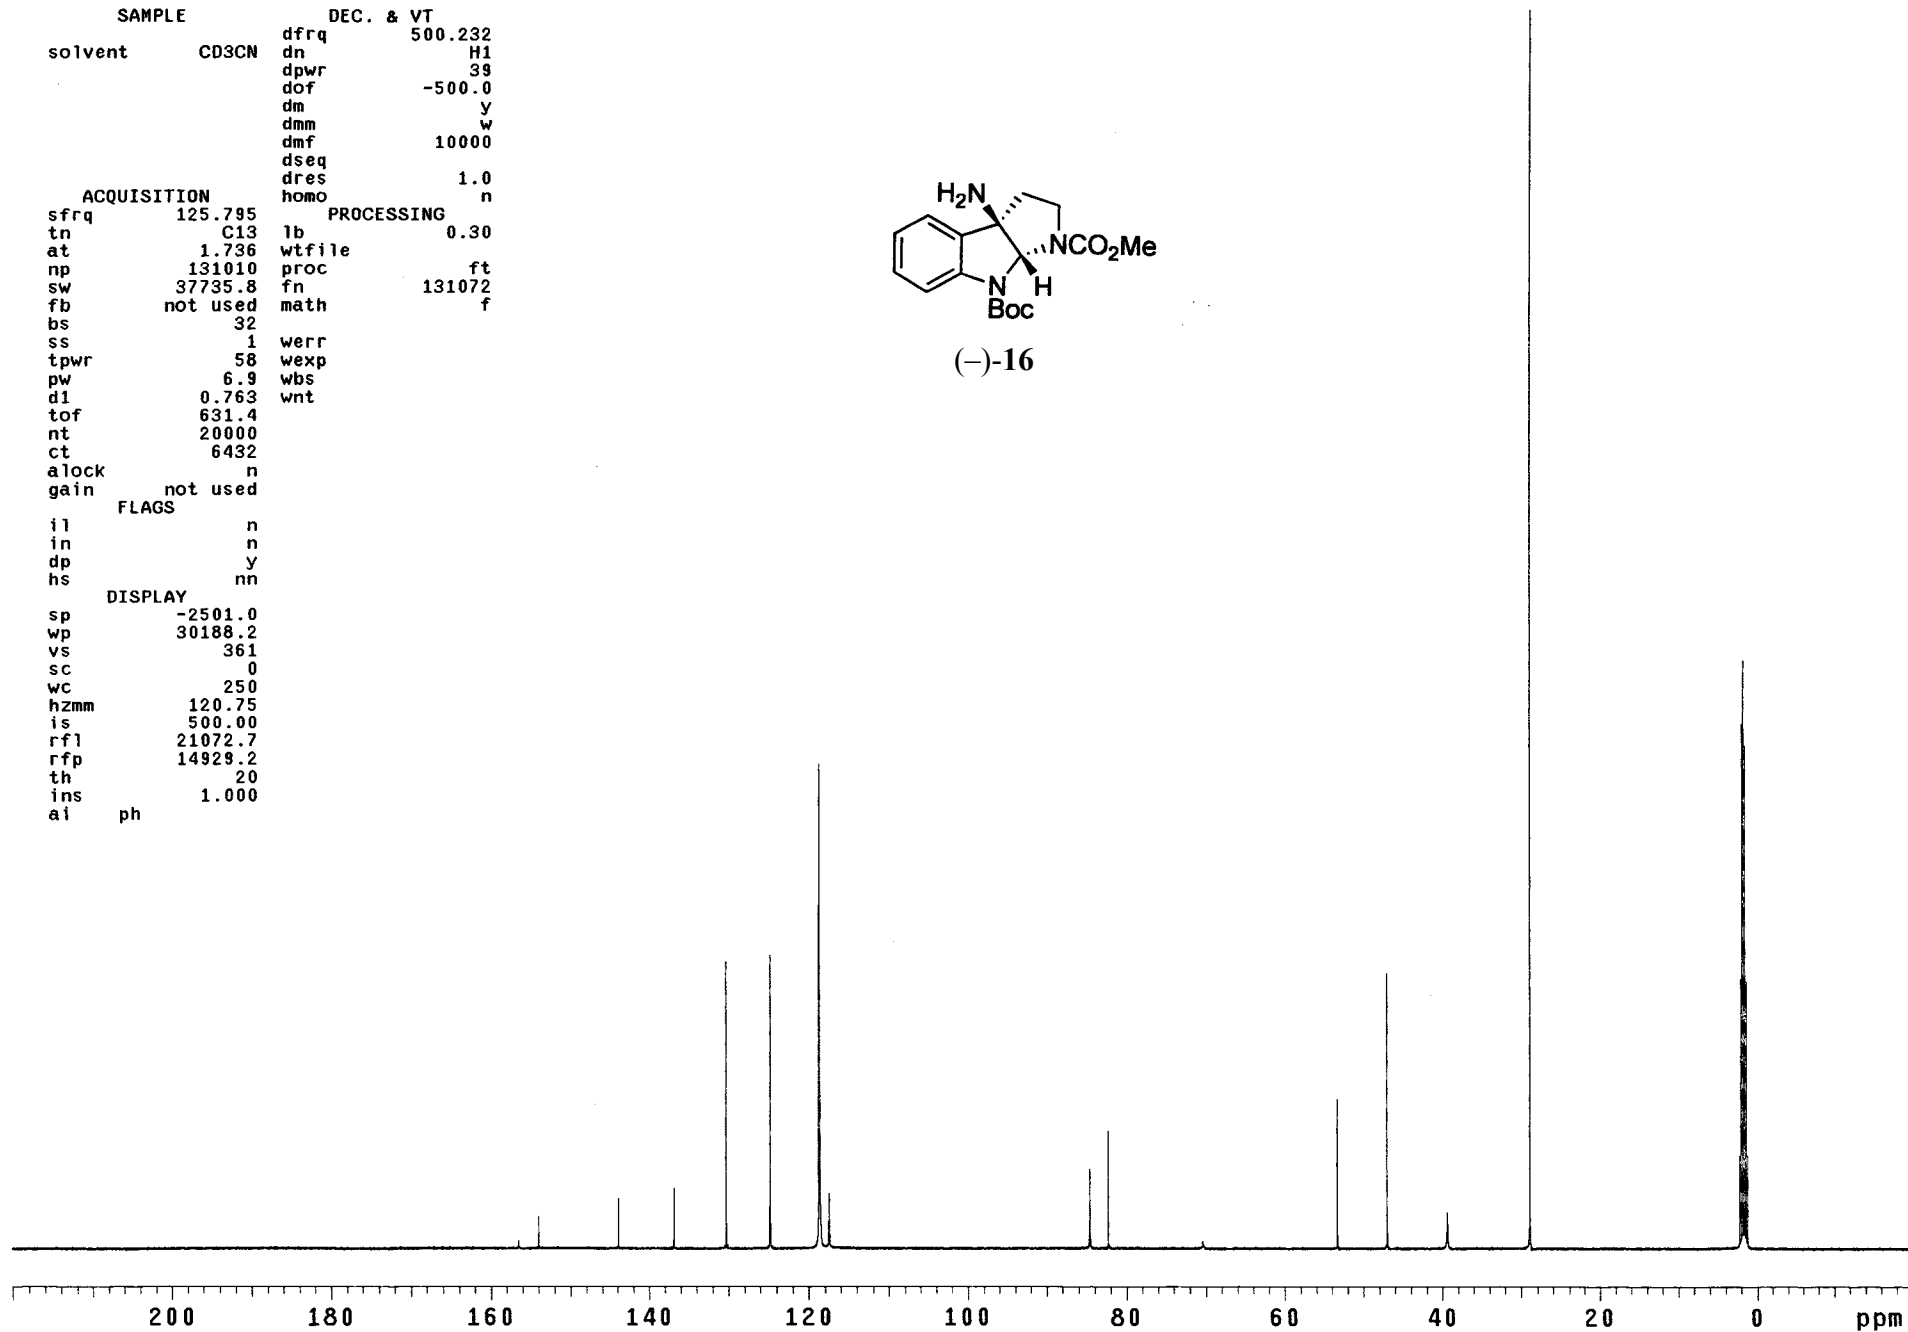

```
SAMPLE          DEC. & VT
solvent         CD3CN    dfrq      125.673
                 dn       C13
                 dpwr     30
                 dof      0
                 dm       nnn
                 dmm      w
                 dmf      10000
                 dseq
                 dres     1.0
                 homo     n
                 temp     70.0

ACQUISITION
sfrq           499.748
tn             H1
at             3.001  wtfile
np             63050  proc
sw             10504.2 fn      262144
fb             not used math
bs             4
tpwr           56  werr
pw             8.6  wexp
d1             2.000 wbs
tof           1519.5 wnt
nt             16
ct             16
alock          n
gain           not used

FLAGS
il             n
in             n
dp             y
hs            nn

DISPLAY
sp            -502.4
wp            6497.4
vs            12
sc            0
wc            250
hzmm         25.99
is            223.88
rf1           2217.6
rfp           969.5
th            7
ins           1.000
ai           ph
```

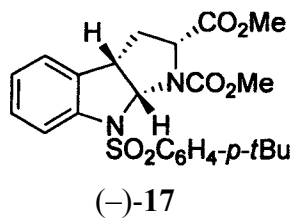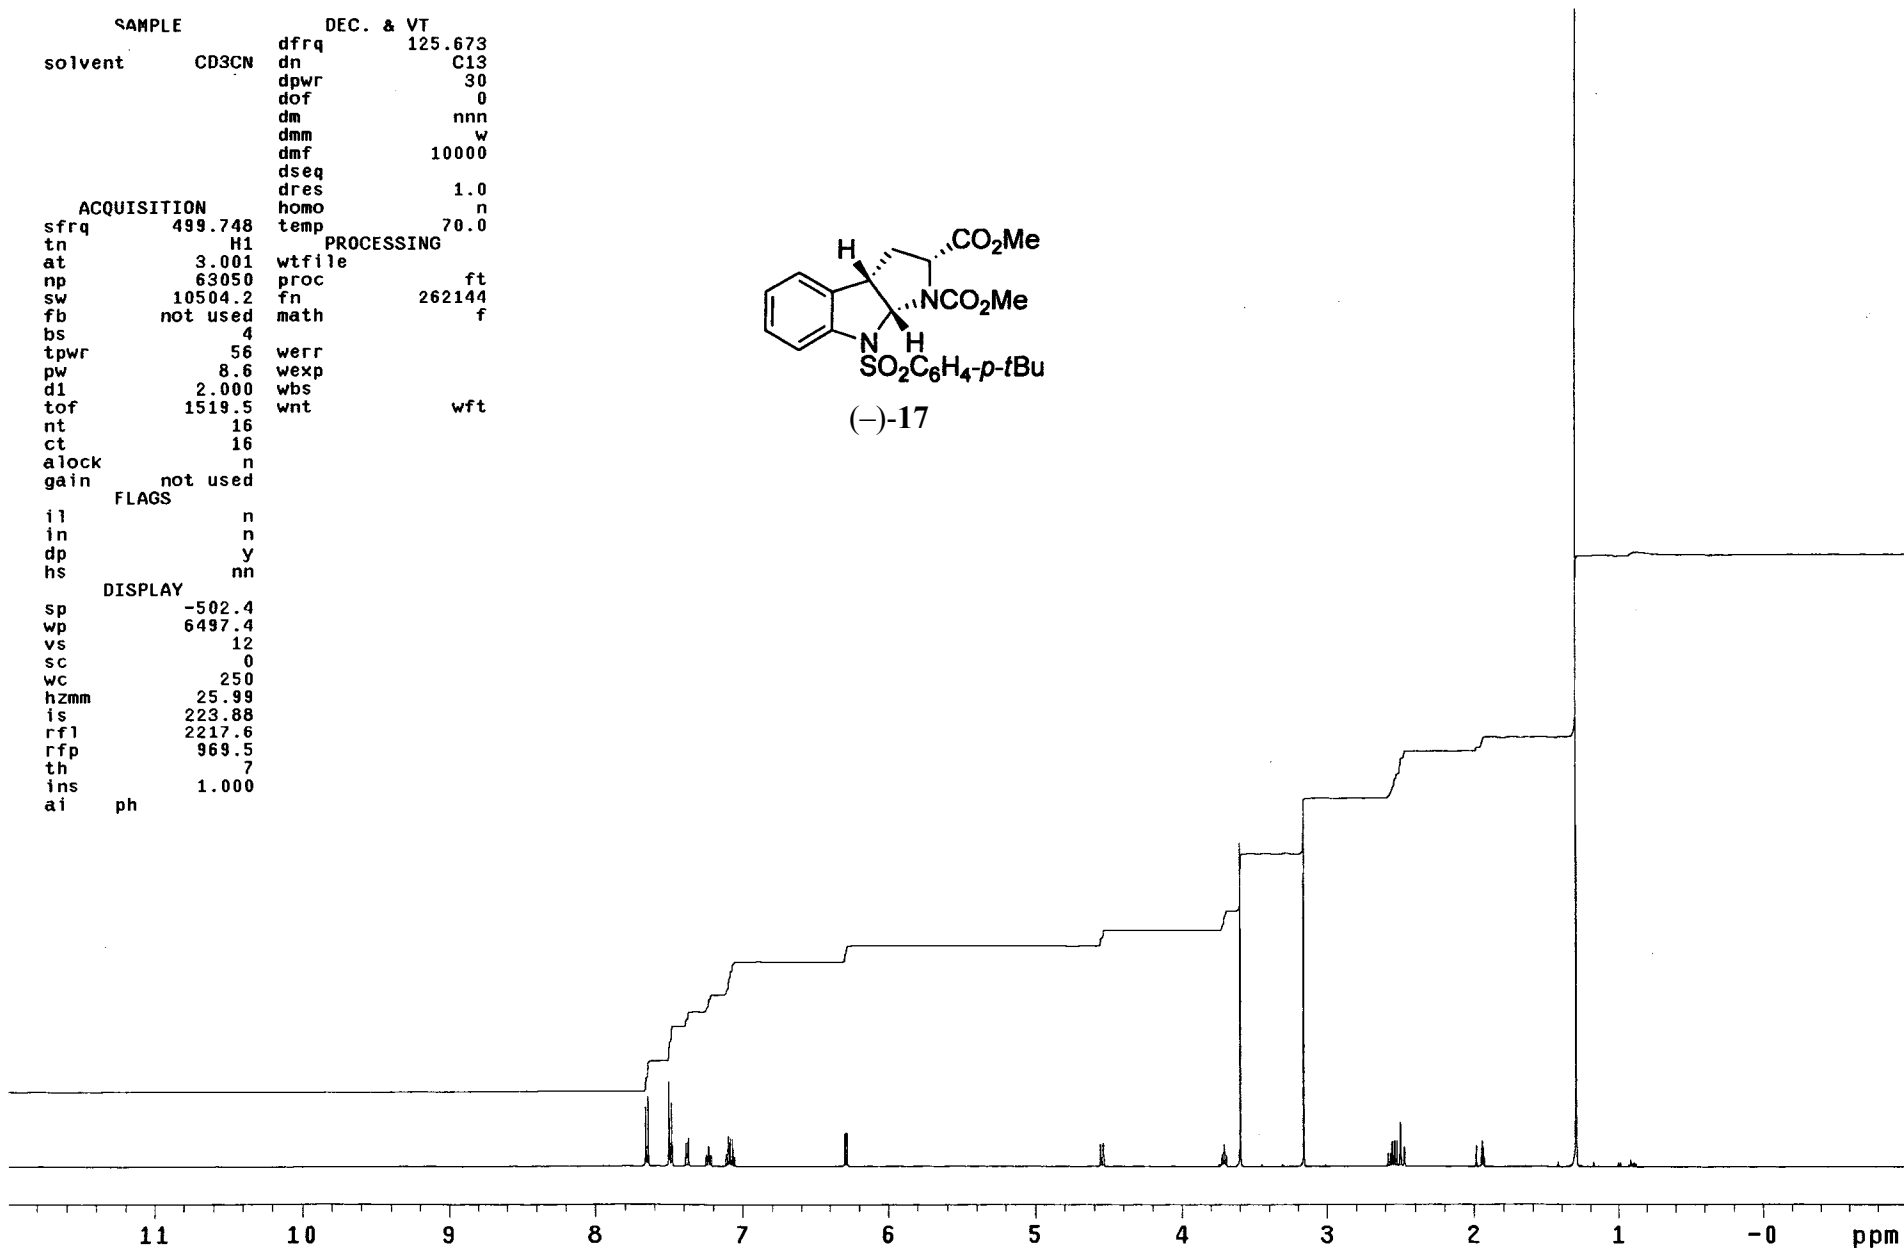

| SAMPLE      |          | DEC. & VT  |         |
|-------------|----------|------------|---------|
| solvent     | CD3CN    | dfrq       | 500.232 |
|             |          | dn         | H1      |
|             |          | dpwr       | 38      |
|             |          | dof        | -500.0  |
|             |          | dm         | y       |
|             |          | dmm        | w       |
|             |          | dmf        | 10700   |
|             |          | dseq       |         |
|             |          | dres       | 1.0     |
|             |          | homo       | n       |
|             |          | temp       | 70.0    |
| ACQUISITION |          | PROCESSING |         |
| sfrq        | 125.795  | lb         | 0.30    |
| tn          | C13      | wtfile     |         |
| at          | 1.736    | proc       | ft      |
| np          | 131010   | fn         | 131072  |
| sw          | 37735.8  | math       | f       |
| fb          | not used | werr       |         |
| bs          | 16       | wexp       |         |
| ss          | 1        | wbs        |         |
| tpwr        | 59       | wnt        |         |
| pw          | 6.9      |            |         |
| d1          | 0.763    |            |         |
| tof         | 631.4    |            |         |
| nt          | 10000    |            |         |
| ct          | 2912     |            |         |
| alock       | n        |            |         |
| gain        | not used |            |         |
| FLAGS       |          |            |         |
| il          | n        |            |         |
| in          | n        |            |         |
| dp          | y        |            |         |
| hs          | nn       |            |         |
| DISPLAY     |          |            |         |
| sp          | -2522.3  |            |         |
| wb          | 30199.7  |            |         |
| vs          | 333      |            |         |
| sc          | 0        |            |         |
| wc          | 250      |            |         |
| hzmm        | 120.80   |            |         |
| is          | 500.00   |            |         |
| rfl         | 21013.4  |            |         |
| rfp         | 14929.1  |            |         |
| th          | 20       |            |         |
| ins         | 1.000    |            |         |
| ai          | ph       |            |         |

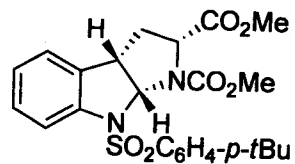

(-)-17

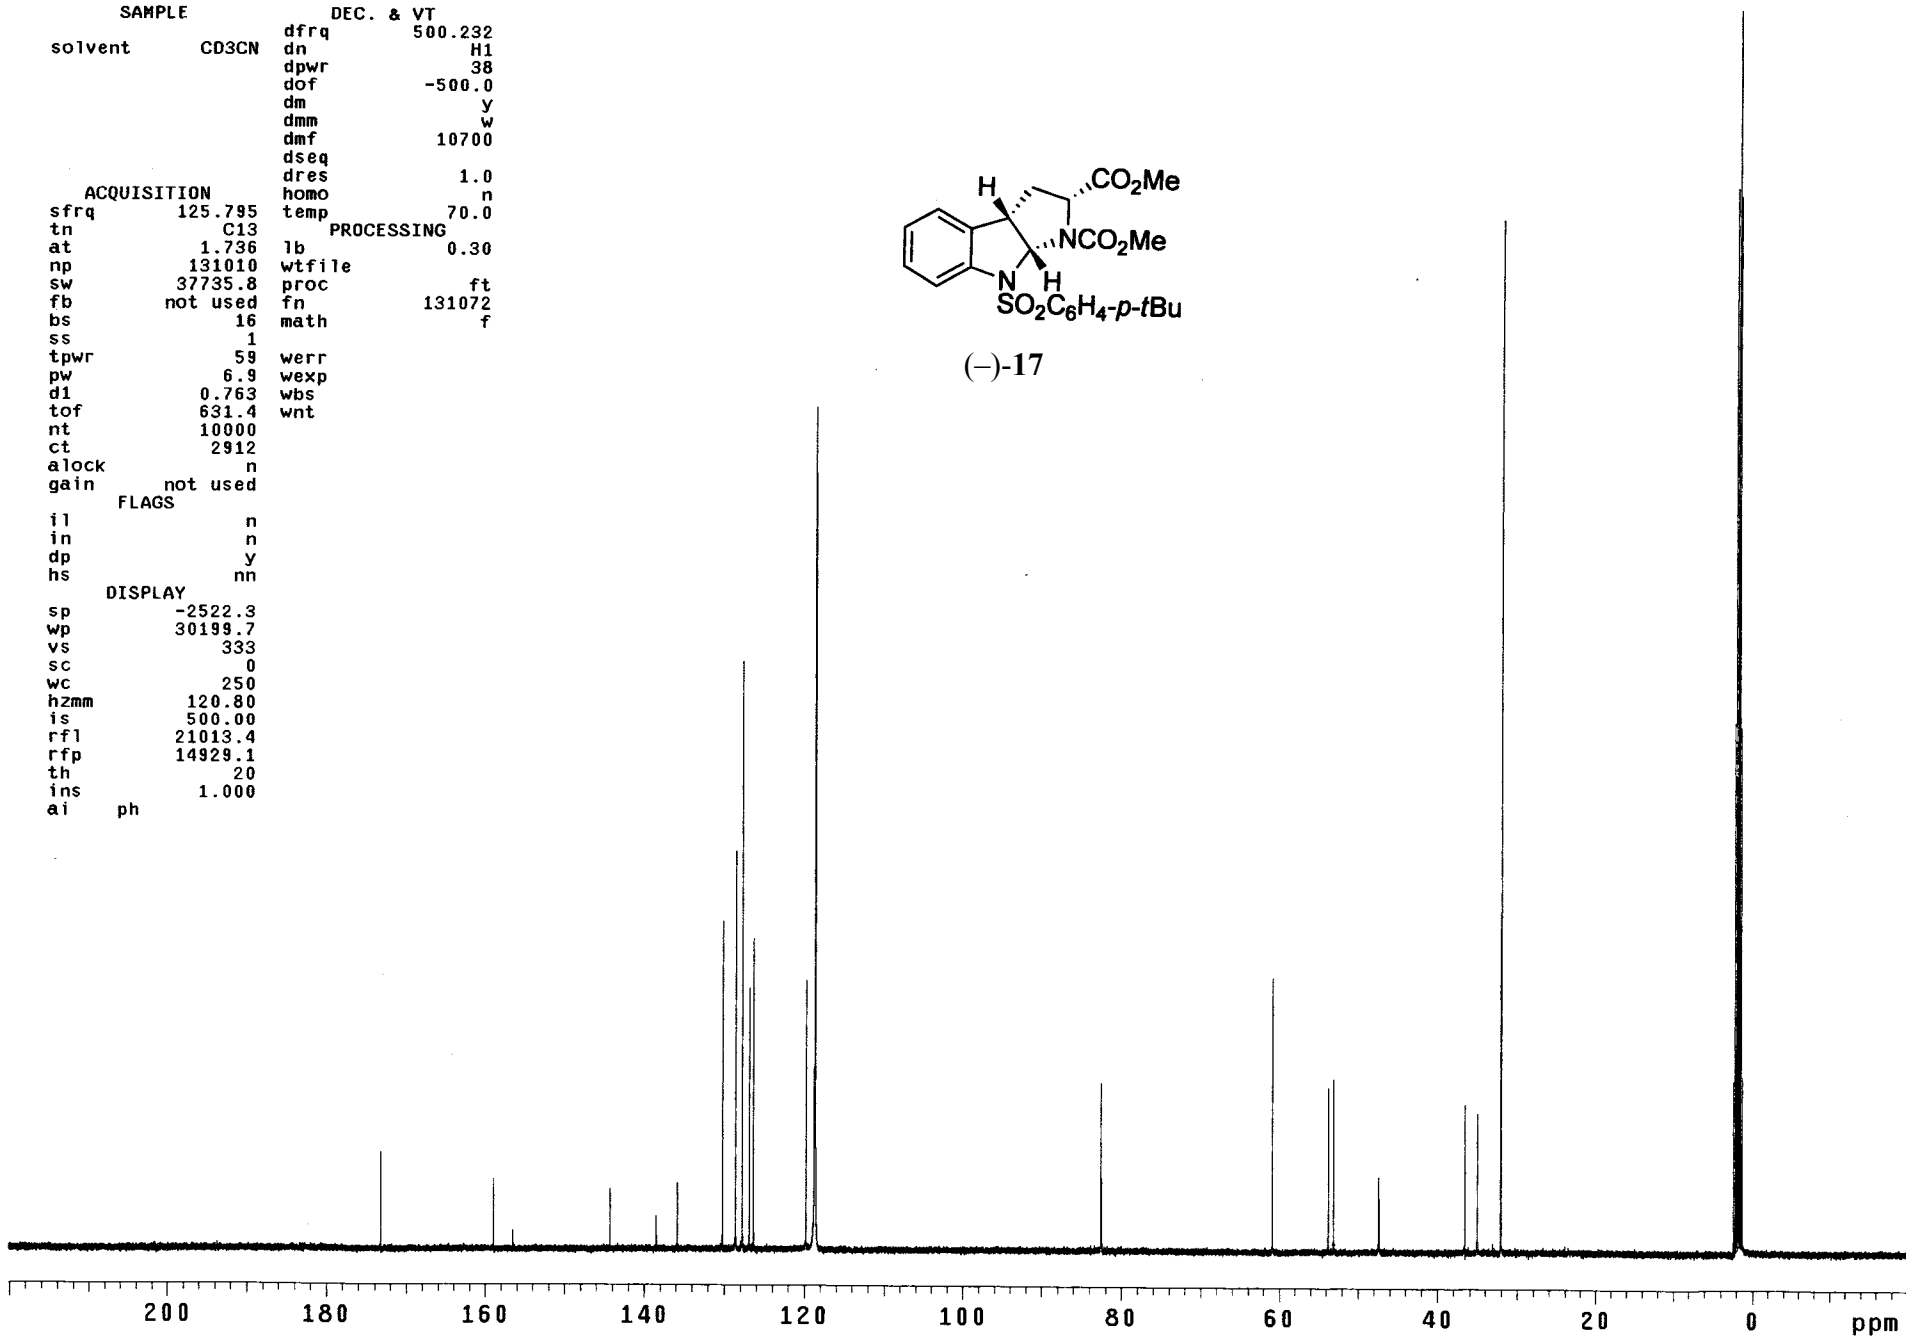

|             |          |            |         |
|-------------|----------|------------|---------|
| SAMPLE      |          | DEC. & VT  |         |
| solvent     | CD3CN    | dfrq       | 125.673 |
|             |          | dn         | C13     |
|             |          | dpwr       | 30      |
|             |          | dof        | 0       |
|             |          | dm         | nnn     |
|             |          | dmm        | w       |
|             |          | dmf        | 10000   |
|             |          | dseq       |         |
|             |          | dres       | 1.0     |
|             |          | homo       | n       |
|             |          | temp       | 70.0    |
| ACQUISITION |          | PROCESSING |         |
| sfrq        | 499.748  | wtfile     | ft      |
| tn          | H1       | proc       | 262144  |
| at          | 3.001    | fn         | f       |
| np          | 63050    | math       |         |
| sw          | 10504.2  |            |         |
| fb          | not used |            |         |
| bs          | 4        |            |         |
| tpwr        | 56       | werr       |         |
| pw          | 8.6      | wexp       |         |
| d1          | 2.000    | wbs        |         |
| tof         | 1519.5   | wnt        | wft     |
| nt          | 16       |            |         |
| ct          | 16       |            |         |
| alock       | n        |            |         |
| gain        | not used |            |         |
| FLAGS       |          |            |         |
| il          | n        |            |         |
| in          | n        |            |         |
| dp          | y        |            |         |
| hs          | nn       |            |         |
| DISPLAY     |          |            |         |
| sp          | -502.5   |            |         |
| wp          | 6497.4   |            |         |
| vs          | 10       |            |         |
| sc          | 0        |            |         |
| wc          | 250      |            |         |
| h2mm        | 25.99    |            |         |
| is          | 137.28   |            |         |
| rfl         | 2217.7   |            |         |
| rfp         | 969.5    |            |         |
| th          | 7        |            |         |
| ins         | 1.000    |            |         |
| ai          | ph       |            |         |

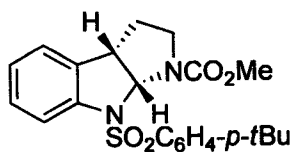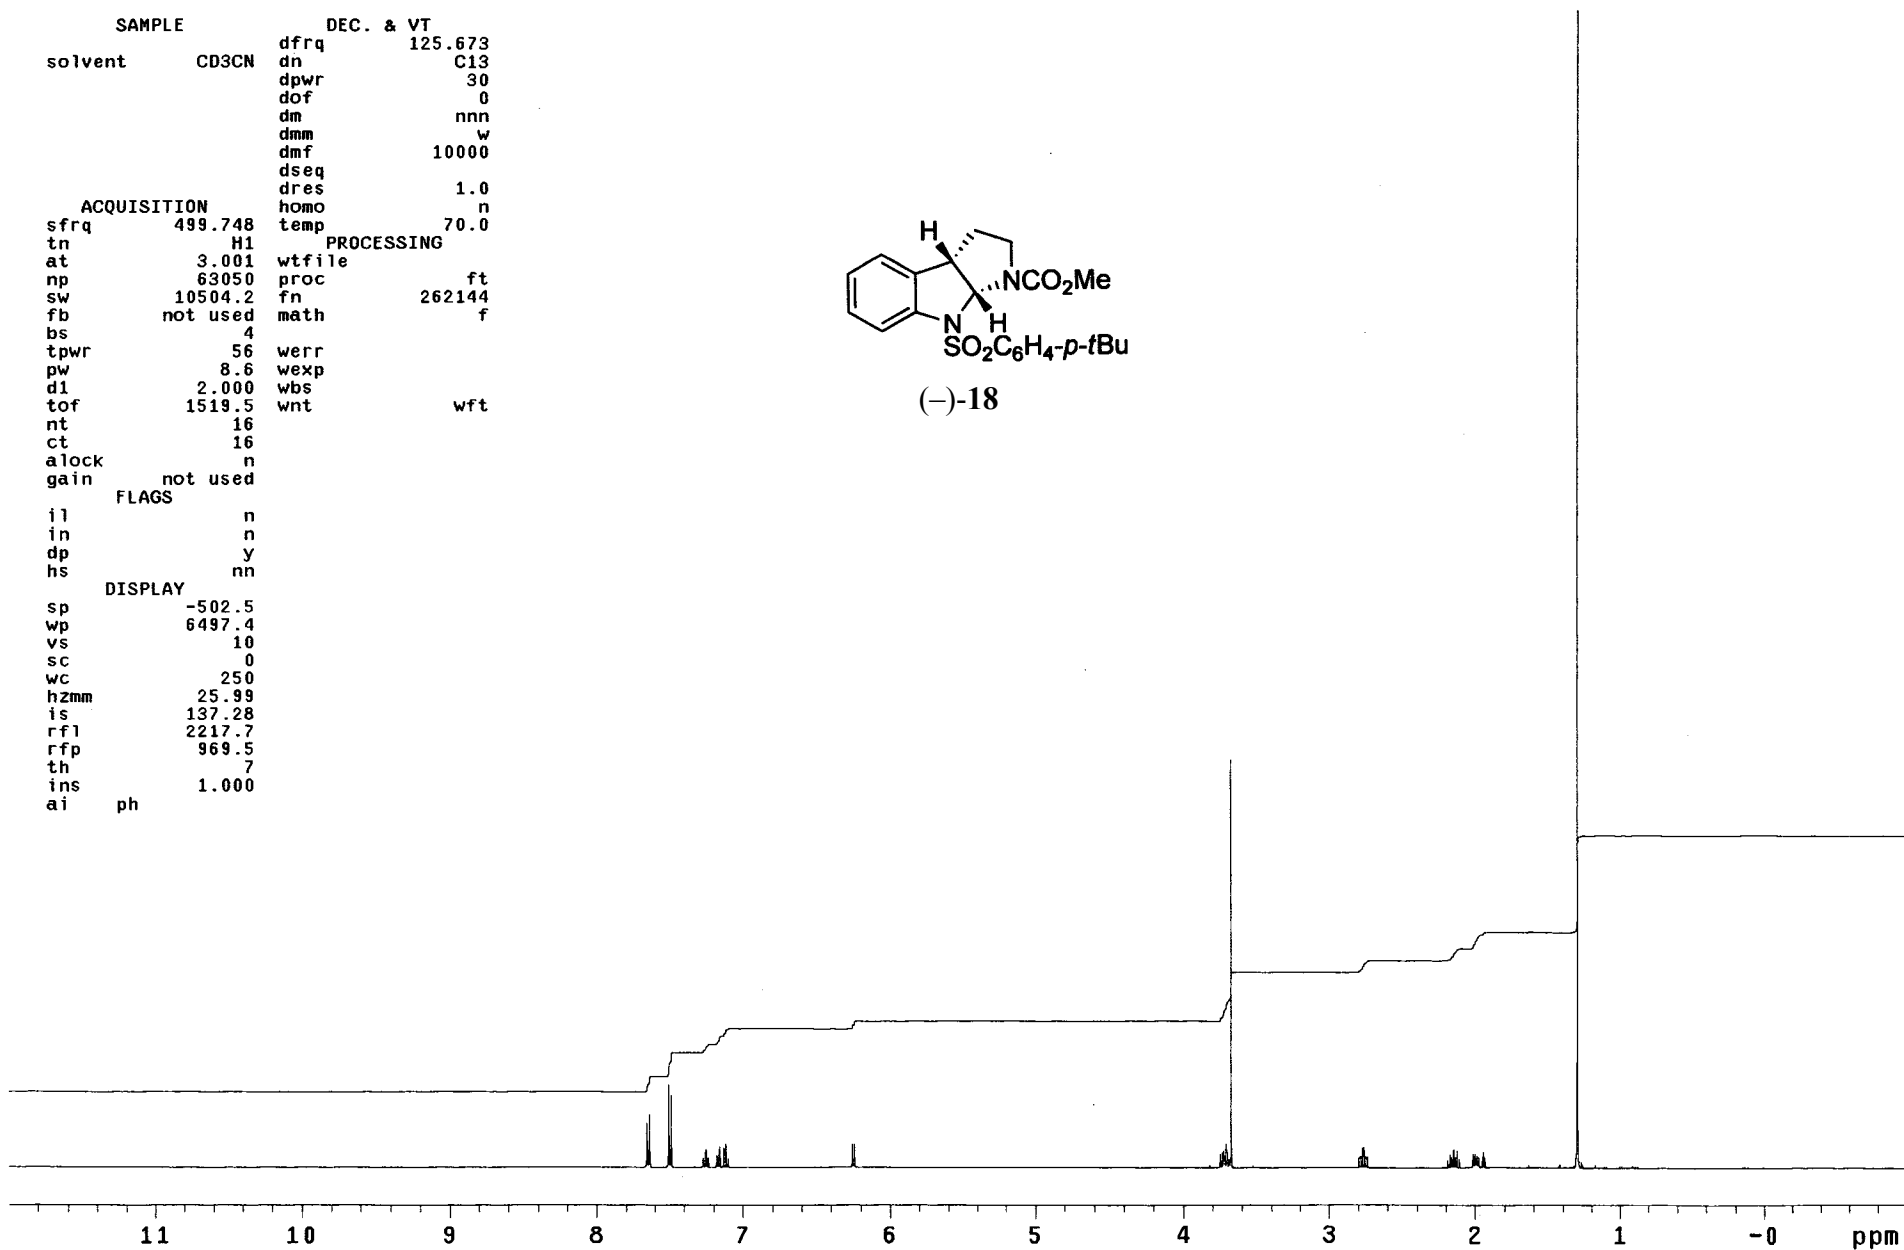

|             |          |            |         |
|-------------|----------|------------|---------|
| SAMPLE      |          | DEC. & VT  |         |
| solvent     | CD3CN    | dfrq       | 500.232 |
|             |          | dn         | H1      |
|             |          | dpwr       | 38      |
|             |          | dof        | -500.0  |
|             |          | dm         | y       |
|             |          | dmm        | w       |
|             |          | dmf        | 10700   |
|             |          | dseq       |         |
|             |          | dres       | 1.0     |
| ACQUISITION |          | homo       | n       |
| sfrq        | 125.795  | temp       | 70.0    |
| tn          | C13      | PROCESSING |         |
| at          | 1.736    | lb         | 0.30    |
| np          | 131010   | wtfile     |         |
| sw          | 37735.8  | proc       | ft      |
| fb          | not used | fn         | 131072  |
| bs          | 16       | math       | f       |
| ss          | 1        |            |         |
| tpwr        | 59       | werr       |         |
| pw          | 6.9      | wexp       |         |
| d1          | 0.763    | wbs        |         |
| tof         | 631.4    | wnt        |         |
| nt          | 10000    |            |         |
| ct          | 1856     |            |         |
| alock       | n        |            |         |
| gain        | not used |            |         |
| FLAGS       |          |            |         |
| il          | n        |            |         |
| in          | n        |            |         |
| dp          | y        |            |         |
| hs          | nn       |            |         |
| DISPLAY     |          |            |         |
| sp          | -2553.4  |            |         |
| wp          | 30264.2  |            |         |
| vs          | 126      |            |         |
| sc          | 0        |            |         |
| wc          | 250      |            |         |
| hzmm        | 121.06   |            |         |
| is          | 500.00   |            |         |
| rfl         | 21012.2  |            |         |
| rfp         | 14929.1  |            |         |
| th          | 20       |            |         |
| ins         | 1.000    |            |         |
| ai          | ph       |            |         |

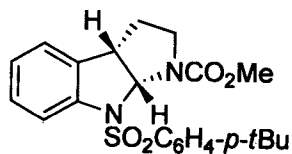

(-)-18

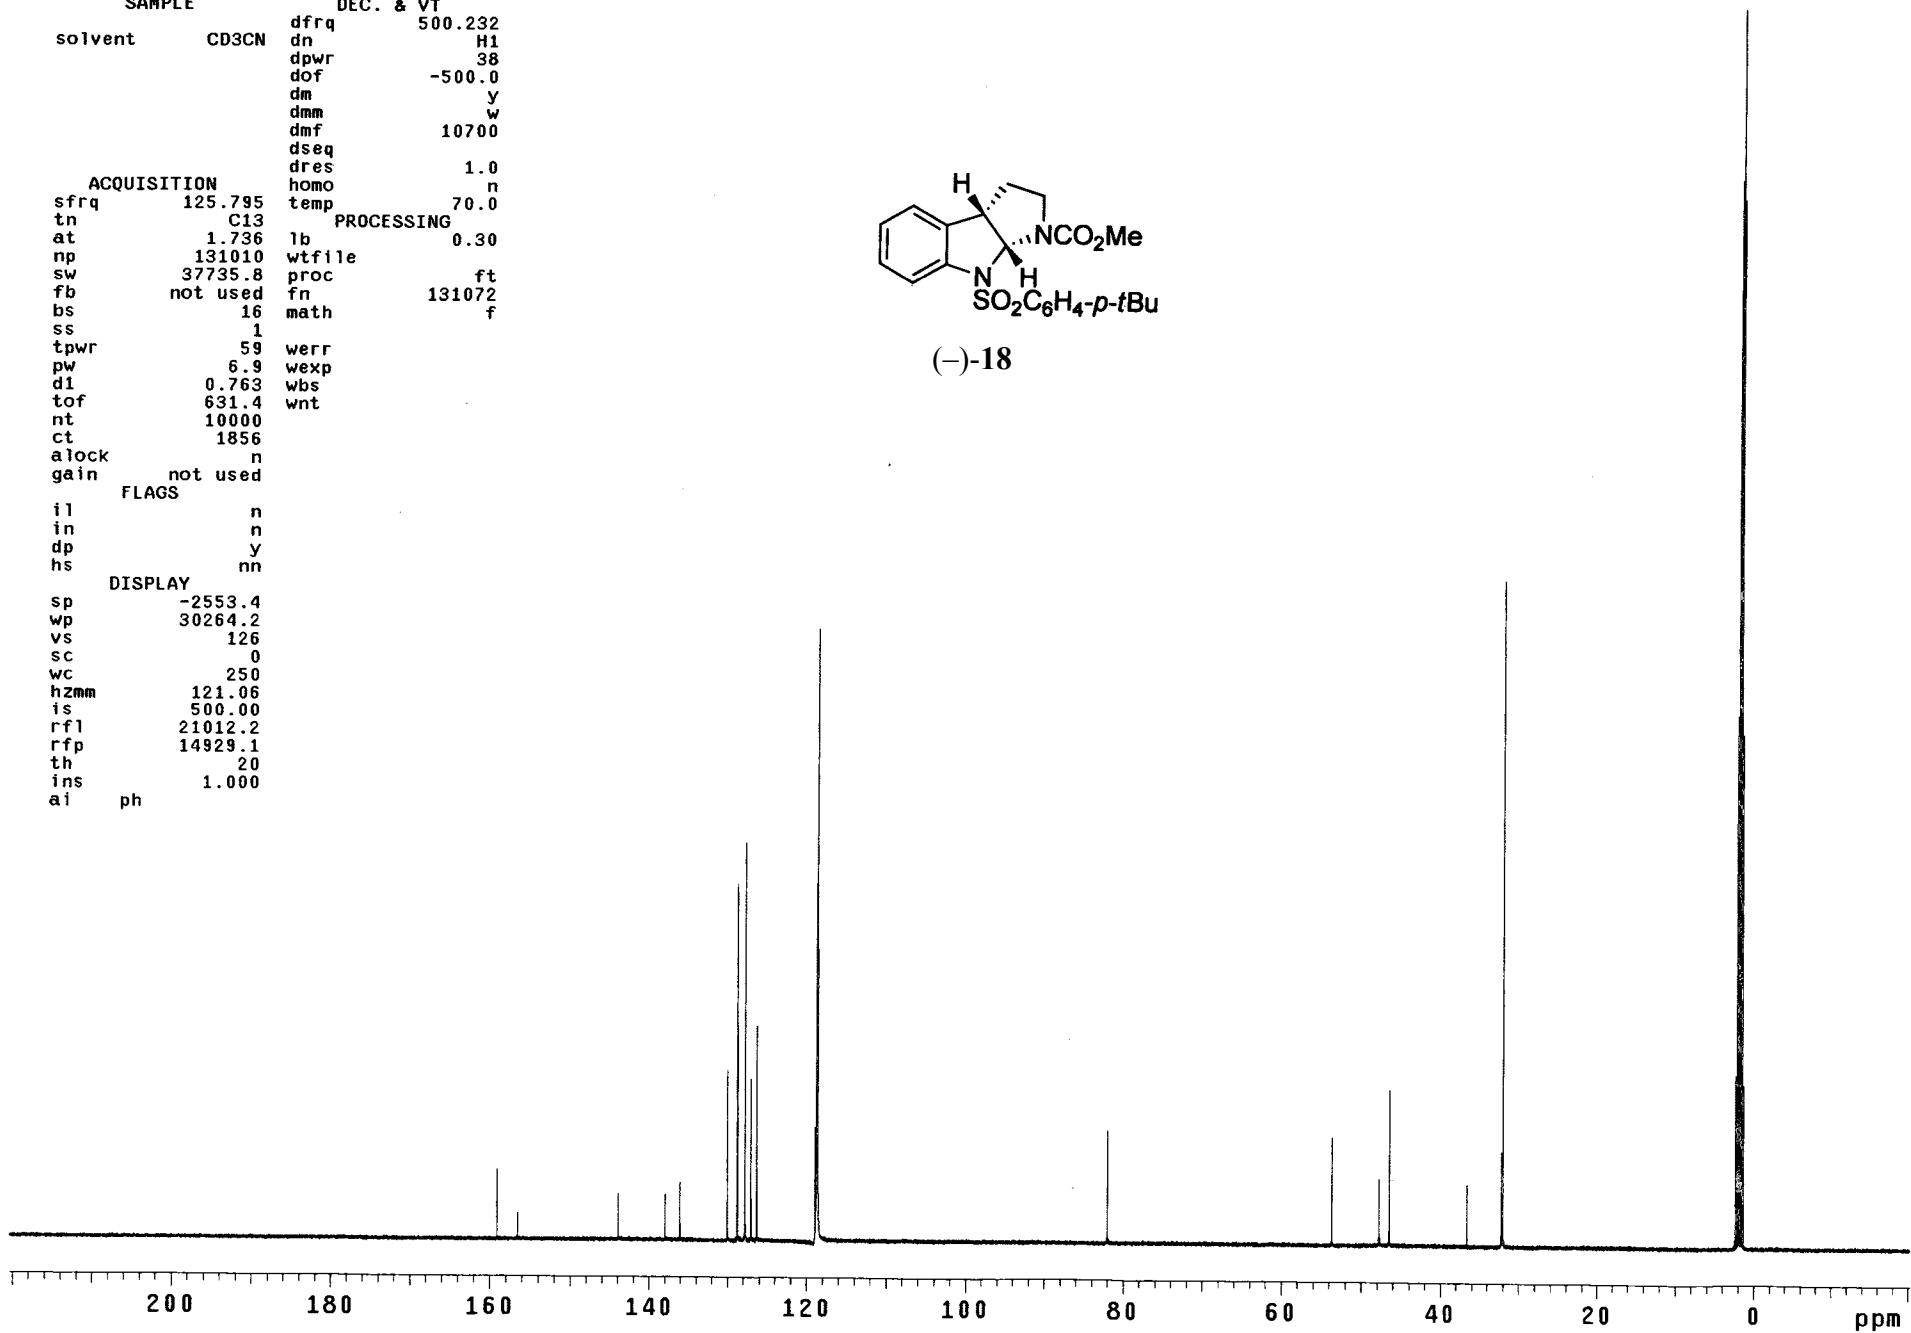

|             |          |            |         |
|-------------|----------|------------|---------|
| SAMPLE      |          | DEC. & VT  |         |
| solvent     | CDC13    | dfrq       | 125.672 |
|             |          | dn         | C13     |
|             |          | dpwr       | 30      |
|             |          | dof        | 0       |
|             |          | dm         | nnn     |
|             |          | dmm        | w       |
|             |          | dmf        | 10000   |
|             |          | dseq       |         |
|             |          | dres       | 1.0     |
|             |          | homo       | n       |
| ACQUISITION |          | PROCESSING |         |
| sfrq        | 499.746  | wtfile     |         |
| tn          | H1       | proc       | ft      |
| at          | 3.001    | fn         | 262144  |
| np          | 63050    | math       | f       |
| sw          | 10504.2  |            |         |
| fb          | not used |            |         |
| bs          | 4        | werr       |         |
| tpwr        | 56       | wexp       |         |
| pw          | 8.6      | wbs        |         |
| d1          | 2.000    | wnt        | wft     |
| tof         | 1519.5   |            |         |
| nt          | 16       |            |         |
| ct          | 16       |            |         |
| alock       | n        |            |         |
| gain        | not used |            |         |
| FLAGS       |          |            |         |
| il          | n        |            |         |
| in          | n        |            |         |
| dp          | y        |            |         |
| hs          | nn       |            |         |
| DISPLAY     |          |            |         |
| sp          | -508.0   |            |         |
| wp          | 6494.3   |            |         |
| vs          | 17       |            |         |
| sc          | 0        |            |         |
| wc          | 250      |            |         |
| hzmm        | 25.98    |            |         |
| is          | 268.59   |            |         |
| rfl         | 4866.0   |            |         |
| rfp         | 3618.1   |            |         |
| th          | 7        |            |         |
| ins         | 100.000  |            |         |
| ai          | ph       |            |         |

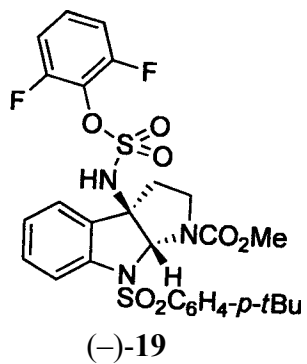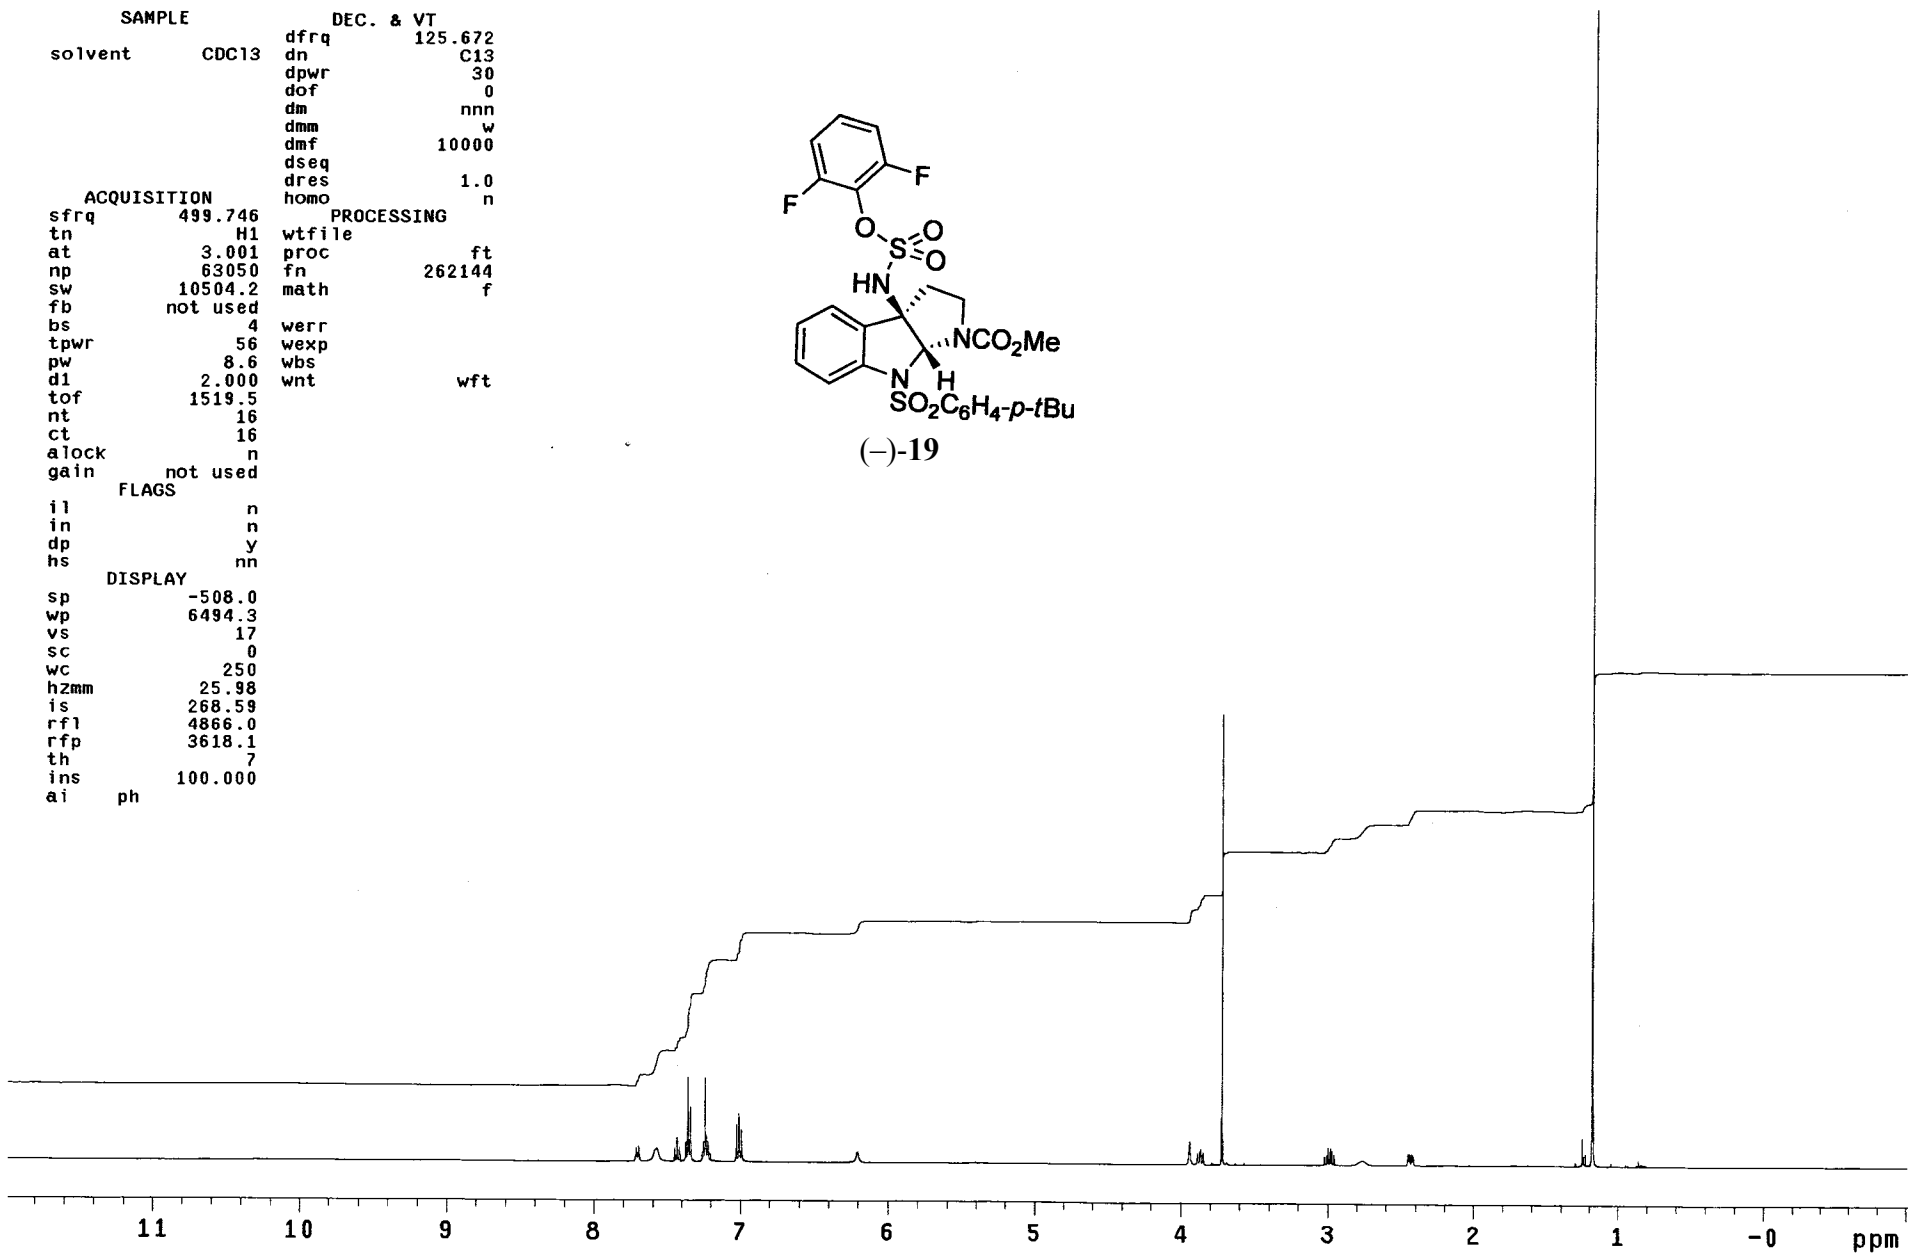

|             |          |            |         |
|-------------|----------|------------|---------|
| SAMPLE      |          | DEC. & VT  |         |
| solvent     | CDC13    | dfrq       | 500.229 |
|             |          | dn         | H1      |
|             |          | dpwr       | 38      |
|             |          | dof        | -500.0  |
|             |          | dm         | y       |
|             |          | dmm        | w       |
|             |          | dmf        | 10700   |
|             |          | dseq       |         |
|             |          | dres       | 1.0     |
|             |          | homo       | n       |
| ACQUISITION |          | PROCESSING |         |
| sfrq        | 125.795  | lb         | 0.30    |
| tn          | C13      | wtfile     |         |
| at          | 1.736    | proc       | ft      |
| np          | 131010   | fn         | 131072  |
| sw          | 37735.8  | math       | f       |
| fb          | not used |            |         |
| bs          | 16       |            |         |
| ss          | 1        | werr       |         |
| tpwr        | 59       | wexp       |         |
| pw          | 6.9      | wbs        |         |
| d1          | 0.763    | wnt        |         |
| tof         | 631.4    |            |         |
| nt          | 20000    |            |         |
| ct          | 6512     |            |         |
| alock       | n        |            |         |
| gain        | not used |            |         |
| FLAGS       |          |            |         |
| il          | n        |            |         |
| in          | n        |            |         |
| dp          | y        |            |         |
| hs          | nn       |            |         |
| DISPLAY     |          |            |         |
| sp          | -2549.9  |            |         |
| wp          | 30220.5  |            |         |
| vs          | 222      |            |         |
| sc          | 0        |            |         |
| wc          | 250      |            |         |
| hzm         | 120.88   |            |         |
| is          | 500.00   |            |         |
| rfl         | 16005.0  |            |         |
| rfp         | 9714.2   |            |         |
| th          | 20       |            |         |
| ins         | 1.000    |            |         |
| ai          | ph       |            |         |

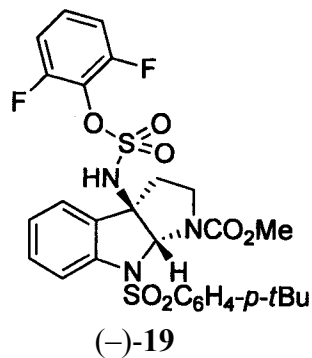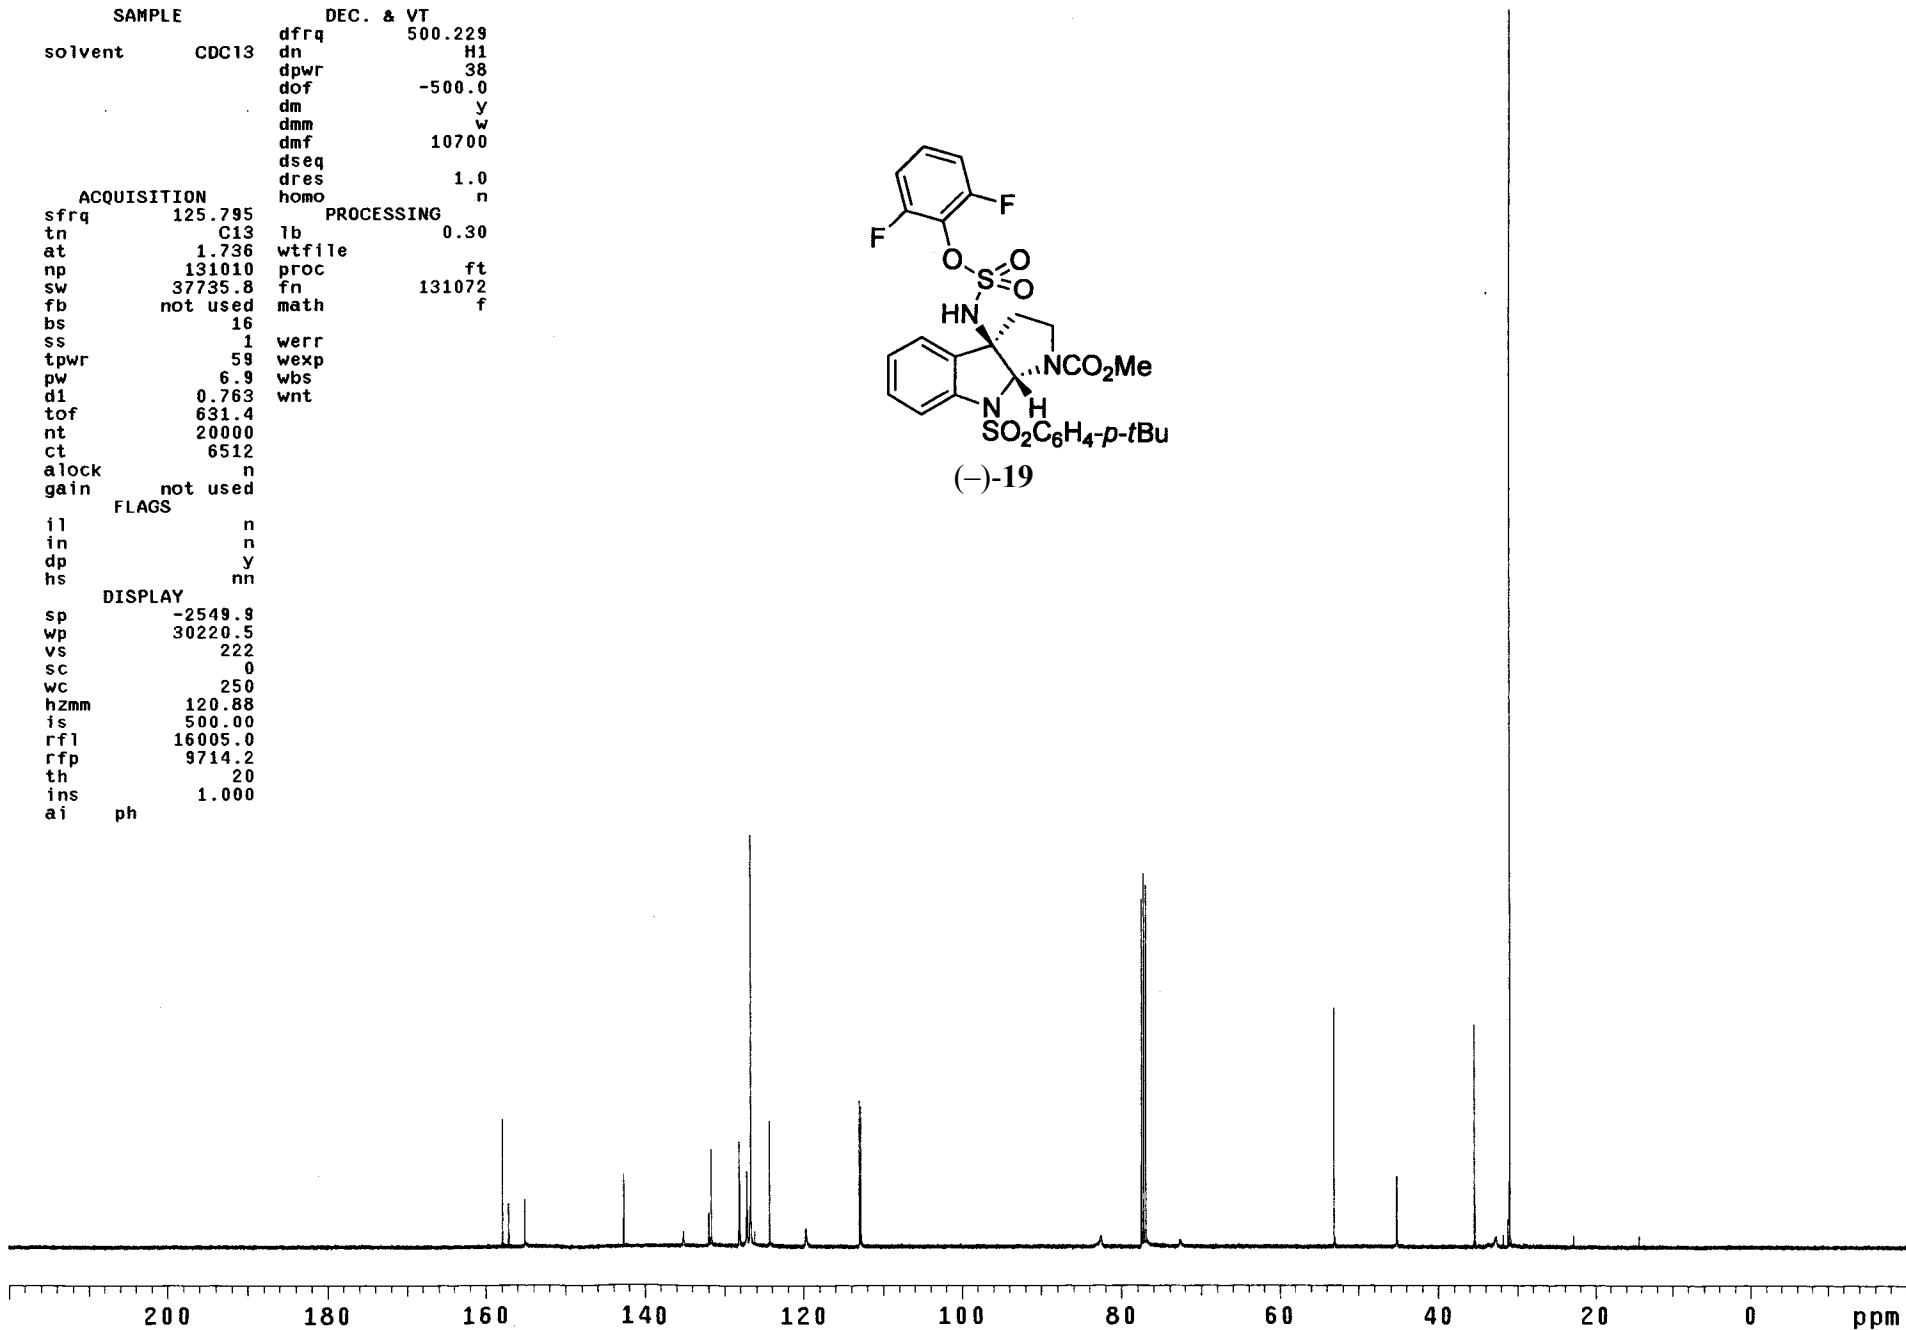



```

SAMPLE          DEC. & VT
solvent         CDC13    dfrq      300.107
                   dn        H1
                   dpwr      30
                   dof        0
                   dm         nnn
                   dmm        c
                   dmf        200
                   PROCESSING
                   lb         0.30
ACQUISITION     wtfile
sfrq           282.382   proc      ft
tn             F19      fn        262144
at             0.300
np             59906    werr
sw            100000.0   wexp
fb             55000    wbs
bs             4        wnt
tpwr           56
pw             11.0
d1             4.000
tof           29637.2
nt             32
ct             16
alock         n
gain          not used
FLAGS
il            n
in            n
dp            Y
DISPLAY
sp           -42384.3
wp           84781.6
vs           43
sc           0
wc           250
h2mm        339.13
is           500.00
rfl         49862.6
rfp         0
th          47
ins         100.000
nm          ph
    
```

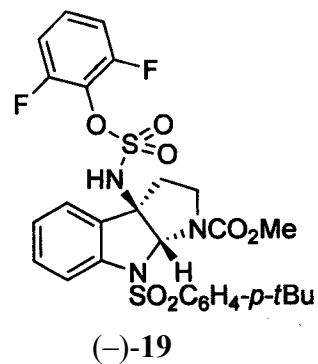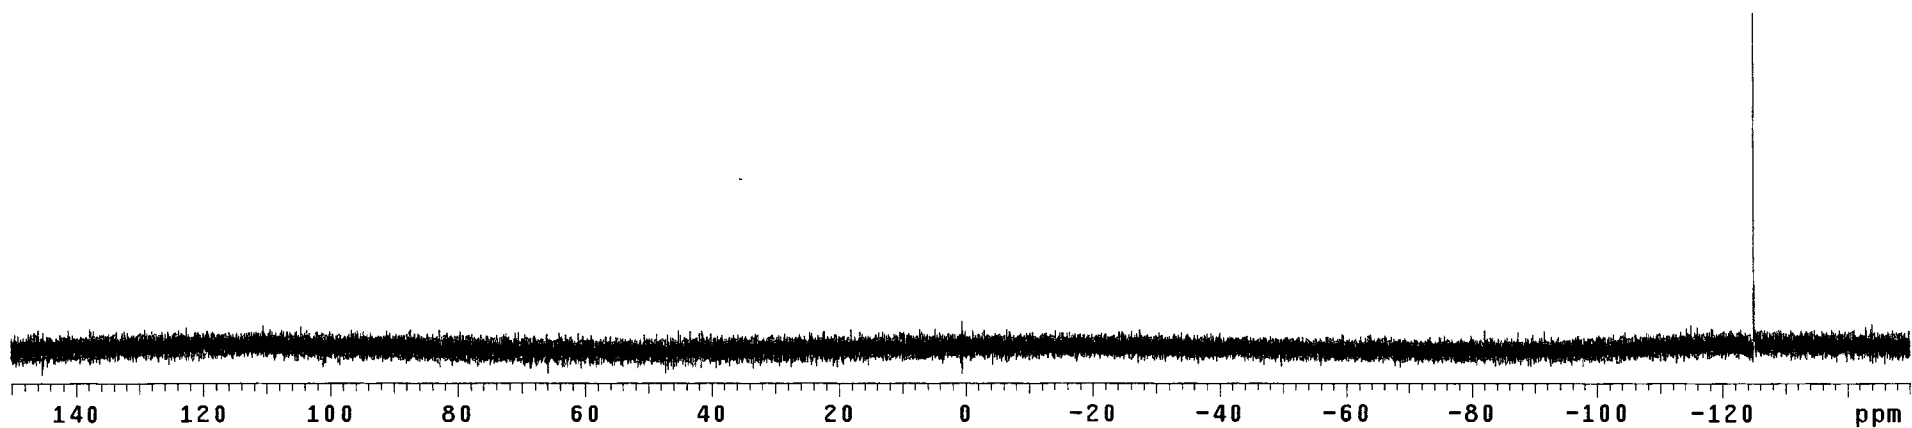

|             |          |            |         |
|-------------|----------|------------|---------|
| SAMPLE      |          | DEC. & VT  |         |
| solvent     | CD3CN    | dfrq       | 125.673 |
|             |          | dn         | C13     |
|             |          | dpwr       | 30      |
|             |          | dof        | 0       |
|             |          | dm         | nnn     |
|             |          | dmm        | w       |
|             |          | dof        | 10000   |
|             |          | dseq       |         |
|             |          | dres       | 1.0     |
|             |          | homo       | n       |
|             |          | temp       | 70.0    |
| ACQUISITION |          | PROCESSING |         |
| sfrq        | 499.748  | wtfile     |         |
| tn          | H1       | proc       | ft      |
| at          | 3.001    | fn         | 262144  |
| np          | 63050    | math       | f       |
| sw          | 10504.2  |            |         |
| fb          | not used |            |         |
| bs          | 4        |            |         |
| tpwr        | 56       | werr       |         |
| pw          | 8.6      | wexp       |         |
| d1          | 2.000    | wbs        |         |
| tof         | 1519.5   | wnt        | wft     |
| nt          | 16       |            |         |
| ct          | 16       |            |         |
| alock       | n        |            |         |
| gain        | not used |            |         |
| FLAGS       |          |            |         |
| il          | n        |            |         |
| in          | n        |            |         |
| dp          | y        |            |         |
| hs          | nn       |            |         |
| DISPLAY     |          |            |         |
| sp          | -509.2   |            |         |
| wp          | 6503.4   |            |         |
| vs          | 27       |            |         |
| sc          | 0        |            |         |
| wc          | 250      |            |         |
| hzmm        | 26.01    |            |         |
| is          | 115.71   |            |         |
| rfl         | 2218.5   |            |         |
| rff         | 969.5    |            |         |
| th          | 7        |            |         |
| ins         | 100.000  |            |         |
| ai          | ph       |            |         |

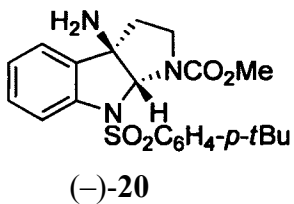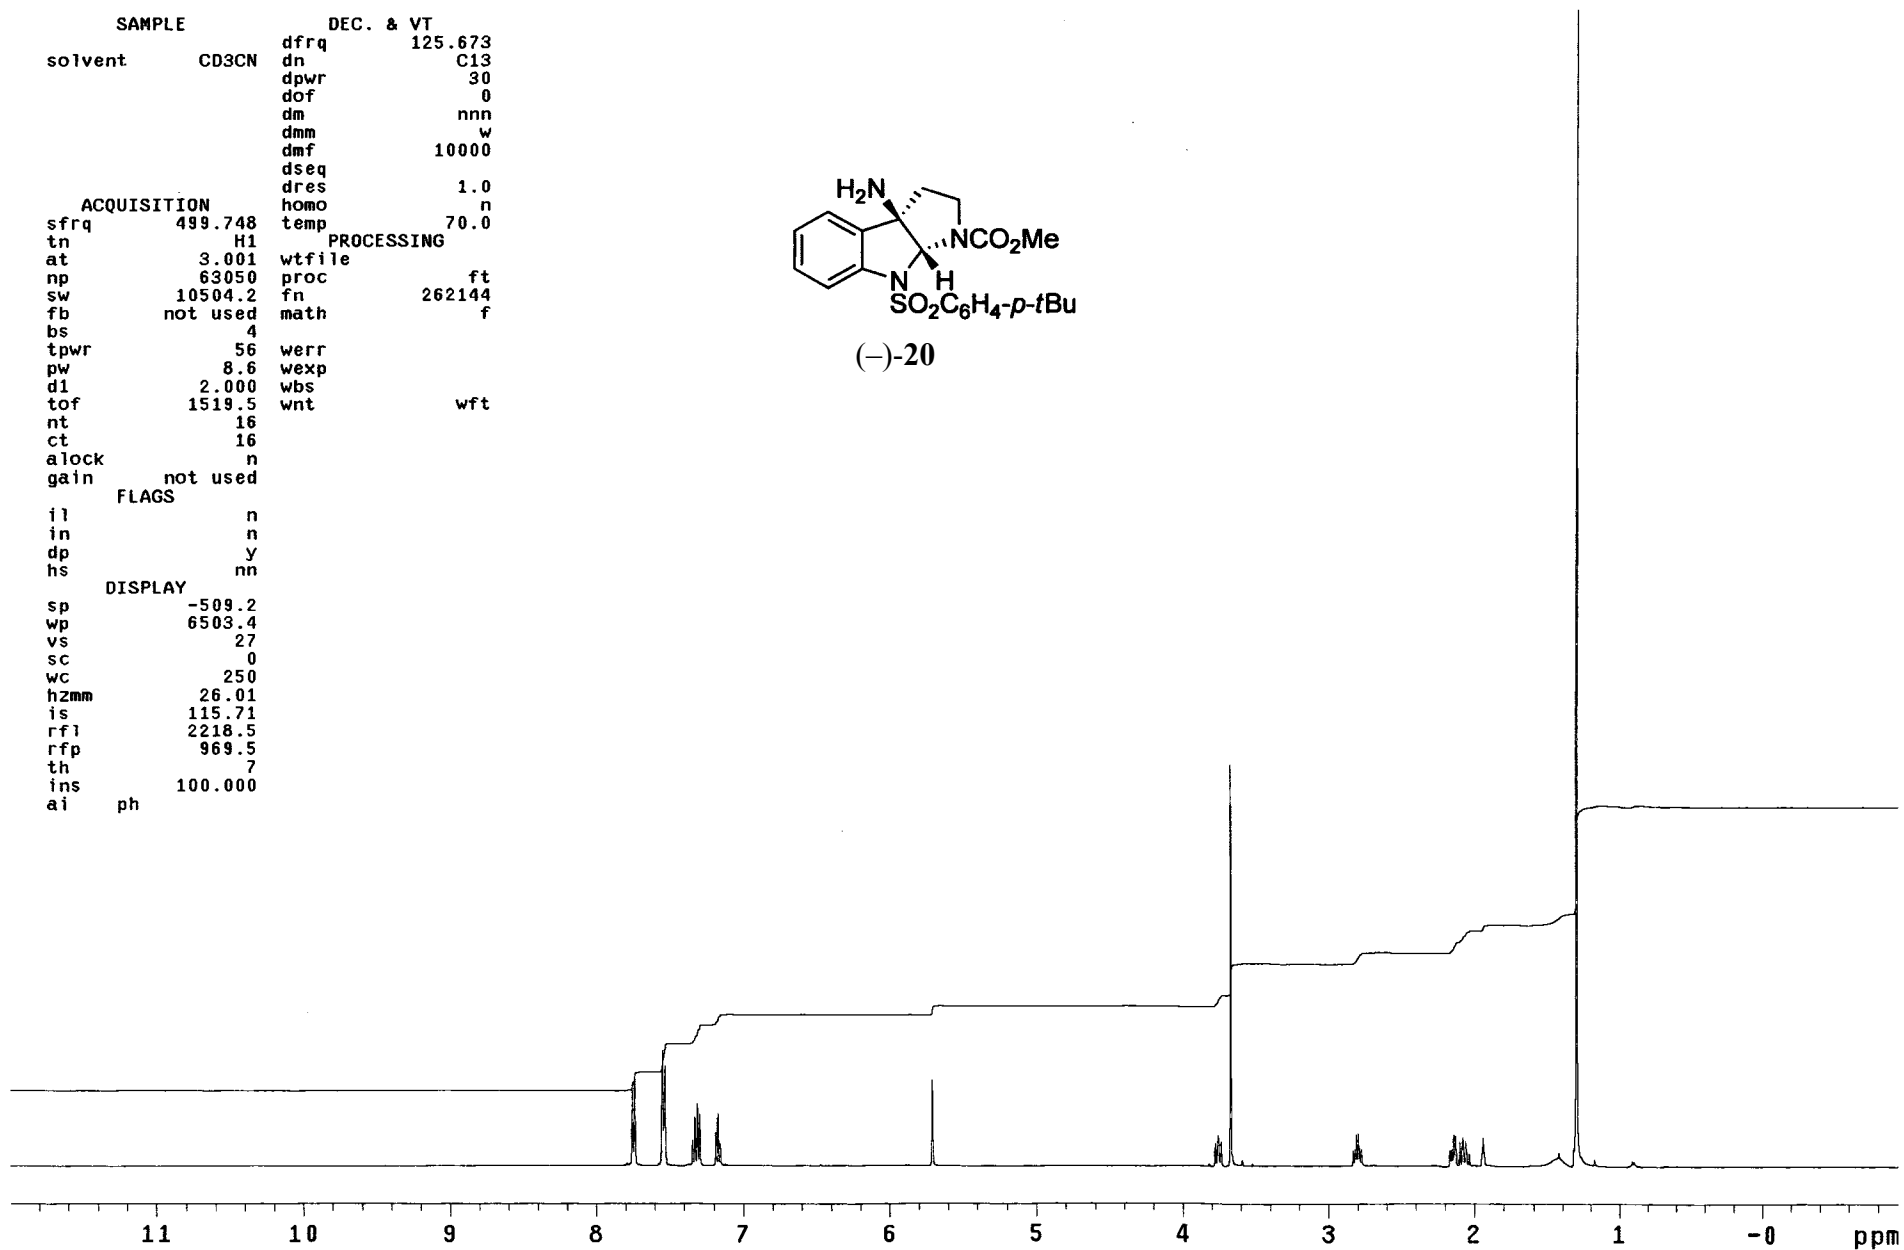

```
SAMPLE          DEC. & VT
solvent          CD3CN  dfrq      500.232
                  dn        H1
                  dpwr      39
                  dof       -500.0
                  dm        y
                  dmm       w
                  dmf      10000
                  dseq
                  dres      1.0
                  homo     n
                  temp     70.0

ACQUISITION
sfrq      125.795
tn         C13
at         1.736
np        131010
sw        37735.8
fb        not used
bs         64
ss         1
tpwr       58
pw         6.9
d1         0.763
tof        631.4
nt        25000
ct        16896
alock     n
gain     not used

PROCESSING
lb         0.30
wtfile
proc       ft
fn        131072
math       f

FLAGS
il         n
in         n
dp         y
hs         nn

DISPLAY
sp        -2538.4
wp        30188.2
vs         629
sc         0
wc         250
hzmm      120.75
is        500.00
rf1       21011.6
rfp       14929.1
th         20
ins       1.000
ai        ph
```

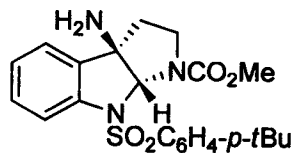

(-)-20

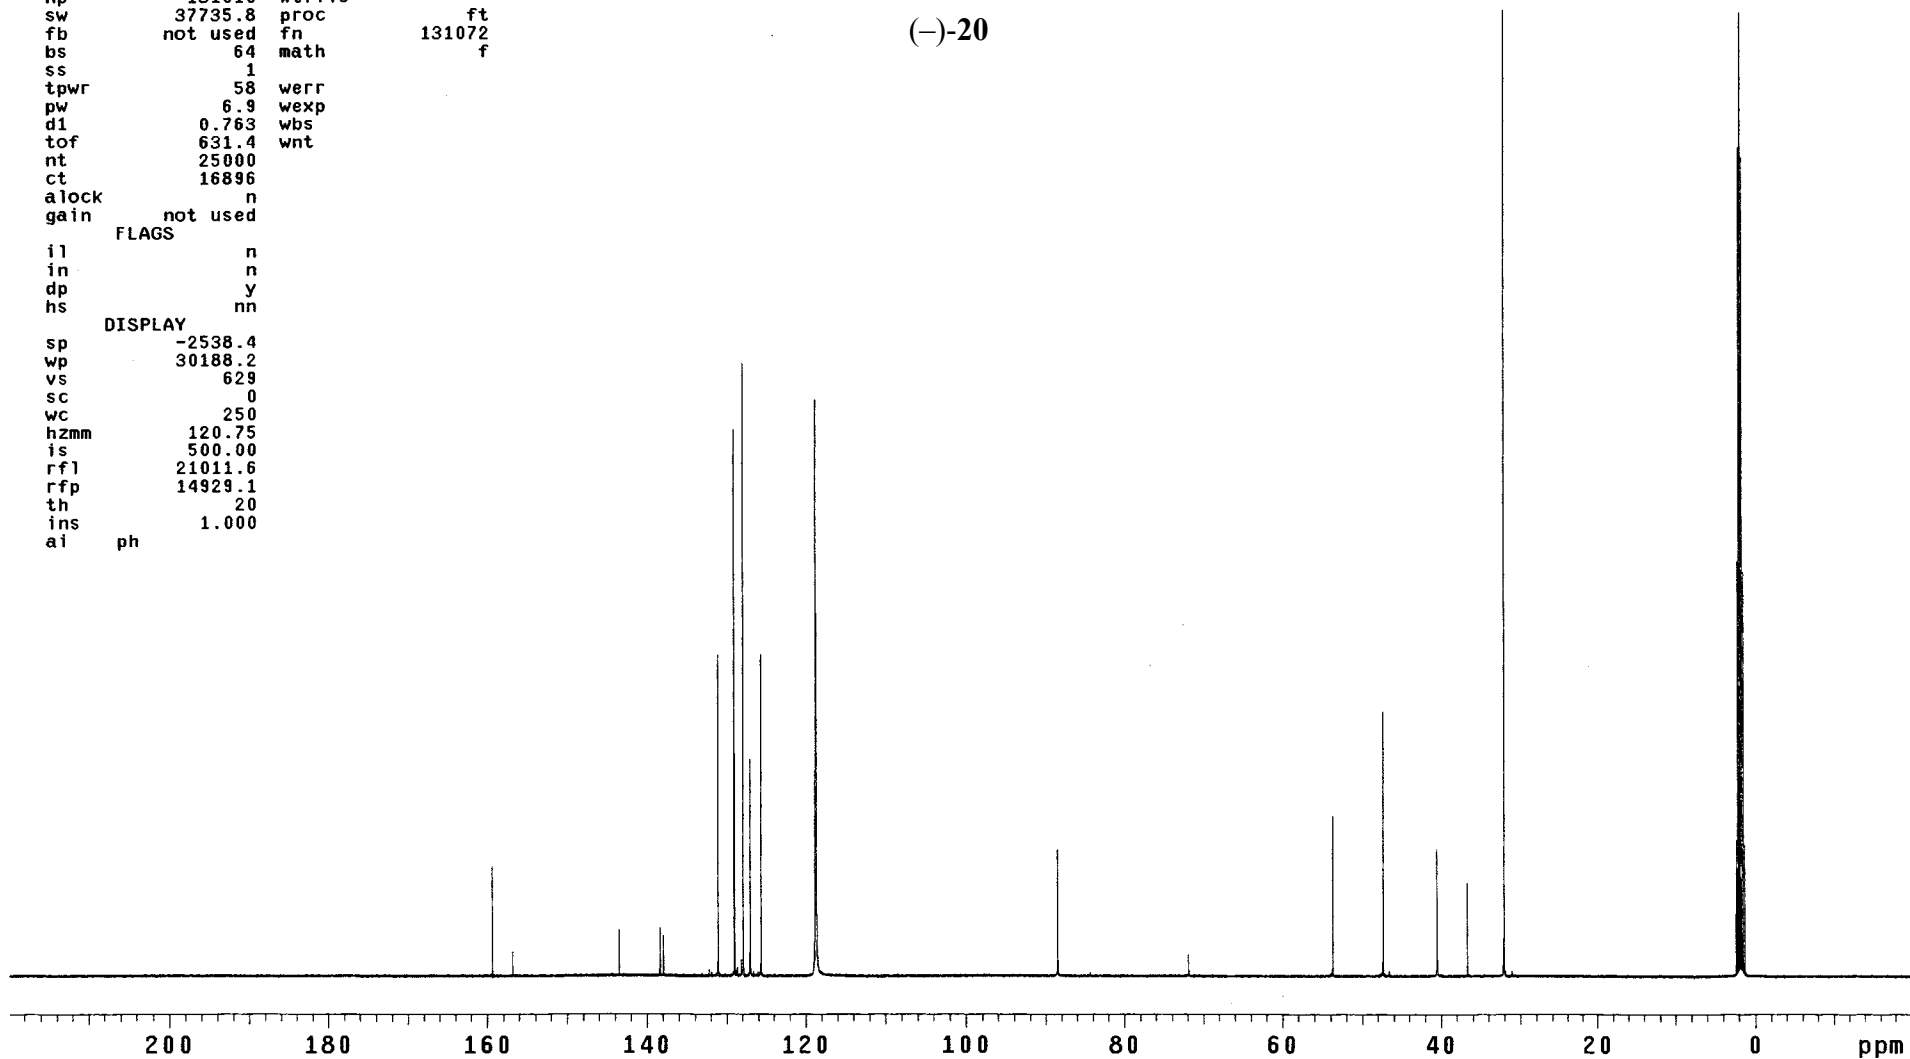

```
SAMPLE          DEC. & VT
solvent  Benzene  dfrq      125.672
                        dn       C13
                        dpwr     30
                        dof      0
                        dm       nnn
                        dmm      w
ACQUISITION      dmf      10000
sfrq      499.746  dseq
tn         H1      dres      1.0
at         3.001   homo      n
np         63050
sw         10504.2 wtfile
fb         not used proc
bs         4       fn       262144
tpwr      56      math
pw         8.6    werr
d1         2.000 wexp
tof        1519.5 wbs
nt         16     wnt
ct         16
alock      n
gain       not used
FLAGS
il         n
in         n
dp         y
hs         nn
DISPLAY
sp         -501.3
wp         6501.7
vs         17
sc         0
wc         250
hzmm      26.01
is         141.88
rf1       4794.8
rfp       3578.2
th         7
ins       100.000
ai        ph
```

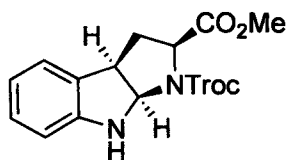

(+)-S4

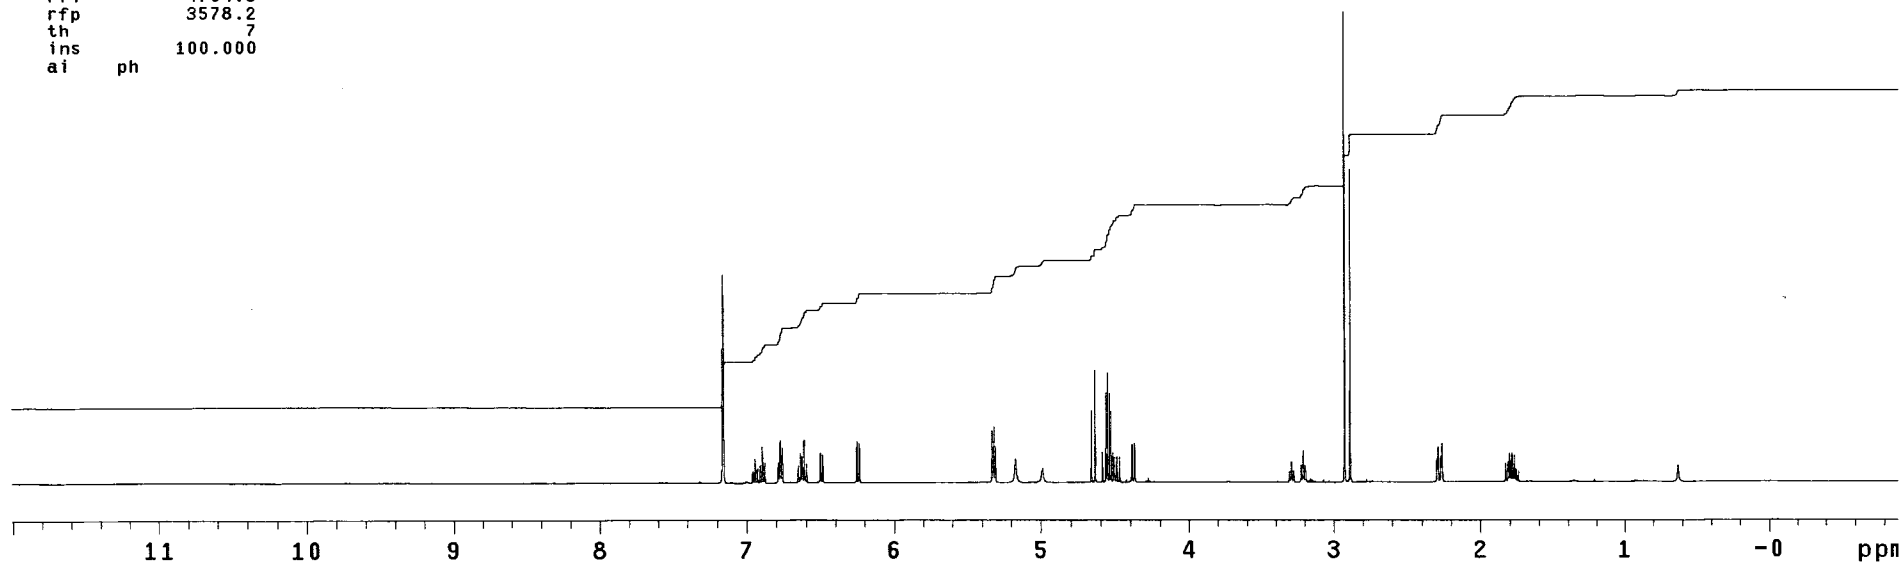

```
SAMPLE          DEC. & VT
solvent  Benzene  dfrq      500.229
                   dn        H1
                   dpwr      39
                   dof      -500.0
                   dm        y
                   dmm       w
                   dmf      10000
ACQUISITION
sfrq      125.795  dseq
tn        C13     dres      1.0
at        1.736   homo      n
np        131010  PROCESSING
sw        37735.8 lb        0.30
fb        not used wtfile
bs        32     proc      ft
ss        1      fn       131072
tpwr     58     math     f
pw        6.9
d1        0.763  werr
tof       631.4  wexp
nt        10000 wbs
ct        6496  wnt
alock     n
gain      not used
FLAGS
il        n
in        n
dp        y
hs        nn
DISPLAY
sp        -2528.7
wp        30199.7
vs        853
sc        0
wc        250
hzmm     120.80
is        500.00
rf1      22374.0
rfp      16149.2
th        20
ins      1.000
ai        ph
```

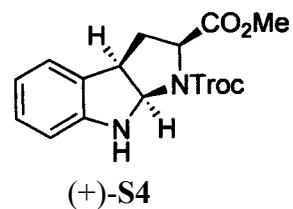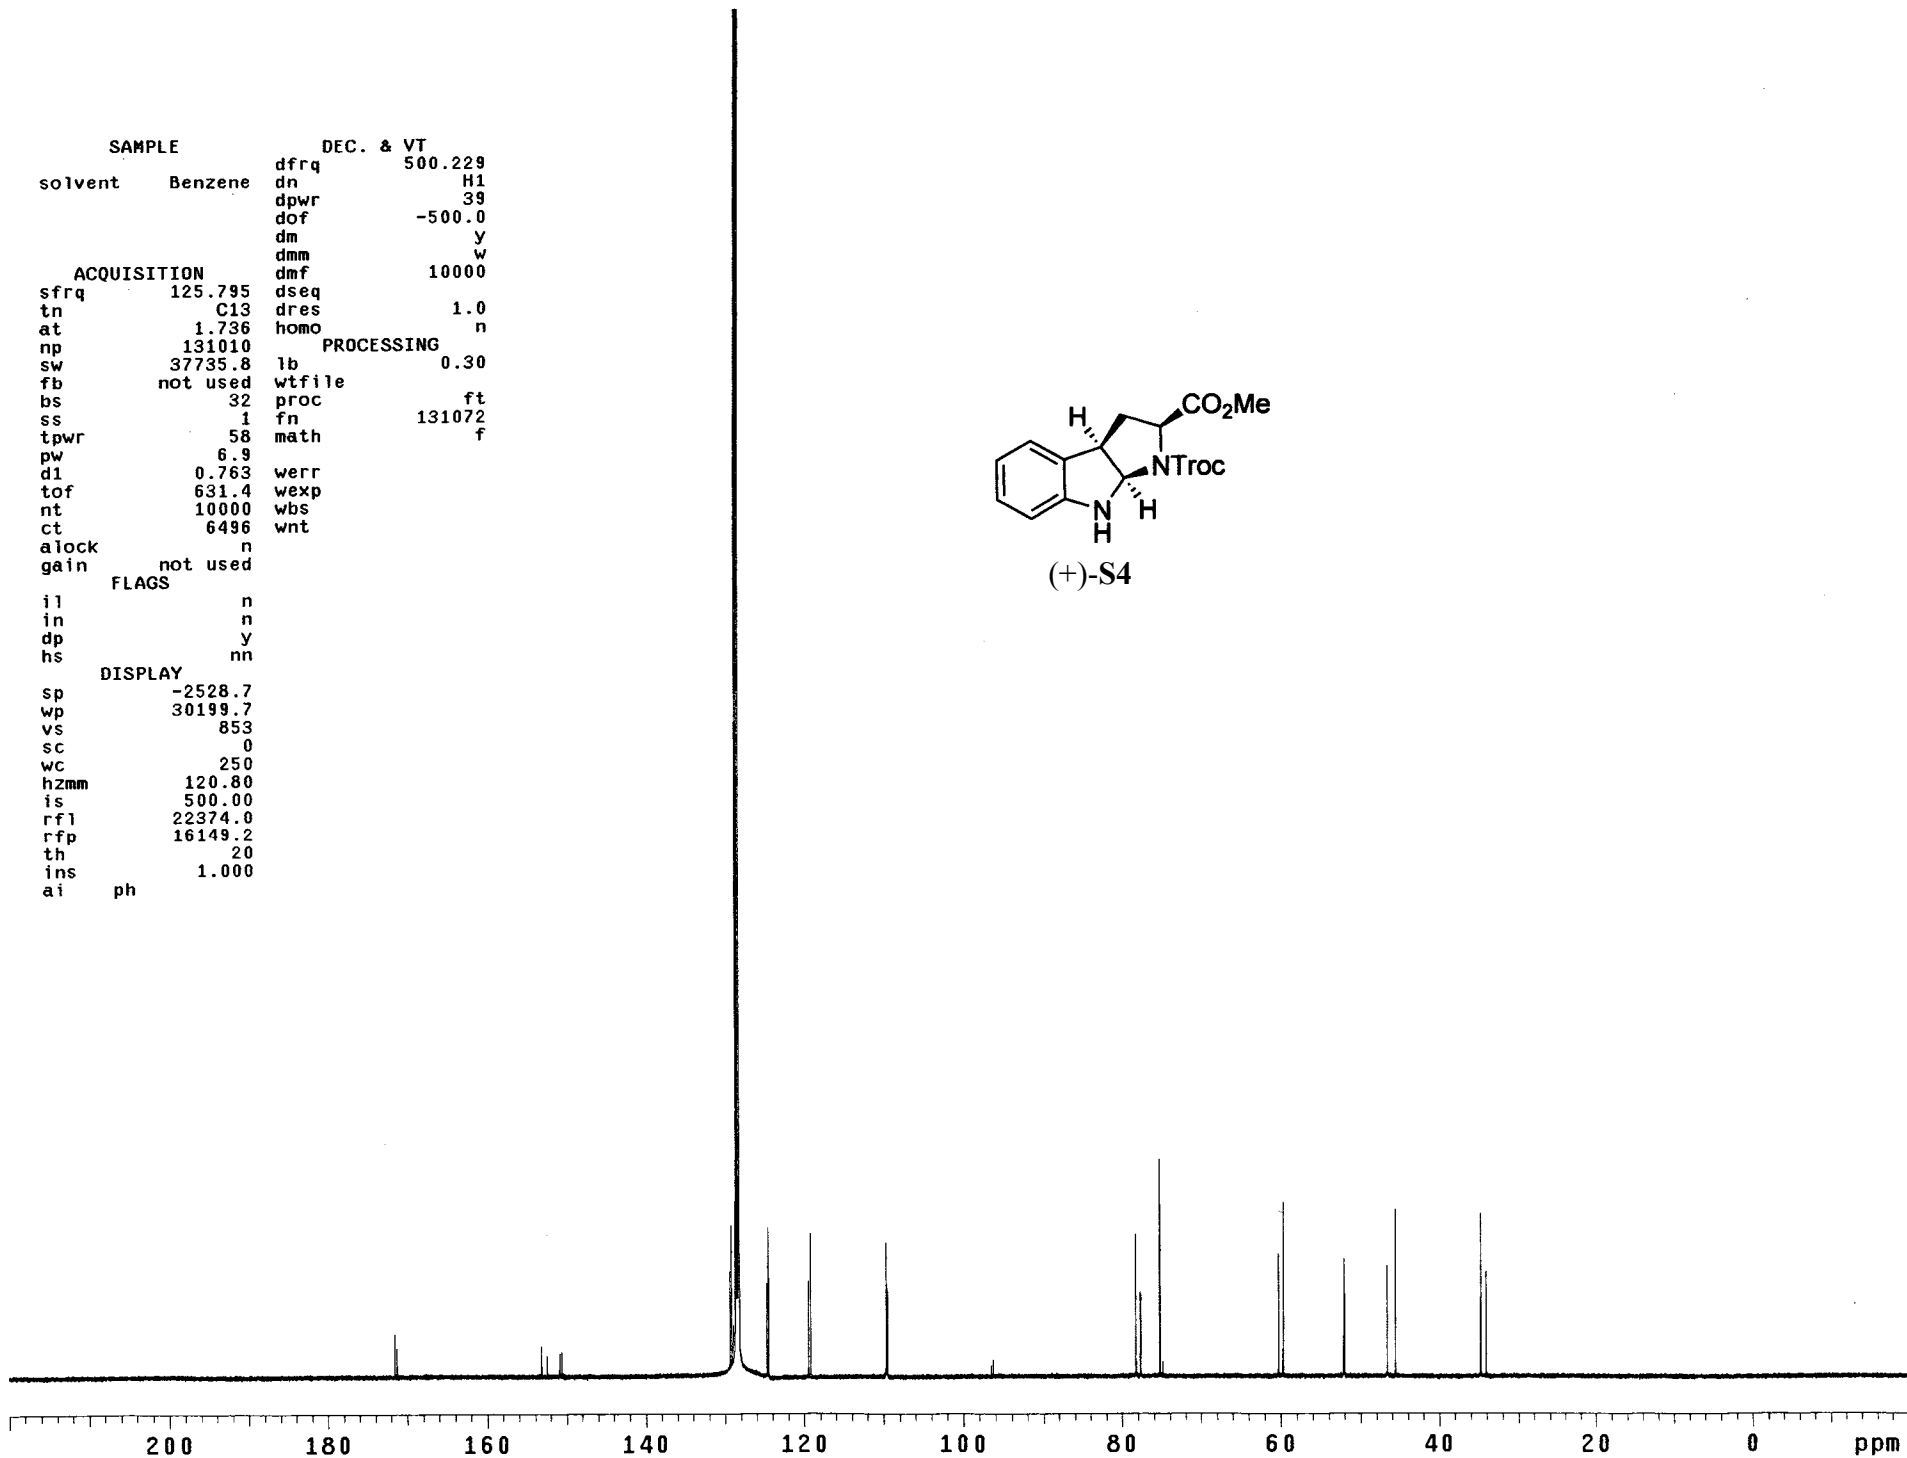

|             |          |            |         |
|-------------|----------|------------|---------|
| SAMPLE      |          | DEC. & VT  |         |
| solvent     | CD3CN    | dfrq       | 125.673 |
|             |          | dn         | C13     |
|             |          | dpwr       | 30      |
|             |          | dof        | 0       |
|             |          | dm         | nnn     |
|             |          | dmm        | w       |
|             |          | dmf        | 10000   |
|             |          | dseq       |         |
|             |          | dres       | 1.0     |
|             |          | homo       | n       |
|             |          | temp       | 70.0    |
| ACQUISITION |          | PROCESSING |         |
| sfrq        | 499.748  | wtfile     | ft      |
| tn          | H1       | proc       | 262144  |
| at          | 3.001    | fn         | f       |
| np          | 63050    | math       |         |
| sw          | 10504.2  |            |         |
| fb          | not used |            |         |
| bs          | 4        |            |         |
| tpwr        | 56       | werr       |         |
| pw          | 8.6      | wexp       |         |
| d1          | 2.000    | wbs        |         |
| tof         | 1519.5   | wnt        | wft     |
| nt          | 32       |            |         |
| ct          | 12       |            |         |
| alock       | n        |            |         |
| gain        | not used |            |         |
| FLAGS       |          |            |         |
| il          | n        |            |         |
| in          | n        |            |         |
| dp          | y        |            |         |
| hs          | nn       |            |         |
| DISPLAY     |          |            |         |
| sp          | -510.2   |            |         |
| wp          | 6497.4   |            |         |
| vs          | 63       |            |         |
| sc          | 0        |            |         |
| wc          | 250      |            |         |
| hzmm        | 25.99    |            |         |
| is          | 206.92   |            |         |
| rfl         | 2217.2   |            |         |
| rfp         | 969.5    |            |         |
| th          | 7        |            |         |
| ins         | 1.000    |            |         |
| ai          | ph       |            |         |

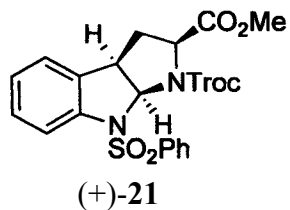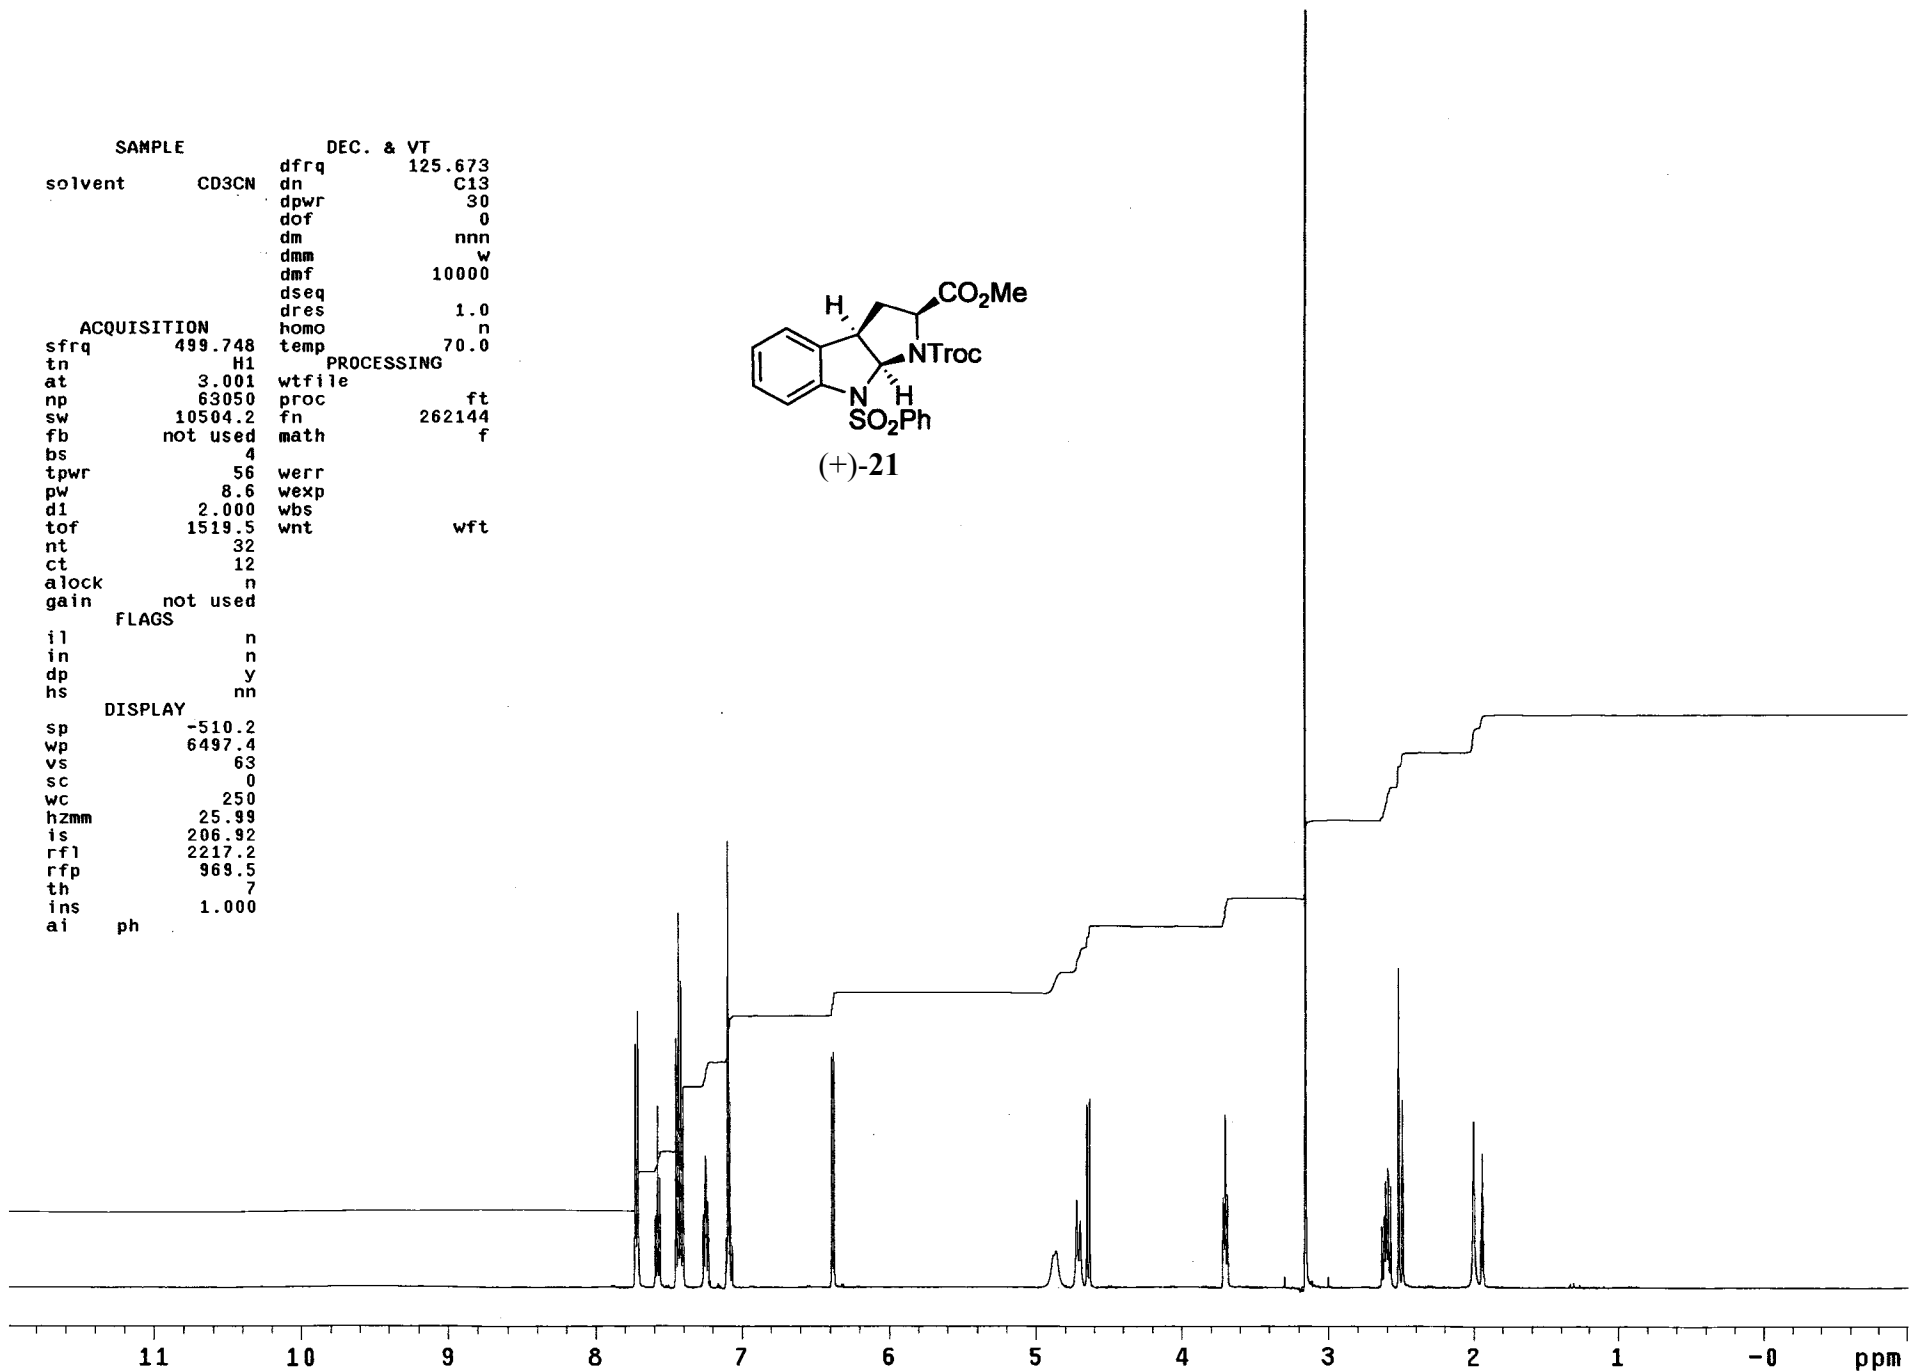

|             |          |            |         |
|-------------|----------|------------|---------|
| SAMPLE      |          | DEC. & VT  |         |
| solvent     | CD3CN    | dfrq       | 500.232 |
|             |          | dn         | H1      |
|             |          | dpwr       | 38      |
|             |          | dof        | -500.0  |
|             |          | dm         | y       |
|             |          | dmm        | w       |
|             |          | dmf        | 10700   |
|             |          | dseq       |         |
|             |          | dres       | 1.0     |
|             |          | homo       | n       |
|             |          | temp       | 70.0    |
| ACQUISITION |          | PROCESSING |         |
| sfrq        | 125.795  | lb         | 0.30    |
| tn          | C13      | wtfile     |         |
| at          | 1.736    | proc       | ft      |
| np          | 131010   | fn         | 131072  |
| sw          | 37735.8  | math       | f       |
| fb          | not used |            |         |
| bs          | 16       |            |         |
| ss          | 1        |            |         |
| tpwr        | 59       | werr       |         |
| pw          | 6.9      | wexp       |         |
| d1          | 0.763    | wbs        |         |
| tof         | 631.4    | wnt        |         |
| nt          | 10000    |            |         |
| ct          | 2384     |            |         |
| alock       | n        |            |         |
| gain        | not used |            |         |
| FLAGS       |          |            |         |
| il          | n        |            |         |
| in          | n        |            |         |
| dp          | y        |            |         |
| hs          | nn       |            |         |
| DISPLAY     |          |            |         |
| sp          | -2543.9  |            |         |
| wp          | 30229.1  |            |         |
| vs          | 232      |            |         |
| sc          | 0        |            |         |
| wc          | 250      |            |         |
| hzmm        | 120.92   |            |         |
| is          | 500.00   |            |         |
| rfl         | 21012.0  |            |         |
| rfp         | 14876.8  |            |         |
| th          | 2        |            |         |
| ins         | 1.000    |            |         |
| ai          | ph       |            |         |

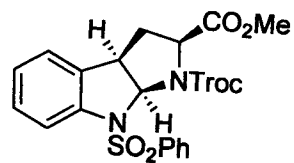

(+)-21

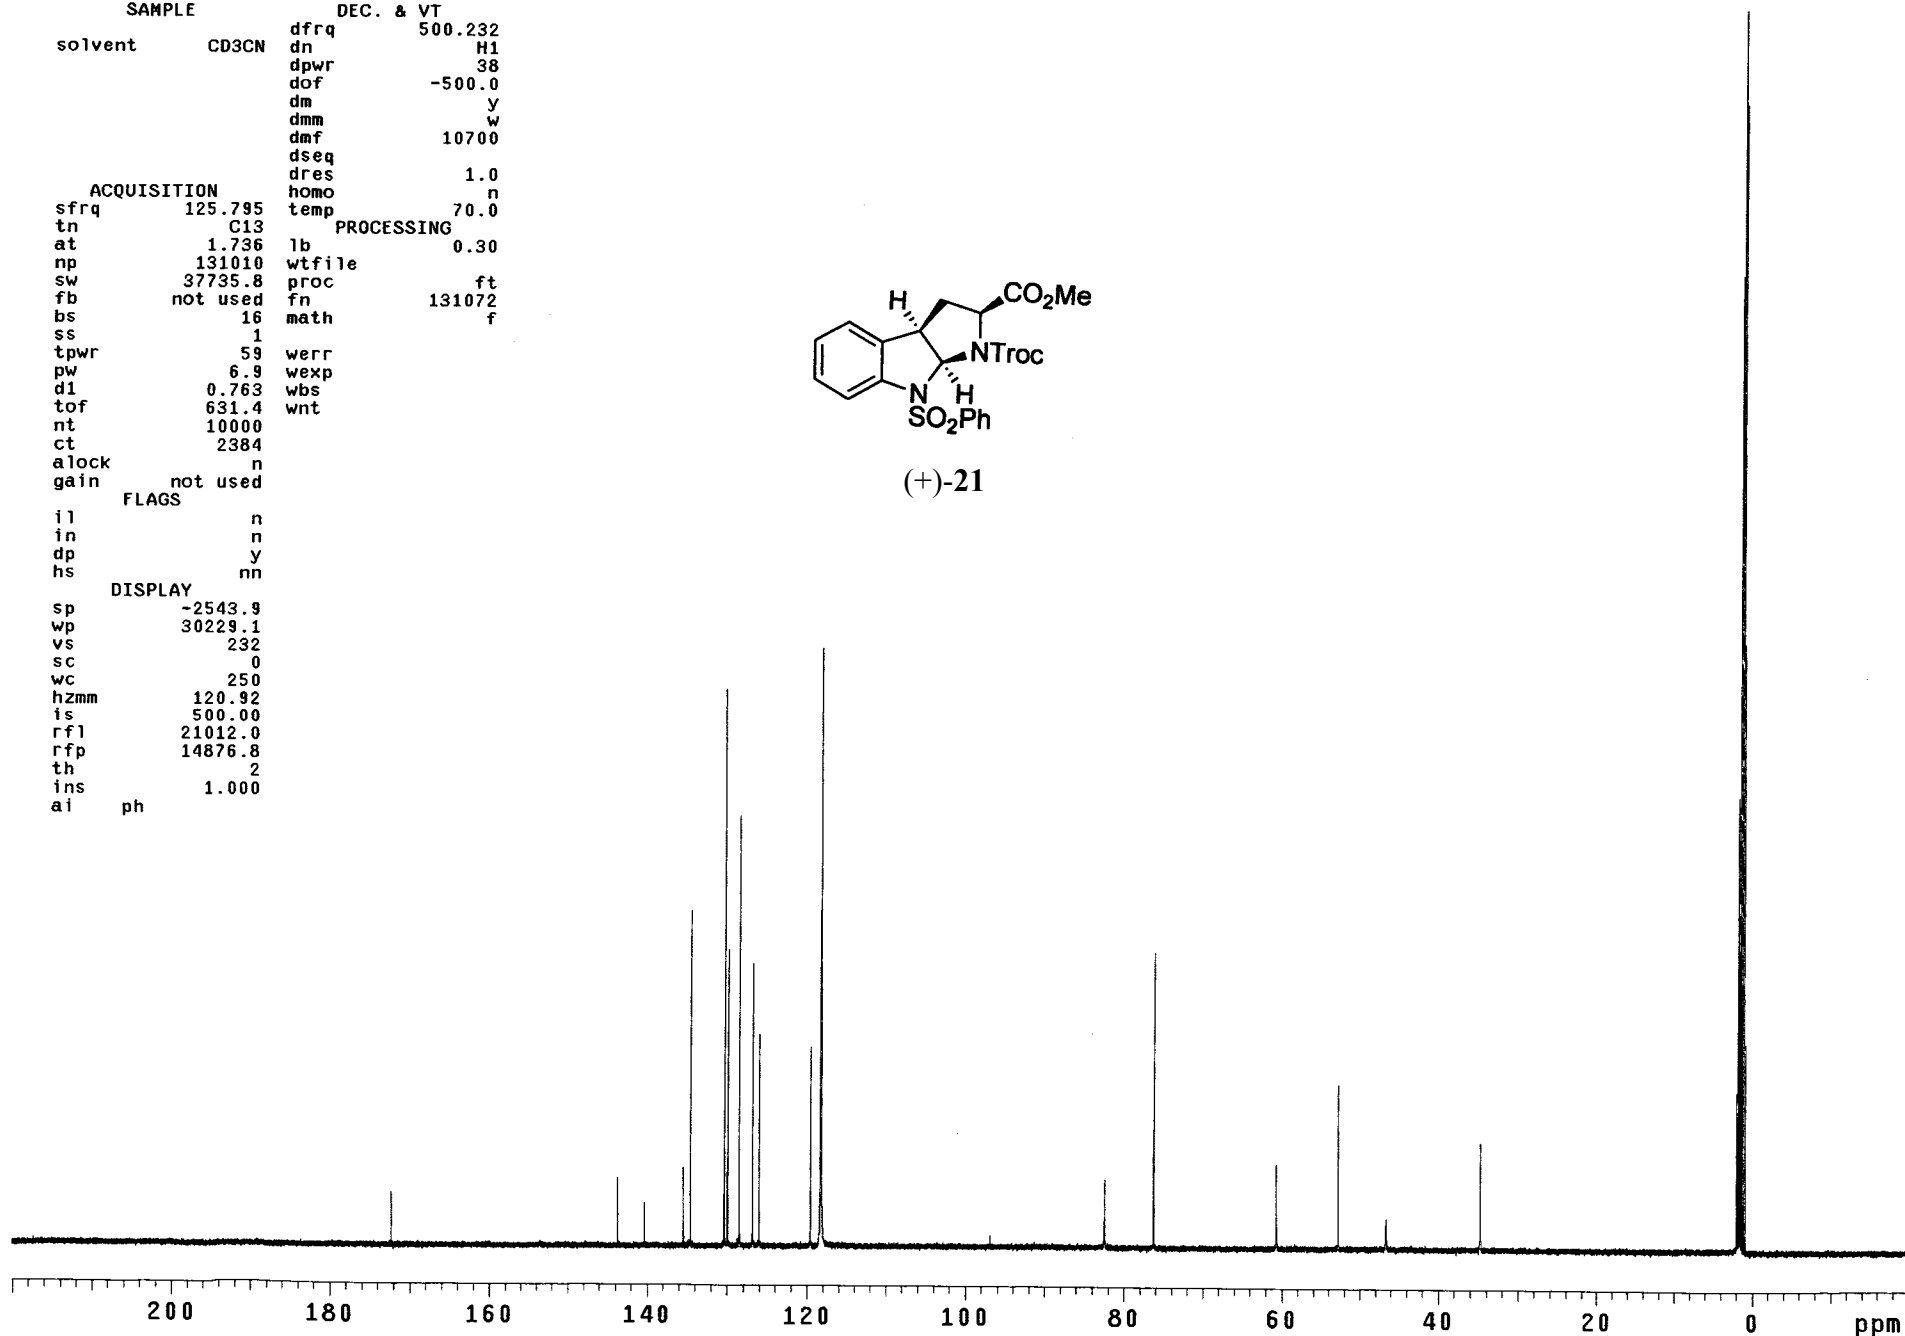

|             |          |            |         |
|-------------|----------|------------|---------|
| SAMPLE      |          | DEC. & VT  |         |
| solvent     | CD3CN    | dfrq       | 125.673 |
|             |          | dn         | C13     |
|             |          | dpwr       | 30      |
|             |          | dof        | 0       |
|             |          | dm         | nnn     |
|             |          | dmm        | w       |
|             |          | dmf        | 10000   |
|             |          | dseq       |         |
|             |          | dres       | 1.0     |
|             |          | homo       | n       |
|             |          | temp       | 70.0    |
| ACQUISITION |          | PROCESSING |         |
| sfrq        | 499.748  | wtfile     | ft      |
| tn          | H1       | proc       |         |
| at          | 3.001    | fn         | 262144  |
| np          | 63050    | math       | f       |
| sw          | 10504.2  |            |         |
| fb          | not used |            |         |
| bs          | 4        |            |         |
| tpwr        | 56       | werr       |         |
| pw          | 8.6      | wexp       |         |
| d1          | 2.000    | wbs        |         |
| tof         | 1519.5   | wnt        | wft     |
| nt          | 16       |            |         |
| ct          | 16       |            |         |
| alock       | n        |            |         |
| gain        | not used |            |         |
| FLAGS       |          |            |         |
| il          | n        |            |         |
| in          | n        |            |         |
| dp          | y        |            |         |
| hs          | nn       |            |         |
| DISPLAY     |          |            |         |
| sp          | -503.1   |            |         |
| wp          | 6505.7   |            |         |
| vs          | 55       |            |         |
| sc          | 0        |            |         |
| wc          | 250      |            |         |
| hzmm        | 26.02    |            |         |
| is          | 160.27   |            |         |
| rfl         | 2218.2   |            |         |
| rfp         | 969.5    |            |         |
| th          | 7        |            |         |
| ins         | 100.000  |            |         |
| ai          | ph       |            |         |

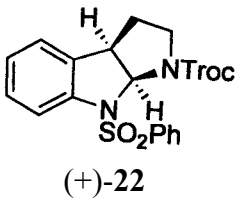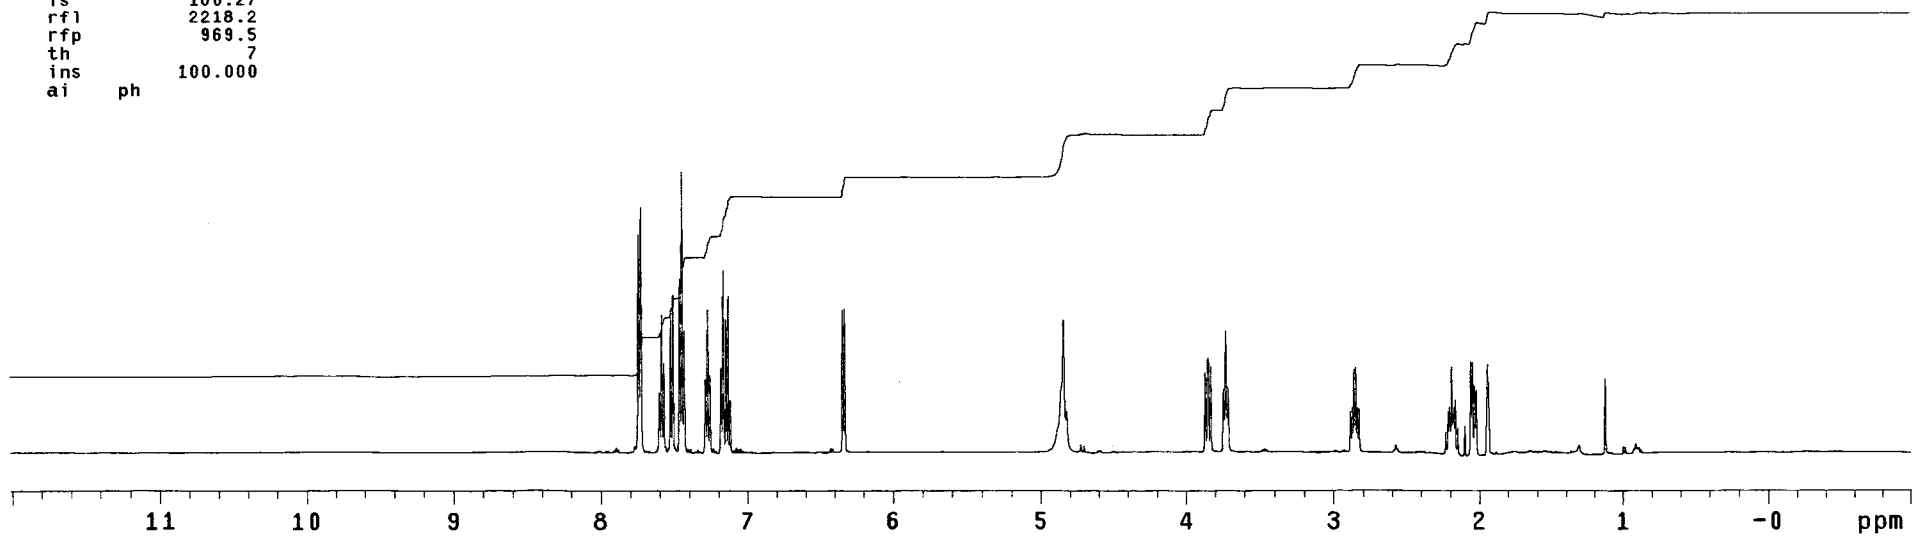



```

SAMPLE          DEC. & VT
solvent         CD3CN   dfrq      500.232
                 dn       H1
                 dpwr     38
                 dof     -500.0
                 dm       y
                 dmm      w
                 dmf     10700
                 dseq
                 dres     1.0
                 homo    n
                 temp    70.0
ACQUISITION
sfrq           125.795
tn             C13
at             1.736   lb       0.30
np            131010  wtfile
sw            37735.8  proc      ft
fb            not used  fn       131072
bs             16     math      f
ss             1
tpwr           59     werr
pw             6.9    wexp
d1             0.763  wbs
tof           631.4  wnt
nt            20000
ct            3264
alock         n
gain          not used
FLAGS
il            n
in            n
dp            y
hs            nn
DISPLAY
sp           -2551.1
wp           30229.1
vs           121
sc           0
wc           250
h2mm        120.92
is           500.00
rf1         21012.8
rfp         14929.1
th           20
ins         1.000
ai          ph
    
```

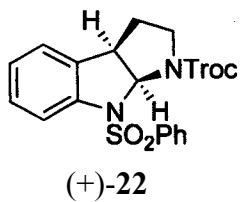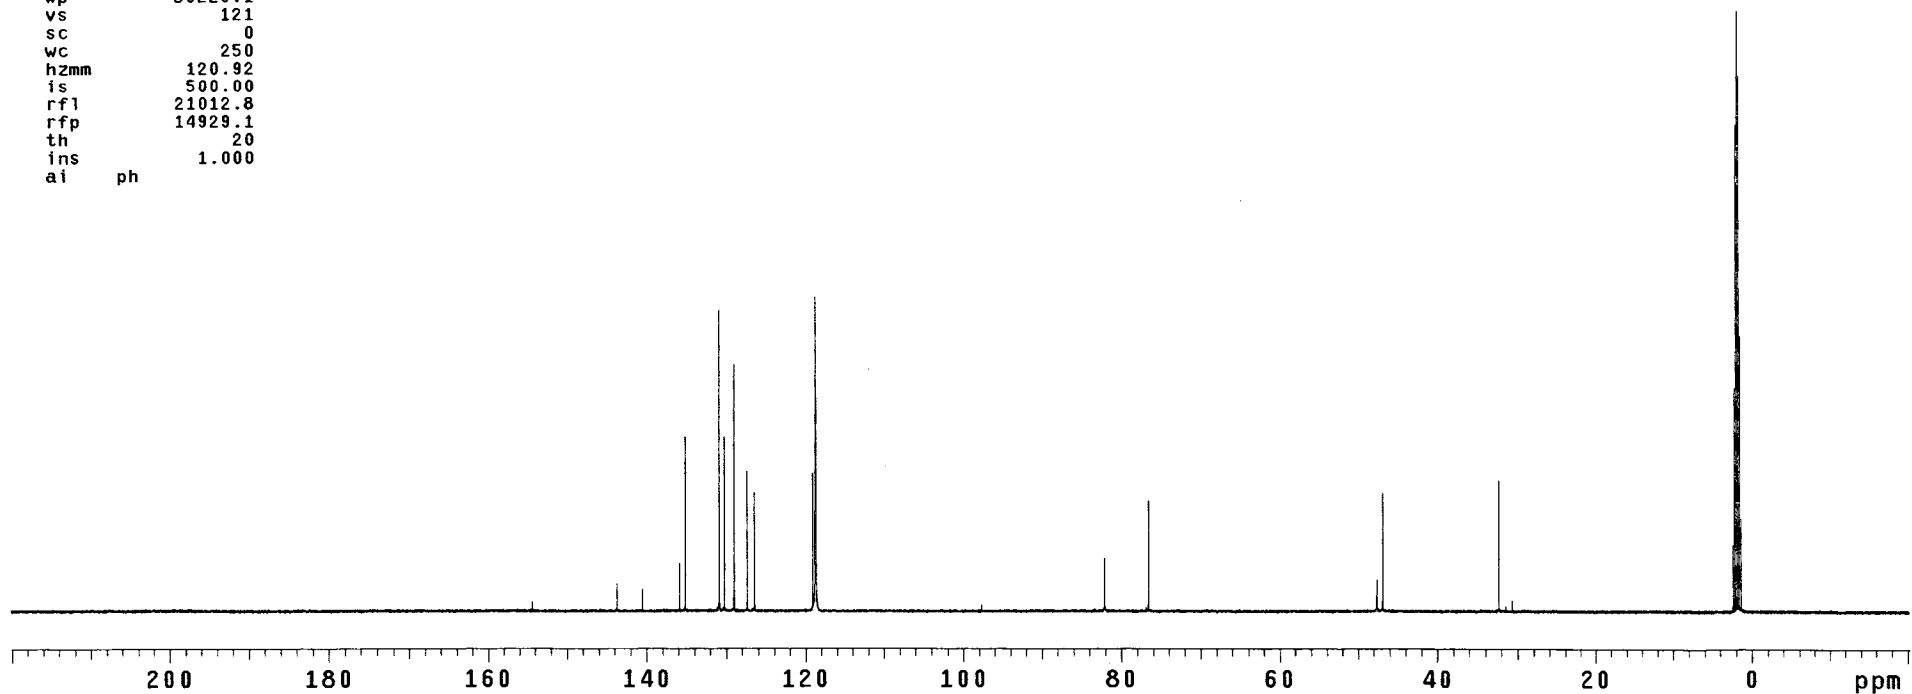

```
SAMPLE          DEC. & VT
solvent         CD3CN      dfrq      125.673
                dn         C13
                dpwr      30
                dof       0
                dmm       nnn
                dmf       10000
                dseq      1.0
                dres      n
                homo      temp 70.0
ACQUISITION
sfrq           499.748   H1
tn             3.001    wtfile
at             63050    proc
np             10504.2  fn
sw             not used math
fb             4
bs             56      werr
tpwr           8.6     wexp
pw             2.000   wbs
d1             1519.5  wnt
tof            16
ct             16
alock         n
gain          not used
FLAGS
i)            n
in            n
dp            y
hs            nn
DISPLAY
sp            -518.1
wp            6494.3
vs            98
sc            0
wc            250
hzmm         25.98
is            186.52
rfl          2218.3
rfp          969.5
th            7
ins          100.000
ai           ph
```

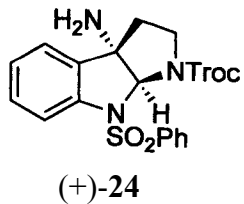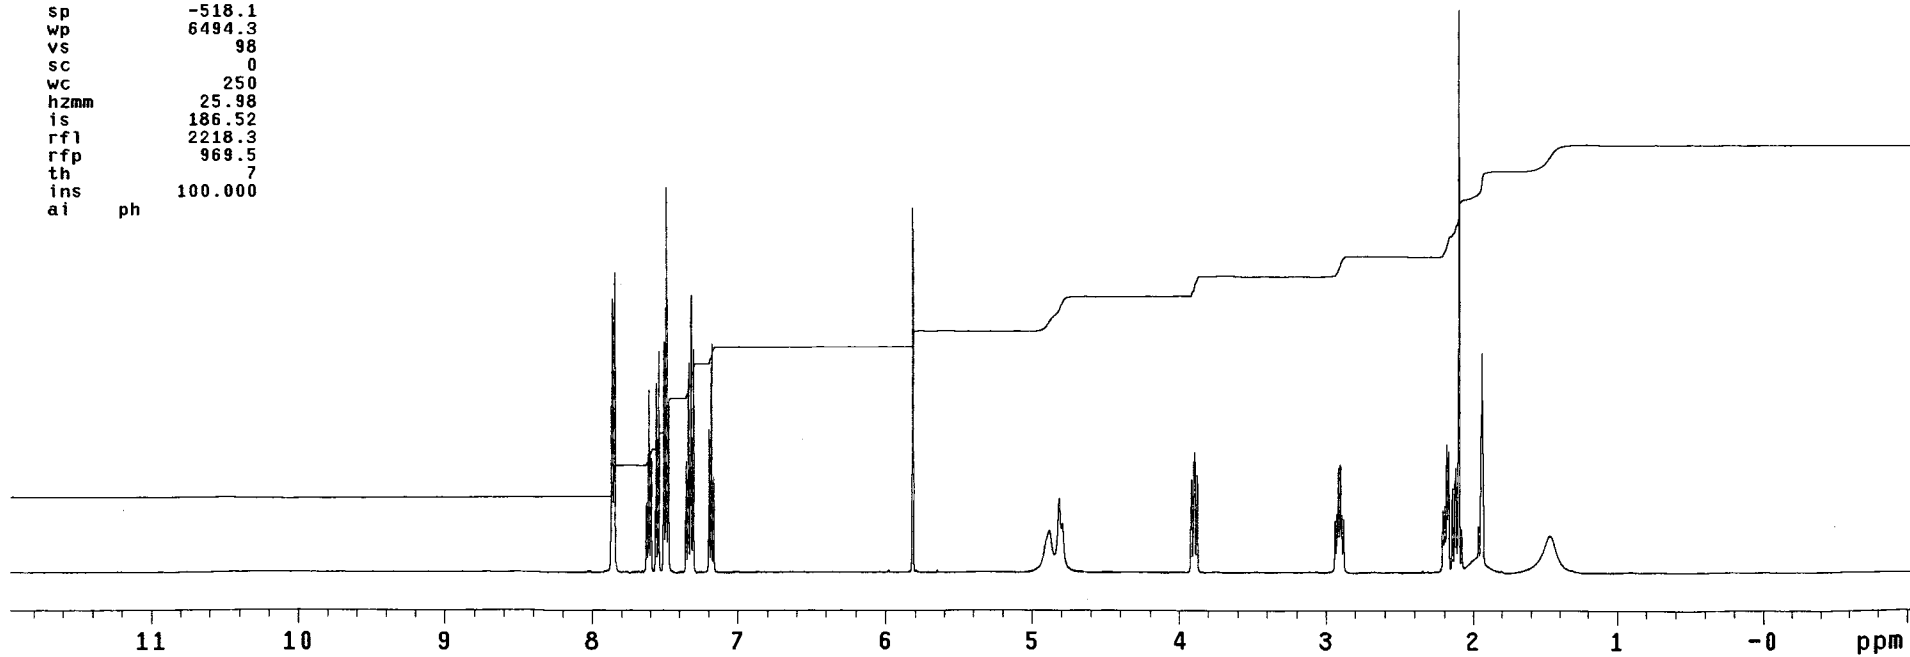

```
SAMPLE          DEC. & VT
solvent         CD3CN   dfrq      500.232
                dn       H1
                dpwr      39
                dof      -500.0
                dm        y
                dmm       w
                dmf       10000
ACQUISITION
sfrq           125.795  dseq
tn             C13      dres      1.0
at             1.736    homo       n
np             131010   temp      70.0
sw             37735.8
fb             not used
bs             64      lb
ss             1       wtfile
tpwr           58      proc       ft
pw             6.9     fn         131072
d1             0.763   math       f
tof            631.4   werr
nt             20000   wexp
ct             19904   wbs
alock          n       wnt
gain           not used
                FLAGS
il             n
in             n
dp             y
hs             nn
DISPLAY
sp            -2556.0
wp            30230.3
vs            602
sc            0
wc            250
hzmm         120.92
is            500.00
rfl           21011.4
rfp           14930.9
th            20
ins           1.000
ai            ph
```

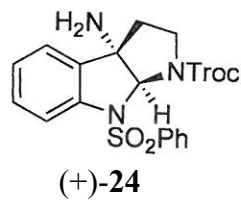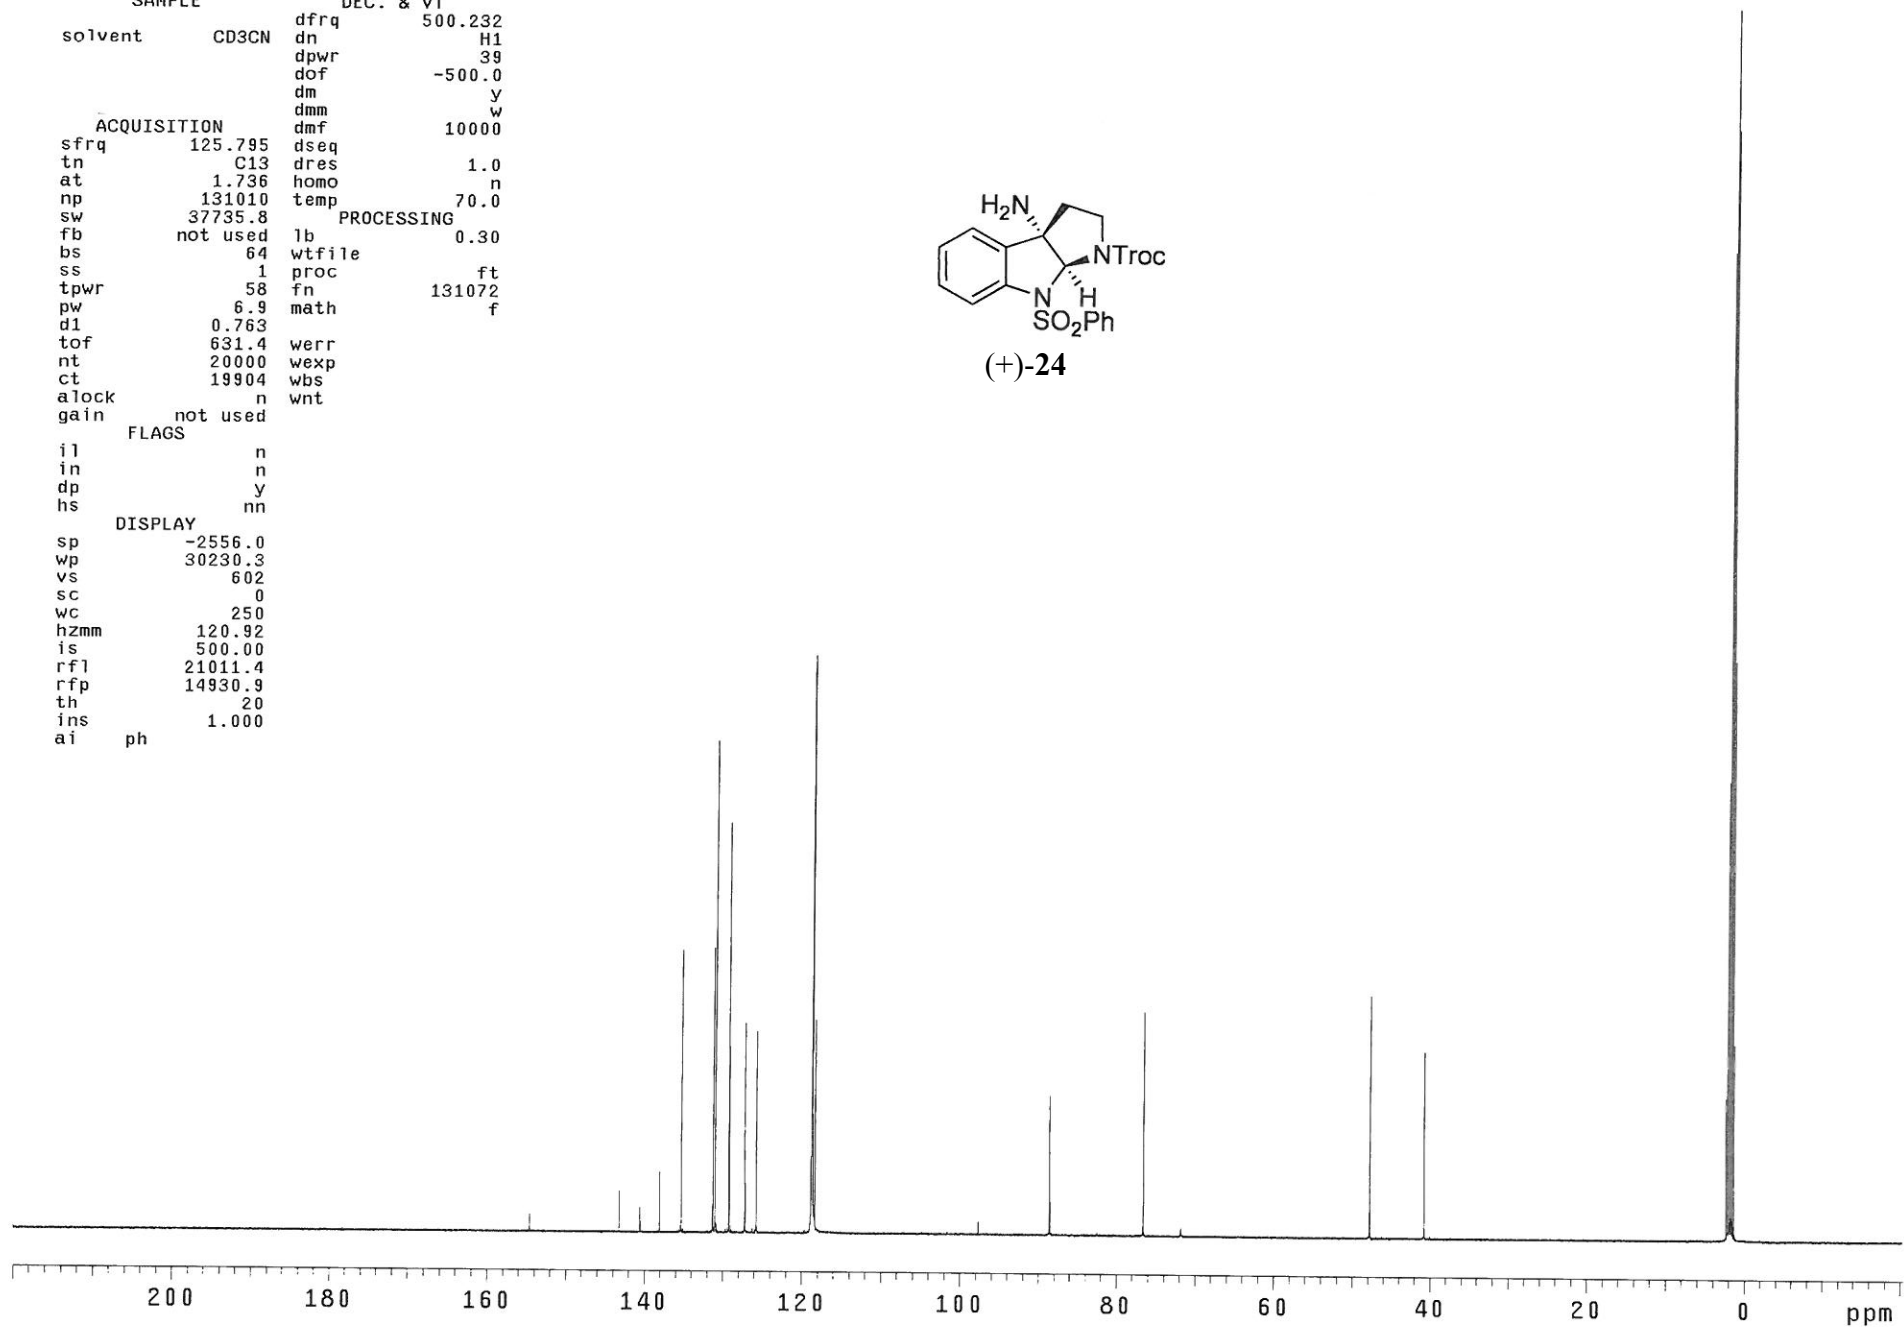

|             |          |            |         |
|-------------|----------|------------|---------|
| SAMPLE      |          | DEC. & VT  |         |
| solvent     | Benzene  | dfrq       | 125.672 |
|             |          | dn         | C13     |
|             |          | dpwr       | 30      |
|             |          | doF        | 0       |
|             |          | dm         | nnn     |
|             |          | dmm        | w       |
|             |          | dmf        | 10000   |
|             |          | dseq       |         |
|             |          | dres       | 1.0     |
|             |          | homo       | n       |
|             |          | temp       | 70.0    |
| ACQUISITION |          | PROCESSING |         |
| sfrq        | 499.746  | wtfile     |         |
| tn          | H1       | proc       | ft      |
| at          | 3.001    | fn         | 262144  |
| np          | 63050    | math       | f       |
| sw          | 10504.2  |            |         |
| fb          | not used |            |         |
| bs          | 4        |            |         |
| tpwr        | 56       | werr       |         |
| pw          | 8.6      | wexp       |         |
| d1          | 2.000    | wbs        |         |
| tof         | 1519.5   | wnt        | wft     |
| nt          | 16       |            |         |
| ct          | 16       |            |         |
| alock       | n        |            |         |
| gain        | not used |            |         |
| FLAGS       |          |            |         |
| il          | n        |            |         |
| in          | n        |            |         |
| dp          | y        |            |         |
| hs          | nn       |            |         |
| DISPLAY     |          |            |         |
| sp          | -502.9   |            |         |
| wp          | 6494.3   |            |         |
| vs          | 77       |            |         |
| sc          | 0        |            |         |
| wc          | 250      |            |         |
| hzmm        | 25.98    |            |         |
| is          | 167.69   |            |         |
| rfl         | 4793.6   |            |         |
| rfp         | 3578.2   |            |         |
| th          | 7        |            |         |
| ins         | 100.000  |            |         |
| ai          | ph       |            |         |

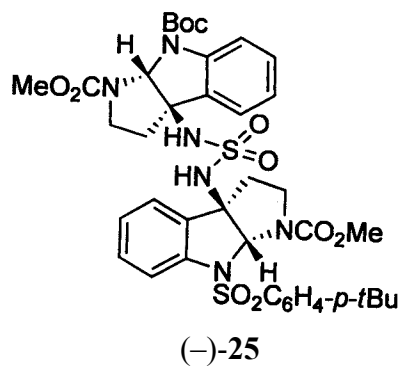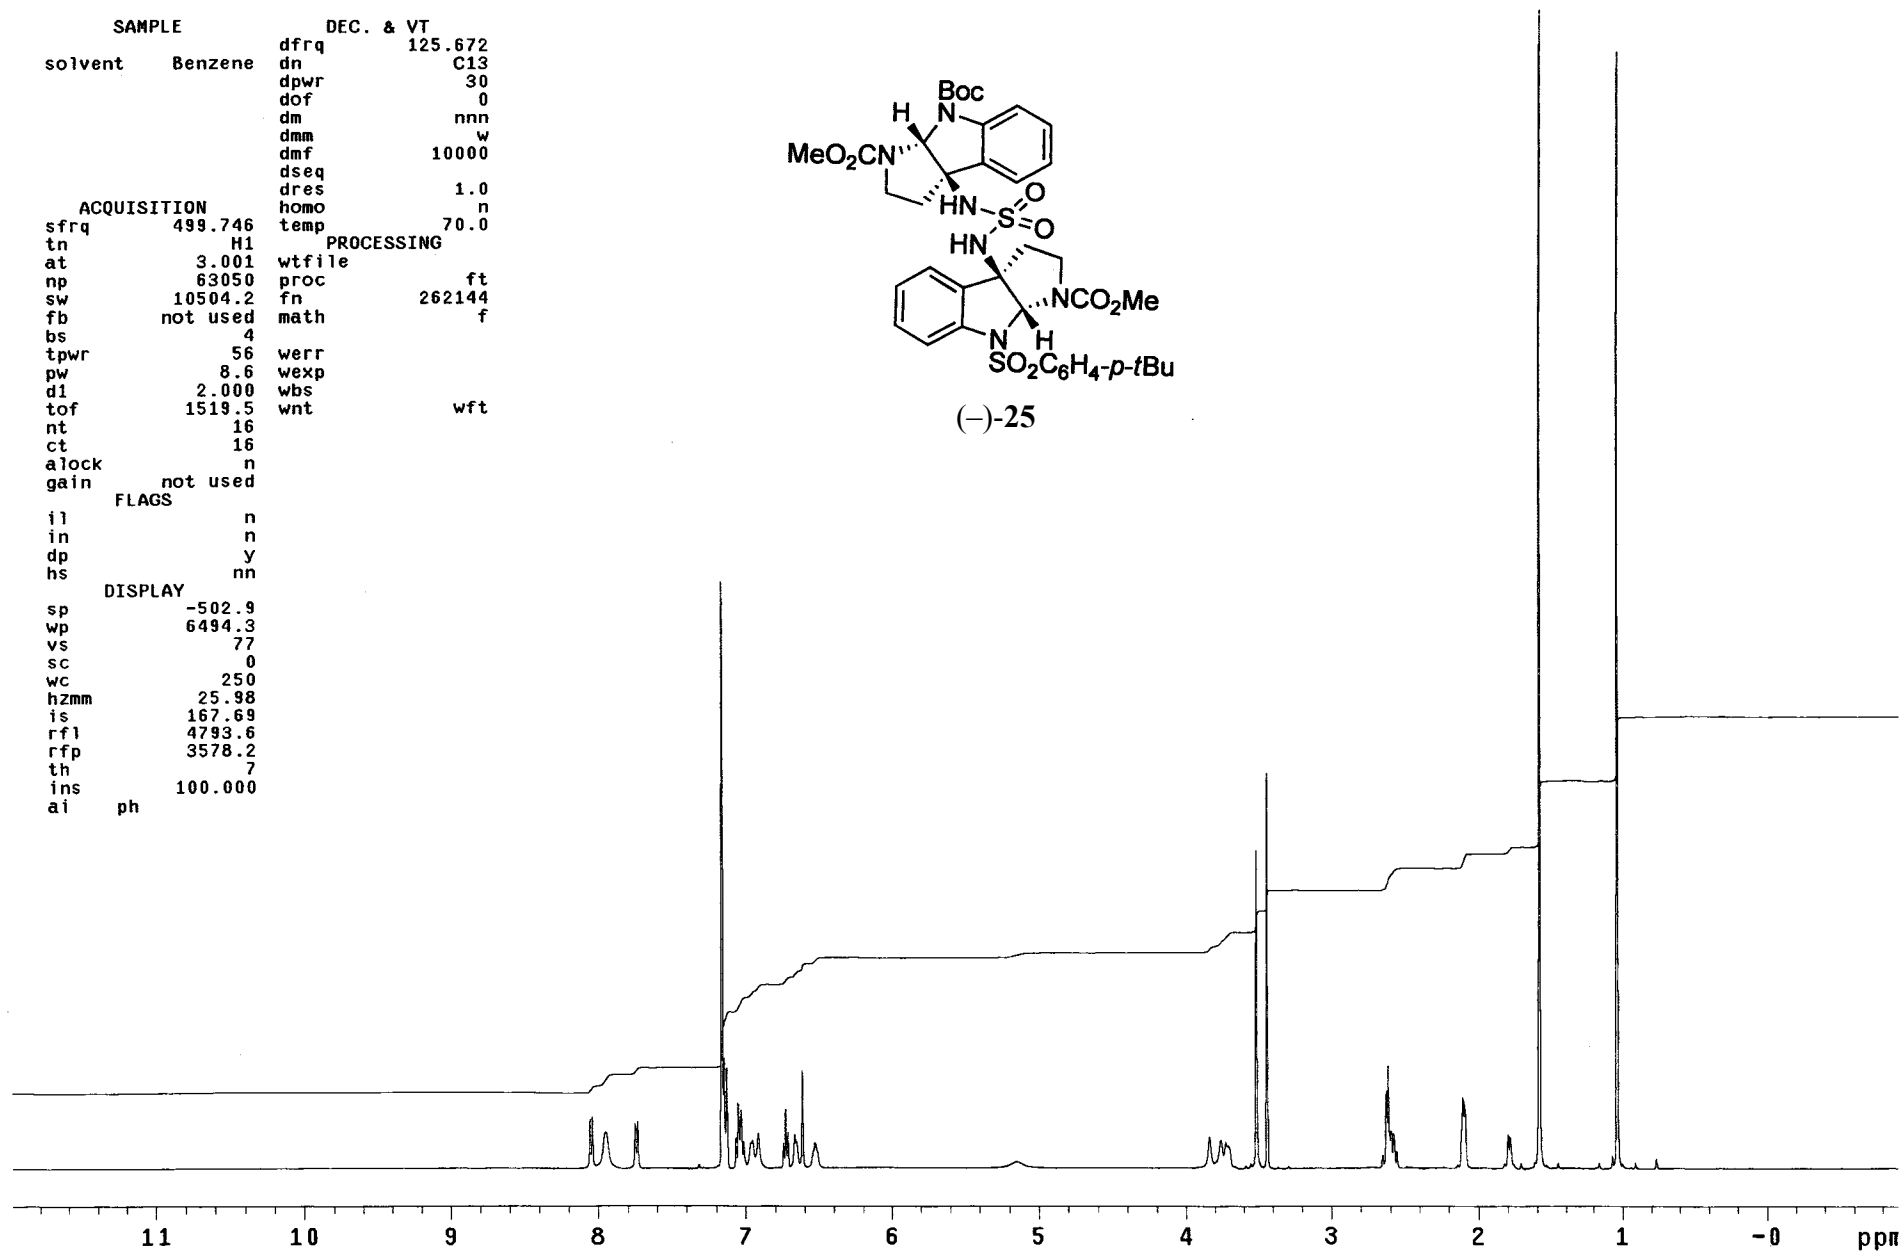

|             |          |            |         |
|-------------|----------|------------|---------|
| SAMPLE      |          | DEC. & VT  |         |
| solvent     | Benzene  | dfrq       | 500.229 |
|             |          | dn         | H1      |
|             |          | dpwr       | 39      |
|             |          | dof        | -500.0  |
|             |          | dm         | y       |
|             |          | dmm        | w       |
|             |          | dmf        | 10000   |
|             |          | dseq       |         |
|             |          | dres       | 1.0     |
|             |          | homo       | n       |
|             |          | temp       | 70.0    |
| ACQUISITION |          | PROCESSING |         |
| sfrq        | 125.795  | lb         | 0.30    |
| tn          | C13      | wtfile     |         |
| at          | 1.736    | proc       | ft      |
| np          | 131010   | fn         | 131072  |
| sw          | 37735.8  | math       | f       |
| fb          | not used |            |         |
| bs          | 32       |            |         |
| ss          | 1        |            |         |
| tpwr        | 58       | werr       |         |
| pw          | 6.9      | wexp       |         |
| d1          | 0.763    | wbs        |         |
| tof         | 631.4    | wnt        |         |
| nt          | 20000    |            |         |
| ct          | 6560     |            |         |
| alock       | n        |            |         |
| gain        | not used |            |         |
| FLAGS       |          |            |         |
| il          | n        |            |         |
| in          | n        |            |         |
| dp          | y        |            |         |
| hs          | nn       |            |         |
| DISPLAY     |          |            |         |
| sp          | -2533.9  |            |         |
| wp          | 30188.2  |            |         |
| vs          | 1147     |            |         |
| sc          | 0        |            |         |
| wc          | 250      |            |         |
| hzmm        | 120.75   |            |         |
| is          | 500.00   |            |         |
| rf1         | 22358.4  |            |         |
| rfp         | 16149.2  |            |         |
| th          | 20       |            |         |
| ins         | 1.000    |            |         |
| ai          | ph       |            |         |

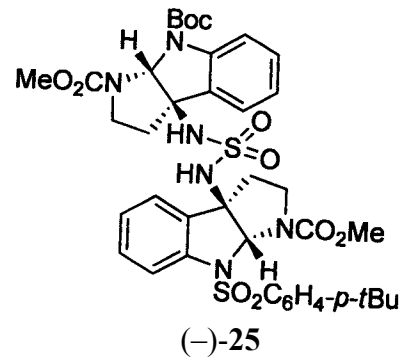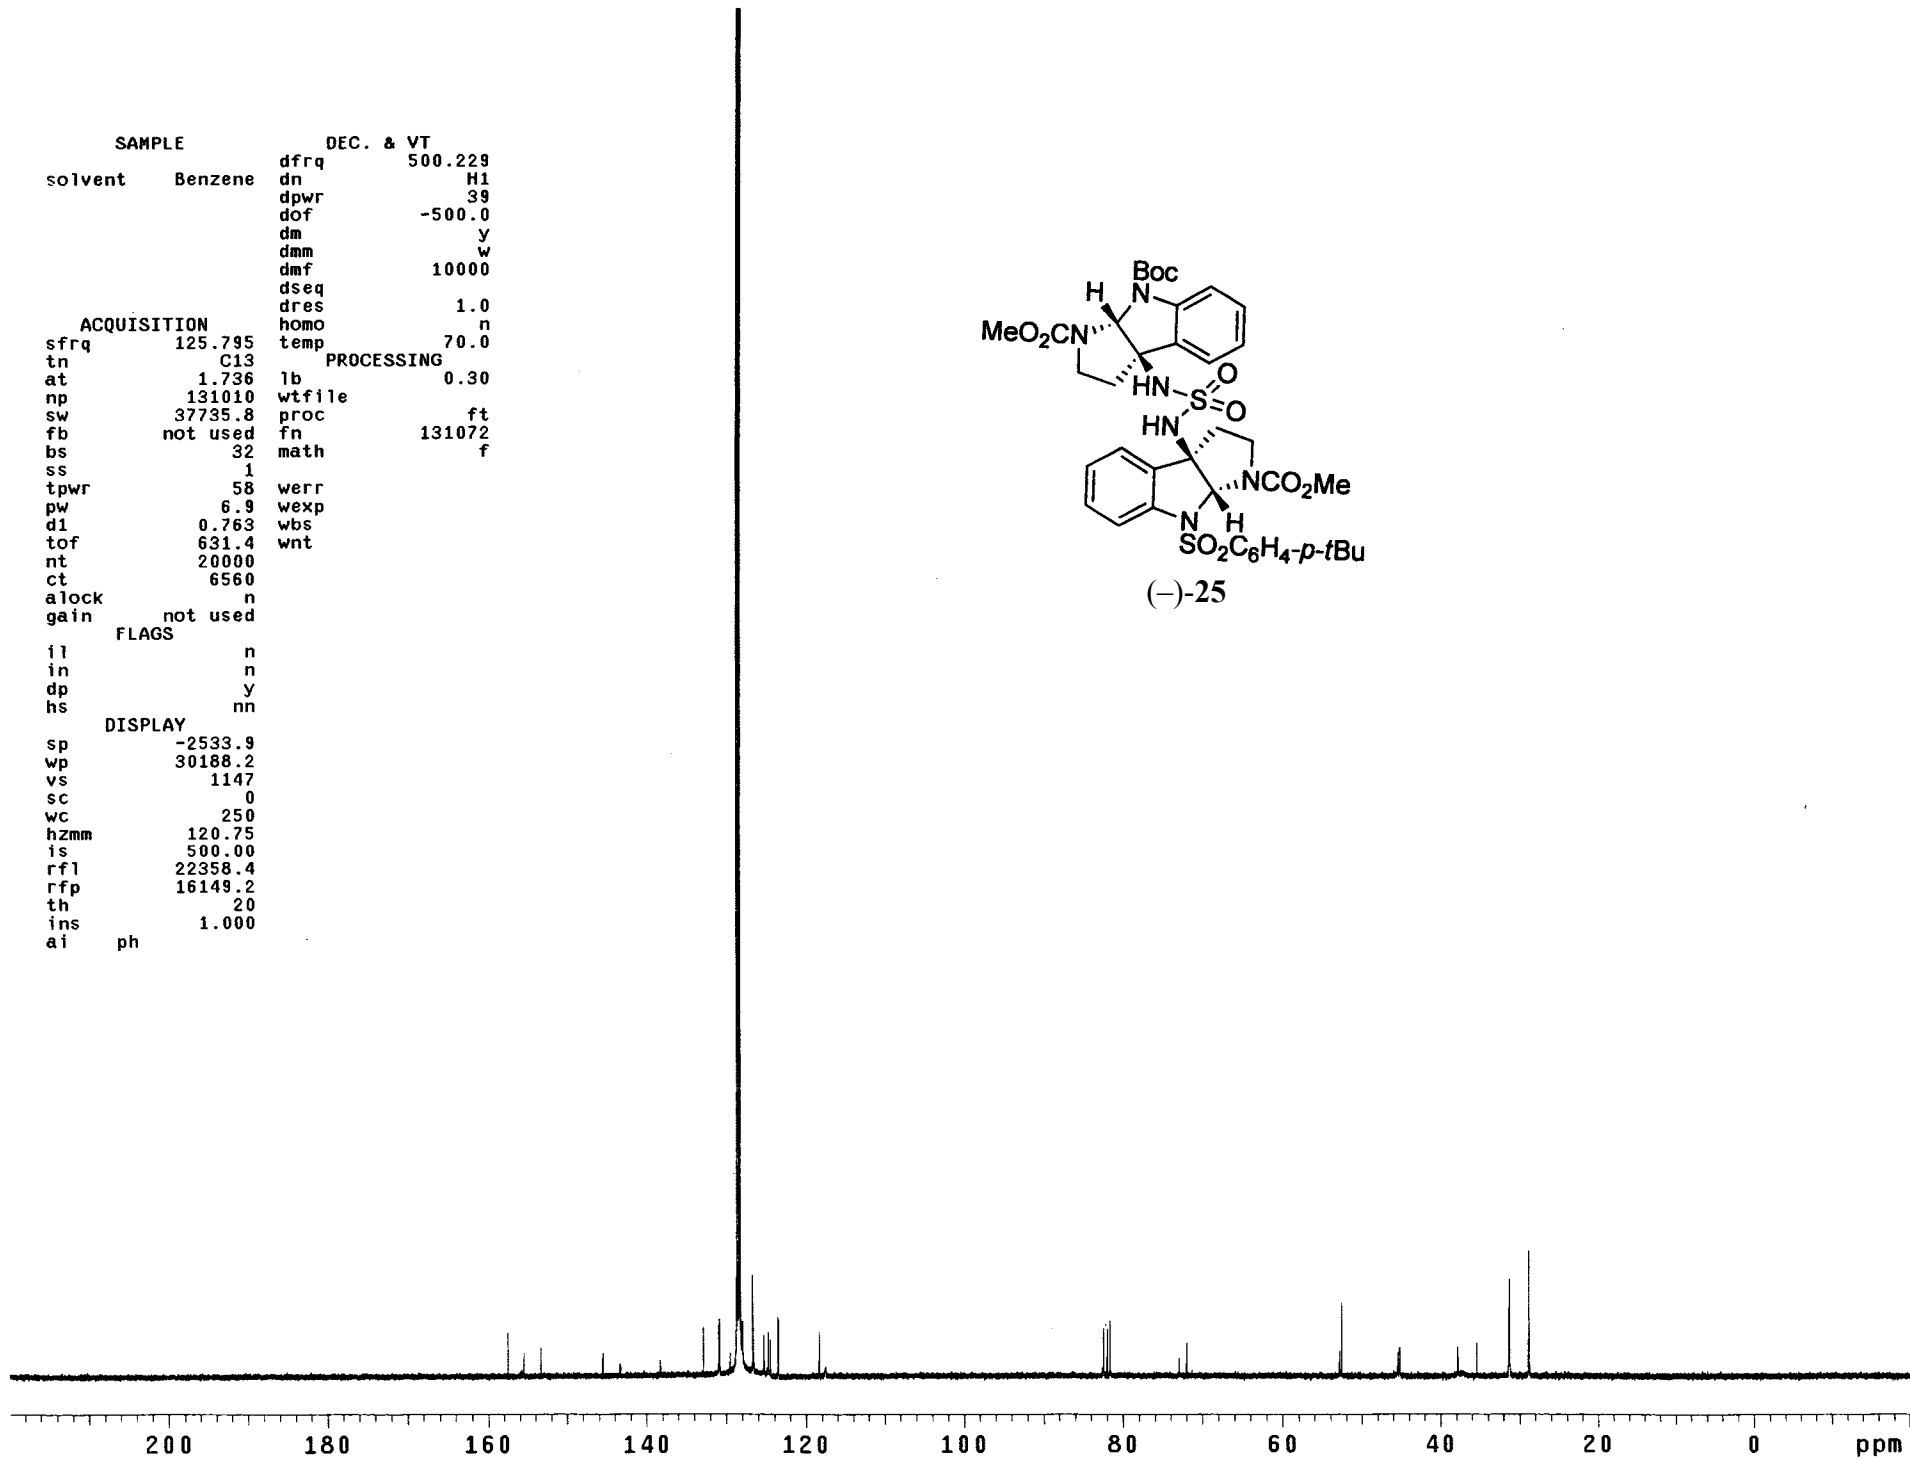

S110/S153

|             |          |            |         |
|-------------|----------|------------|---------|
| SAMPLE      |          | DEC. & VT  |         |
| solvent     | CD3CN    | dfrq       | 125.673 |
|             |          | dn         | C13     |
|             |          | dpwr       | 30      |
|             |          | dof        | 0       |
|             |          | dm         | nnn     |
|             |          | dmm        | w       |
|             |          | dmf        | 10000   |
|             |          | dseq       |         |
|             |          | dres       | 1.0     |
|             |          | homo       | n       |
|             |          | temp       | 50.0    |
| ACQUISITION |          | PROCESSING |         |
| sfrq        | 499.748  | wtfile     |         |
| tn          | H1       | proc       | ft      |
| at          | 3.001    | fn         | 262144  |
| np          | 63050    | math       | f       |
| sw          | 10504.2  |            |         |
| fb          | not used |            |         |
| bs          | 4        | werr       |         |
| tpwr        | 56       | wexp       |         |
| pw          | 8.6      | wbs        |         |
| d1          | 2.000    | wnt        | wft     |
| tof         | 1519.5   |            |         |
| nt          | 16       |            |         |
| ct          | 16       |            |         |
| alock       | n        |            |         |
| gain        | not used |            |         |
| FLAGS       |          |            |         |
| il          | n        |            |         |
| in          | n        |            |         |
| dp          | y        |            |         |
| hs          | nn       |            |         |
| DISPLAY     |          |            |         |
| sp          | -497.5   |            |         |
| wp          | 6505.0   |            |         |
| vs          | 32       |            |         |
| sc          | 0        |            |         |
| wc          | 250      |            |         |
| hzmm        | 26.02    |            |         |
| is          | 173.97   |            |         |
| rfl         | 2218.0   |            |         |
| rfp         | 969.5    |            |         |
| th          | 7        |            |         |
| ins         | 100.000  |            |         |
| ai          | ph       |            |         |

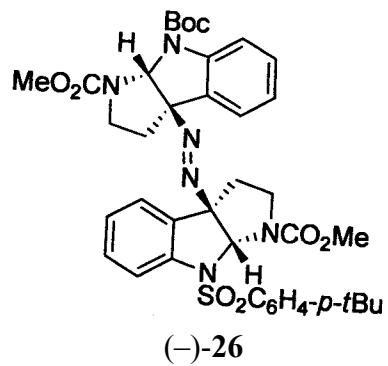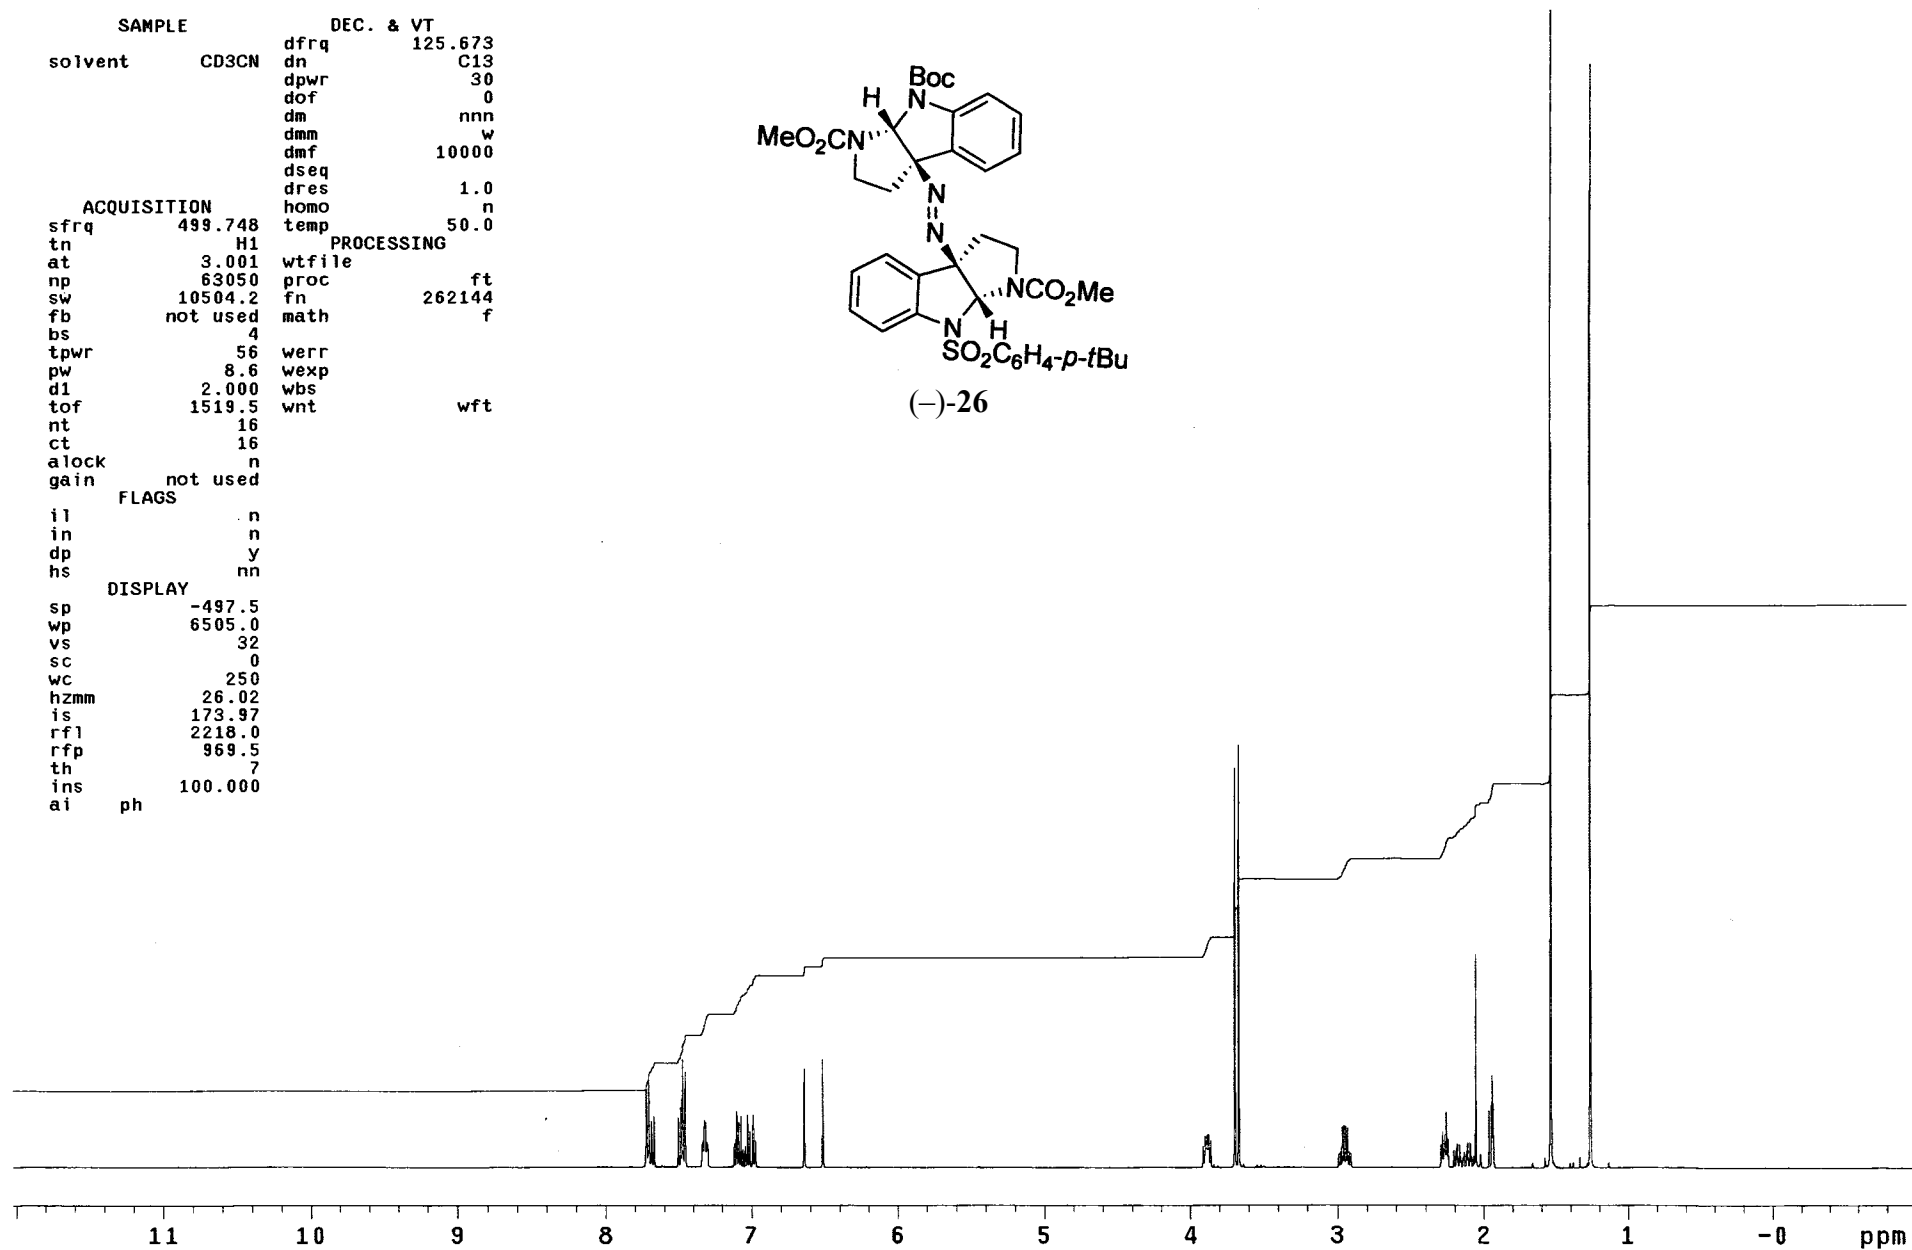

|             |          |            |         |
|-------------|----------|------------|---------|
| SAMPLE      |          | DEC. & VT  |         |
| solvent     | CD3CN    | dfrq       | 500.232 |
|             |          | dn         | H1      |
|             |          | dpwr       | 39      |
|             |          | dof        | -500.0  |
|             |          | dm         | y       |
|             |          | dmm        | w       |
|             |          | dmf        | 10000   |
|             |          | dseq       |         |
|             |          | dres       | 1.0     |
|             |          | homo       | n       |
|             |          | temp       | 50.0    |
| ACQUISITION |          | PROCESSING |         |
| sfrq        | 125.795  | lb         | 0.30    |
| tn          | C13      | wtfile     |         |
| at          | 1.736    | proc       | ft      |
| np          | 131010   | fn         | 131072  |
| sw          | 37735.8  | math       | f       |
| fb          | not used | werr       |         |
| bs          | 64       | wexp       |         |
| ss          | 1        | wbs        |         |
| tpwr        | 58       | wnt        |         |
| pw          | 6.9      |            |         |
| d1          | 0.763    |            |         |
| tof         | 631.4    |            |         |
| nt          | 25000    |            |         |
| ct          | 20352    |            |         |
| alock       | n        |            |         |
| gain        | not used |            |         |
| FLAGS       |          |            |         |
| il          | n        |            |         |
| in          | n        |            |         |
| dp          | y        |            |         |
| hs          | nn       |            |         |
| DISPLAY     |          |            |         |
| sp          | -2500.4  |            |         |
| wp          | 30175.6  |            |         |
| vs          | 251      |            |         |
| sc          | 0        |            |         |
| wc          | 250      |            |         |
| hzmm        | 120.70   |            |         |
| is          | 500.00   |            |         |
| rfl         | 21037.0  |            |         |
| rfp         | 14929.1  |            |         |
| th          | 20       |            |         |
| ins         | 1.000    |            |         |
| ai          | ph       |            |         |

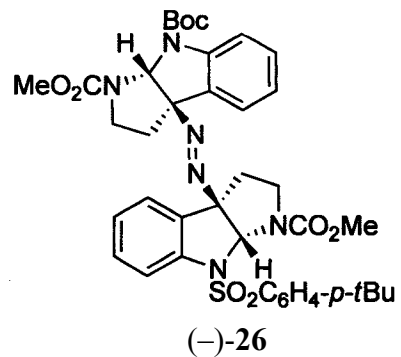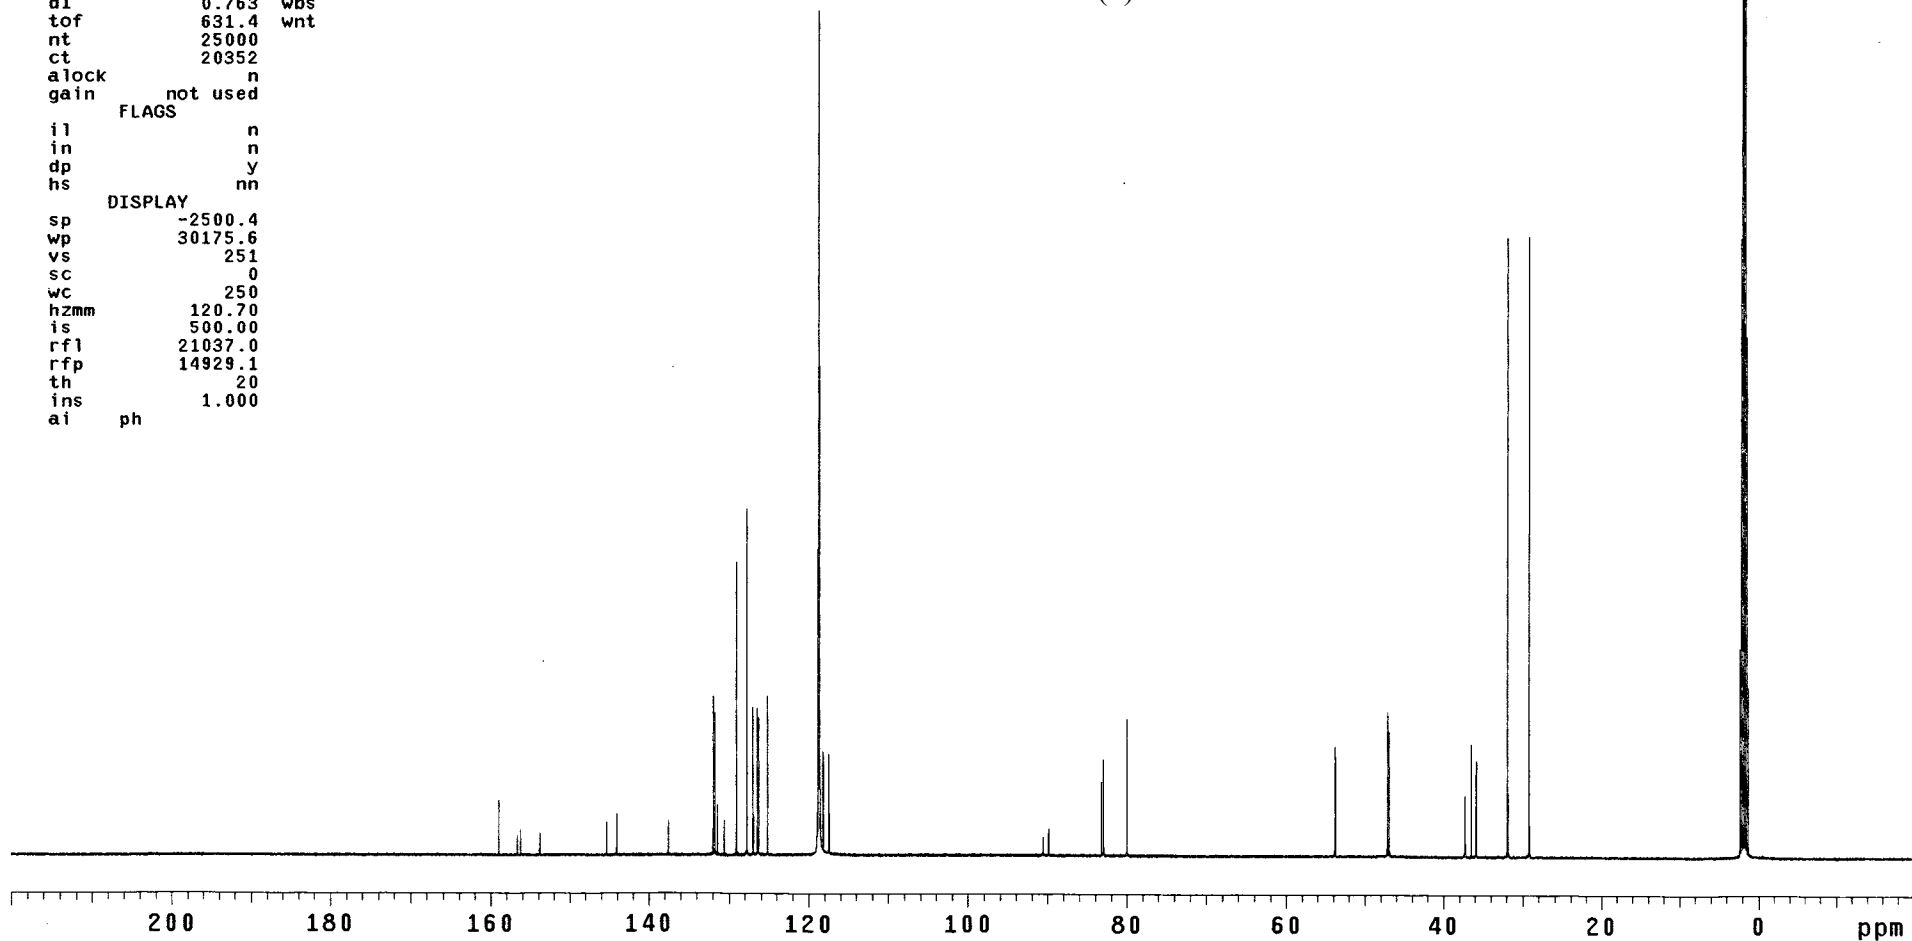

S112/S153

|             |          |            |         |
|-------------|----------|------------|---------|
| SAMPLE      |          | DEC. & VT  |         |
| solvent     | CD3CN    | dfrq       | 125.673 |
|             |          | dn         | C13     |
|             |          | dpwr       | 30      |
|             |          | dof        | 0       |
|             |          | dm         | nnn     |
|             |          | dmm        | w       |
|             |          | dmf        | 10000   |
|             |          | dseq       |         |
|             |          | dres       | 1.0     |
|             |          | homo       | n       |
|             |          | temp       | 75.0    |
| ACQUISITION |          | PROCESSING |         |
| sfrq        | 499.748  | wtfile     |         |
| tn          | H1       | proc       | ft      |
| at          | 3.001    | fn         | 262144  |
| np          | 63050    | math       | f       |
| sw          | 10504.2  |            |         |
| fb          | not used |            |         |
| bs          | 4        | werr       |         |
| tpwr        | 56       | wexp       |         |
| pw          | 8.6      | wbs        |         |
| d1          | 2.000    | wnt        | wft     |
| tof         | 1519.5   |            |         |
| nt          | 16       |            |         |
| ct          | 16       |            |         |
| alock       | n        |            |         |
| gain        | not used |            |         |
| FLAGS       |          |            |         |
| il          | n        |            |         |
| in          | n        |            |         |
| dp          | y        |            |         |
| hs          | nn       |            |         |
| DISPLAY     |          |            |         |
| sp          | -515.4   |            |         |
| wp          | 6522.5   |            |         |
| vs          | 70       |            |         |
| sc          | 0        |            |         |
| wc          | 250      |            |         |
| hzmm        | 26.09    |            |         |
| is          | 188.01   |            |         |
| rfl         | 2218.5   |            |         |
| rfl         | 969.5    |            |         |
| th          | 7        |            |         |
| ins         | 100.000  |            |         |
| ai          | ph       |            |         |

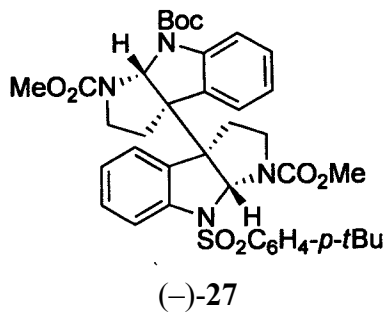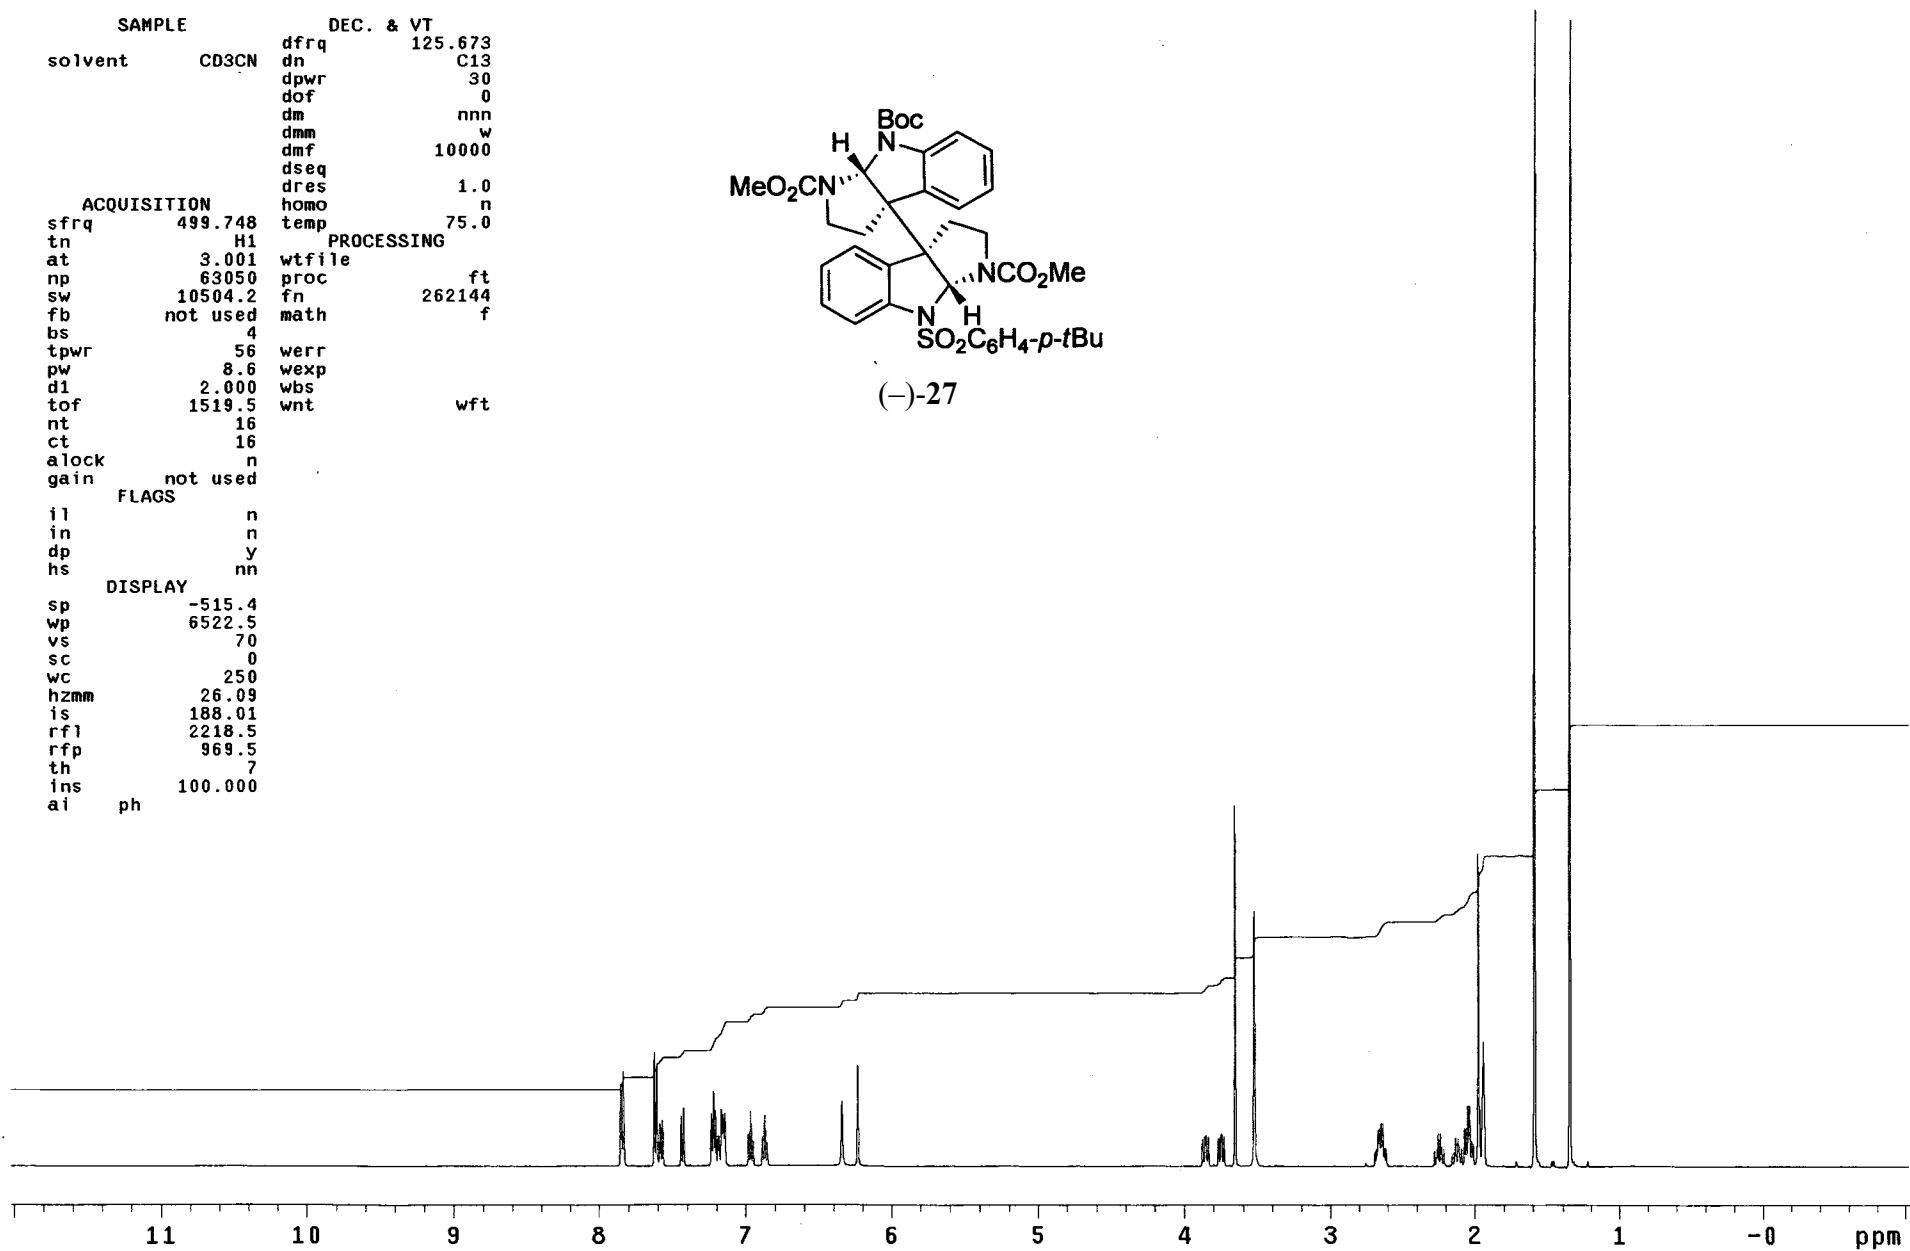



|             |          |            |         |
|-------------|----------|------------|---------|
| SAMPLE      |          | DEC. & VT  |         |
| solvent     | CD3CN    | dfrq       | 500.232 |
|             |          | dn         | H1      |
|             |          | dpwr       | 39      |
|             |          | dof        | -500.0  |
|             |          | dm         | y       |
|             |          | dmm        | w       |
|             |          | dmf        | 10000   |
|             |          | dseq       |         |
|             |          | dres       | 1.0     |
|             |          | homo       | n       |
|             |          | temp       | 70.0    |
| ACQUISITION |          | PROCESSING |         |
| sfrq        | 125.795  | lb         | 0.30    |
| tn          | C13      | wtfile     |         |
| at          | 1.736    | proc       | ft      |
| np          | 131010   | fn         | 131072  |
| sw          | 37735.8  | math       | f       |
| fb          | not used | werr       |         |
| bs          | 64       | wexp       |         |
| ss          | 1        | wbs        |         |
| tpwr        | 58       | wnt        |         |
| pw          | 6.9      |            |         |
| d1          | 0.763    |            |         |
| tof         | 631.4    |            |         |
| nt          | 25000    |            |         |
| ct          | 17728    |            |         |
| alock       | n        |            |         |
| gain        | not used |            |         |
| FLAGS       |          |            |         |
| il          | n        |            |         |
| in          | n        |            |         |
| dp          | y        |            |         |
| hs          | nn       |            |         |
| DISPLAY     |          |            |         |
| sp          | -2505.0  |            |         |
| wp          | 30143.9  |            |         |
| vs          | 840      |            |         |
| sc          | 0        |            |         |
| wc          | 250      |            |         |
| hzmm        | 120.58   |            |         |
| is          | 500.00   |            |         |
| rfl         | 21010.5  |            |         |
| rfp         | 14929.1  |            |         |
| th          | 20       |            |         |
| ins         | 1.000    |            |         |
| ai          | ph       |            |         |

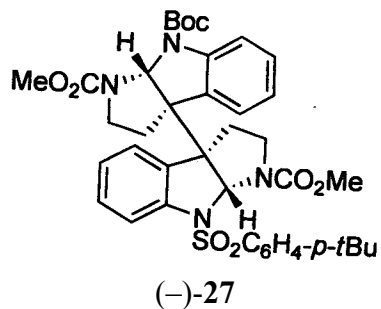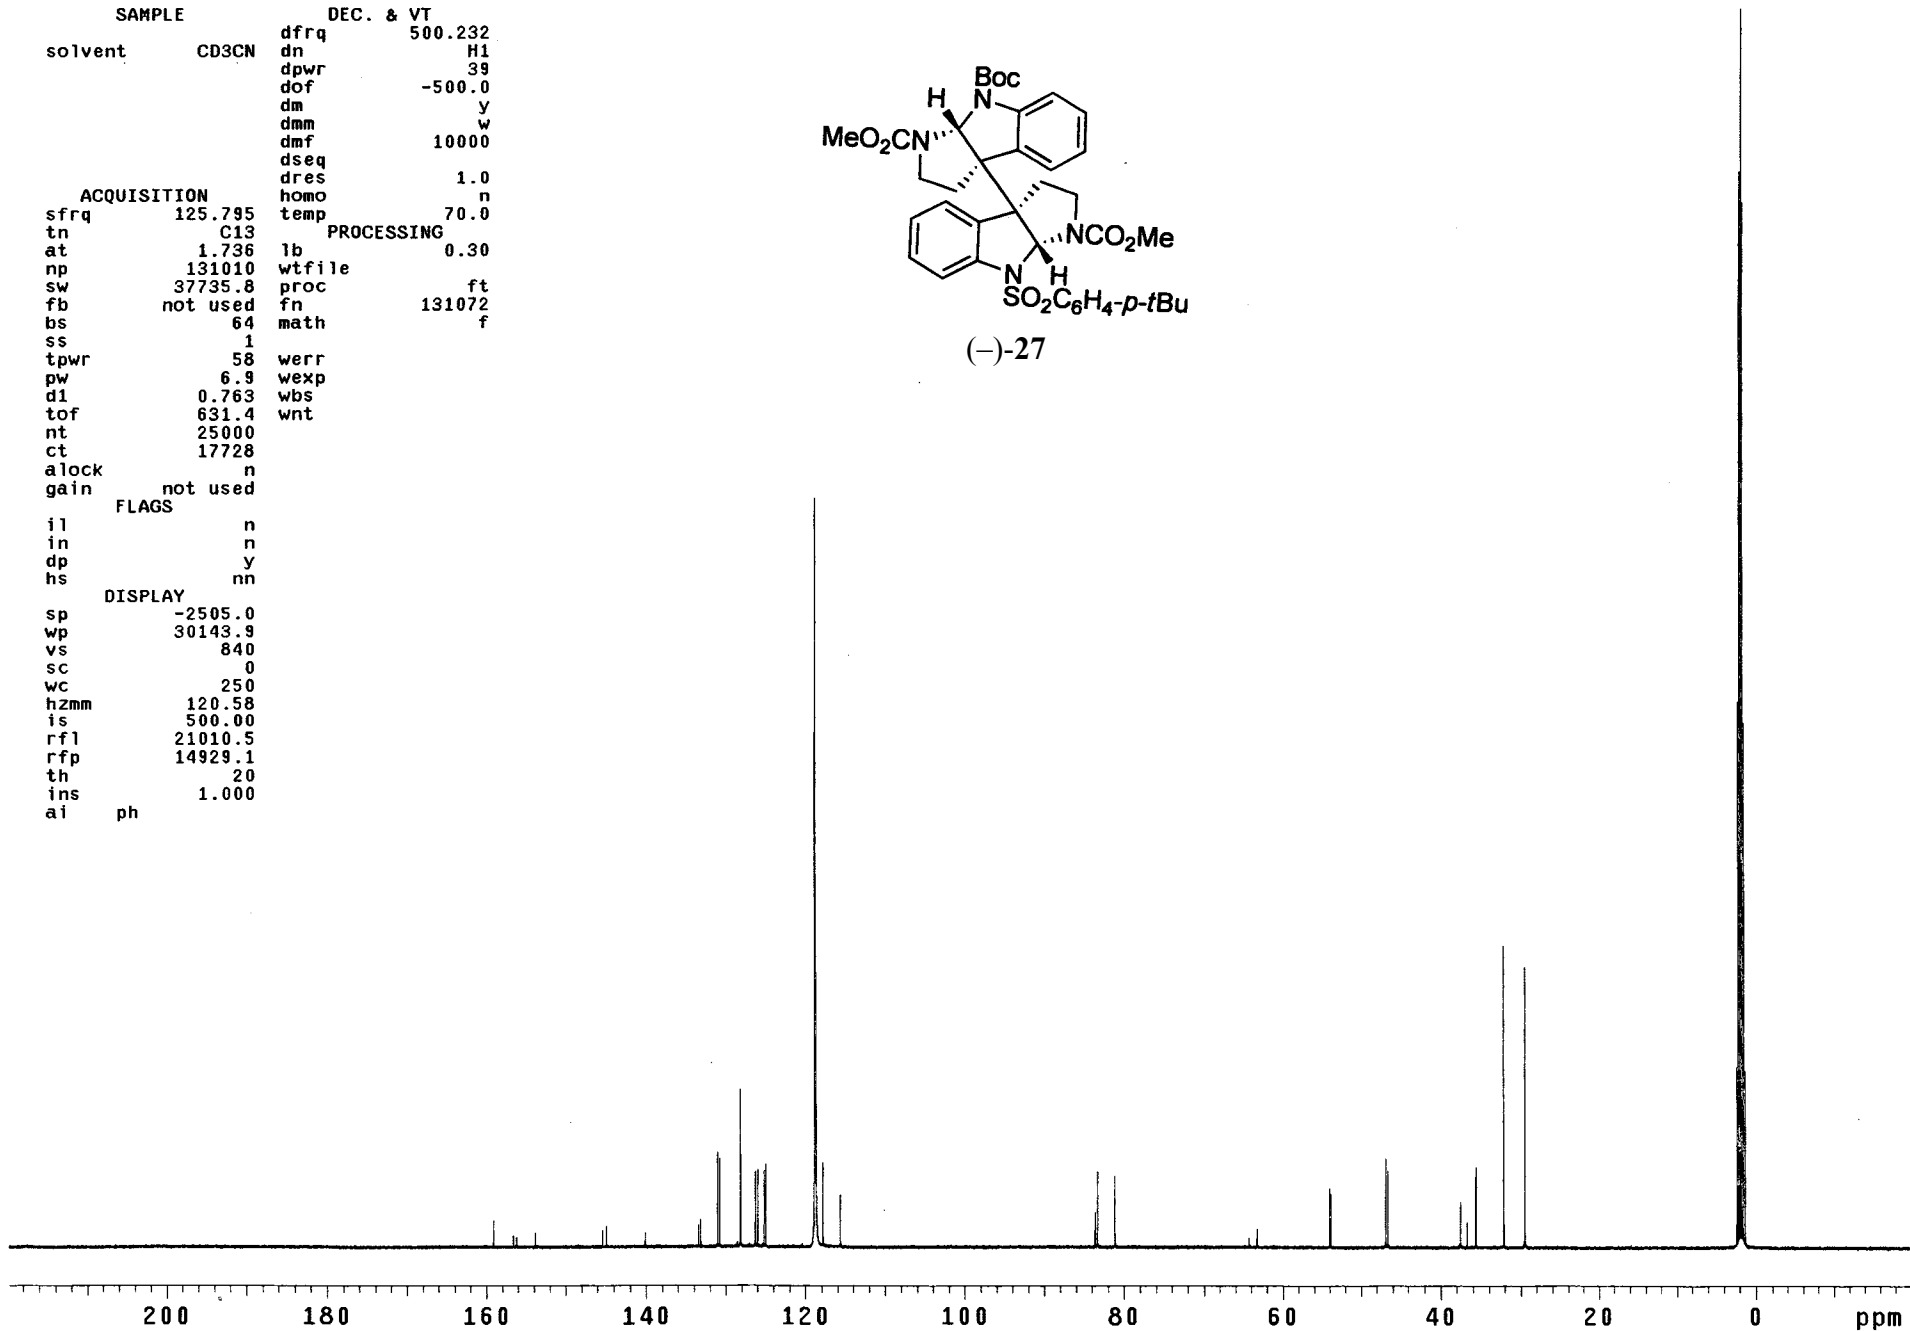

|             |          |            |         |
|-------------|----------|------------|---------|
| SAMPLE      |          | DEC. & VT  |         |
| solvent     | Benzene  | dfrq       | 125.672 |
|             |          | dn         | C13     |
|             |          | dpwr       | 30      |
|             |          | dof        | 0       |
|             |          | dm         | nnn     |
|             |          | dmm        | w       |
|             |          | dmf        | 10000   |
|             |          | dseq       |         |
|             |          | dres       | 1.0     |
|             |          | homo       | n       |
|             |          | temp       | 70.0    |
| ACQUISITION |          | PROCESSING |         |
| sfrq        | 499.746  | wtfile     |         |
| tn          | H1       | proc       | ft      |
| at          | 3.001    | fn         | 262144  |
| np          | 63050    | math       | f       |
| sw          | 10504.2  |            |         |
| fb          | not used |            |         |
| bs          | 4        |            |         |
| tpwr        | 56       | werr       |         |
| pw          | 8.6      | wexp       |         |
| d1          | 2.000    | wbs        |         |
| tof         | 1519.5   | wnt        | wft     |
| nt          | 16       |            |         |
| ct          | 16       |            |         |
| alock       | n        |            |         |
| gain        | not used |            |         |
| FLAGS       |          |            |         |
| il          | n        |            |         |
| in          | n        |            |         |
| dp          | y        |            |         |
| hs          | nn       |            |         |
| DISPLAY     |          |            |         |
| sp          | -512.5   |            |         |
| wp          | 6512.6   |            |         |
| vs          | 25       |            |         |
| sc          | 0        |            |         |
| wc          | 250      |            |         |
| hzmm        | 26.05    |            |         |
| is          | 156.68   |            |         |
| rfl         | 4793.9   |            |         |
| rfp         | 3578.2   |            |         |
| th          | 7        |            |         |
| ins         | 100.000  |            |         |
| ai          | ph       |            |         |

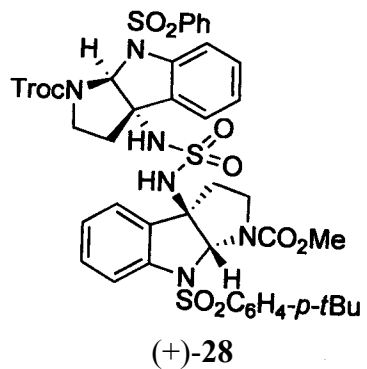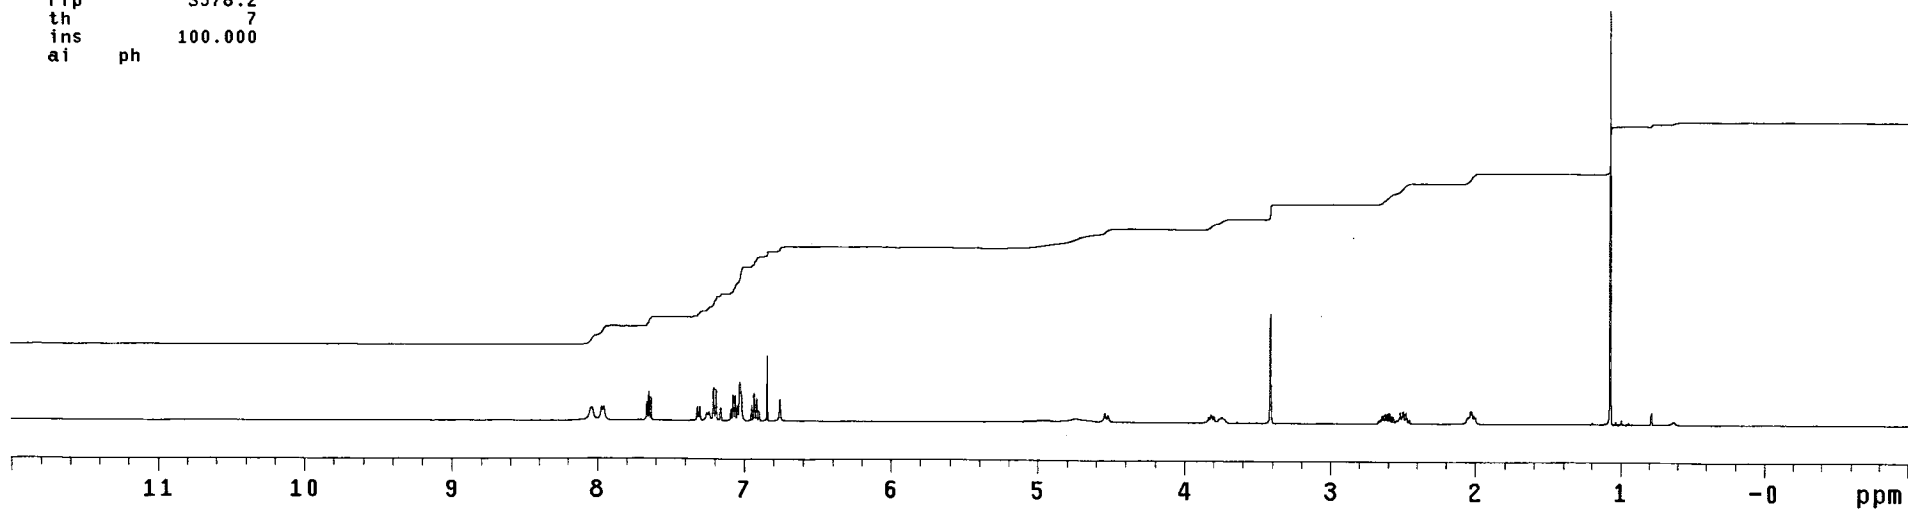

|             |          |            |         |
|-------------|----------|------------|---------|
| SAMPLE      |          | DEC. & VT  |         |
| solvent     | Benzene  | dfrq       | 500.229 |
|             |          | dn         | H1      |
|             |          | dpwr       | 39      |
|             |          | dof        | -500.0  |
|             |          | dm         | y       |
|             |          | dmm        | w       |
|             |          | dof        | 10000   |
|             |          | dseq       |         |
|             |          | dres       | 1.0     |
|             |          | homo       | n       |
|             |          | temp       | 70.0    |
| ACQUISITION |          | PROCESSING |         |
| sfrq        | 125.795  | lb         | 0.30    |
| tn          | C13      | wtfile     |         |
| at          | 1.736    | proc       | ft      |
| np          | 131010   | fn         | 131072  |
| sw          | 37735.8  | math       | f       |
| fb          | not used |            |         |
| bs          | 32       |            |         |
| ss          | 1        |            |         |
| tpwr        | 58       | werr       |         |
| pw          | 6.9      | wexp       |         |
| d1          | 0.763    | wbs        |         |
| tof         | 631.4    | wnt        |         |
| nt          | 20000    |            |         |
| ct          | 6784     |            |         |
| alock       | n        |            |         |
| gain        | not used |            |         |
| FLAGS       |          |            |         |
| il          | n        |            |         |
| in          | n        |            |         |
| dp          | y        |            |         |
| hs          | nn       |            |         |
| DISPLAY     |          |            |         |
| sp          | -2533.9  |            |         |
| wp          | 30220.5  |            |         |
| vs          | 560      |            |         |
| sc          | 0        |            |         |
| wc          | 250      |            |         |
| hzmm        | 120.88   |            |         |
| ls          | 500.00   |            |         |
| rfl         | 22358.4  |            |         |
| rfp         | 16149.2  |            |         |
| th          | 20       |            |         |
| ins         | 1.000    |            |         |
| ai          | ph       |            |         |

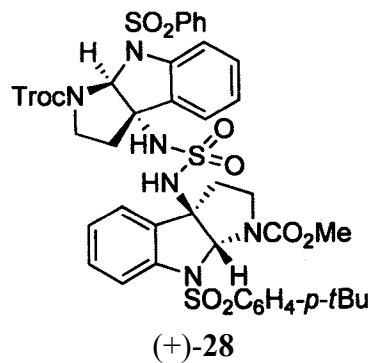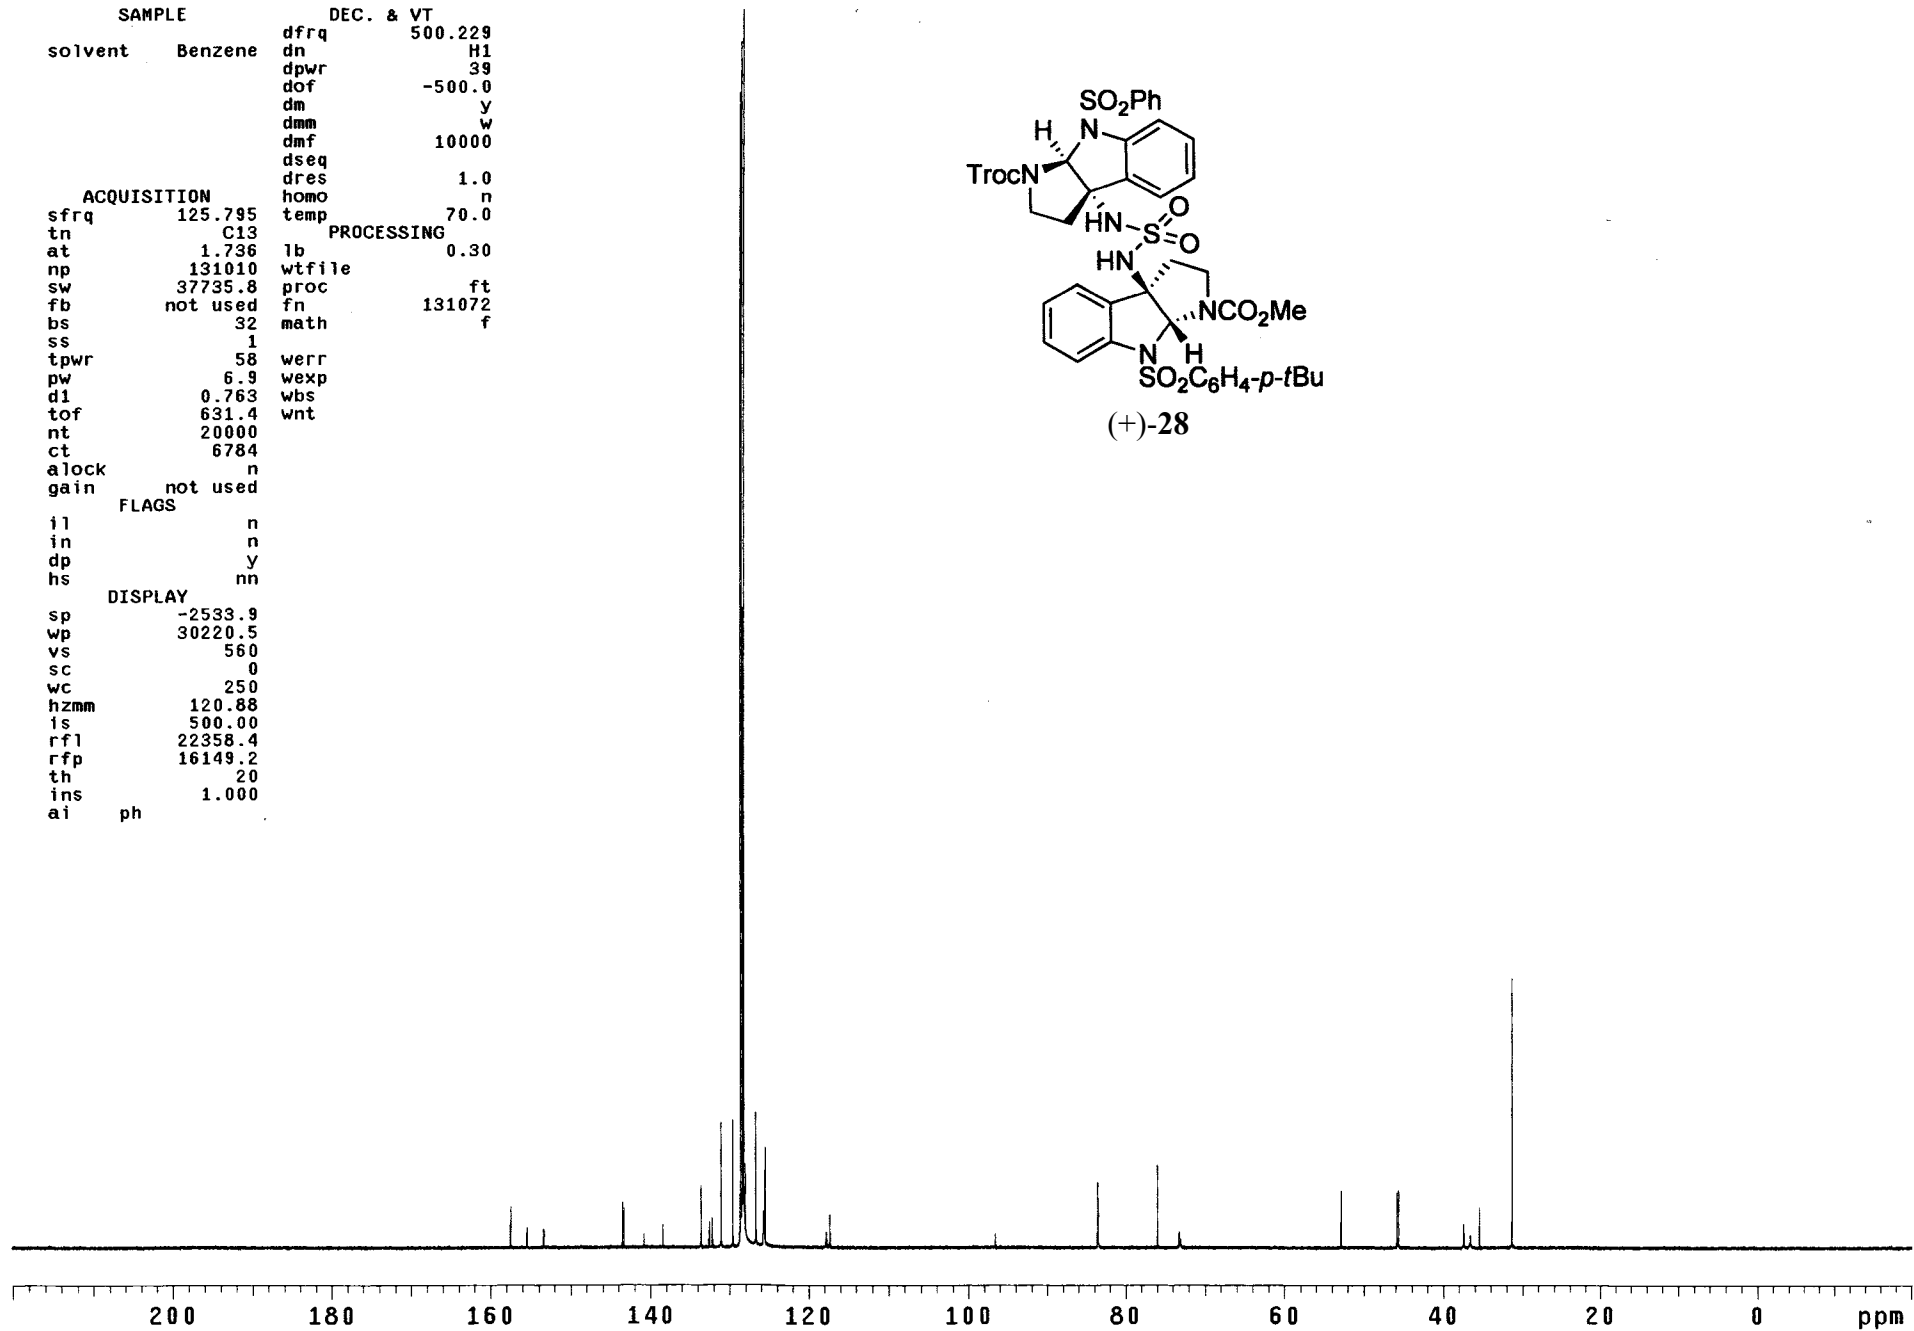

|             |          |            |         |
|-------------|----------|------------|---------|
| SAMPLE      |          | DEC. & VT  |         |
| solvent     | CD3CN    | dfrq       | 125.673 |
|             |          | dn         | C13     |
|             |          | dpwr       | 30      |
|             |          | dof        | 0       |
|             |          | dm         | nnn     |
|             |          | dmm        | w       |
|             |          | dmf        | 10000   |
|             |          | dseq       |         |
|             |          | dres       | 1.0     |
|             |          | homo       | n       |
|             |          | temp       | 70.0    |
| ACQUISITION |          | PROCESSING |         |
| sfrq        | 499.748  | wtfile     |         |
| tn          | H1       | proc       | ft      |
| at          | 3.001    | fn         | 262144  |
| np          | 63050    | math       | f       |
| sw          | 10504.2  |            |         |
| fb          | not used |            |         |
| bs          | 8        |            |         |
| tpwr        | 56       | werr       |         |
| pw          | 8.6      | wexp       |         |
| d1          | 2.000    | wbs        |         |
| tof         | 1519.5   | wnt        | wft     |
| nt          | 32       |            |         |
| ct          | 16       |            |         |
| alock       | n        |            |         |
| gain        | not used |            |         |
| FLAGS       |          |            |         |
| il          | n        |            |         |
| in          | n        |            |         |
| dp          | y        |            |         |
| hs          | nn       |            |         |
| DISPLAY     |          |            |         |
| sp          | -499.2   |            |         |
| wp          | 6485.1   |            |         |
| vs          | 20       |            |         |
| sc          | 0        |            |         |
| wc          | 250      |            |         |
| hzmm        | 25.94    |            |         |
| is          | 164.51   |            |         |
| rfl         | 2217.7   |            |         |
| rfp         | 969.5    |            |         |
| th          | 7        |            |         |
| ins         | 100.000  |            |         |
| ai          | ph       |            |         |

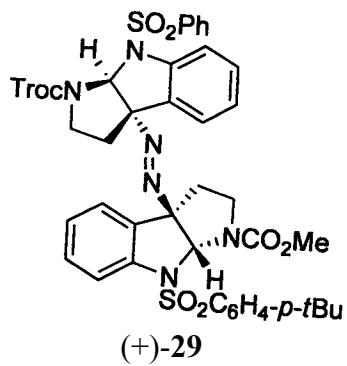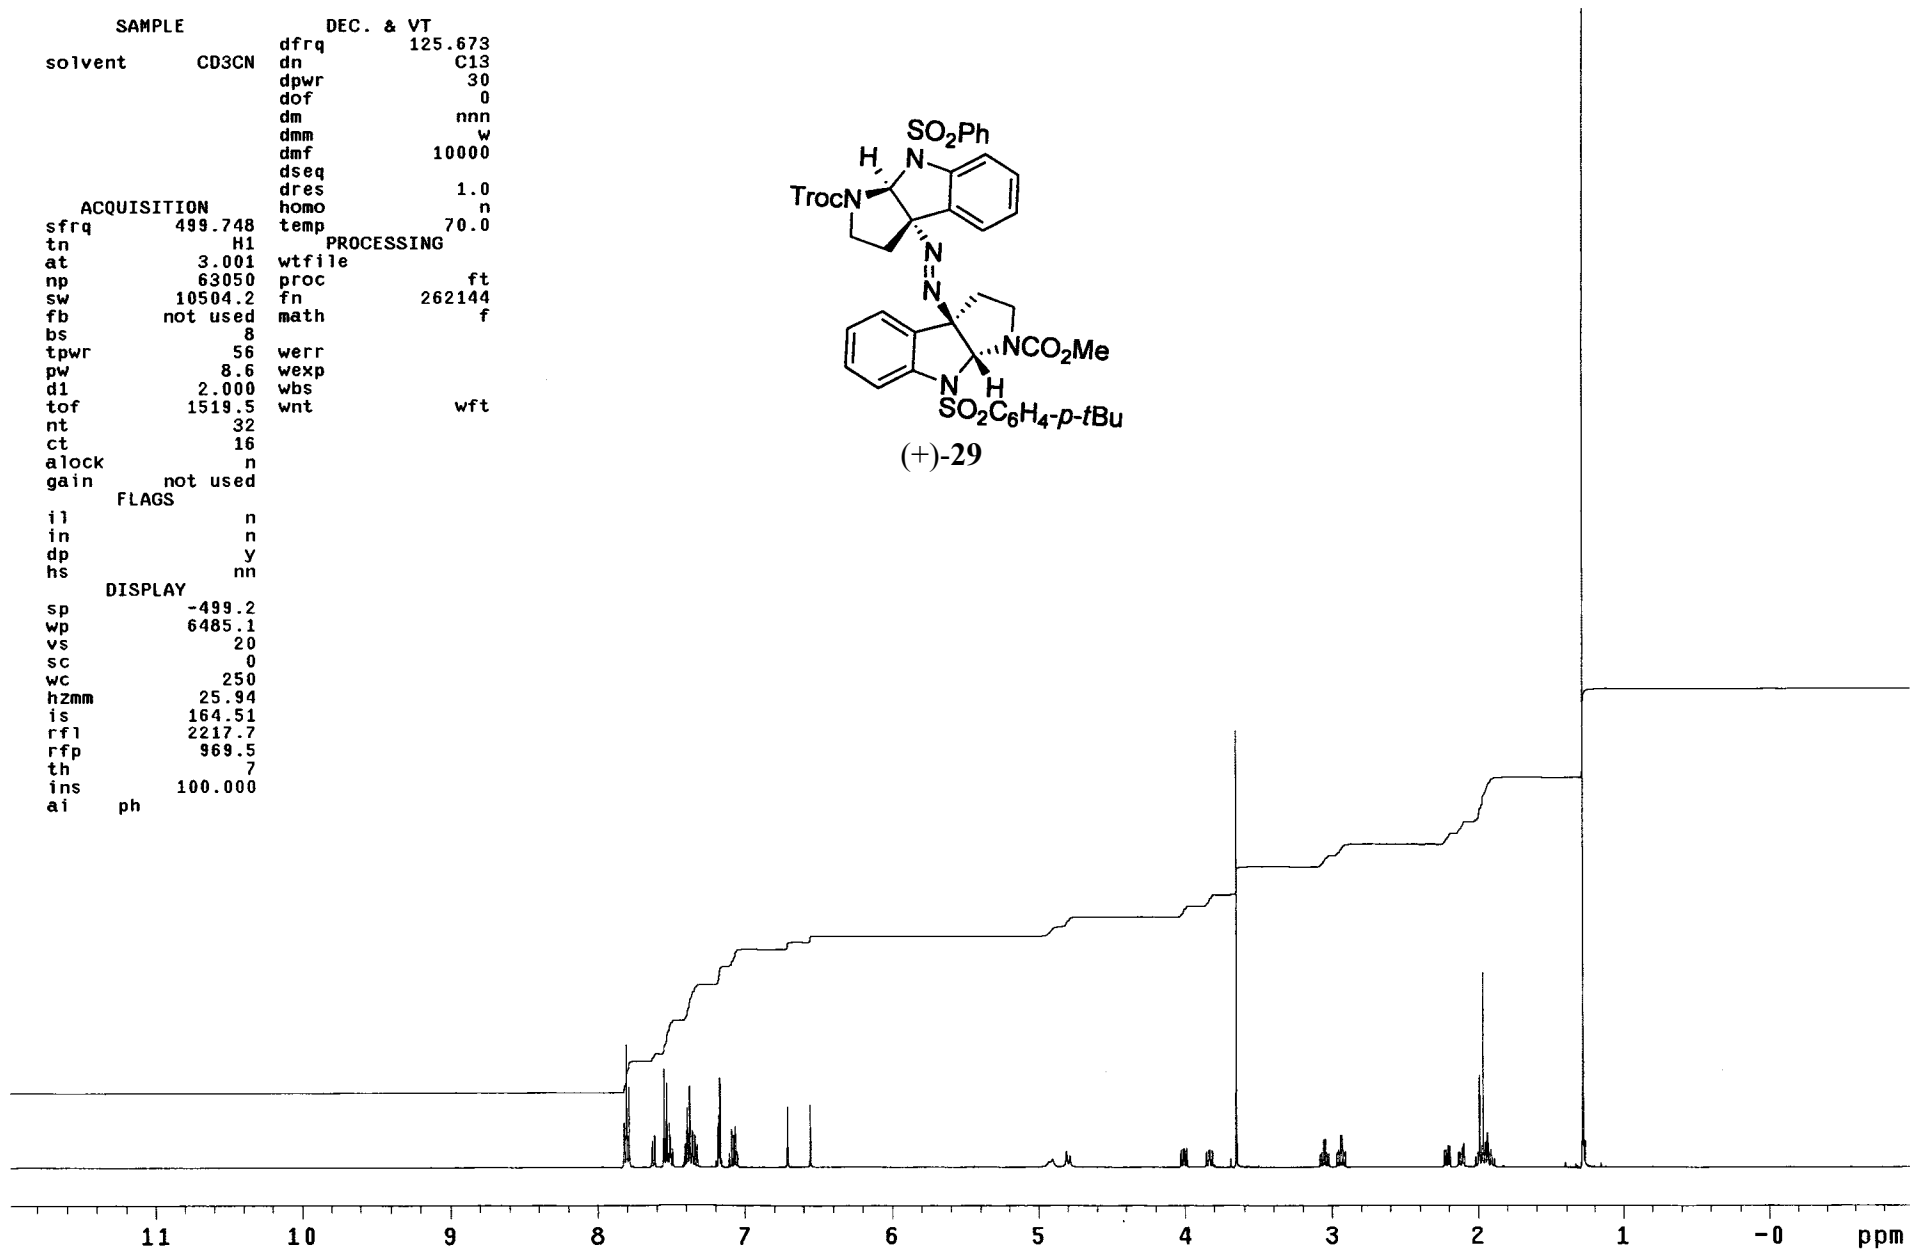

|             |          |            |         |
|-------------|----------|------------|---------|
| SAMPLE      |          | DEC. & VT  |         |
| solvent     | CD3CN    | dfrq       | 500.232 |
|             |          | dn         | H1      |
|             |          | dpwr       | 38      |
|             |          | dof        | -500.0  |
|             |          | dm         | y       |
|             |          | dmm        | w       |
|             |          | dmf        | 10700   |
|             |          | dseq       | 1.0     |
|             |          | dres       | n       |
|             |          | homo       | n       |
|             |          | temp       | 70.0    |
| ACQUISITION |          | PROCESSING |         |
| sfrq        | 125.795  | lb         | 0.30    |
| tn          | C13      | wtfile     |         |
| at          | 1.736    | proc       | ft      |
| np          | 131010   | fn         | 131072  |
| sw          | 37735.8  | math       | f       |
| fb          | not used |            |         |
| bs          | 32       |            |         |
| ss          | 1        |            |         |
| tpwr        | 59       | werr       |         |
| pw          | 6.9      | wexp       |         |
| d1          | 0.763    | wbs        |         |
| tof         | 631.4    | wnt        |         |
| nt          | 20000    |            |         |
| ct          | 19200    |            |         |
| alock       | n        |            |         |
| gain        | not used |            |         |
| FLAGS       |          |            |         |
| il          | n        |            |         |
| in          | n        |            |         |
| dp          | y        |            |         |
| hs          | nn       |            |         |
| DISPLAY     |          |            |         |
| sp          | -2540.2  |            |         |
| wp          | 30220.5  |            |         |
| vs          | 290      |            |         |
| sc          | 0        |            |         |
| wc          | 250      |            |         |
| hzmm        | 120.88   |            |         |
| is          | 500.00   |            |         |
| rfl         | 21013.4  |            |         |
| rfp         | 14929.1  |            |         |
| th          | 3        |            |         |
| ins         | 1.000    |            |         |
| ai          | ph       |            |         |

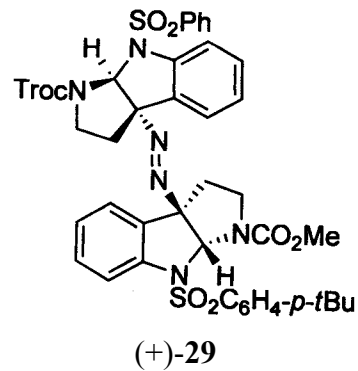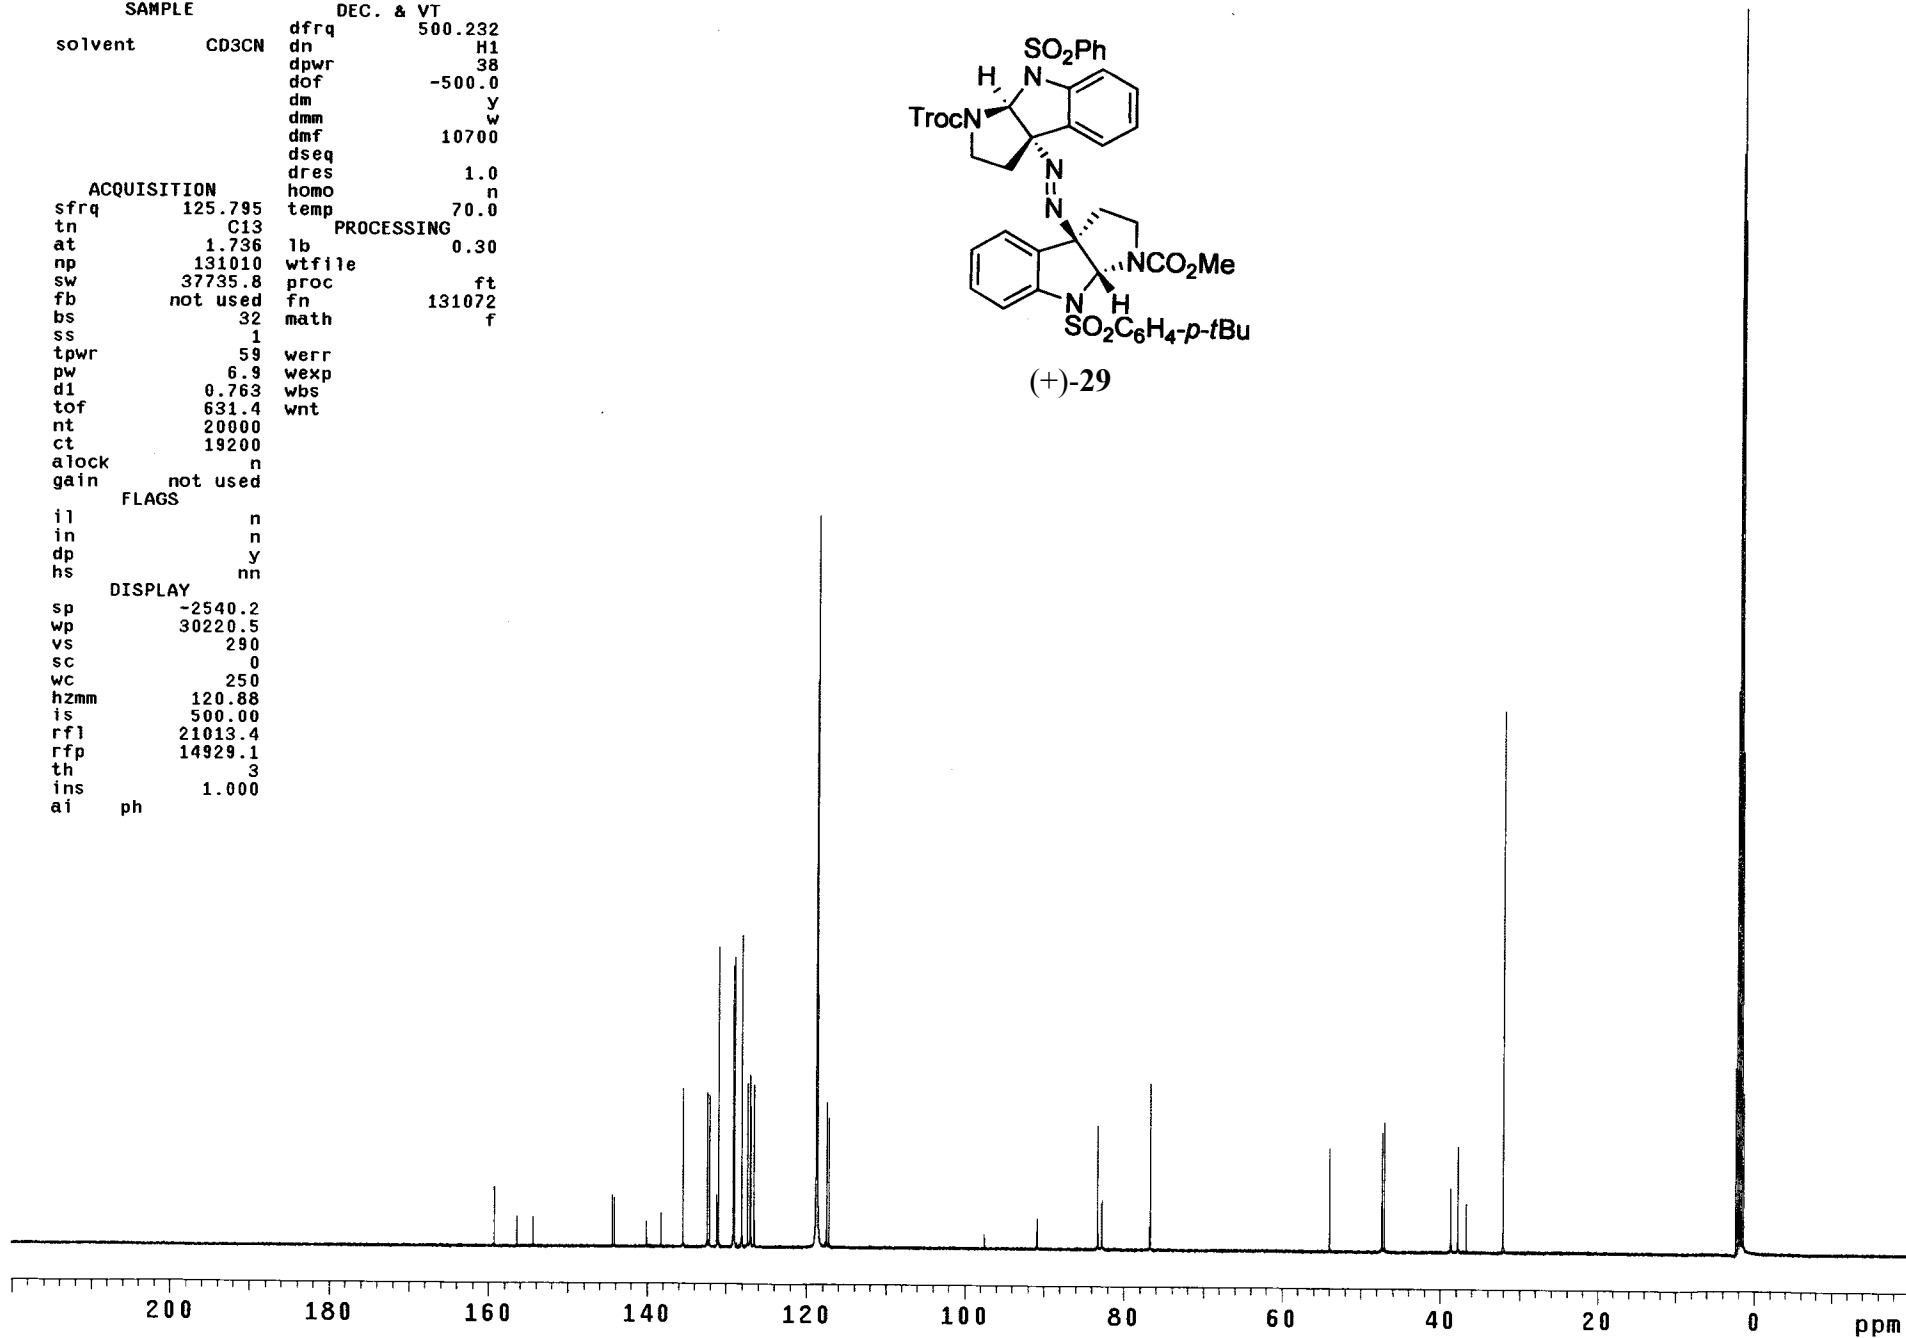

|             |          |            |         |
|-------------|----------|------------|---------|
| SAMPLE      |          | DEC. & VT  |         |
| solvent     | DMSO     | dfrq       | 125.673 |
|             |          | dn         | C13     |
|             |          | dpwr       | 30      |
|             |          | dof        | 0       |
|             |          | dm         | nnn     |
|             |          | dmm        | w       |
|             |          | dmf        | 10000   |
|             |          | dseq       |         |
|             |          | dres       | 1.0     |
|             |          | homo       | n       |
|             |          | temp       | 100.0   |
| ACQUISITION |          | PROCESSING |         |
| sfrq        | 499.748  | wtfile     |         |
| tn          | H1       | proc       | ft      |
| at          | 3.001    | fn         | 262144  |
| np          | 63050    | math       | f       |
| sw          | 10504.2  |            |         |
| fb          | not used |            |         |
| bs          | 4        |            |         |
| tpwr        | 56       | werr       |         |
| pw          | 8.6      | wexp       |         |
| d1          | 2.000    | wbs        |         |
| tof         | 1519.5   | wnt        | wft     |
| nt          | 16       |            |         |
| ct          | 16       |            |         |
| alock       | n        |            |         |
| gain        | not used |            |         |
| FLAGS       |          |            |         |
| il          | n        |            |         |
| in          | n        |            |         |
| dp          | y        |            |         |
| hs          | nn       |            |         |
| DISPLAY     |          |            |         |
| sp          | -512.5   |            |         |
| wp          | 6505.0   |            |         |
| vs          | 46       |            |         |
| sc          | 0        |            |         |
| wc          | 250      |            |         |
| hzmm        | 26.02    |            |         |
| is          | 167.87   |            |         |
| rfl         | 2478.0   |            |         |
| rfp         | 1249.4   |            |         |
| th          | 7        |            |         |
| ins         | 100.000  |            |         |
| ai          | ph       |            |         |

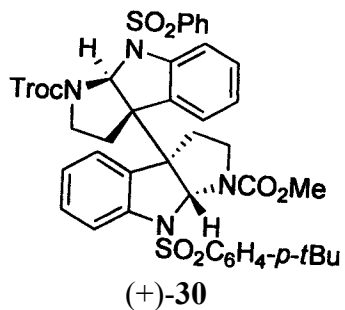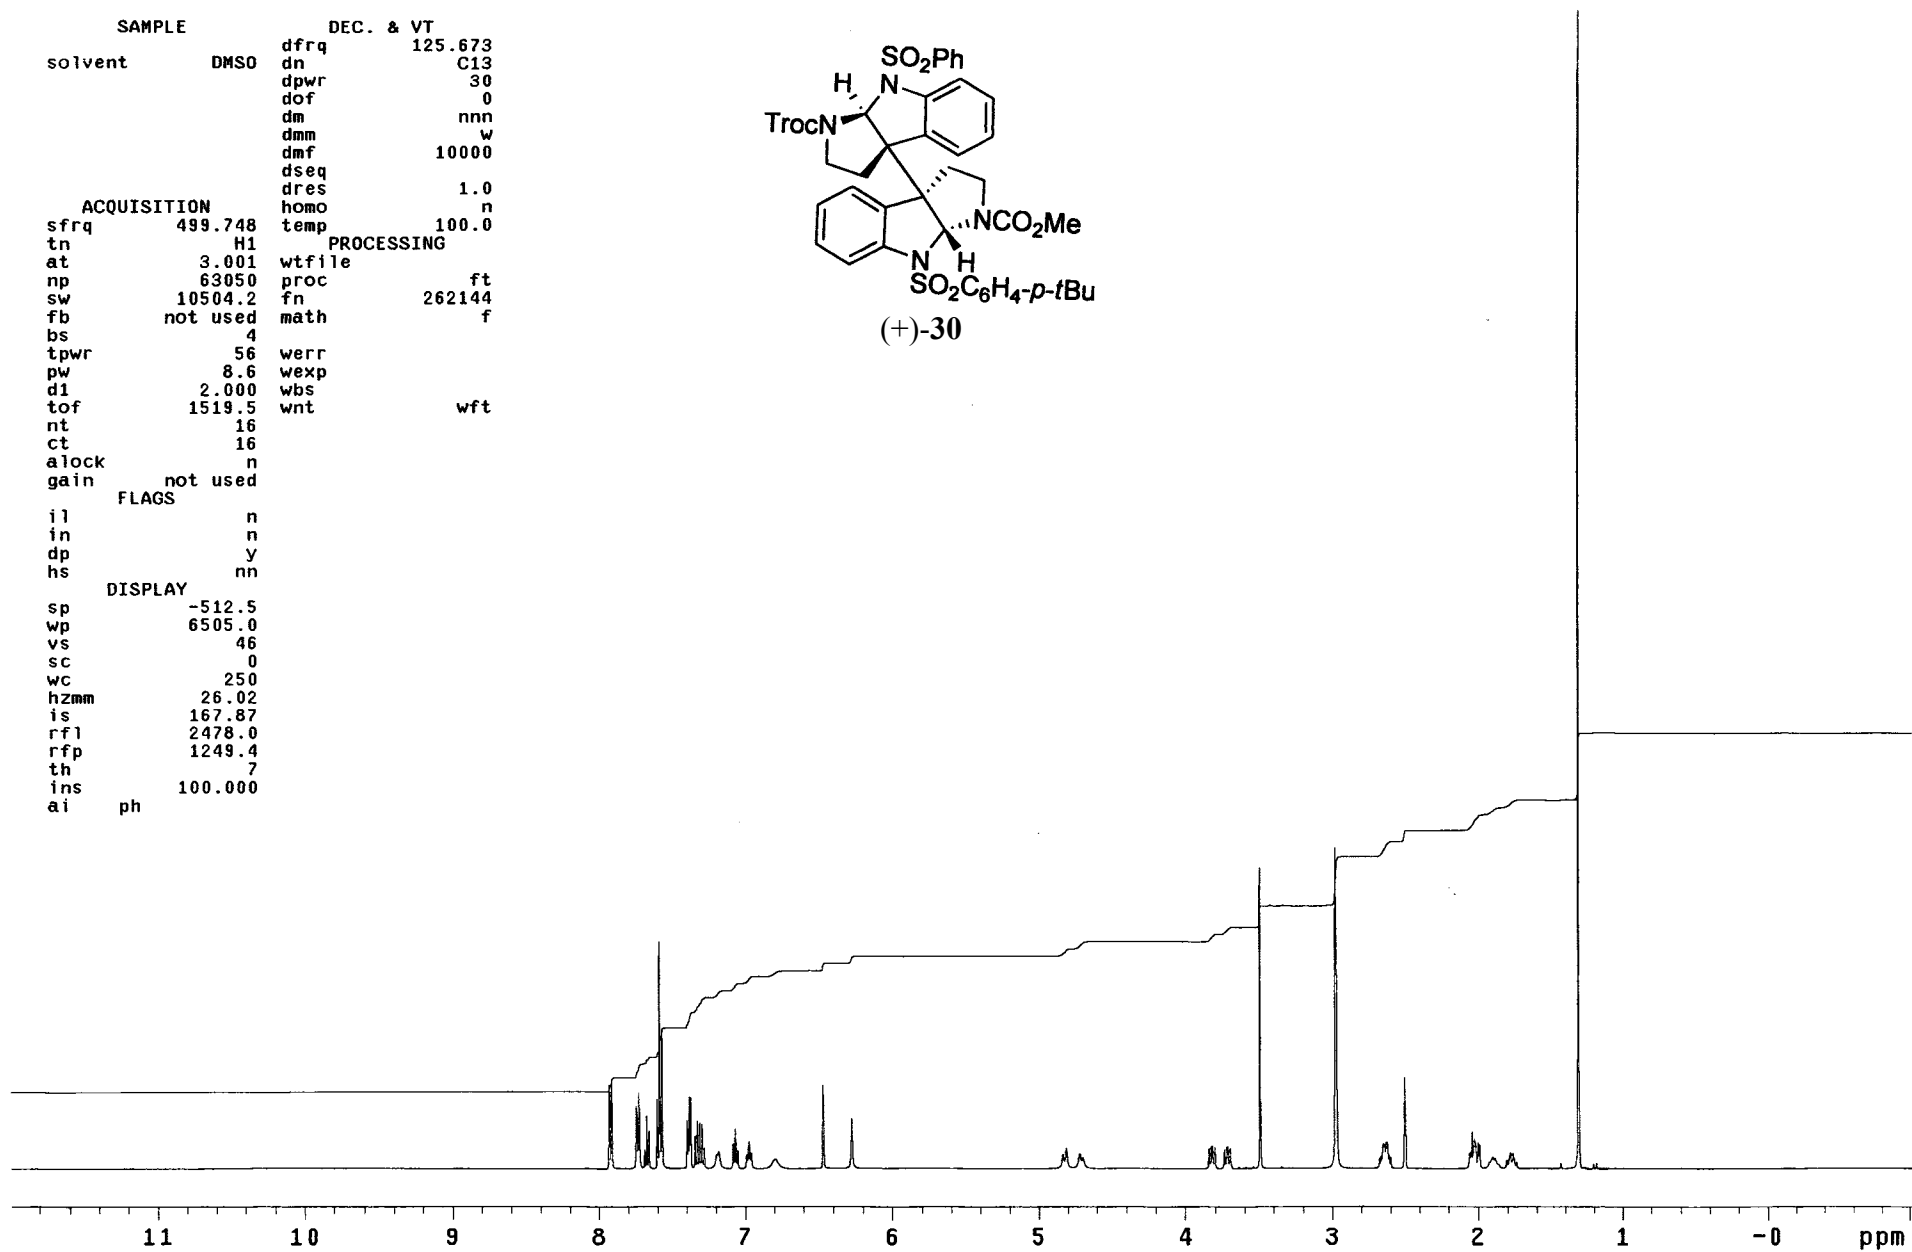

|             |          |            |         |
|-------------|----------|------------|---------|
| SAMPLE      |          | DEC. & VT  |         |
| solvent     | DMSO     | dfrq       | 500.232 |
|             |          | dn         | H1      |
|             |          | dpwr       | 38      |
|             |          | dof        | -500.0  |
|             |          | dm         | y       |
|             |          | dmm        | w       |
|             |          | dmf        | 10700   |
|             |          | dseq       |         |
|             |          | dres       | 1.0     |
|             |          | homo       | n       |
|             |          | temp       | 100.0   |
| ACQUISITION |          | PROCESSING |         |
| sfrq        | 125.795  | lb         | 0.30    |
| tn          | C13      | wtfile     |         |
| at          | 1.736    | proc       | ft      |
| np          | 131010   | fn         | 131072  |
| sw          | 37735.8  | math       | f       |
| fb          | not used |            |         |
| bs          | 32       |            |         |
| ss          | 1        |            |         |
| tpwr        | 59       | werr       |         |
| pw          | 6.9      | wexp       |         |
| d1          | 0.763    | wbs        |         |
| tof         | 631.4    | wnt        |         |
| nt          | 30000    |            |         |
| ct          | 17888    |            |         |
| alock       | n        |            |         |
| gain        | not used |            |         |
| FLAGS       |          |            |         |
| il          | n        |            |         |
| in          | n        |            |         |
| dp          | y        |            |         |
| hs          | nn       |            |         |
| DISPLAY     |          |            |         |
| sp          | -2533.0  |            |         |
| wp          | 30211.8  |            |         |
| vs          | 1060     |            |         |
| sc          | 0        |            |         |
| wc          | 250      |            |         |
| hzmm        | 120.85   |            |         |
| is          | 500.00   |            |         |
| rfl         | 11414.2  |            |         |
| rfp         | 4969.7   |            |         |
| th          | 20       |            |         |
| ins         | 1.000    |            |         |
| ai          | ph       |            |         |

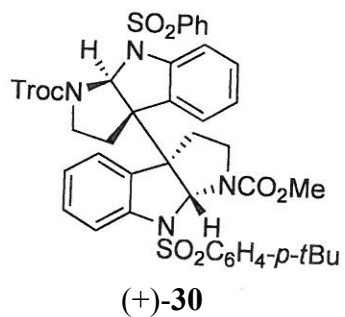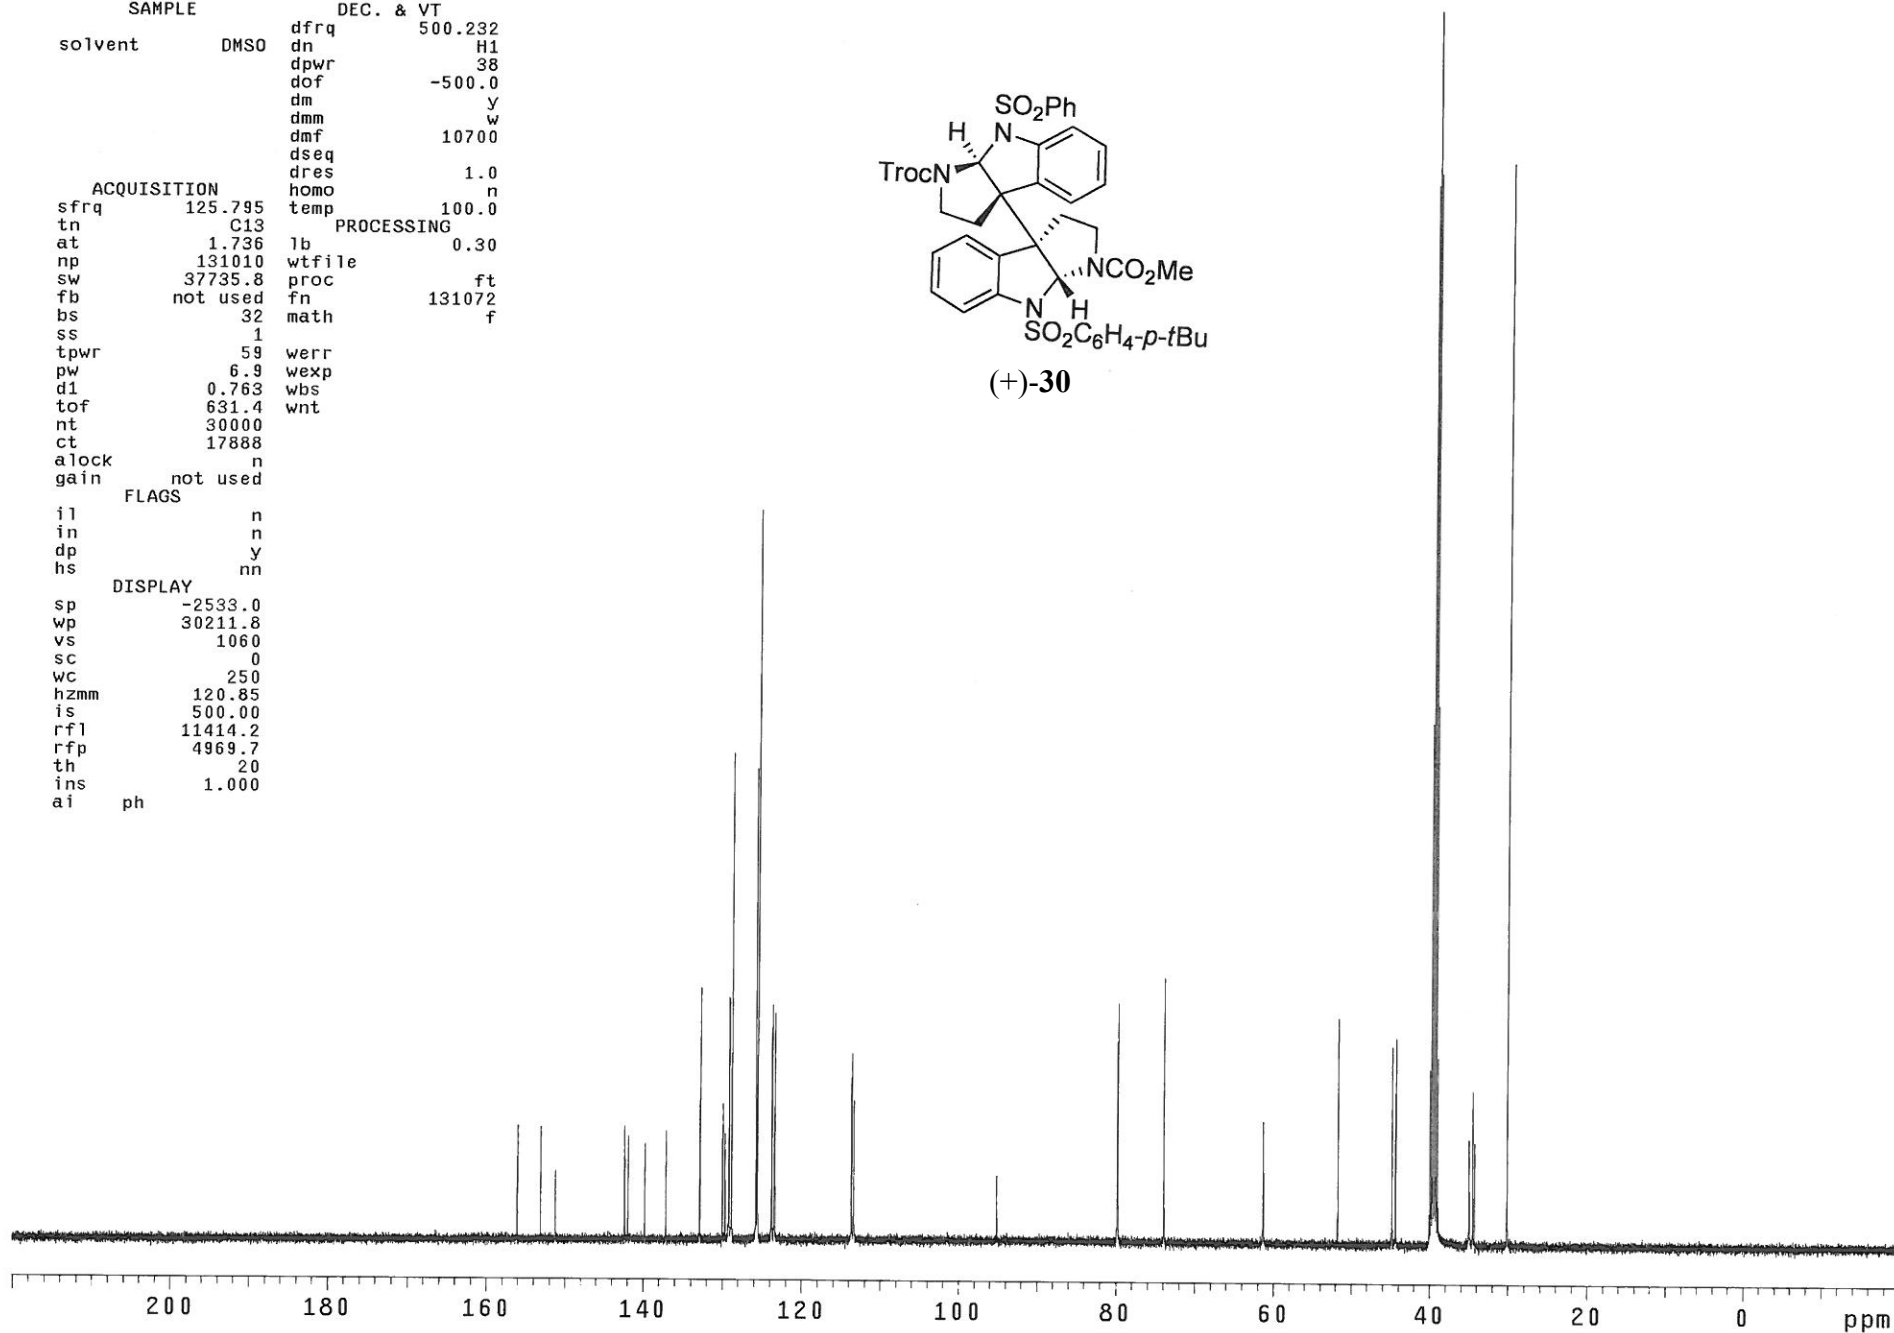

|             |          |            |         |
|-------------|----------|------------|---------|
| SAMPLE      |          | DEC. & VT  |         |
| solvent     | CD3CN    | dfrq       | 125.673 |
|             |          | dn         | C13     |
|             |          | dpwr       | 30      |
|             |          | dof        | 0       |
|             |          | dm         | nnn     |
|             |          | dmm        | w       |
|             |          | dmf        | 10000   |
|             |          | dseq       |         |
|             |          | dres       | 1.0     |
|             |          | homo       | n       |
|             |          | temp       | 70.0    |
| ACQUISITION |          | PROCESSING |         |
| sfrq        | 499.748  | wtfile     |         |
| tn          | H1       | proc       | ft      |
| at          | 3.001    | fn         | 262144  |
| np          | 63050    | math       | f       |
| sw          | 10504.2  |            |         |
| fb          | not used |            |         |
| bs          | 8        |            |         |
| tpwr        | 56       | werr       |         |
| pw          | 8.6      | wexp       |         |
| d1          | 2.000    | wbs        |         |
| tof         | 1519.5   | wnt        | wft     |
| nt          | 32       |            |         |
| ct          | 24       |            |         |
| alock       | n        |            |         |
| gain        | not used |            |         |
| FLAGS       |          |            |         |
| il          | n        |            |         |
| in          | n        |            |         |
| dp          | y        |            |         |
| hs          | nn       |            |         |
| DISPLAY     |          |            |         |
| sp          | -515.8   |            |         |
| wp          | 6500.6   |            |         |
| vs          | 55       |            |         |
| sc          | 0        |            |         |
| wc          | 250      |            |         |
| hzmm        | 26.00    |            |         |
| is          | 171.22   |            |         |
| rfl         | 2218.7   |            |         |
| rfp         | 969.5    |            |         |
| th          | 7        |            |         |
| ins         | 100.000  |            |         |
| ai          | ph       |            |         |

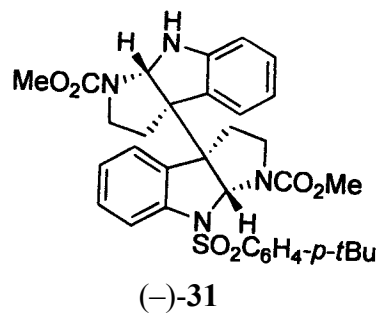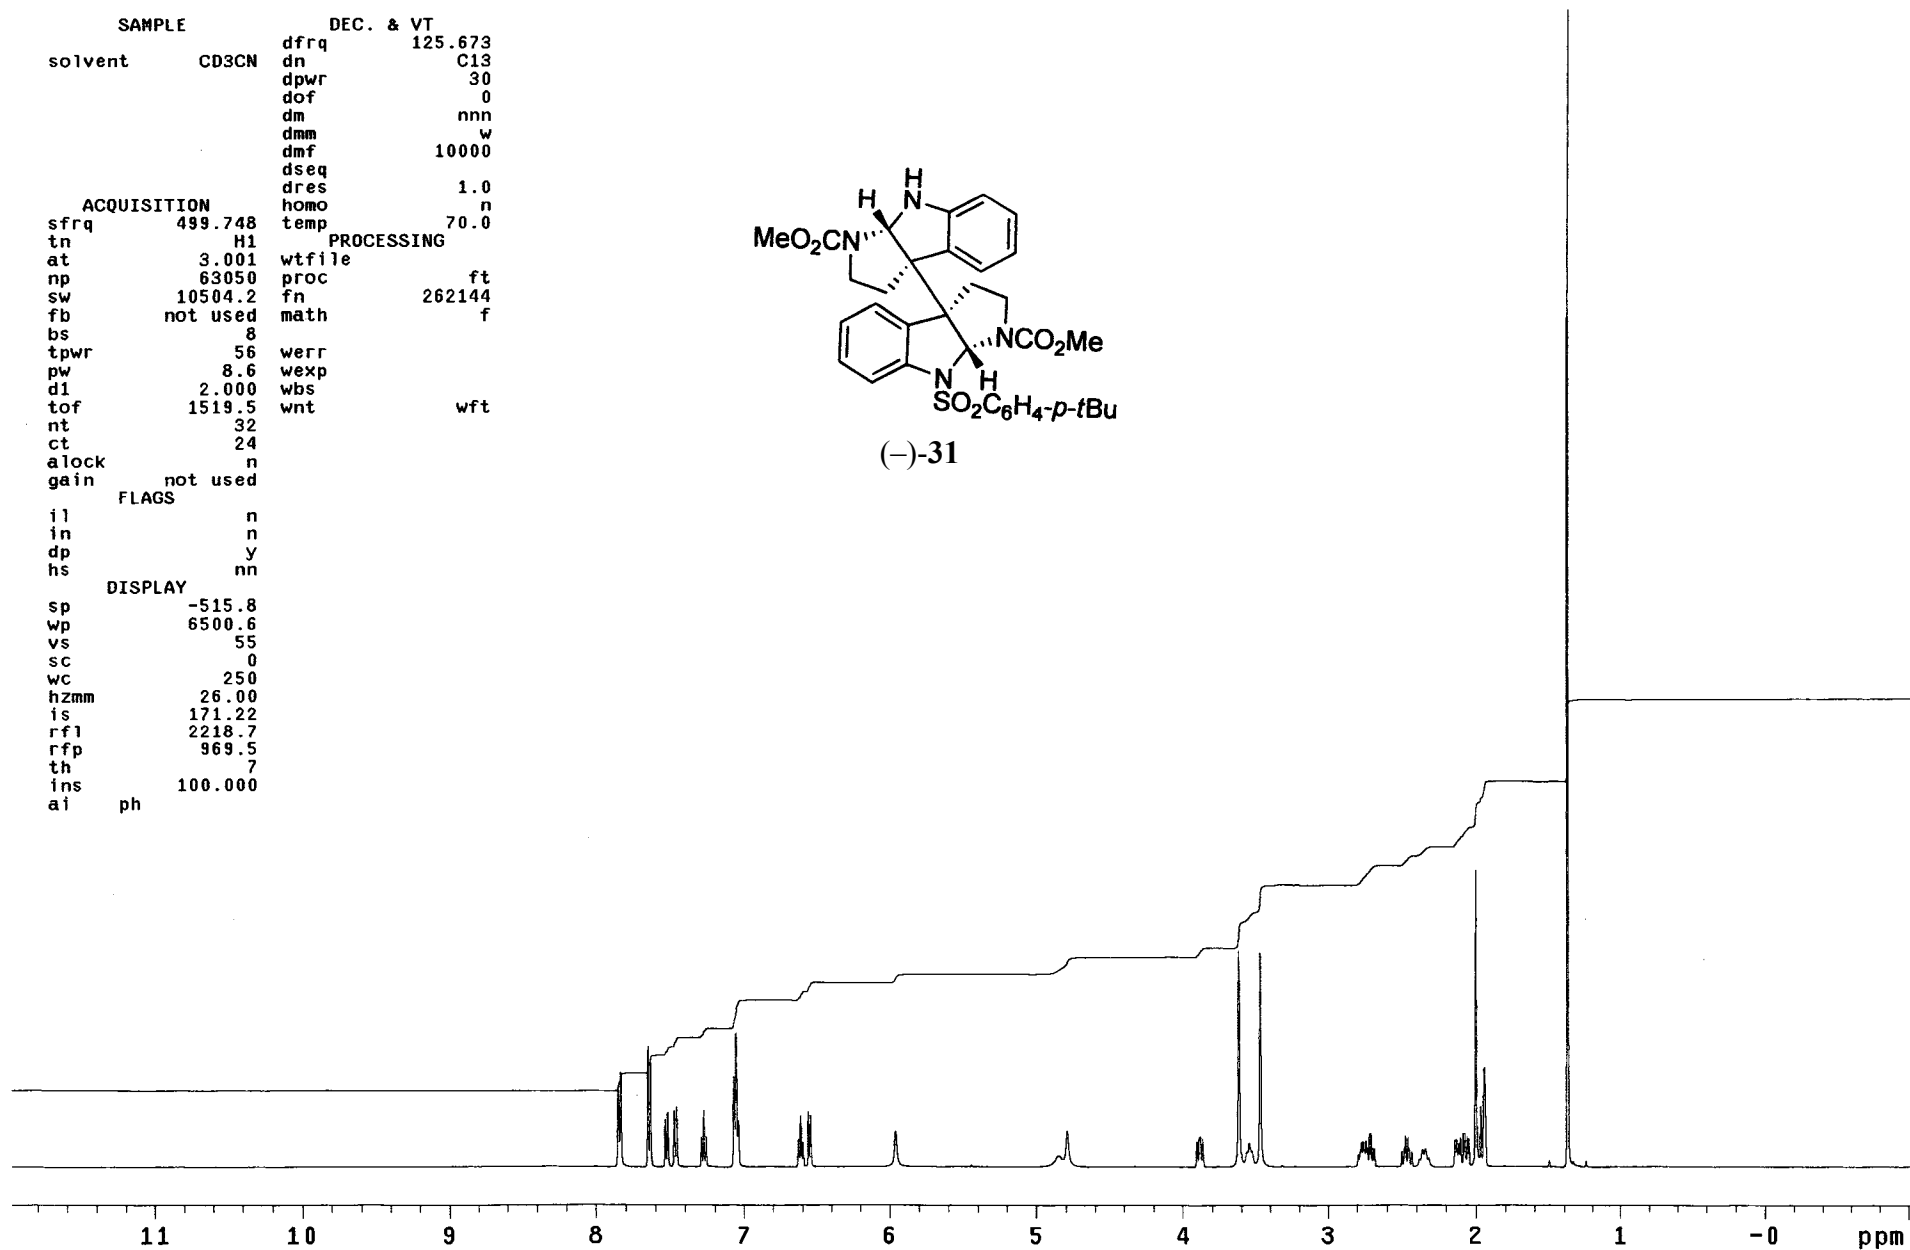



|             |          |            |         |
|-------------|----------|------------|---------|
| SAMPLE      |          | DEC. & VT  |         |
| solvent     | CD3CN    | dfrq       | 500.232 |
|             |          | dn         | H1      |
|             |          | dpwr       | 39      |
|             |          | dof        | -500.0  |
|             |          | dm         | y       |
|             |          | dmm        | w       |
|             |          | dmf        | 10000   |
|             |          | dseq       |         |
|             |          | dres       | 1.0     |
|             |          | homo       | n       |
|             |          | temp       | 70.0    |
| ACQUISITION |          | PROCESSING |         |
| sfrq        | 125.795  | lb         | 0.30    |
| tn          | C13      | wtfile     |         |
| at          | 1.736    | proc       | ft      |
| np          | 131010   | fn         | 131072  |
| sw          | 37735.8  | math       | f       |
| fb          | not used |            |         |
| bs          | 32       |            |         |
| ss          | 1        |            |         |
| tpwr        | 58       | werr       |         |
| pw          | 6.9      | wexp       |         |
| d1          | 0.763    | wbs        |         |
| tof         | 631.4    | wnt        |         |
| nt          | 20000    |            |         |
| ct          | 10528    |            |         |
| alock       | n        |            |         |
| gain        | not used |            |         |
| FLAGS       |          |            |         |
| il          | n        |            |         |
| in          | n        |            |         |
| dp          | y        |            |         |
| hs          | nn       |            |         |
| DISPLAY     |          |            |         |
| sp          | -2593.1  |            |         |
| wp          | 30294.7  |            |         |
| vs          | 193      |            |         |
| sc          | 0        |            |         |
| wc          | 250      |            |         |
| hzmm        | 121.18   |            |         |
| is          | 500.00   |            |         |
| rfl         | 21011.1  |            |         |
| rfp         | 14929.1  |            |         |
| th          | 20       |            |         |
| ins         | 1.000    |            |         |
| ai          | ph       |            |         |

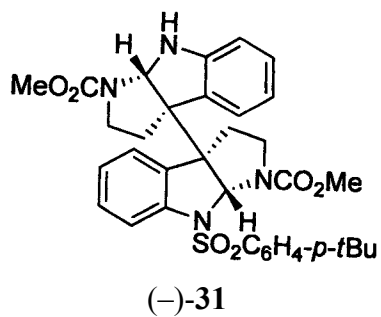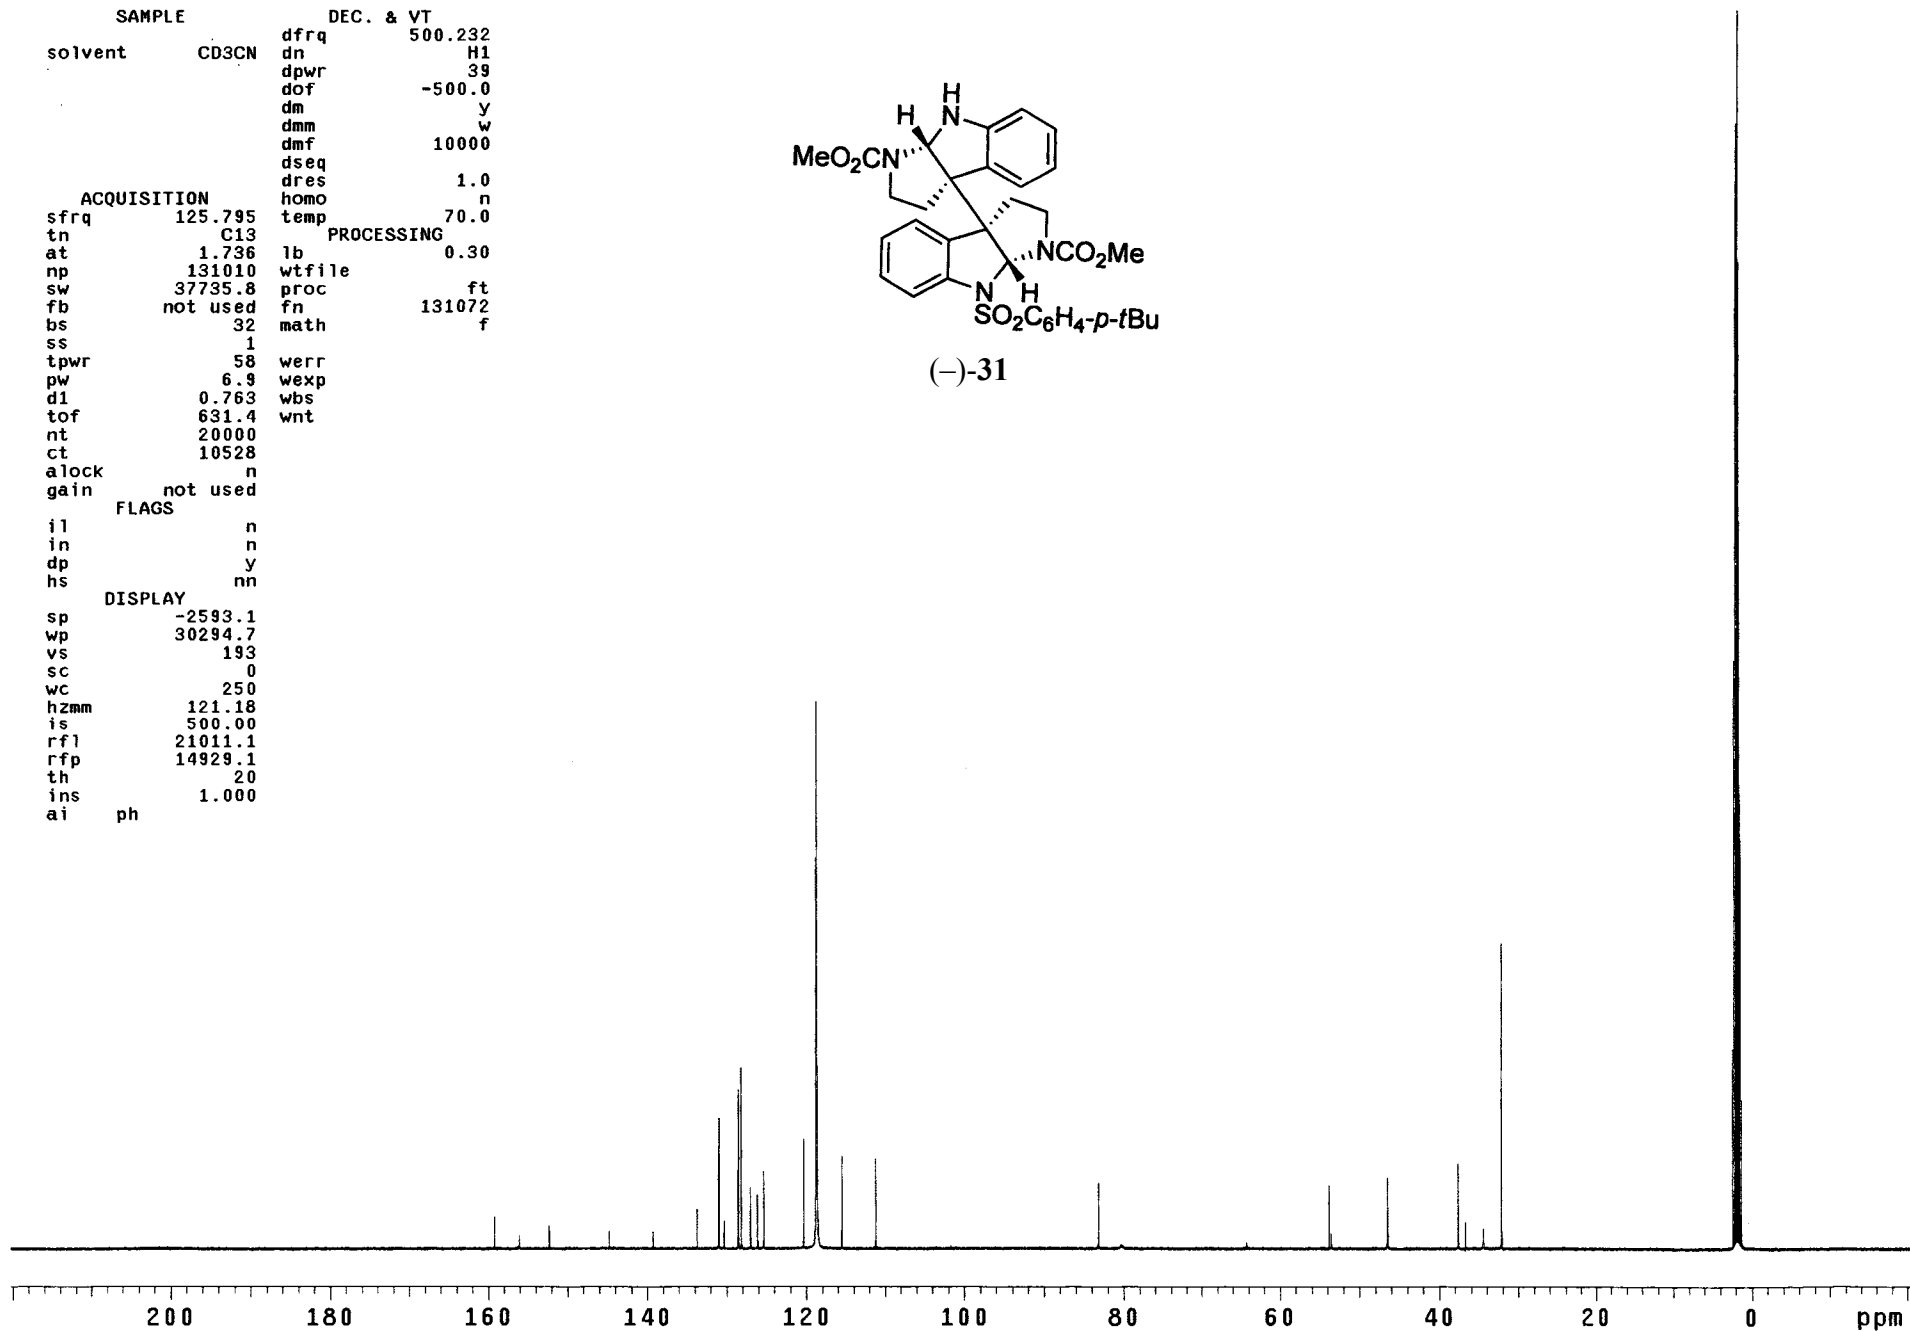

|             |          |            |         |
|-------------|----------|------------|---------|
| SAMPLE      |          | DEC. & VT  |         |
| solvent     | CD3CN    | dfrq       | 125.673 |
|             |          | dn         | C13     |
|             |          | dpwr       | 30      |
|             |          | dof        | 0       |
|             |          | dm         | nnn     |
|             |          | dmm        | w       |
|             |          | dmf        | 10000   |
|             |          | dseq       |         |
|             |          | dres       | 1.0     |
|             |          | homo       | n       |
|             |          | temp       | 70.0    |
| ACQUISITION |          | PROCESSING |         |
| sfrq        | 499.748  | wtfile     | ft      |
| tn          | H1       | proc       | 262144  |
| at          | 3.001    | fn         | f       |
| np          | 63050    | math       |         |
| sw          | 10504.2  |            |         |
| fb          | not used |            |         |
| bs          | 4        |            |         |
| tpwr        | 56       | werr       |         |
| pw          | 8.6      | wexp       |         |
| d1          | 2.000    | wbs        |         |
| tof         | 1519.5   | wnt        | wft     |
| nt          | 16       |            |         |
| ct          | 16       |            |         |
| alock       | n        |            |         |
| gain        | not used |            |         |
| FLAGS       |          |            |         |
| il          | n        |            |         |
| in          | n        |            |         |
| dp          | y        |            |         |
| hs          | nn       |            |         |
| DISPLAY     |          |            |         |
| sp          | -496.1   |            |         |
| wp          | 6490.7   |            |         |
| vs          | 75       |            |         |
| sc          | 0        |            |         |
| wc          | 250      |            |         |
| hzmm        | 25.96    |            |         |
| is          | 142.12   |            |         |
| rfl         | 2218.8   |            |         |
| rfp         | 969.5    |            |         |
| th          | 7        |            |         |
| ins         | 100.000  |            |         |
| ai          | ph       |            |         |

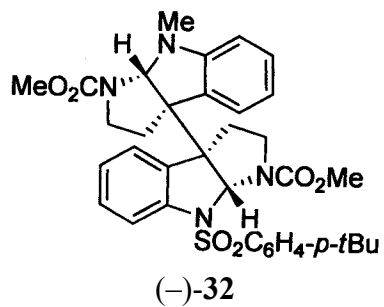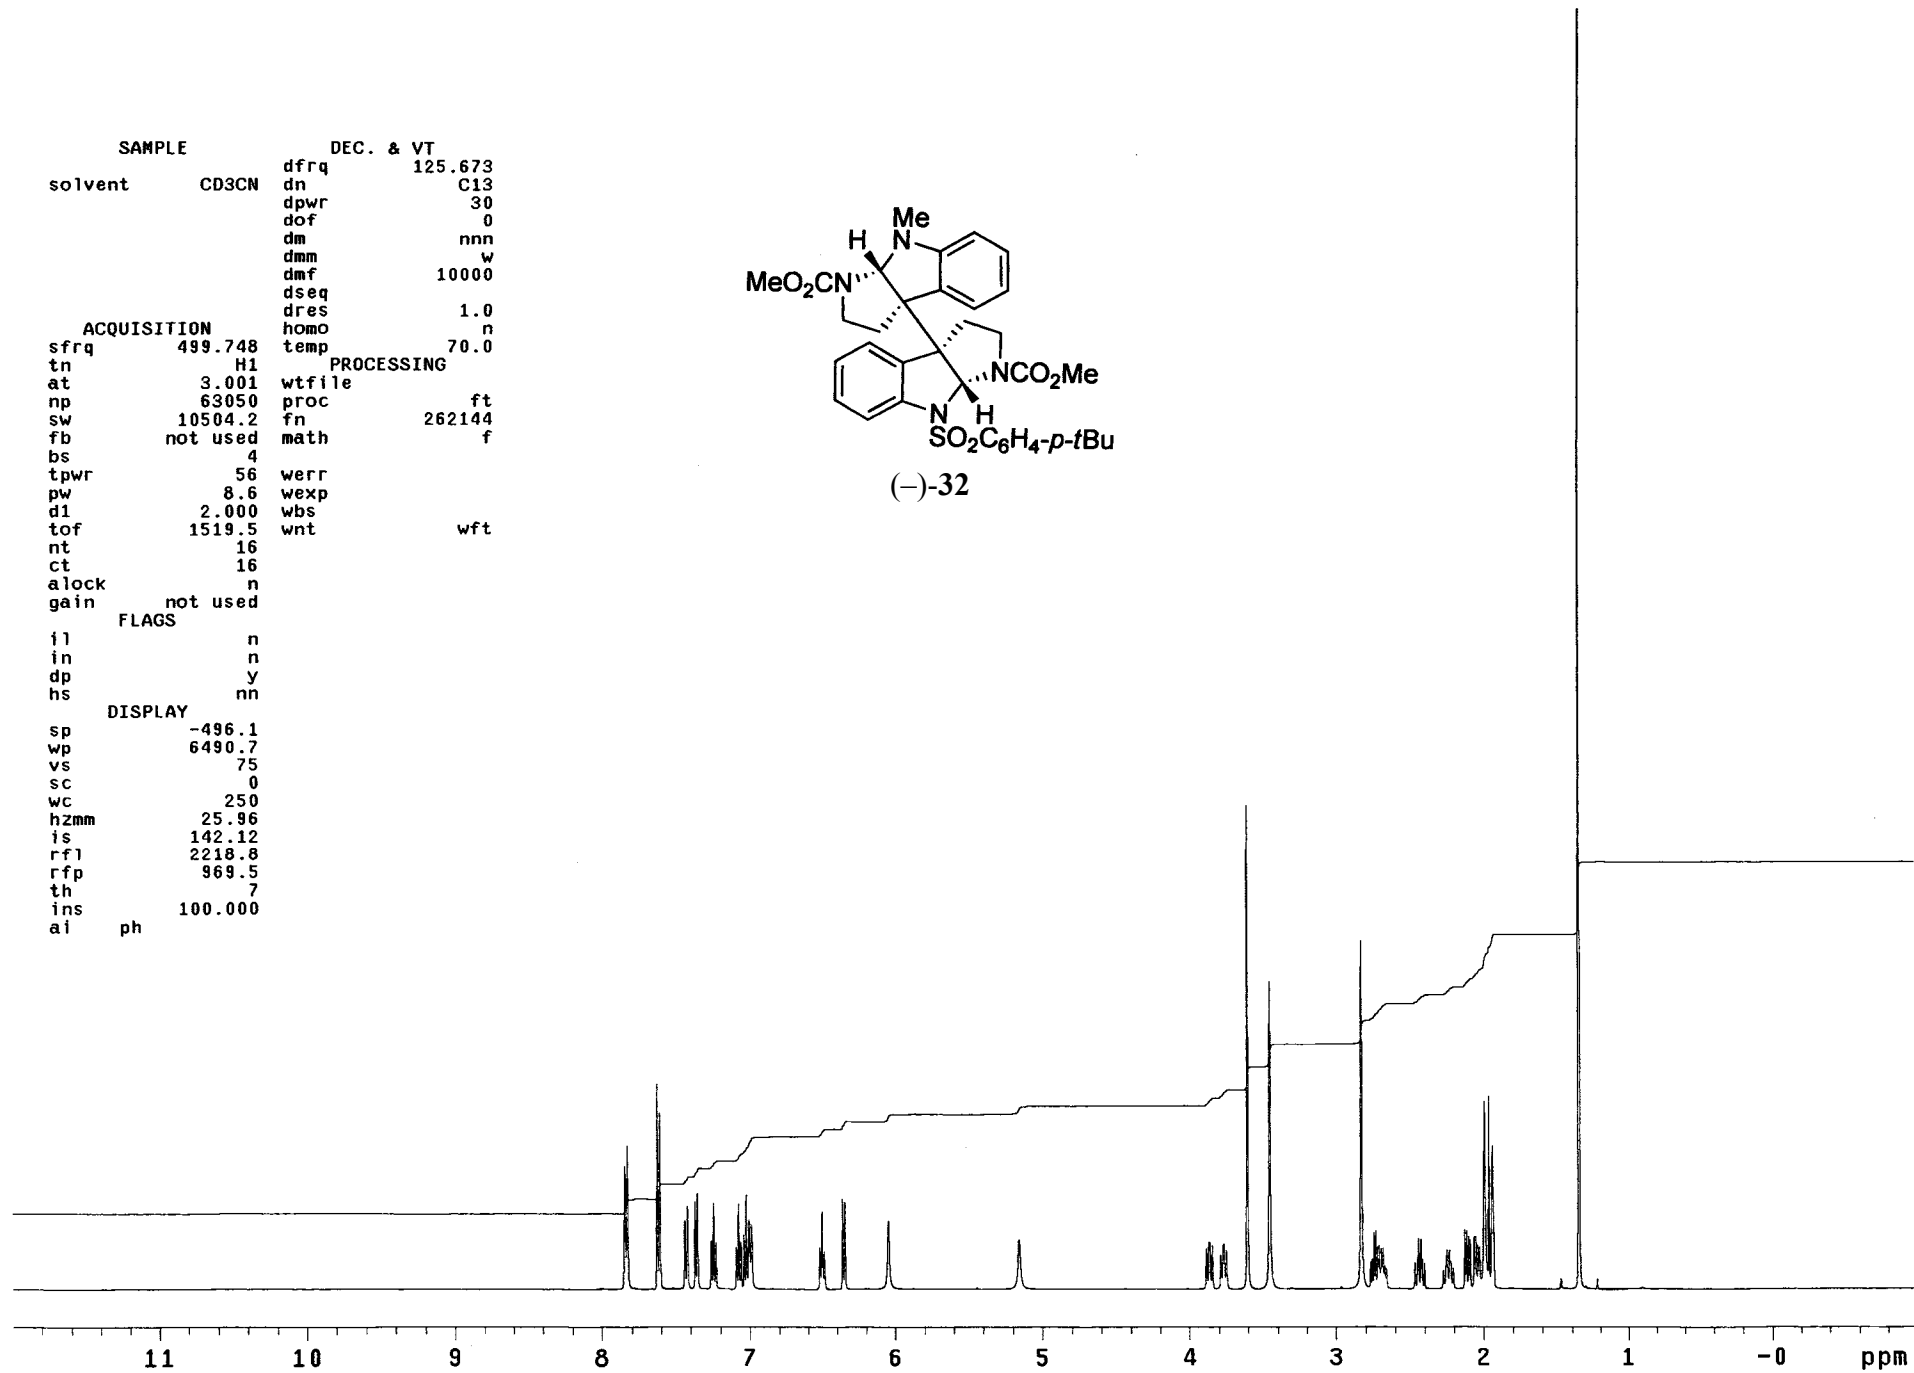

|             |          |            |         |
|-------------|----------|------------|---------|
| SAMPLE      |          | DEC. & VT  |         |
| solvent     | CD3CN    | dfrq       | 500.232 |
|             |          | dn         | H1      |
|             |          | dpwr       | 39      |
|             |          | dof        | -500.0  |
|             |          | dm         | y       |
|             |          | dmm        | w       |
|             |          | dmf        | 10000   |
|             |          | dseq       |         |
|             |          | dres       | 1.0     |
|             |          | homo       | n       |
|             |          | temp       | 70.0    |
| ACQUISITION |          | PROCESSING |         |
| sfrq        | 125.795  | lb         | 0.30    |
| tn          | C13      | wtfile     |         |
| at          | 1.736    | proc       | ft      |
| np          | 131010   | fn         | 131072  |
| sw          | 37735.8  | math       | f       |
| fb          | not used |            |         |
| bs          | 64       | werr       |         |
| ss          | 1        | wexp       |         |
| tpwr        | 58       | wbs        |         |
| pw          | 6.8      | wnt        |         |
| d1          | 0.763    |            |         |
| tof         | 631.4    |            |         |
| nt          | 20000    |            |         |
| ct          | 18880    |            |         |
| alock       | n        |            |         |
| gain        | not used |            |         |
| FLAGS       |          |            |         |
| il          | n        |            |         |
| in          | n        |            |         |
| dp          | y        |            |         |
| hs          | nn       |            |         |
| DISPLAY     |          |            |         |
| sp          | -2560.9  |            |         |
| wp          | 30234.3  |            |         |
| vs          | 801      |            |         |
| sc          | 0        |            |         |
| wc          | 250      |            |         |
| hzmm        | 120.94   |            |         |
| is          | 500.00   |            |         |
| rfl         | 21010.5  |            |         |
| rfp         | 14929.1  |            |         |
| th          | 20       |            |         |
| ins         | 1.000    |            |         |
| ai          | ph       |            |         |

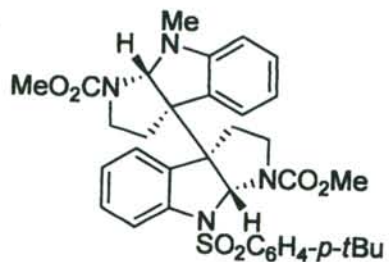

(-)-32

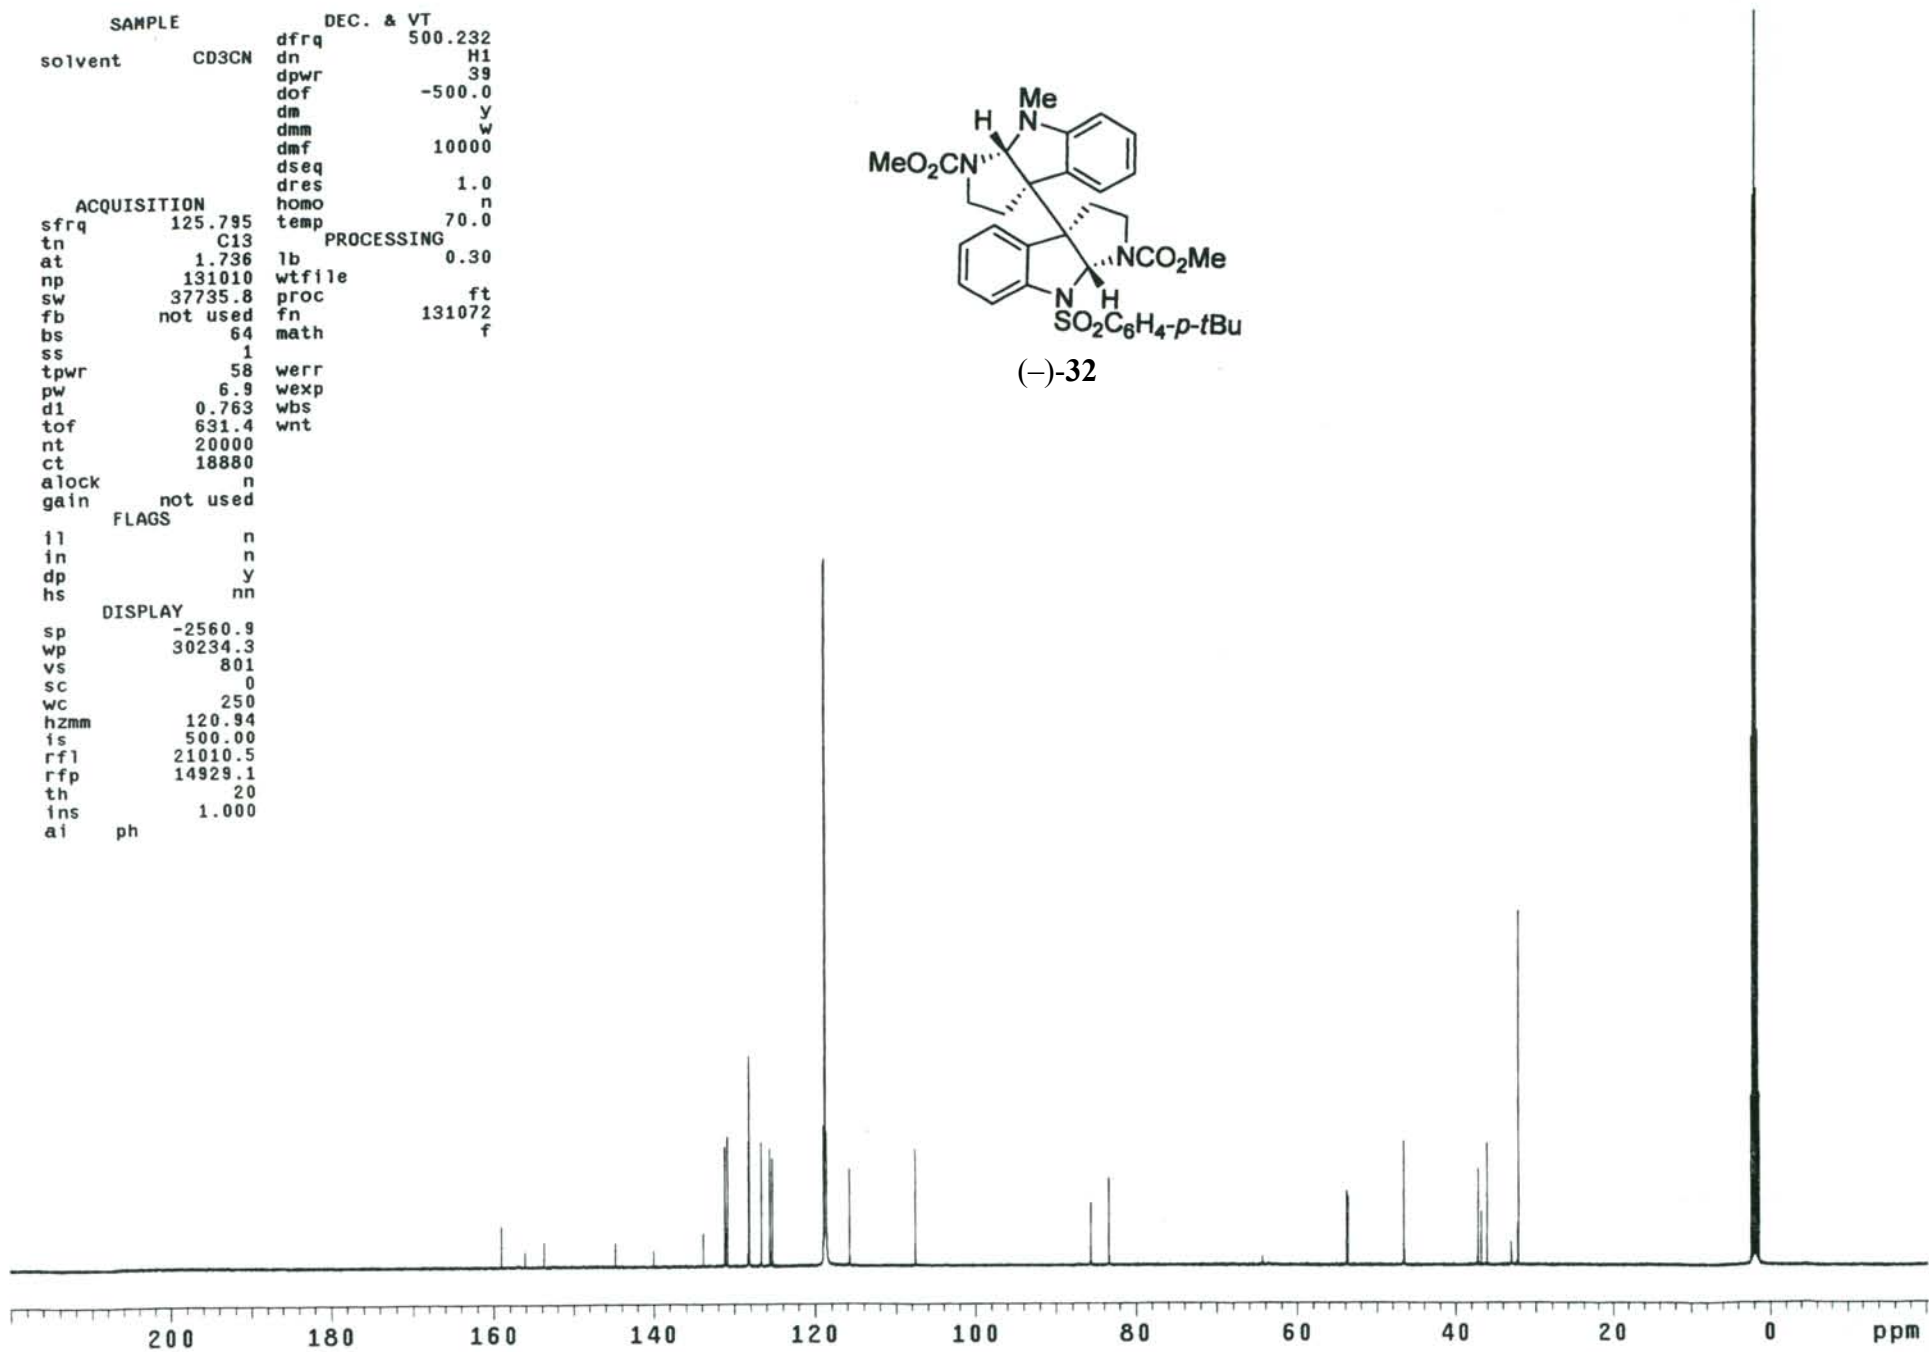

| SAMPLE      |          | DEC. & VT  |         |
|-------------|----------|------------|---------|
| solvent     | CD3CN    | dfrq       | 125.673 |
|             |          | dn         | C13     |
|             |          | dpwr       | 30      |
|             |          | dof        | 0       |
|             |          | dm         | nnn     |
|             |          | dmm        | w       |
|             |          | dmf        | 10000   |
|             |          | dseq       |         |
|             |          | dres       | 1.0     |
|             |          | homo       | n       |
|             |          | temp       | 70.0    |
| ACQUISITION |          | PROCESSING |         |
| sfrq        | 499.748  | wtfile     | ft      |
| tn          | H1       | proc       | 262144  |
| at          | 3.001    | math       | f       |
| np          | 63050    | werr       |         |
| sw          | 10504.2  | wexp       |         |
| fb          | not used | wbs        |         |
| bs          | 4        | wnt        | wft     |
| tpwr        | 56       |            |         |
| pw          | 8.6      |            |         |
| d1          | 2.000    |            |         |
| tof         | 1519.5   |            |         |
| nt          | 16       |            |         |
| ct          | 16       |            |         |
| alock       | n        |            |         |
| gain        | not used |            |         |
| FLAGS       |          |            |         |
| il          | n        |            |         |
| in          | n        |            |         |
| dp          | y        |            |         |
| hs          | nn       |            |         |
| DISPLAY     |          |            |         |
| sp          | -498.0   |            |         |
| wp          | 6492.9   |            |         |
| vs          | 45       |            |         |
| sc          | 0        |            |         |
| wc          | 250      |            |         |
| hzmm        | 25.97    |            |         |
| is          | 152.95   |            |         |
| rfl         | 2218.5   |            |         |
| rfp         | 969.5    |            |         |
| th          | 7        |            |         |
| ins         | 100.000  |            |         |
| ai          | ph       |            |         |

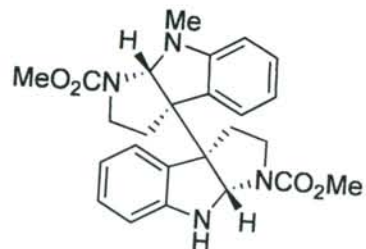

(-)-33

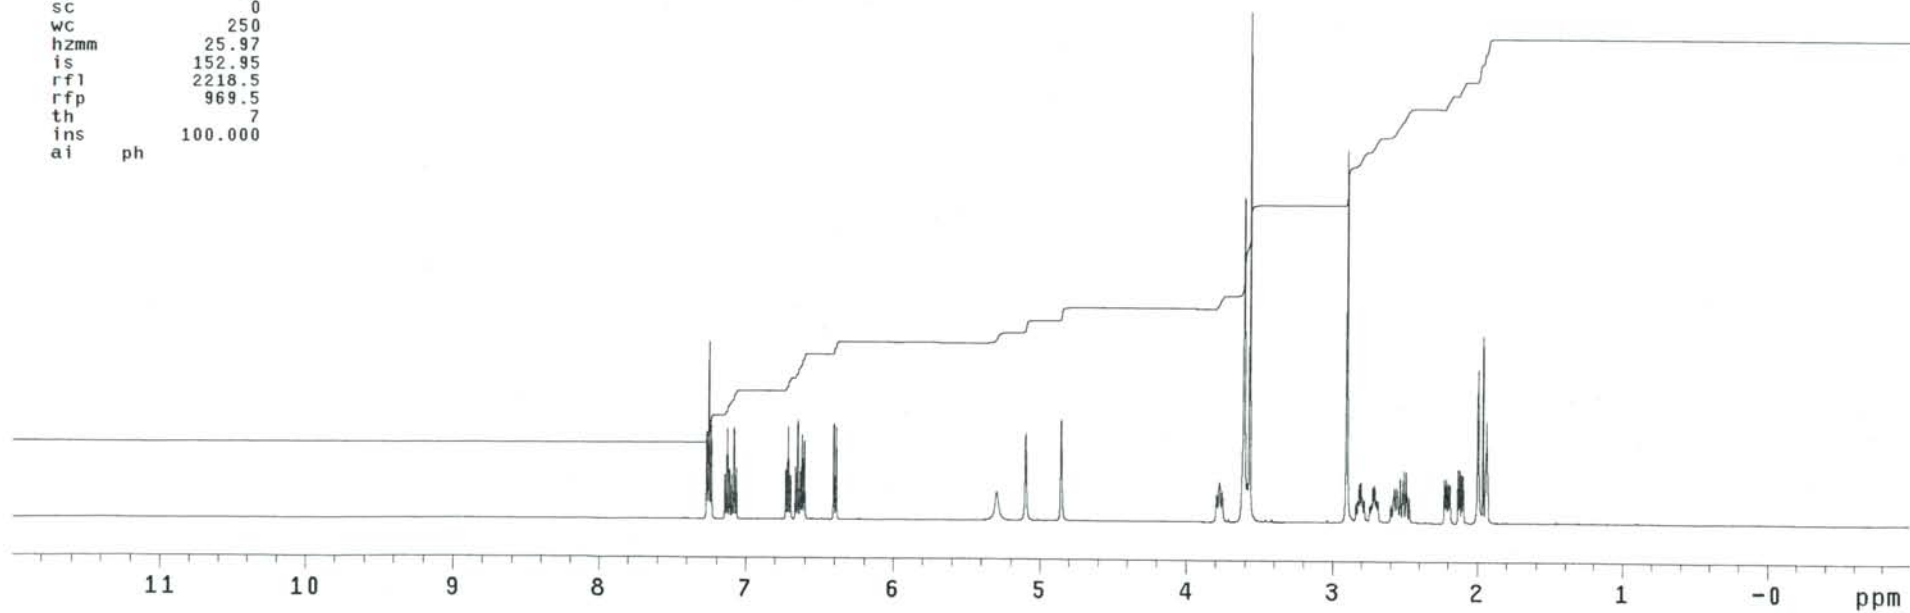

|             |          |            |         |
|-------------|----------|------------|---------|
| SAMPLE      |          | DEC. & VT  |         |
| solvent     | CD3CN    | dfrq       | 500.232 |
|             |          | dn         | H1      |
|             |          | dpwr       | 39      |
|             |          | dof        | -500.0  |
|             |          | dm         | y       |
|             |          | dmm        | w       |
|             |          | dmf        | 10000   |
|             |          | dseq       |         |
|             |          | dres       | 1.0     |
|             |          | homo       | n       |
|             |          | temp       | 70.0    |
| ACQUISITION |          | PROCESSING |         |
| sfrq        | 125.795  | lb         | 0.30    |
| tn          | C13      | wtfile     |         |
| at          | 1.736    | proc       | ft      |
| np          | 131010   | fn         | 131072  |
| sw          | 37735.8  | math       | f       |
| fb          | not used |            |         |
| bs          | 64       |            |         |
| ss          | 1        |            |         |
| tpwr        | 58       | werr       |         |
| pw          | 6.9      | wexp       |         |
| d1          | 0.763    | wbs        |         |
| tof         | 631.4    | wnt        |         |
| nt          | 25000    |            |         |
| ct          | 18112    |            |         |
| alock       | n        |            |         |
| gain        | not used |            |         |
| FLAGS       |          |            |         |
| il          | n        |            |         |
| in          | n        |            |         |
| dp          | y        |            |         |
| hs          | nn       |            |         |
| DISPLAY     |          |            |         |
| sp          | -2561.5  |            |         |
| wp          | 30234.3  |            |         |
| vs          | 814      |            |         |
| sc          | 0        |            |         |
| wc          | 250      |            |         |
| hzmm        | 120.94   |            |         |
| is          | 500.00   |            |         |
| rfl         | 21011.1  |            |         |
| rfp         | 14929.1  |            |         |
| th          | 20       |            |         |
| ins         | 1.000    |            |         |
| ai          | ph       |            |         |

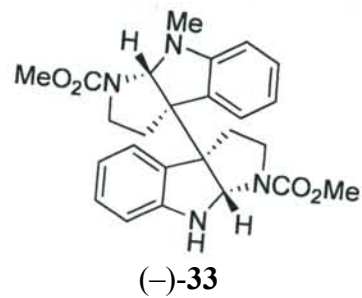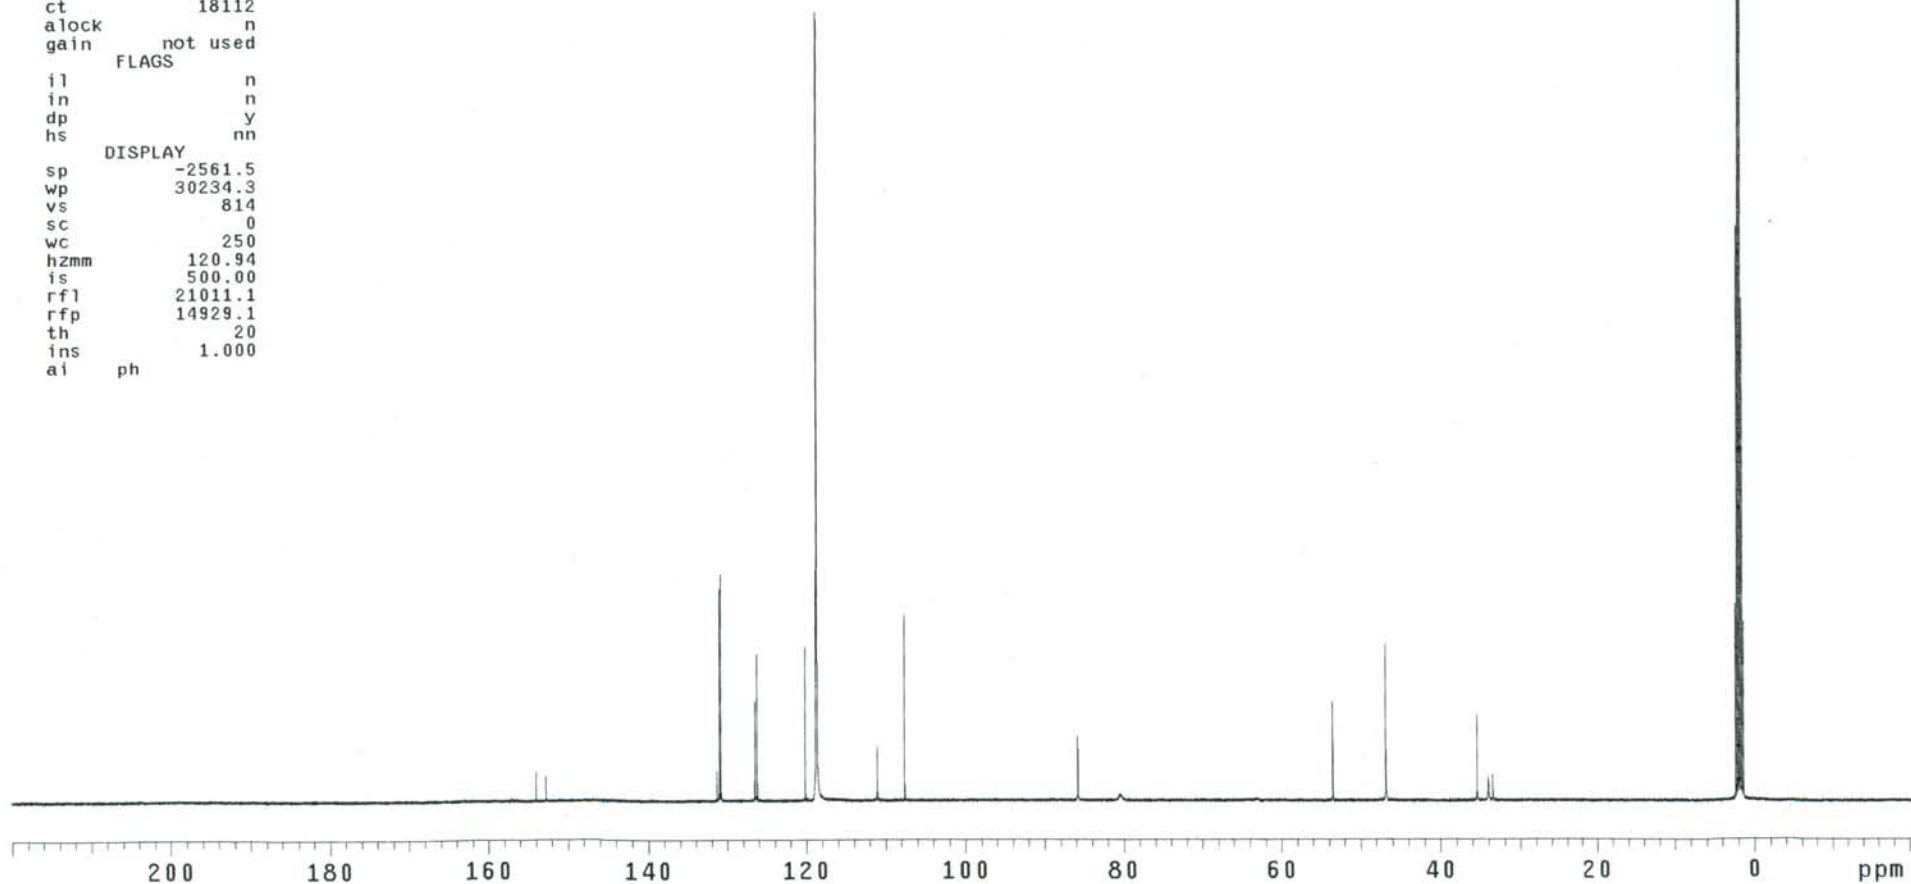

```
SAMPLE          DEC. & VT
solvent          CDC13  dfrq      125.672
                  dn        C13
                  dpwr      30
                  dof        0
                  dm         nnn
                  dmm        w
                  dmf        10000
ACQUISITION     dseq
sfrq            499.746  dres      1.0
tn              H1      homo      n
at              3.001    temp     50.0
np              63050
sw              10504.2  wtfile
fb              not used  proc
bs              4        fn        262144
tpwr            56      math
pw              8.6
d1              2.000    werr
tof             1519.5    wexp
nt              16      wbs
ct              16      wnt
alock           n
gain            not used
                FLAGS
il              n
in              n
dp              y
hs              nn
DISPLAY
sp              -509.4
wp              6499.7
vs              45
sc              0
wc              250
hzmm            26.00
is              218.23
rfl             4864.9
rfp             3618.1
th              7
ins            100.000
ai              ph
```

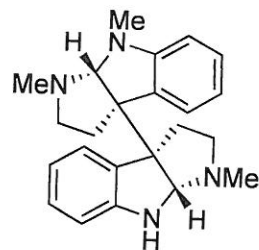

(-)-calycanthidine (**1**)

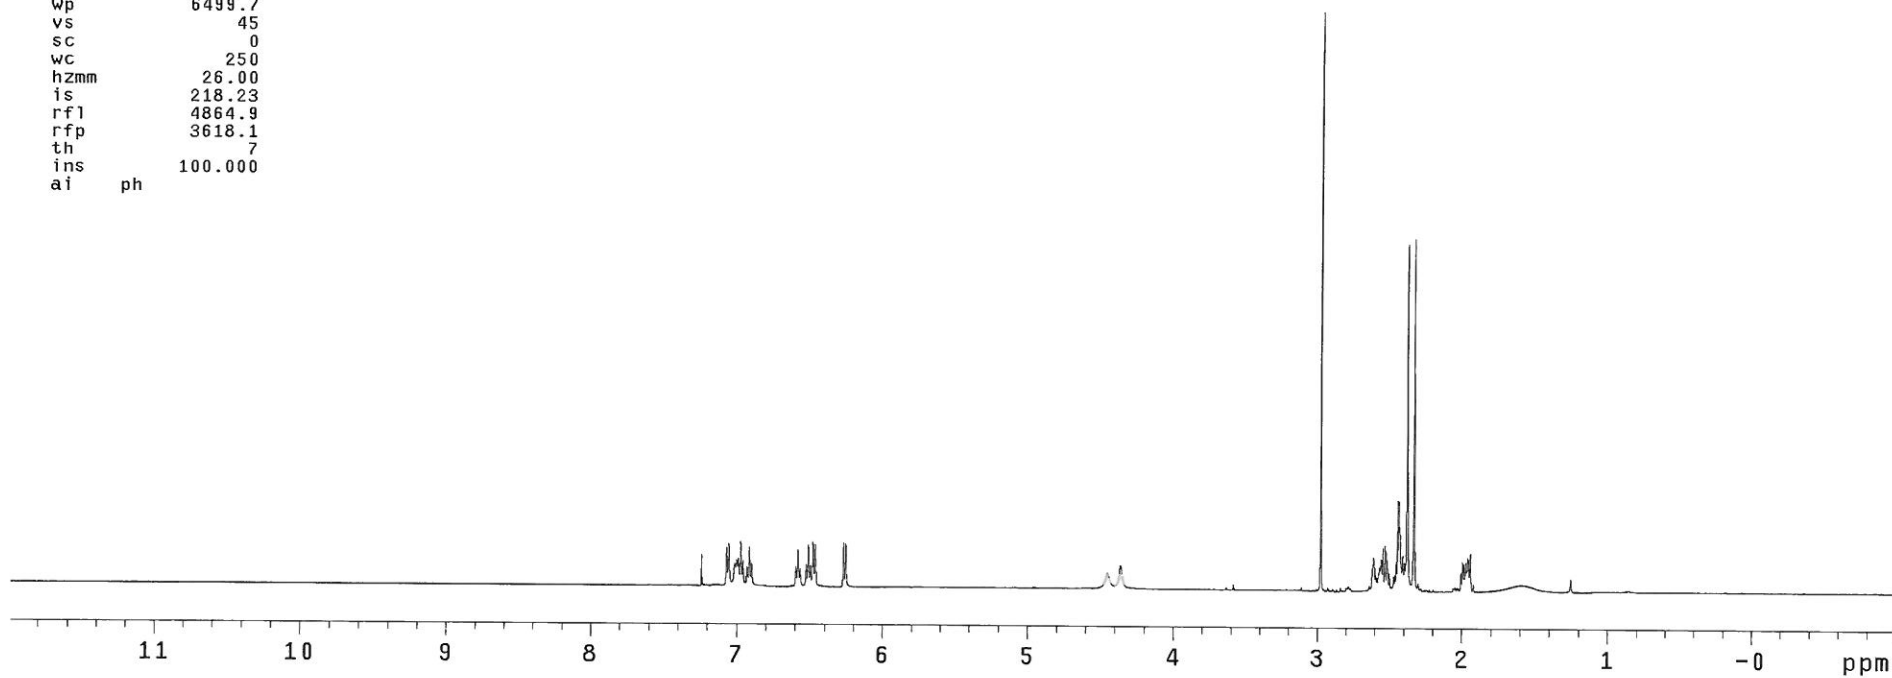

```
SAMPLE          DEC. & VT
solvent         CDC13    dfrq      500.229
                  dn       H1
                  dpwr      39
                  dof      -500.0
                  dm        y
                  dmm       w
ACQUISITION     dmf      10000
sfrq           125.795  dseq
tn             C13     dres      1.0
at            1.736   homo       n
np           131010   temp      50.0
sw           37735.8  PROCESSING
fb           not used  lb        0.30
bs            64     wtfile
ss            1     proc
tpwr          58     fn       131072
pw            6.9    math
d1            0.763  werr
tof           631.4  wexp
nt           25000   wbs
ct           21696   wnt
alock         not used
gain          not used
FLAGS
il            n
in            n
dp            y
hs            nn
DISPLAY
sp           -2578.7
wp           28957.7
vs           2712
sc            0
wc            250
hzmm         115.83
is            500.00
rf1          15988.9
rfp          9714.2
th            20
ins          1.000
ai           ph
```

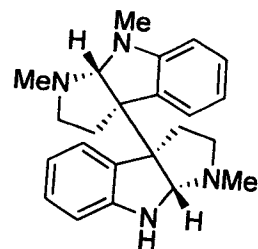

(-)-calycanthidine (1)

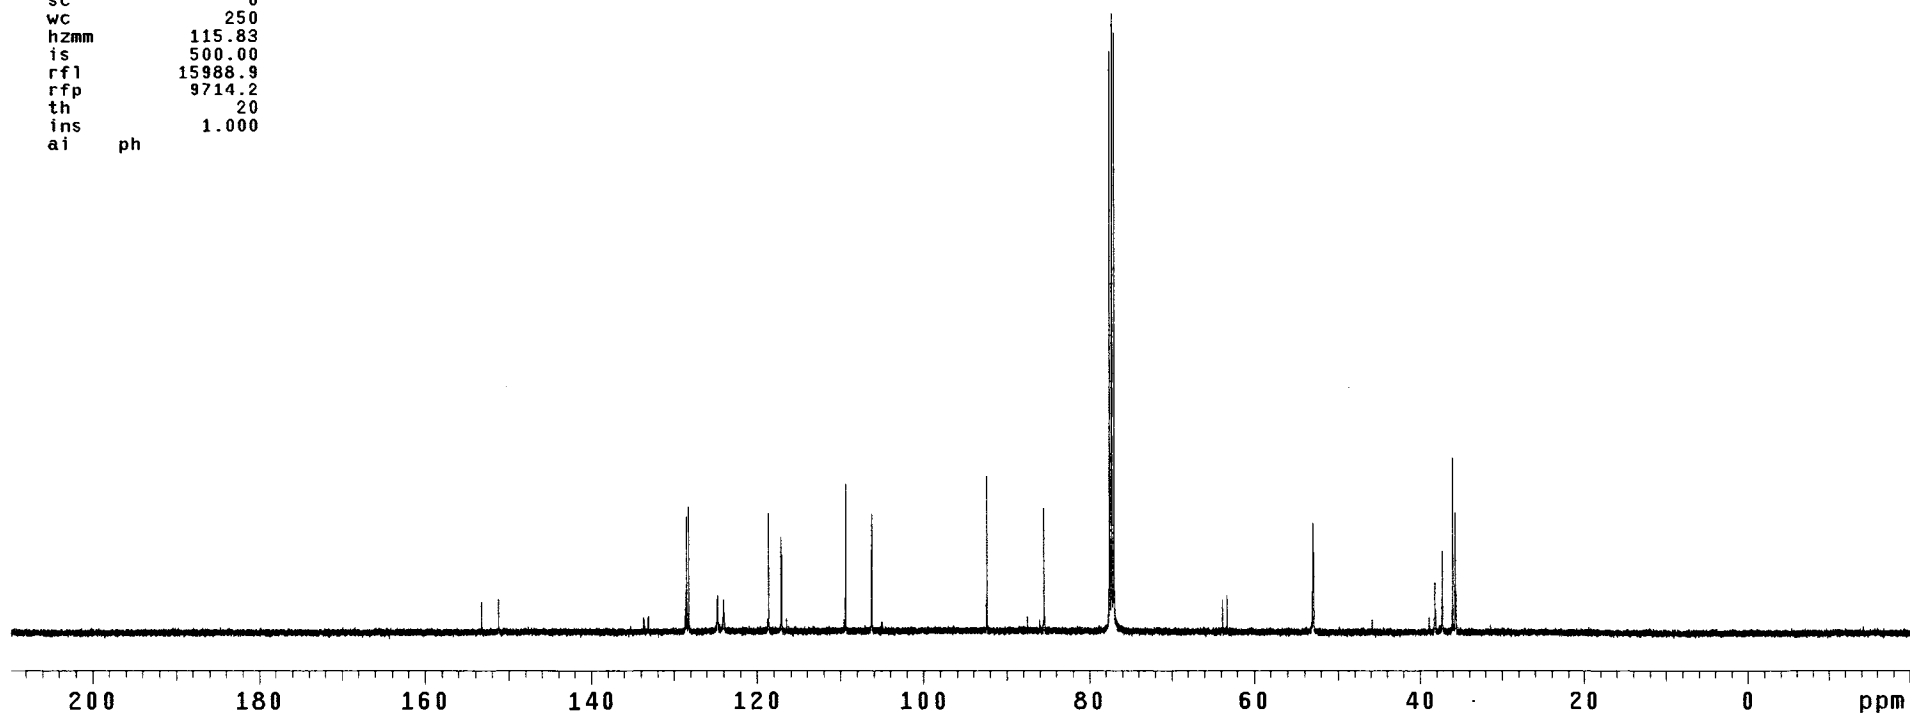

```
SAMPLE          DEC. & VT
solvent         DMSO    dfrq      125.673
                  dn      C13
                  dpwr     30
                  dof      0
                  dm       nnn
                  dmm      w
ACQUISITION     dmf      10000
sfrq           499.748 dseq
tn             H1      dres     1.0
at            3.001   homo     n
np            63050   temp    100.0
sw            10504.2
fb            not used
bs            4       wfile
tpwr          56     proc      ft
pw            8.6    fn       262144
d1            2.000  math     f
tof           1519.5 werr
nt            16     wexp
ct            16     wbs
alock         n      wnt      wft
gain          not used
                FLAGS
il            n
in            n
dp            y
hs            nn
                DISPLAY
sp           -505.7
wp           6501.7
vs            51
sc            0
wc            250
hzmm         26.01
is            109.11
rf1          2478.4
rfp          1249.4
th            7
ins          100.000
ai           ph
```

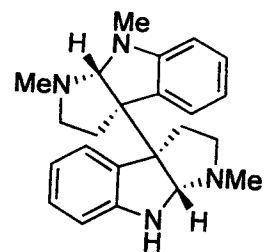

(-)-calycanthidine (1)

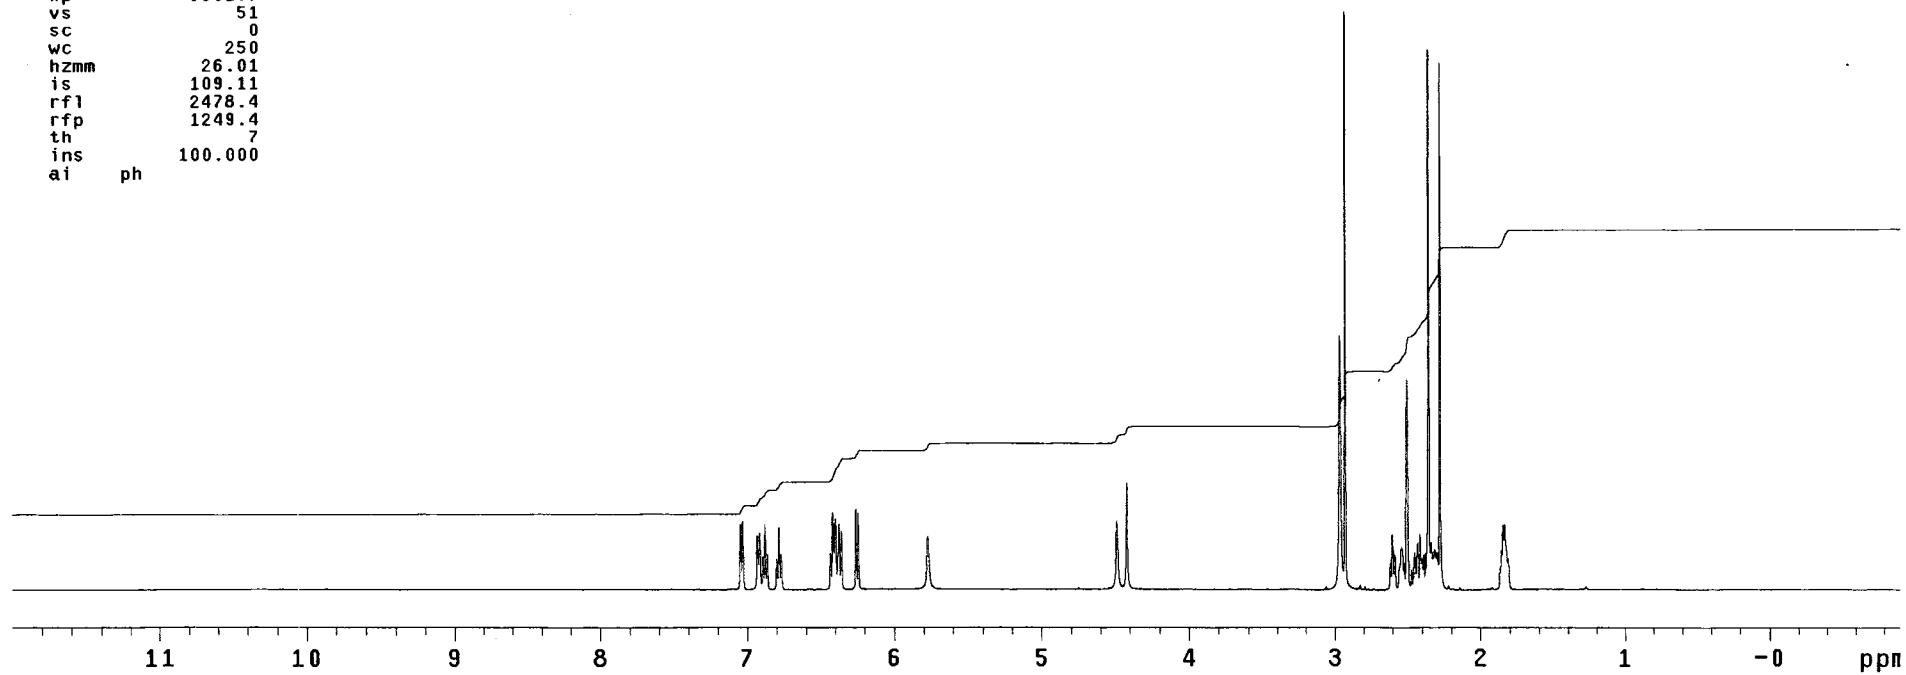



```
SAMPLE          DEC. & VT
solvent         DMSO    dfrq      500.232
                  dn      H1
                  dpwr     39
                  dof     -500.0
                  dm       y
                  dmm      w
ACQUISITION     dmf      10000
sfrq           125.795 dseq
tn             C13     dres      1.0
at            1.736   homo      n
np            131010  temp     100.0
sw            37735.8
fb            not used
bs            64     lb
ss            1     wtfile
tpwr          58     proc
pw            6.9   fn      131072
d1            0.763 math
tof           631.4 werr
nt            20000 wexp
ct            17280 wbs
alock         n     wnt
gain          not used
FLAGS
il            n
in            n
dp            y
hs            nn
DISPLAY
sp           -2545.7
wp           30228.5
vs           1671
sc            0
wc            250
hzmm         120.91
is            500.00
rf1          11413.6
rfp          4969.7
th            20
ins          1.000
ai           ph
```

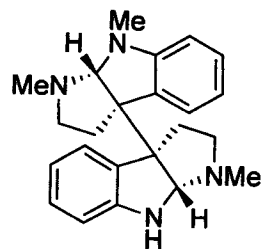

(-)-calycanthidine (**1**)

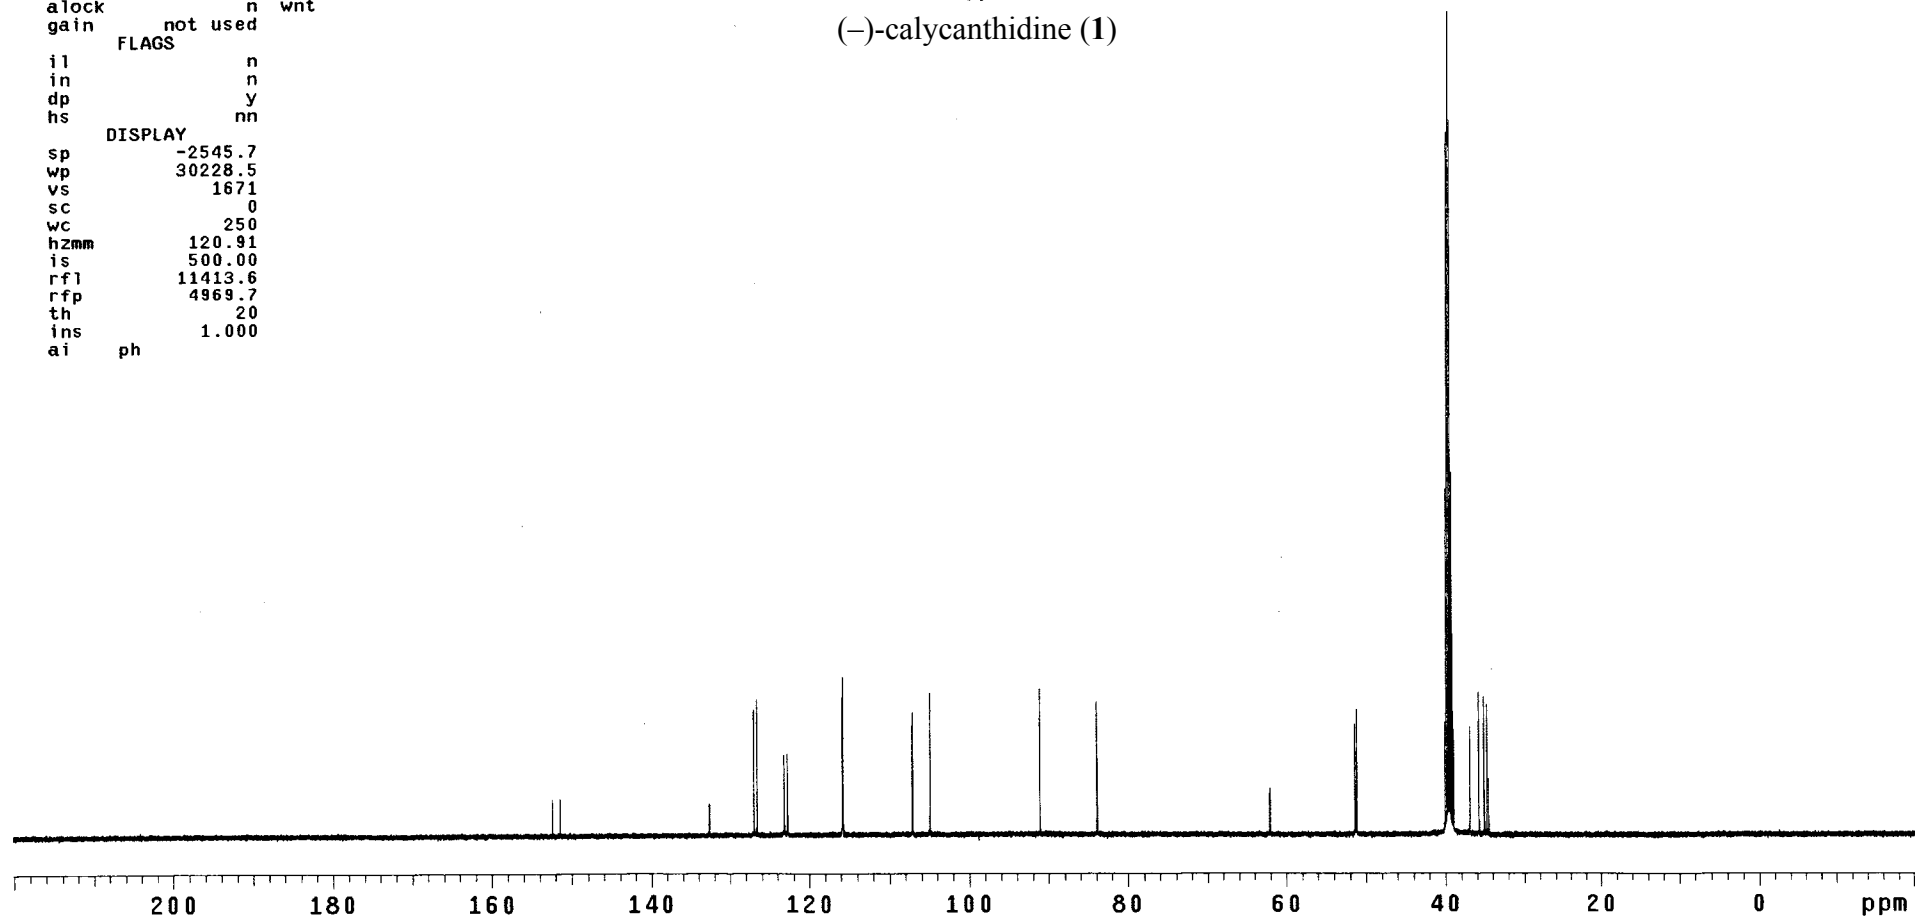

|             |          |            |         |
|-------------|----------|------------|---------|
| SAMPLE      |          | DEC. & VT  |         |
| solvent     | CD3CN    | dfrq       | 125.673 |
|             |          | dn         | C13     |
|             |          | dpwr       | 30      |
|             |          | dof        | 0       |
|             |          | dm         | nnn     |
|             |          | dmm        | w       |
|             |          | dmf        | 10000   |
|             |          | dseq       |         |
|             |          | dres       | 1.0     |
|             |          | homo       | n       |
|             |          | temp       | 70.0    |
| ACQUISITION |          | PROCESSING |         |
| sfrq        | 499.748  | wtfile     |         |
| tn          | H1       | proc       | ft      |
| at          | 3.001    | fn         | 262144  |
| np          | 63050    | math       | f       |
| sw          | 10504.2  |            |         |
| fb          | not used |            |         |
| bs          | 4        | werr       |         |
| tpwr        | 56       | wexp       |         |
| pw          | 8.6      | wbs        |         |
| d1          | 2.000    | wnt        | wft     |
| tof         | 1519.5   |            |         |
| nt          | 16       |            |         |
| ct          | 16       |            |         |
| alock       | n        |            |         |
| gain        | not used |            |         |
| FLAGS       |          |            |         |
| il          | n        |            |         |
| in          | n        |            |         |
| dp          | y        |            |         |
| hs          | nn       |            |         |
| DISPLAY     |          |            |         |
| sp          | -496.2   |            |         |
| wp          | 6482.3   |            |         |
| vs          | 29       |            |         |
| sc          | 0        |            |         |
| wc          | 250      |            |         |
| hzmm        | 25.93    |            |         |
| is          | 288.73   |            |         |
| rfl         | 2217.8   |            |         |
| rfp         | 969.5    |            |         |
| th          | 7        |            |         |
| ins         | 100.000  |            |         |
| ai          | ph       |            |         |

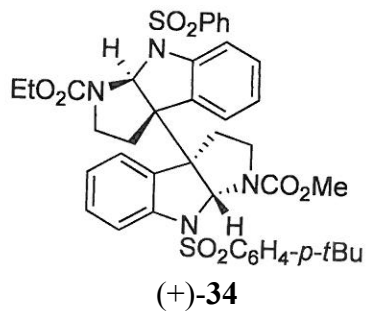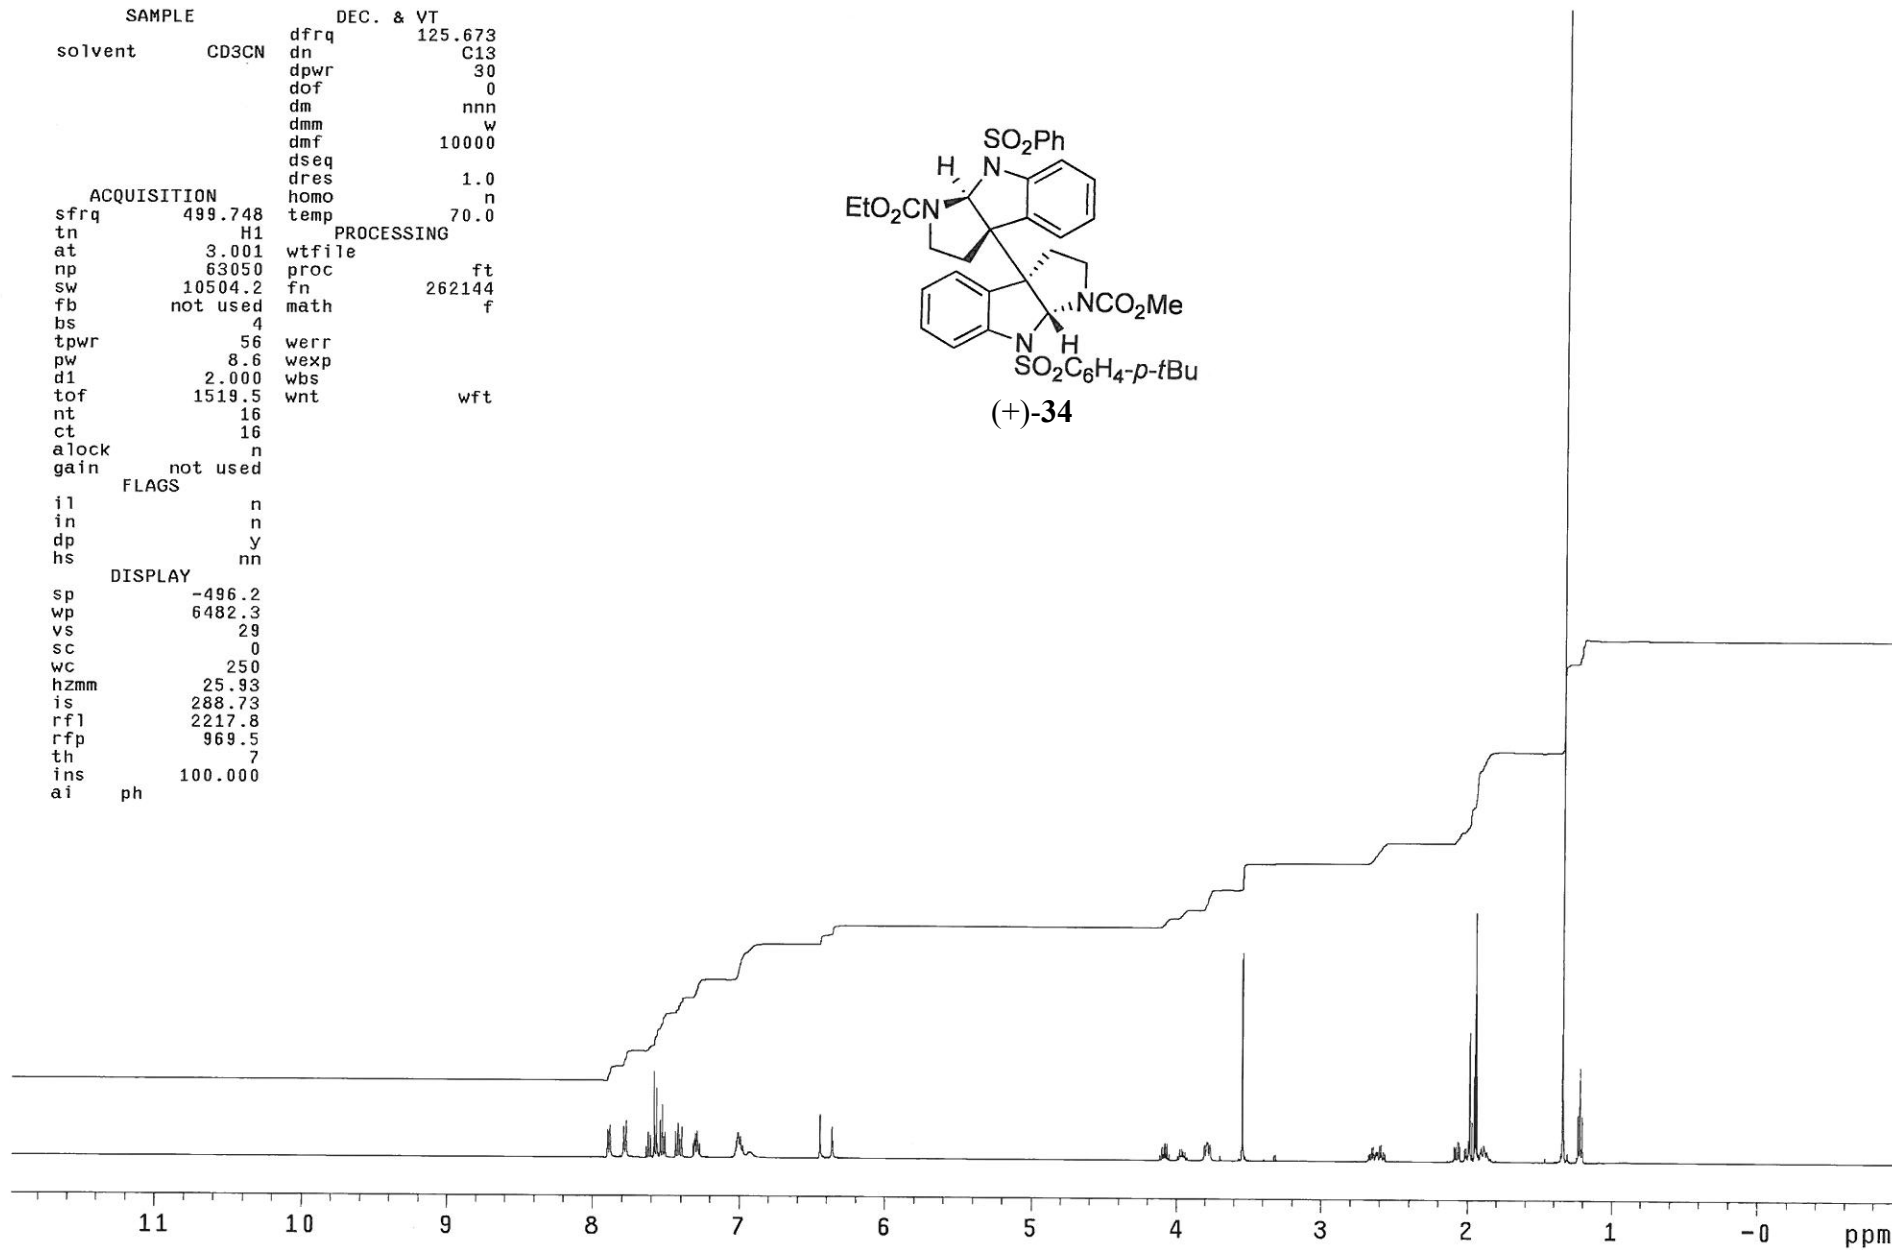

|             |          |            |         |
|-------------|----------|------------|---------|
| SAMPLE      |          | DEC. & VT  |         |
| solvent     | CD3CN    | dfrq       | 500.232 |
|             |          | dn         | H1      |
|             |          | dpwr       | 38      |
|             |          | dof        | -500.0  |
|             |          | dm         | y       |
|             |          | dmm        | w       |
|             |          | dmf        | 10700   |
|             |          | dseq       |         |
|             |          | dres       | 1.0     |
|             |          | homo       | n       |
|             |          | temp       | 70.0    |
| ACQUISITION |          | PROCESSING |         |
| sfrq        | 125.795  | lb         | 0.30    |
| tn          | C13      | wfile      |         |
| at          | 1.736    | proc       | ft      |
| np          | 131010   | fn         | 131072  |
| sw          | 37735.8  | math       | f       |
| fb          | not used |            |         |
| bs          | 32       |            |         |
| ss          | 1        |            |         |
| tpwr        | 59       | werr       |         |
| pw          | 6.9      | wexp       |         |
| d1          | 0.763    | wbs        |         |
| tof         | 631.4    | wnt        |         |
| nt          | 25000    |            |         |
| ct          | 20992    |            |         |
| alock       | n        |            |         |
| gain        | not used |            |         |
| FLAGS       |          |            |         |
| il          | n        |            |         |
| in          | n        |            |         |
| dp          | y        |            |         |
| hs          | nn       |            |         |
| DISPLAY     |          |            |         |
| sp          | -2522.3  |            |         |
| wp          | 30188.2  |            |         |
| vs          | 2423     |            |         |
| sc          | 0        |            |         |
| wc          | 250      |            |         |
| hzmm        | 120.75   |            |         |
| is          | 500.00   |            |         |
| rfl         | 21011.6  |            |         |
| rfp         | 14929.1  |            |         |
| th          | 20       |            |         |
| ins         | 1.000    |            |         |
| ai          | ph       |            |         |

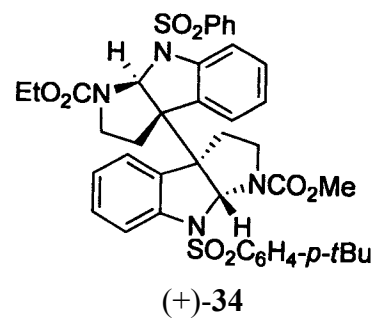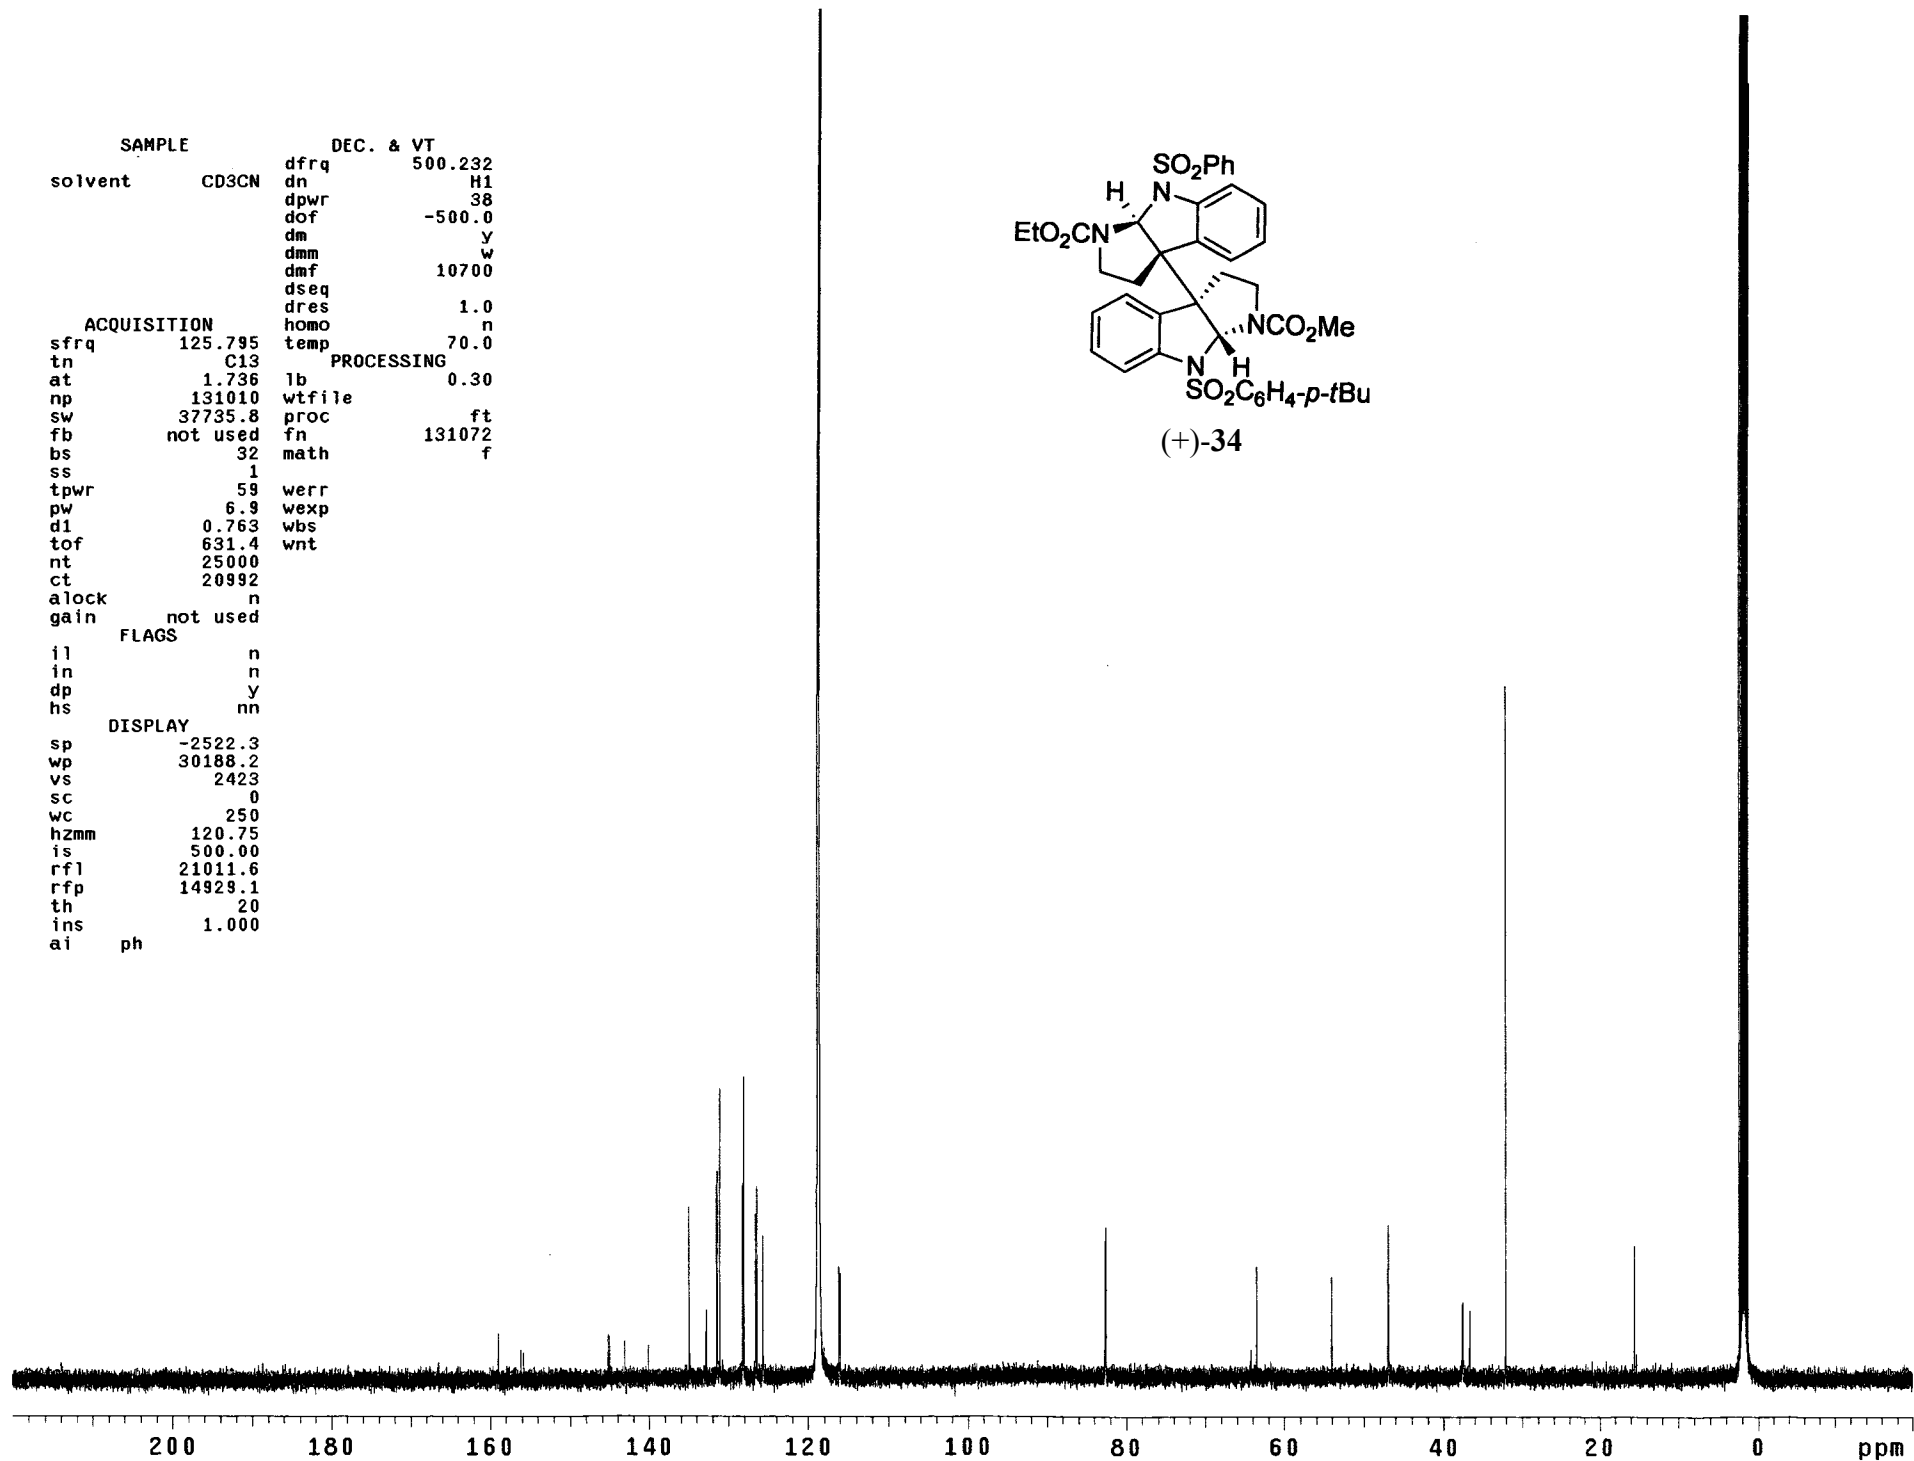

|             |          |            |         |
|-------------|----------|------------|---------|
| SAMPLE      |          | DEC. & VT  |         |
| solvent     | CD3CN    | dfrq       | 125.673 |
|             |          | dn         | C13     |
|             |          | dpwr       | 30      |
|             |          | dof        | 0       |
|             |          | dm         | nnn     |
|             |          | dmm        | w       |
|             |          | dmf        | 10000   |
|             |          | dseq       |         |
|             |          | dres       | 1.0     |
|             |          | homo       | n       |
|             |          | temp       | 75.0    |
| ACQUISITION |          | PROCESSING |         |
| sfrq        | 499.748  | wtfile     | ft      |
| tn          | H1       | proc       | 262144  |
| at          | 3.001    | fn         | f       |
| np          | 63050    | math       |         |
| sw          | 10504.2  |            |         |
| fb          | not used |            |         |
| bs          | 8        |            |         |
| tpwr        | 56       | werr       |         |
| pw          | 8.6      | wexp       |         |
| d1          | 2.000    | wbs        |         |
| tof         | 1519.5   | wnt        | wft     |
| nt          | 32       |            |         |
| ct          | 16       |            |         |
| alock       | n        |            |         |
| gain        | not used |            |         |
| FLAGS       |          |            |         |
| il          | n        |            |         |
| in          | n        |            |         |
| dp          | y        |            |         |
| hs          | nn       |            |         |
| DISPLAY     |          |            |         |
| sp          | -504.7   |            |         |
| wp          | 6500.6   |            |         |
| vs          | 234      |            |         |
| sc          | 0        |            |         |
| wc          | 250      |            |         |
| hzmm        | 26.00    |            |         |
| is          | 490.69   |            |         |
| rfl         | 2217.4   |            |         |
| rfp         | 969.5    |            |         |
| th          | 7        |            |         |
| ins         | 100.000  |            |         |
| ai          | ph       |            |         |

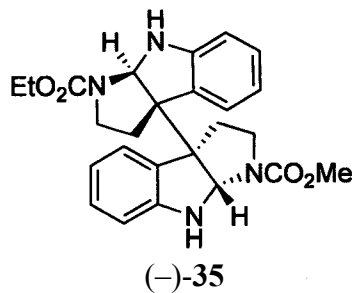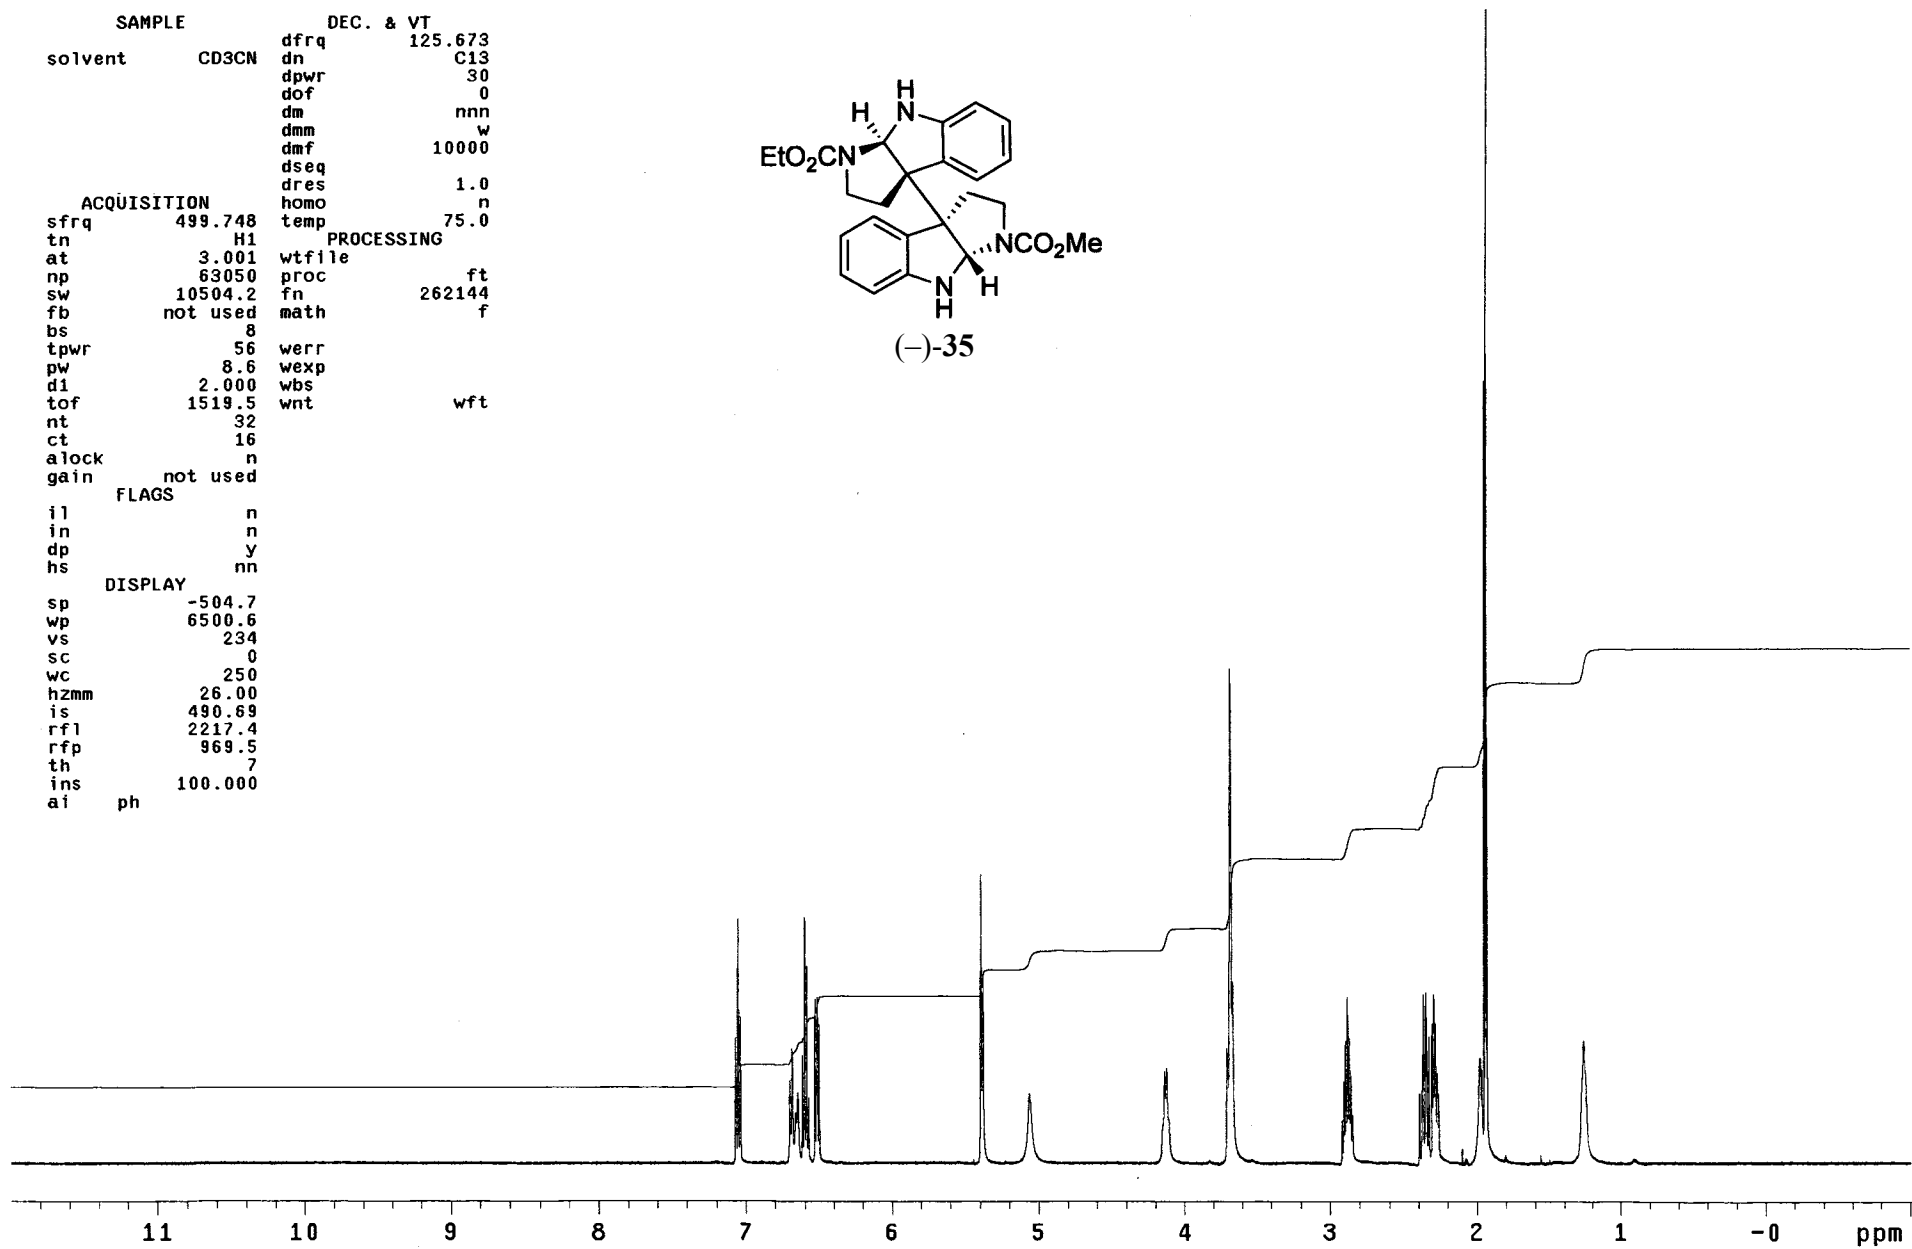

| SAMPLE      |          | DEC. & VT  |         |
|-------------|----------|------------|---------|
| solvent     | CD3CN    | dfrq       | 500.232 |
|             |          | dn         | H1      |
|             |          | dpwr       | 39      |
|             |          | dof        | -500.0  |
|             |          | dm         | y       |
|             |          | dmm        | w       |
|             |          | dmf        | 10000   |
|             |          | dseq       |         |
|             |          | dres       | 1.0     |
|             |          | homo       | n       |
|             |          | temp       | 75.0    |
| ACQUISITION |          | PROCESSING |         |
| sfrq        | 125.795  | lb         | 0.30    |
| tn          | C13      | wtfile     |         |
| at          | 1.736    | proc       | ft      |
| np          | 131010   | fn         | 131072  |
| sw          | 37735.8  | math       | f       |
| fb          | not used |            |         |
| bs          | 64       |            |         |
| ss          | 1        |            |         |
| tpwr        | 58       | werr       |         |
| pw          | 6.9      | wexp       |         |
| d1          | 0.763    | wbs        |         |
| tof         | 631.4    | wnt        |         |
| nt          | 25000    |            |         |
| ct          | 17216    |            |         |
| alock       | n        |            |         |
| gain        | not used |            |         |
| FLAGS       |          |            |         |
| il          | n        |            |         |
| in          | n        |            |         |
| dp          | y        |            |         |
| hs          | nn       |            |         |
| DISPLAY     |          |            |         |
| sp          | -2586.2  |            |         |
| wp          | 30223.3  |            |         |
| vs          | 892      |            |         |
| sc          | 0        |            |         |
| wc          | 250      |            |         |
| hzmm        | 120.89   |            |         |
| is          | 500.00   |            |         |
| rfl         | 21004.2  |            |         |
| rfp         | 14929.1  |            |         |
| th          | 20       |            |         |
| ins         | 1.000    |            |         |
| ai          | ph       |            |         |

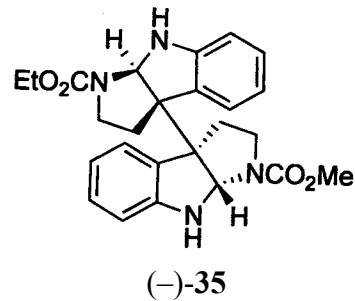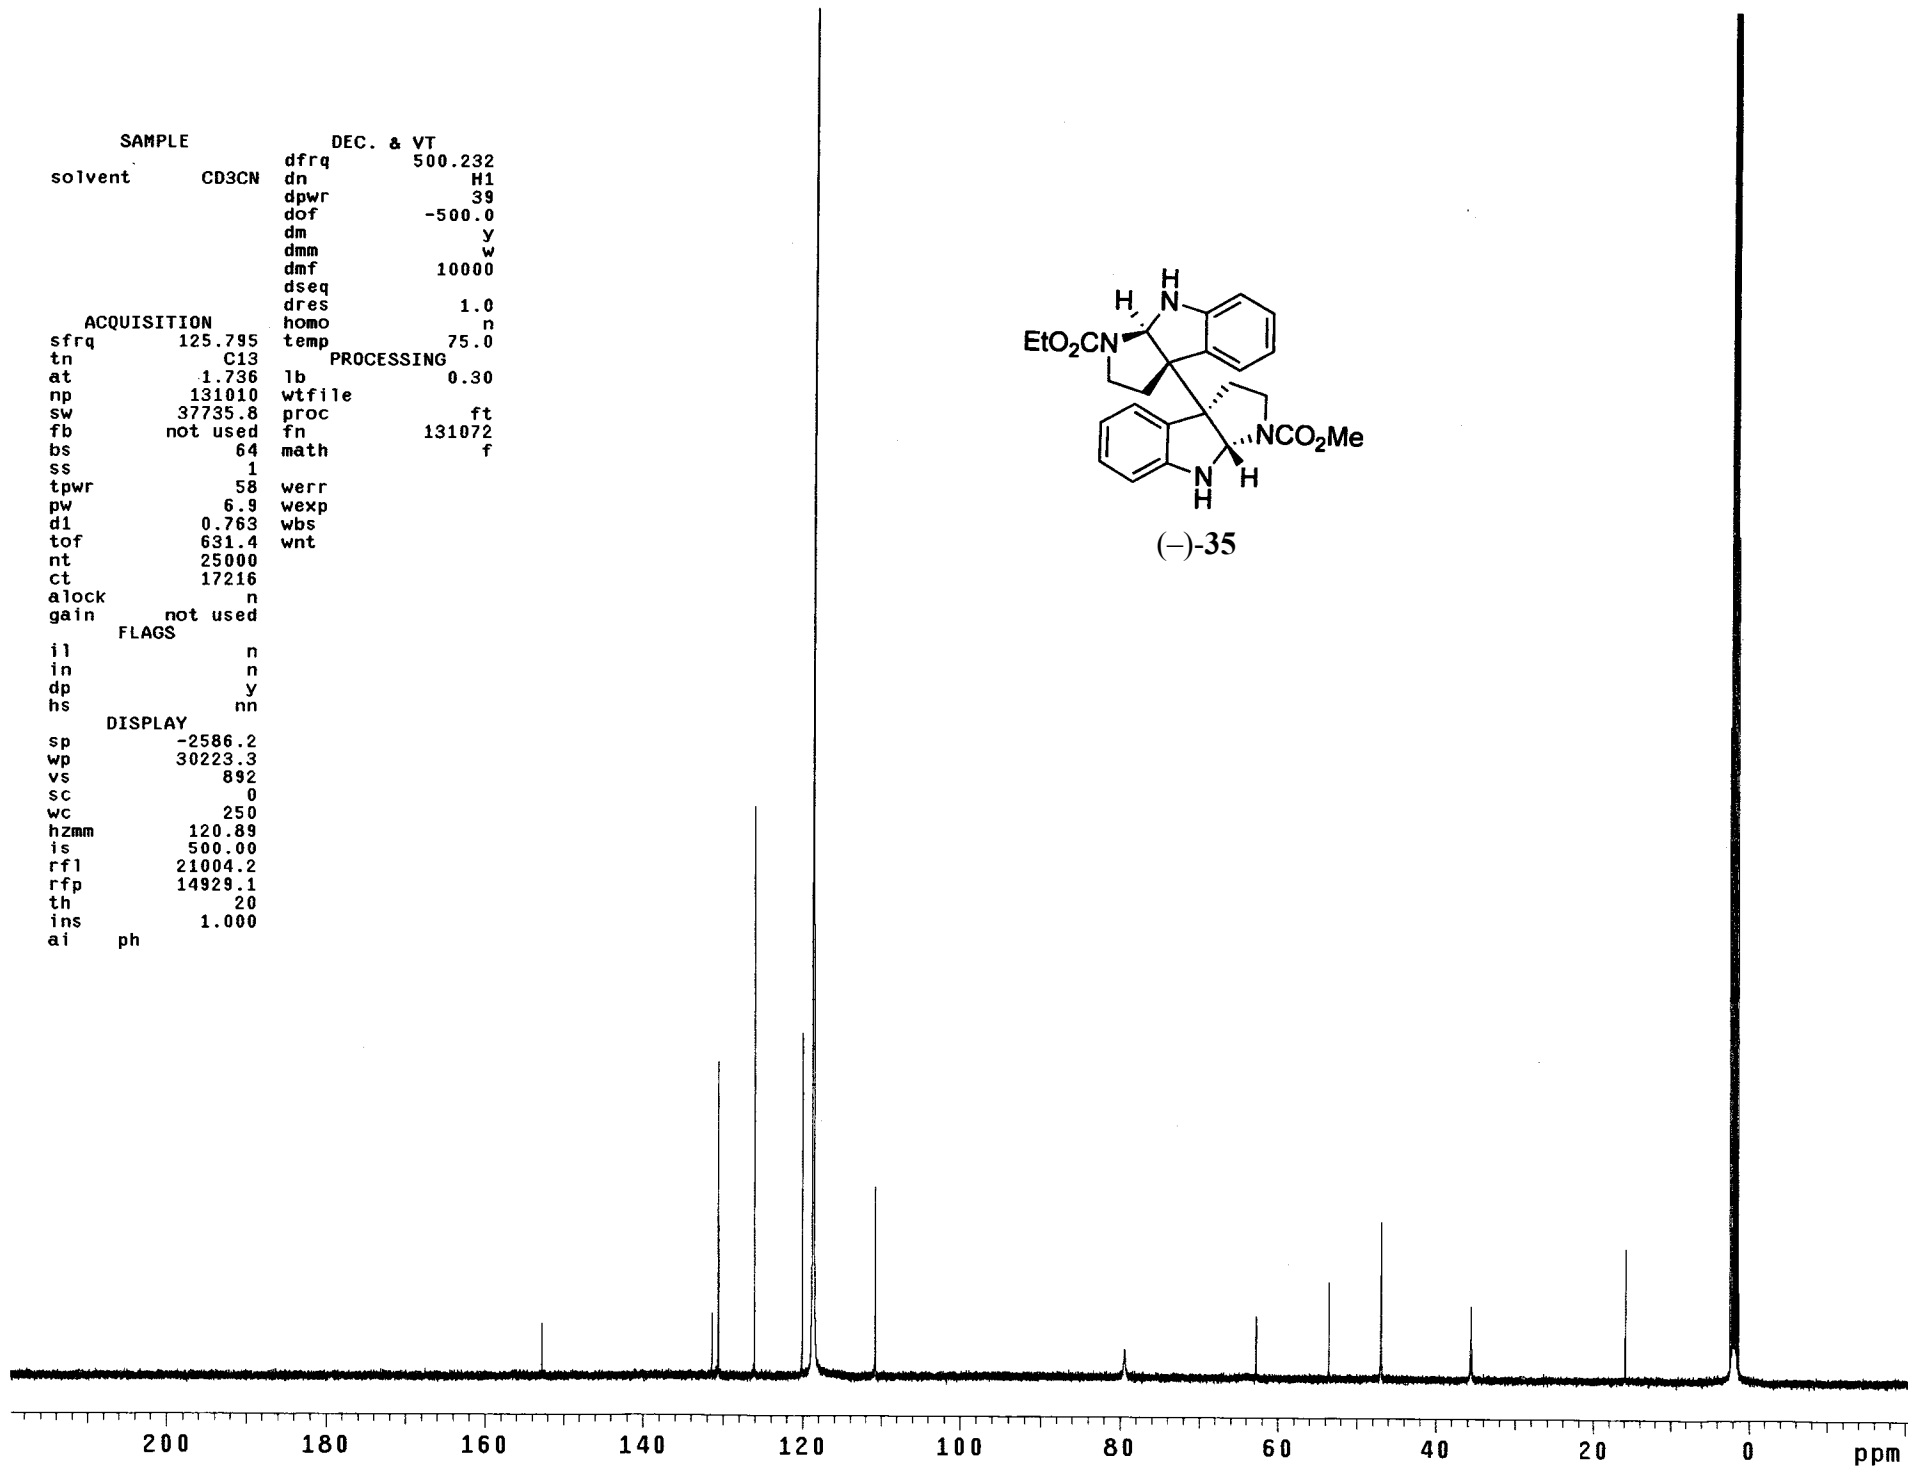

S134/S153

```
SAMPLE          DEC. & VT
solvent         CD30D    dfrq      125.673
                  dn       C13
                  dpwr     30
                  dof      0
                  dm       nnn
                  dmm      w
                  dmf     10000
ACQUISITION     dseq
sfrq           499.748  dres      1.0
tn             H1      homo       n
at             3.001   temp      55.0
np             63050
sw             10504.2  wtfiler
fb             not used proc
bs             4       fn       262144
tpwr           56     math
pw             8.6
d1             2.000   werr
tof           1519.5   wexp
nt             16     wbs
ct             16     wnt
alock          n
gain           not used
FLAGS
il             n
in             n
dp             Y
hs            nn
DISPLAY
sp            -508.9
wp            6508.2
vs            65
sc            0
wc            250
hzmm         26.03
is            210.20
rf1           2283.1
rfp           1654.1
th            7
ins           100.000
ai           ph
```

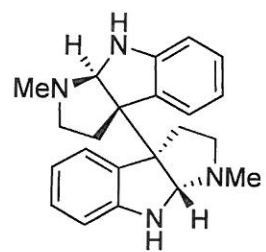

*meso*-chimonanthine (2)

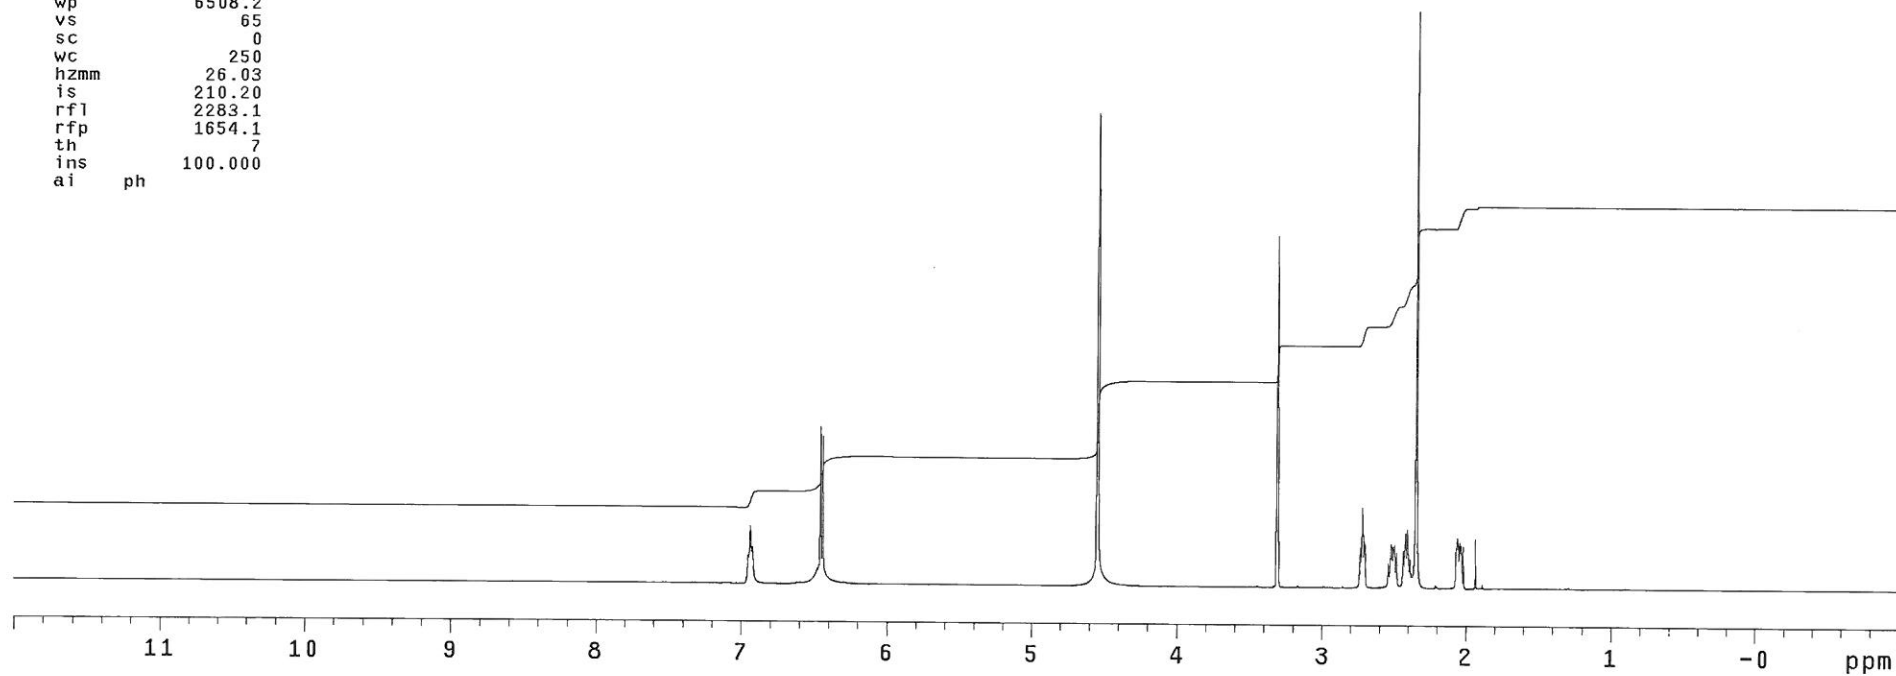

```
SAMPLE          DEC. & VT
solvent          CD3OD      dfrq      500.231
                  dn        H1
                  dpwr      39
                  dof       -500.0
                  dm        y
                  dmm       w
                  dmf       10000
ACQUISITION      dseq
sfrq            125.795    dres      1.0
tn              C13       homo         n
at              1.736     temp      55.0
np              131010
sw              37735.8    lb         0.30
fb              not used  wtfile
bs              64        proc       ft
ss              1         fn        131072
tpwr            58        math      f
pw              6.9
d1              0.763     werr
tof             631.4     wexp
nt              18000     wbs
ct              16832     wnt
alock           n
gain            not used
FLAGS
il              n
in              n
dp              y
hs              nn
DISPLAY
sp              -2573.3
wp              30249.8
vs              2412
sc              0
wc              250
hzmm            121.00
is              500.00
rfl            12298.8
rfp            6182.5
th              20
ins            1.000
ai              ph
```

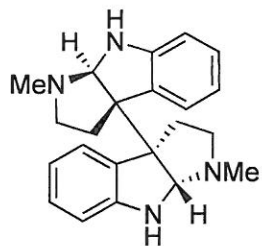

*meso*-chimonanthine (2)

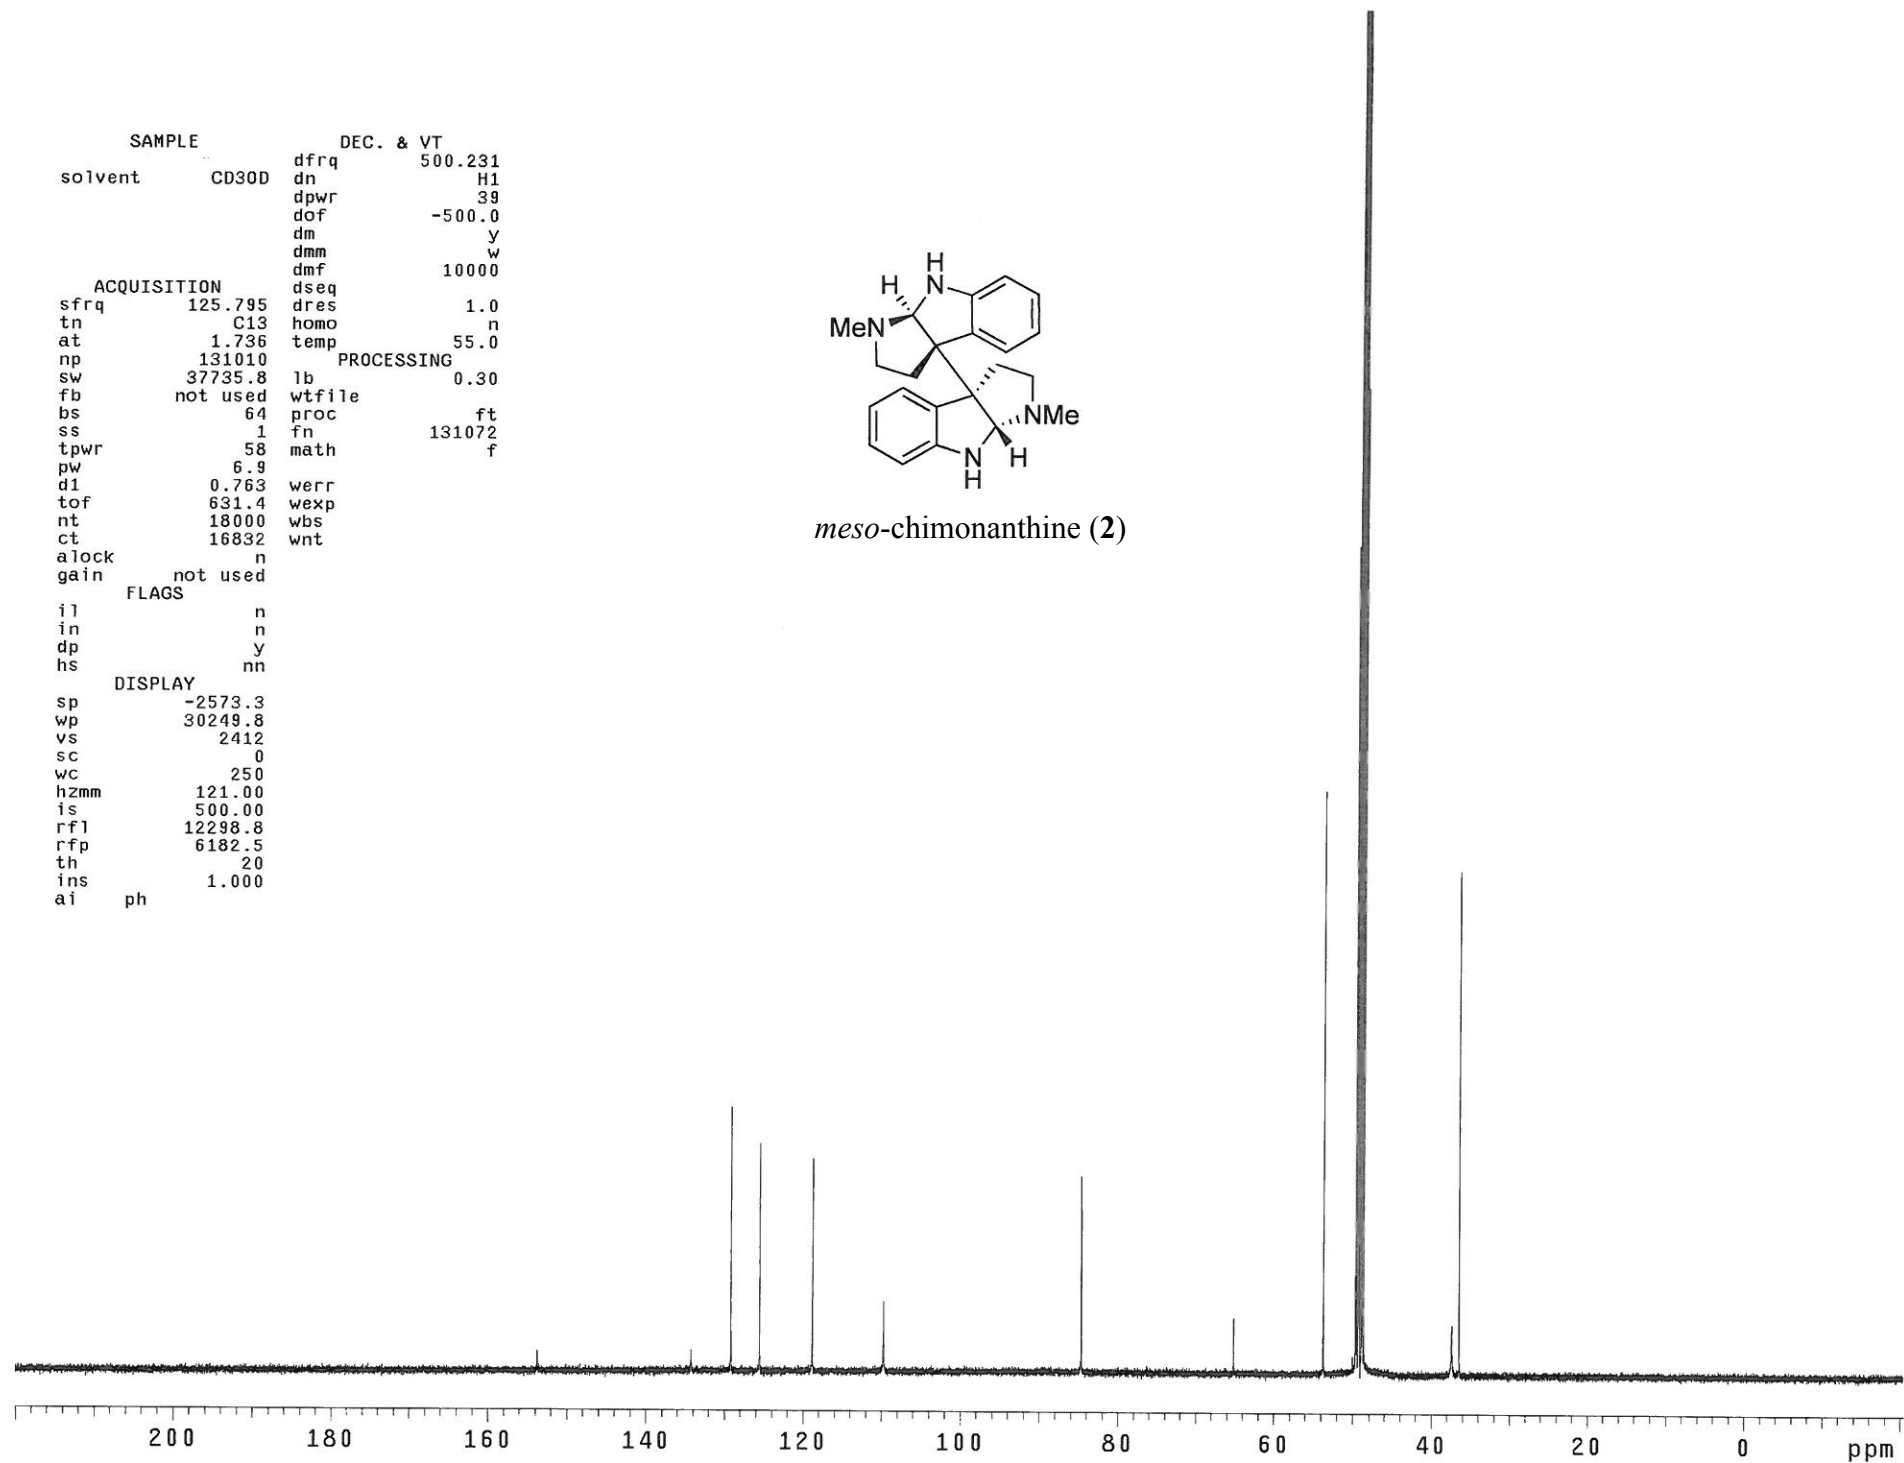

S136/S153

```
SAMPLE          DEC. & VT
solvent          DMSO    dfrq      125.795
                  dn      C13
                  dpwr     39
                  dof      0
                  dm       nnn
                  dmm       c
ACQUISITION     dmf      10000
sfrq            500.234 dseq
tn              H1      dres      1.0
at              3.200   homo       n
np              64000   temp     120.0
sw              10000.0
fb              not used
bs              8
ss              1
tpwr            60      wtfile
pw              9.0     proc
dl              1.800   werr
tof             1498.2  wexp
nt              32     wbs
ct              32     wnt
a1ock           n
gain            not used
FLAGS
il              n
in              n
dp              y
hs              nn
DISPLAY
sp              -498.0
wp              6501.5
vs              61
sc              0
wc              250
hzmm           26.01
is              203.12
rfl            2243.7
rfp            1250.6
th              7
ins            1.000
ai              ph
```

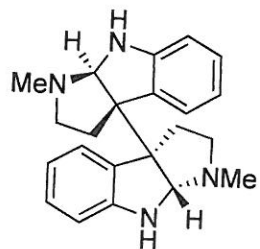

*meso*-chimonanthine (2)

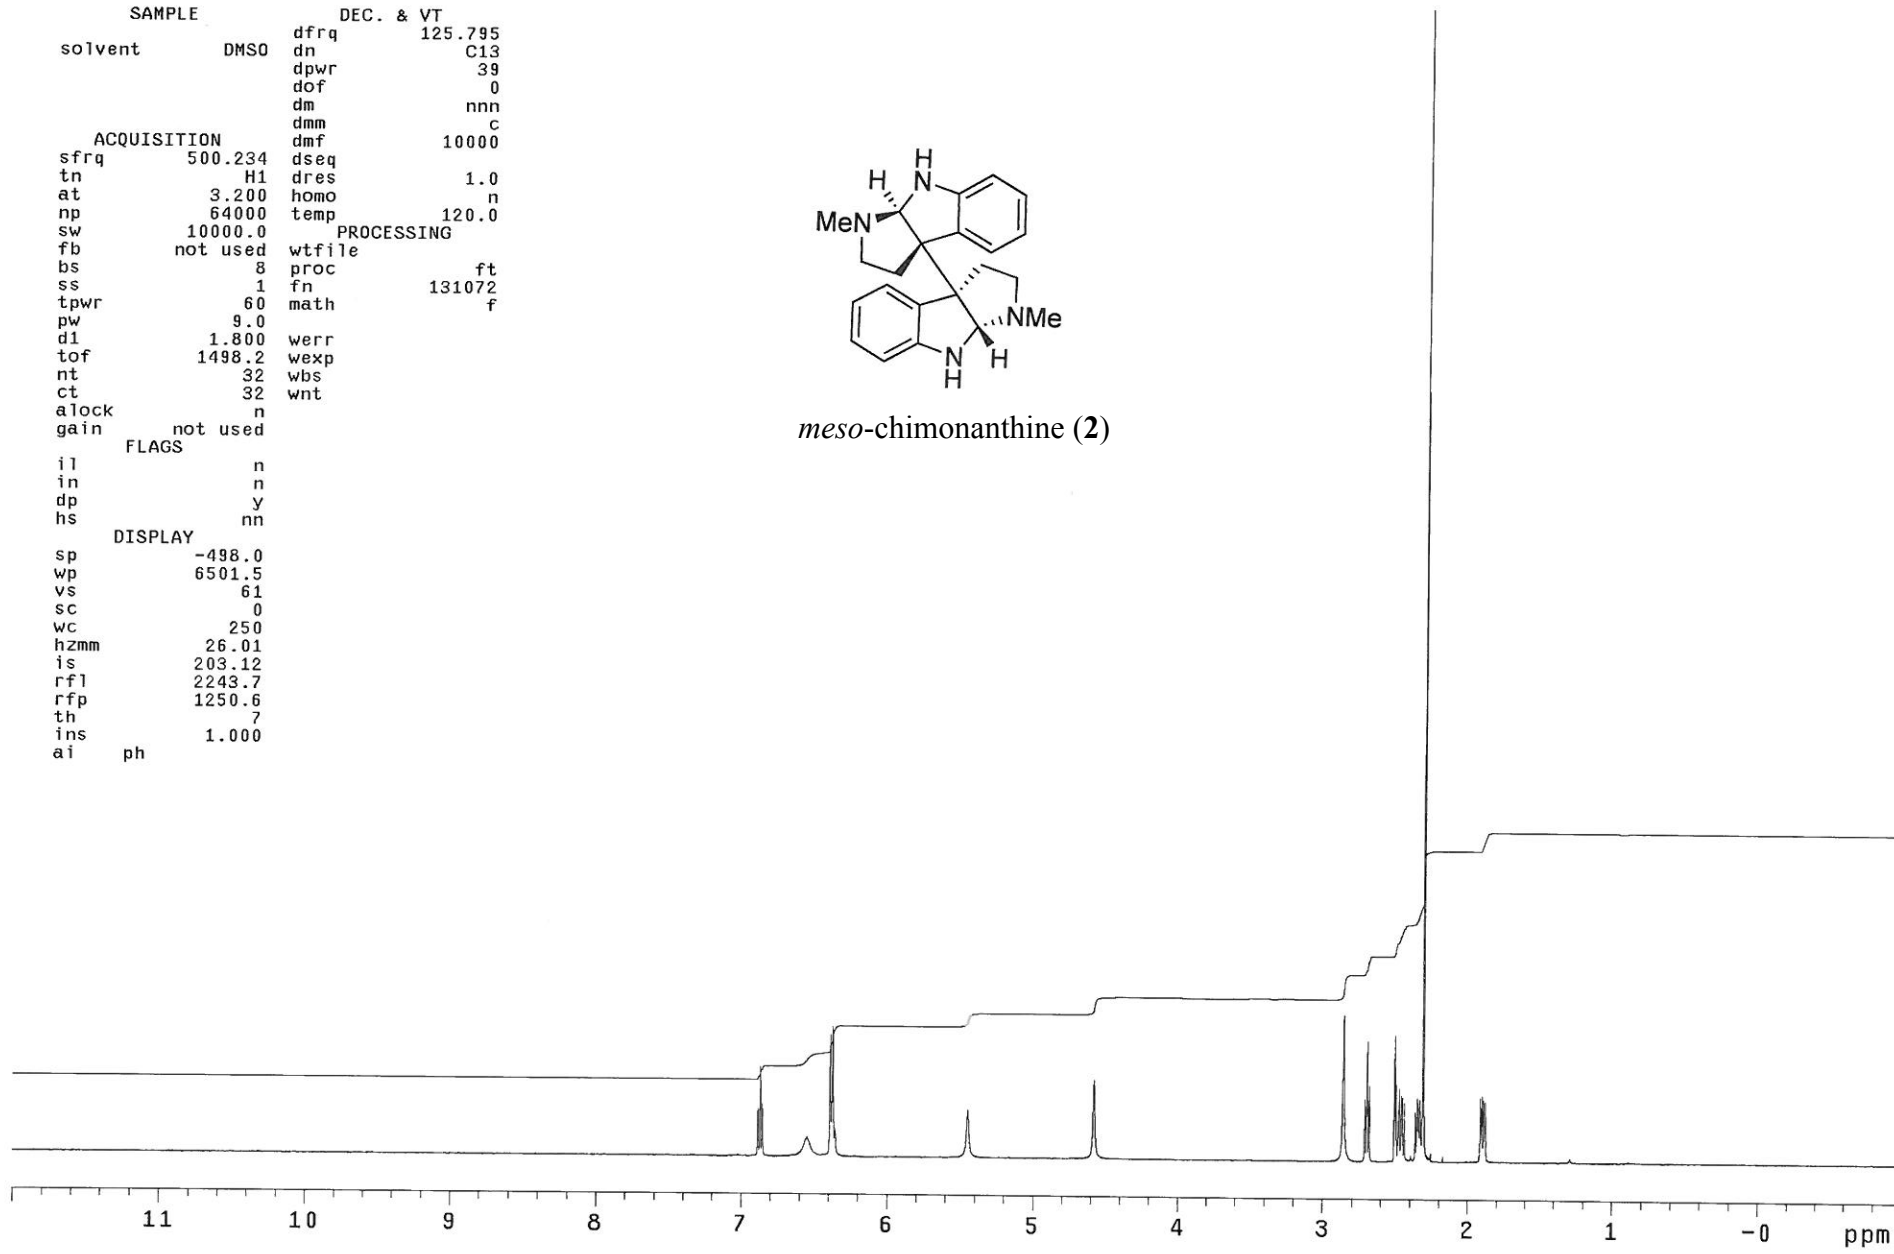



|             |          |            |         |
|-------------|----------|------------|---------|
| SAMPLE      |          | DEC. & VT  |         |
| solvent     | DMSO     | dfrq       | 500.232 |
|             |          | dn         | H1      |
|             |          | dpwr       | 40      |
|             |          | dof        | -500.0  |
|             |          | dm         | y       |
|             |          | dmm        | w       |
|             |          | dmf        | 10000   |
|             |          | dseq       |         |
|             |          | dres       | 1.0     |
| ACQUISITION |          | homo       | n       |
| sfrq        | 125.795  | temp       | 120.0   |
| tn          | C13      | PROCESSING |         |
| at          | 1.736    | lb         | 0.30    |
| np          | 131010   | wtfile     |         |
| sw          | 37735.8  | proc       | ft      |
| fb          | not used | fn         | 131072  |
| bs          | 32       | math       | f       |
| ss          | 1        |            |         |
| tpwr        | 58       | werr       |         |
| pw          | 6.9      | wexp       |         |
| d1          | 0.763    | wbs        |         |
| tof         | 631.4    | wnt        |         |
| nt          | 25000    |            |         |
| ct          | 16192    |            |         |
| alock       | not used |            |         |
| gain        | not used |            |         |
| FLAGS       |          |            |         |
| il          | n        |            |         |
| in          | n        |            |         |
| dp          | y        |            |         |
| hs          | nn       |            |         |
| DISPLAY     |          |            |         |
| sp          | -2508.8  |            |         |
| wp          | 30170.4  |            |         |
| vs          | 537      |            |         |
| sc          | 0        |            |         |
| wc          | 250      |            |         |
| hzmm        | 120.68   |            |         |
| is          | 500.00   |            |         |
| rfl         | 11428.0  |            |         |
| rfp         | 3837.7   |            |         |
| th          | 20       |            |         |
| ins         | 1.000    |            |         |
| ai          | ph       |            |         |

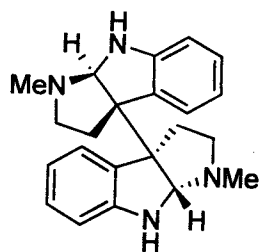

*meso*-chimonanthine (2)

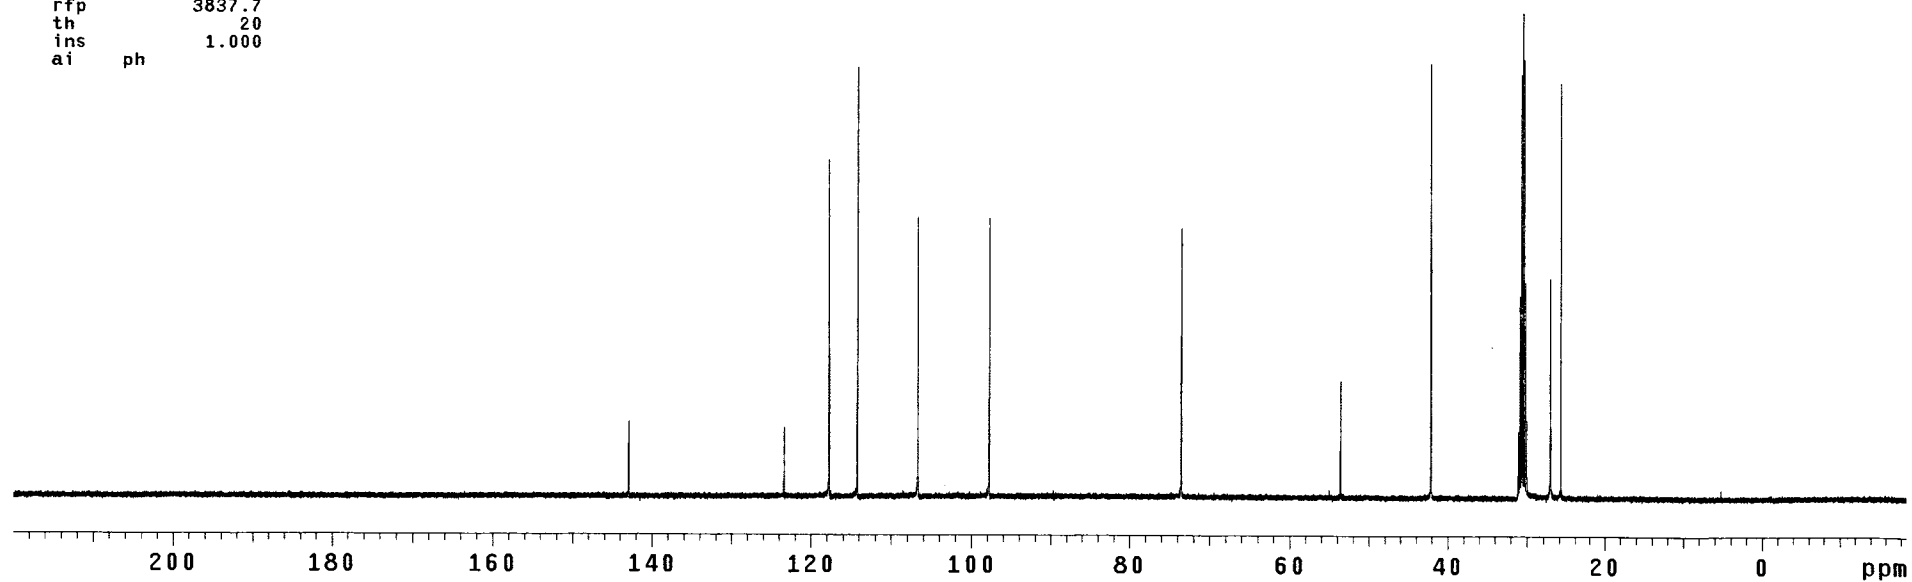

| SAMPLE      |          | DEC. & VT  |         |
|-------------|----------|------------|---------|
| solvent     | CD2C12   | dfrq       | 125.672 |
|             |          | dn         | C13     |
|             |          | dpwr       | 30      |
|             |          | dof        | 0       |
|             |          | dm         | nnn     |
|             |          | dmm        | w       |
|             |          | dmf        | 10000   |
| ACQUISITION |          | dseq       |         |
| sfrq        | 499.747  | dres       | 1.0     |
| tn          | H1       | homo       | n       |
| at          | 3.001    |            |         |
| np          | 63050    | PROCESSING |         |
| sw          | 10504.2  | wfile      |         |
| fb          | not used | proc       | ft      |
| bs          | 4        | fn         | 262144  |
| tpwr        | 56       | math       | f       |
| pw          | 8.6      |            |         |
| d1          | 2.000    | werr       |         |
| tof         | 1519.5   | wexp       |         |
| nt          | 16       | wbs        |         |
| ct          | 8        | wnt        | wft     |
| alock       | n        |            |         |
| gain        | not used |            |         |
| FLAGS       |          |            |         |
| il          | n        |            |         |
| in          | n        |            |         |
| dp          | y        |            |         |
| hs          | nn       |            |         |
| DISPLAY     |          |            |         |
| sp          | -506.0   |            |         |
| wp          | 6501.7   |            |         |
| vs          | 20       |            |         |
| sc          | 0        |            |         |
| wc          | 250      |            |         |
| hzmm        | 26.01    |            |         |
| is          | 131.20   |            |         |
| rfl         | 3904.1   |            |         |
| rff         | 2658.6   |            |         |
| th          | 7        |            |         |
| ins         | 100.000  |            |         |
| ai          | ph       |            |         |

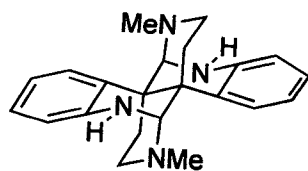

*meso*-calycanthine (36)

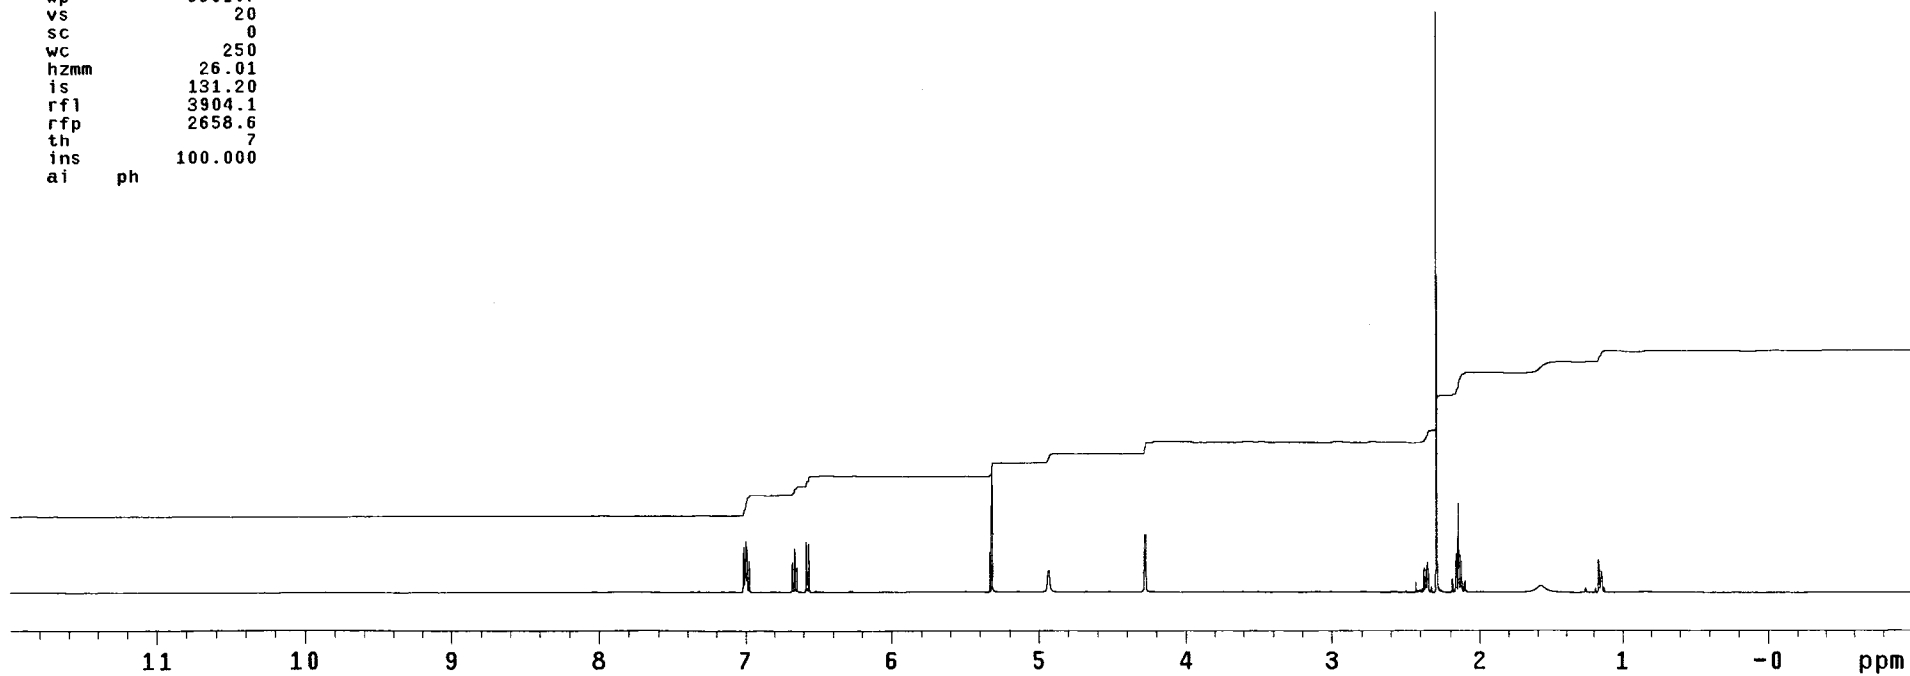

```
SAMPLE          DEC. & VT
solvent         CD2C12    dfrq      500.230
                  dn       H1
                  dpwr     39
                  dof      -500.0
                  dm       y
                  dmm      w
ACQUISITION     dmf      10000
sfrq           125.795  dseq
tn             C13     dres      1.0
at            1.736   homo      n
np            131010
sw            37735.8  lb        0.30
fb            not used wtfile
bs            64      proc      ft
ss            1       fn        131072
tpwr          58      math     f
pw            6.9
d1            0.763   werr
tof           631.4   wexp
nt            20000   wbs
ct            13632   wnt
alock         n
gain          not used
FLAGS
il            n
in            n
dp            y
hs            nn
DISPLAY
sp            -2519.1
wp            30170.4
vs            2132
sc            0
wc            250
hzmm         120.68
is            500.00
rfl          13036.2
rfp          6792.2
th            20
ins          1.000
ai           ph
```

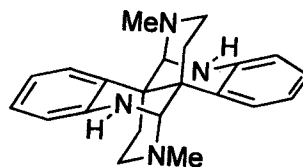

*meso*-calycanthine (36)

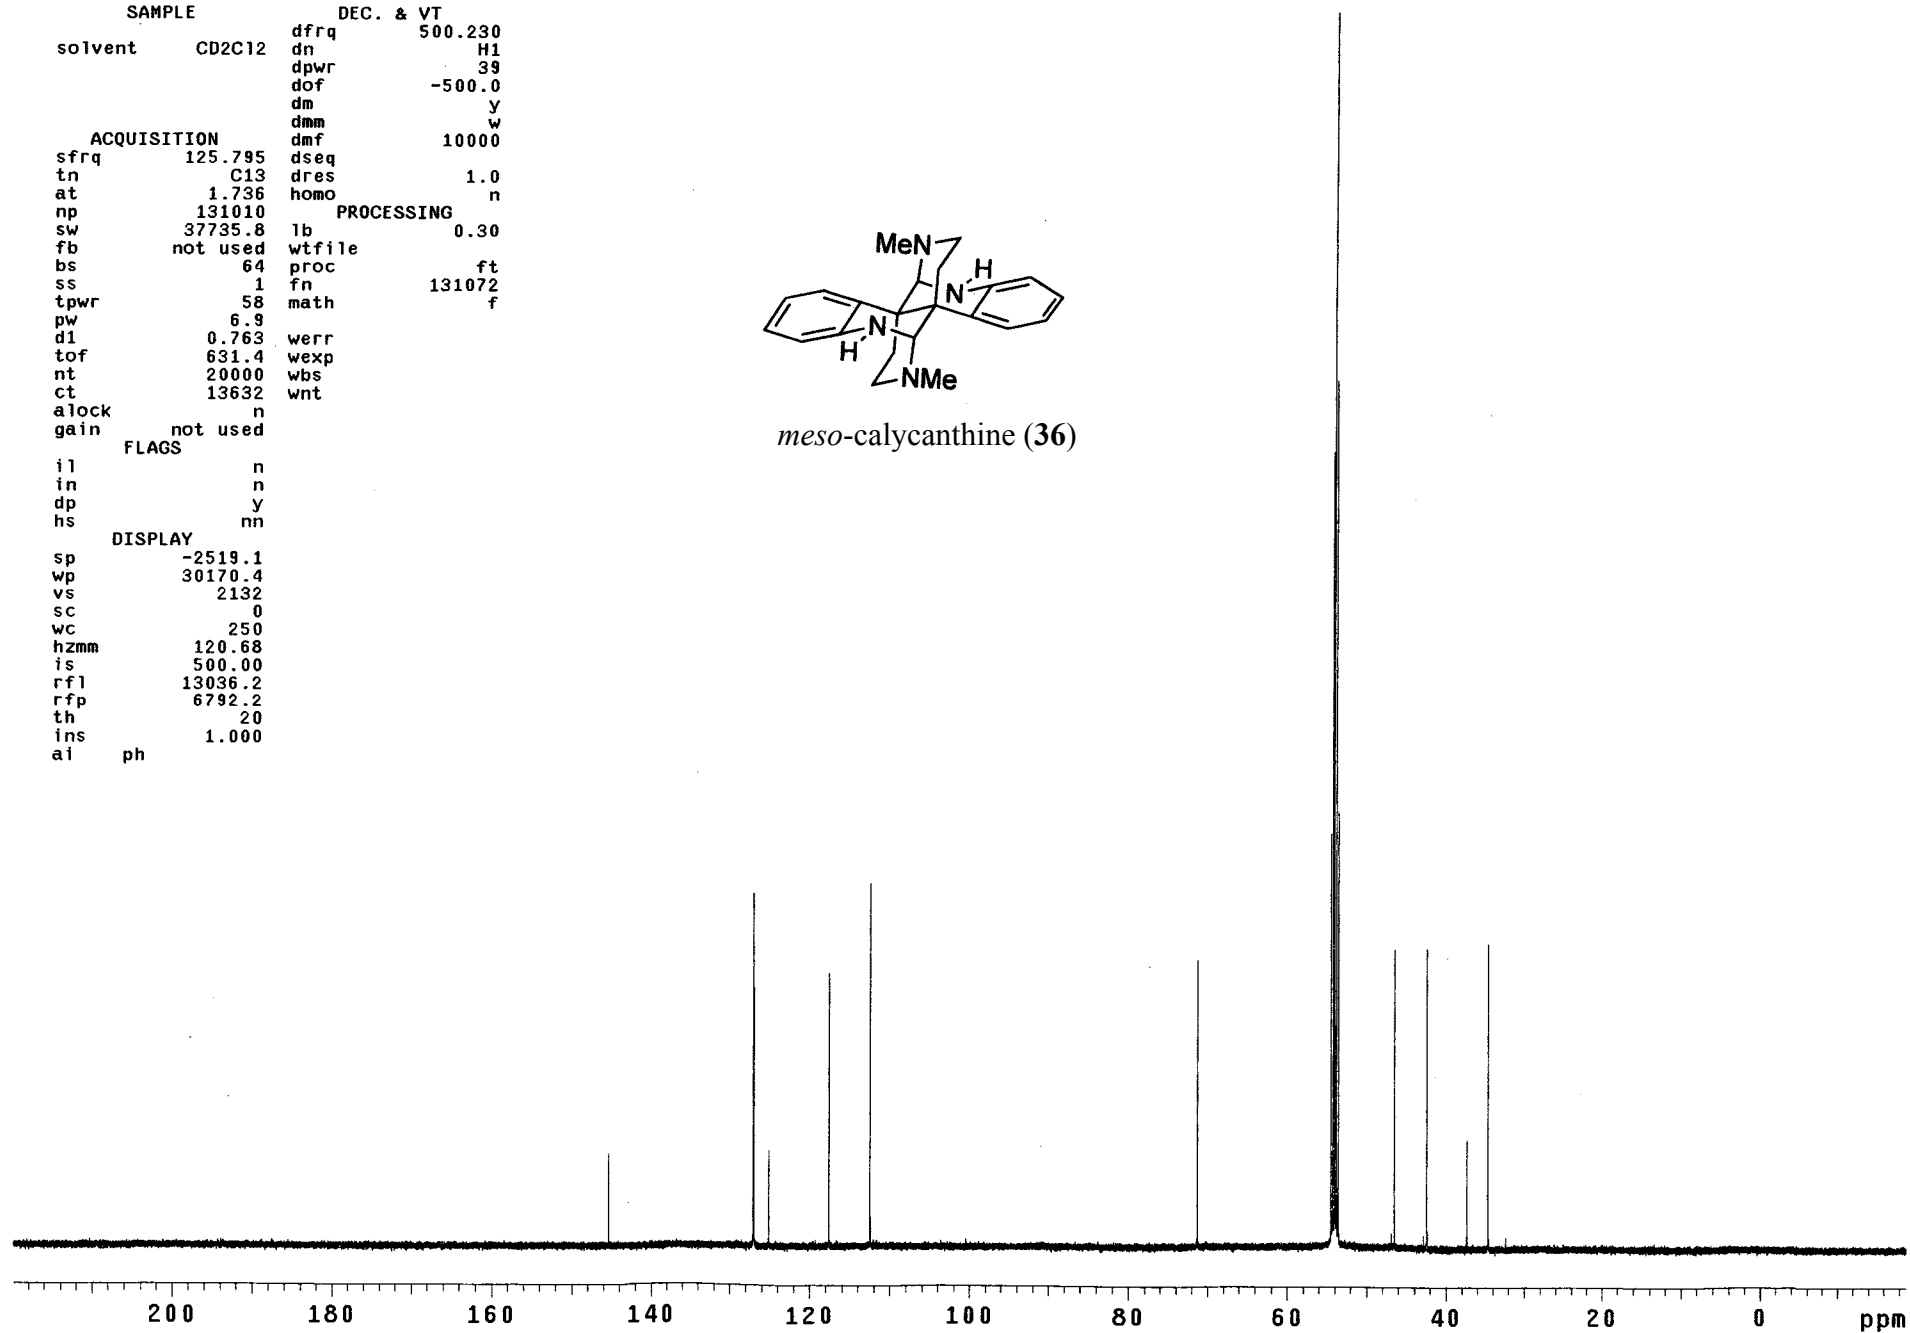

S140/S153

| SAMPLE      |          | DEC. & VT  |         |
|-------------|----------|------------|---------|
| solvent     | CD3CN    | dfrq       | 125.673 |
|             |          | dn         | C13     |
|             |          | dpwr       | 30      |
|             |          | dof        | 0       |
|             |          | dm         | nnn     |
|             |          | dmm        | w       |
|             |          | dmf        | 10000   |
|             |          | dseq       |         |
|             |          | dres       | 1.0     |
|             |          | homo       | n       |
|             |          | temp       | 75.0    |
| ACQUISITION |          | PROCESSING |         |
| sfrq        | 499.748  | wtfile     |         |
| tn          | H1       | proc       | ft      |
| at          | 3.001    | fn         | 262144  |
| np          | 63050    | math       | f       |
| sw          | 10504.2  |            |         |
| fb          | not used |            |         |
| bs          | 8        |            |         |
| tpwr        | 56       | werr       |         |
| pw          | 8.6      | wexp       |         |
| d1          | 2.000    | wbs        |         |
| tof         | 1519.5   | wnt        | wft     |
| nt          | 32       |            |         |
| ct          | 24       |            |         |
| alock       | n        |            |         |
| gain        | not used |            |         |
| FLAGS       |          |            |         |
| il          | n        |            |         |
| in          | n        |            |         |
| dp          | y        |            |         |
| hs          | nn       |            |         |
| DISPLAY     |          |            |         |
| sp          | -497.2   |            |         |
| wp          | 6487.5   |            |         |
| vs          | 172      |            |         |
| sc          | 0        |            |         |
| wc          | 250      |            |         |
| hzmm        | 25.95    |            |         |
| is          | 208.11   |            |         |
| rfl         | 2217.7   |            |         |
| rfl         | 969.5    |            |         |
| th          | 7        |            |         |
| ins         | 100.000  |            |         |
| ai          | ph       |            |         |

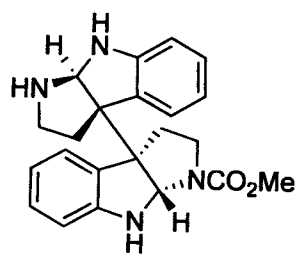

(-)-37

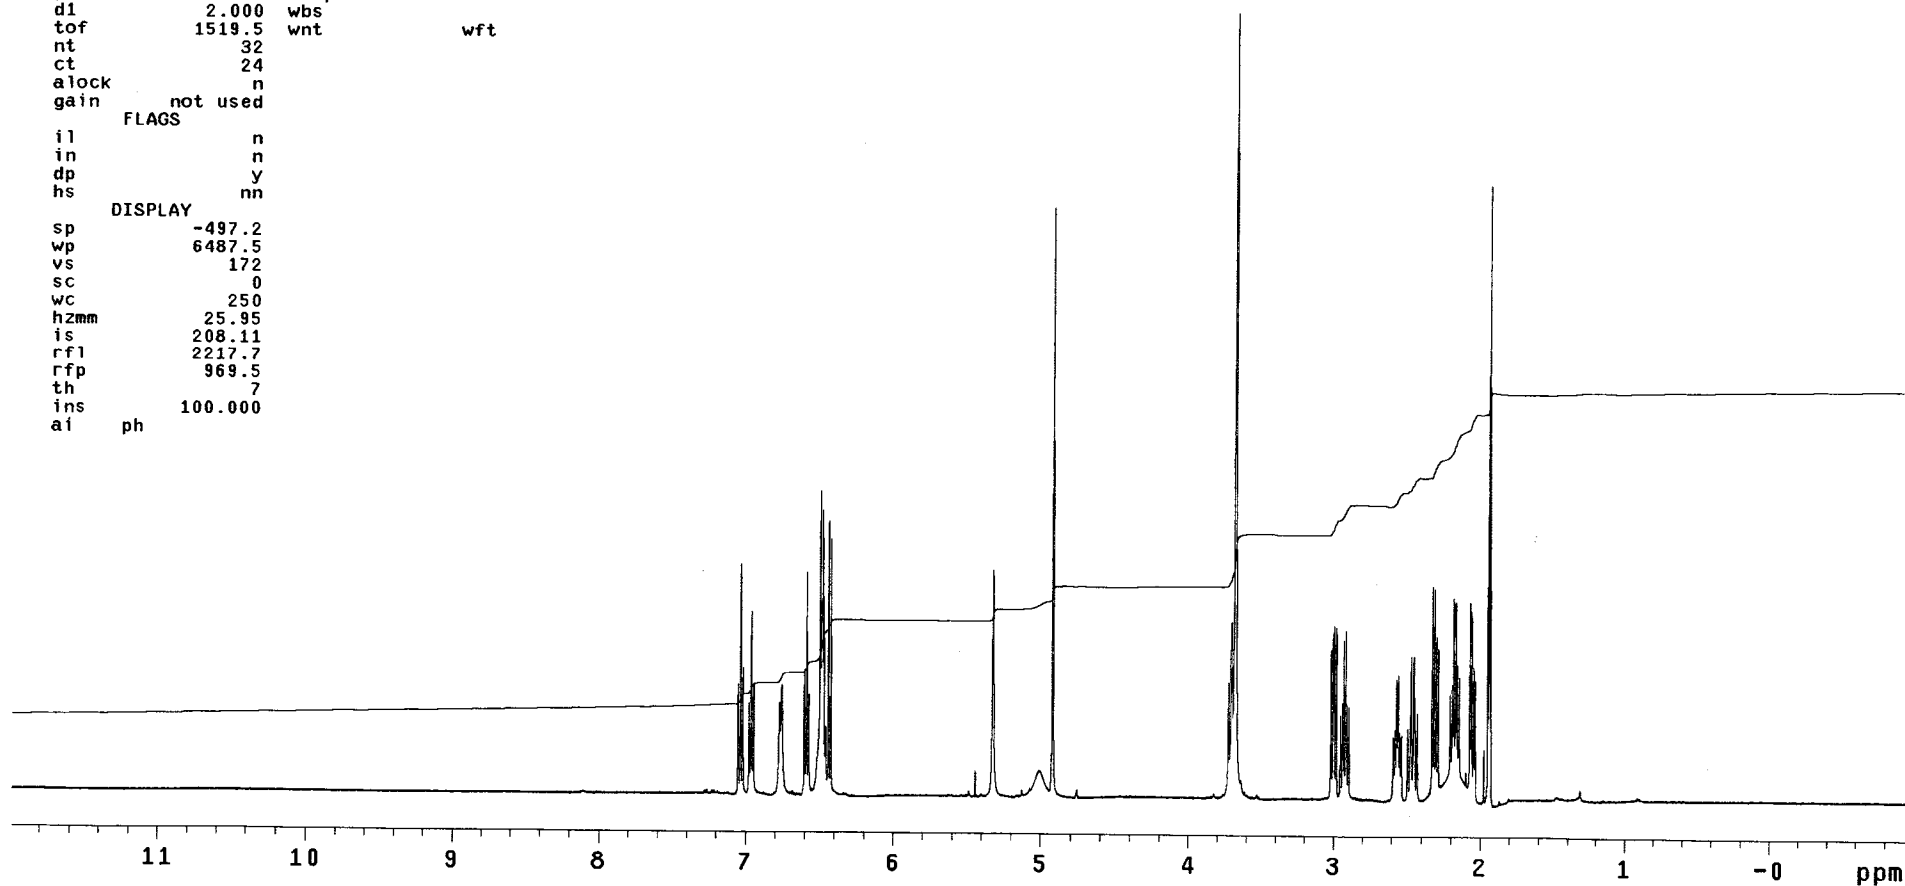

```
SAMPLE          DEC. & VT
solvent         CD3CN  dfrq      500.232
                  dn        H1
                  dpwr      38
                  dof      -500.0
                  dm        y
                  dmm       w
                  dmf      10700
                  dseq
                  dres      1.0
                  homo     n
                  temp     75.0
ACQUISITION
sfrq          125.795
tn            C13
at           1.736
np          131010
sw          37735.8
fb          not used
bs           32
ss           1
tpwr         59
pw           6.9
d1           0.763
tof          631.4
nt          30000
ct          24608
alock        n
gain         not used
          FLAGS
il            n
in            n
dp            y
hs            nn
          DISPLAY
sp          -2590.2
wp          30223.3
vs           749
sc           0
wc           250
hzmm        120.89
is           500.00
rf1         21008.2
rfp         14929.1
th           20
ins          1.000
ai          ph
```

PROCESSING

```
ib          0.30
wtfile
proc        ft
fn          131072
math        f
```

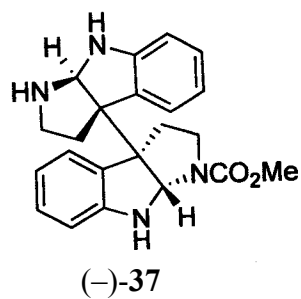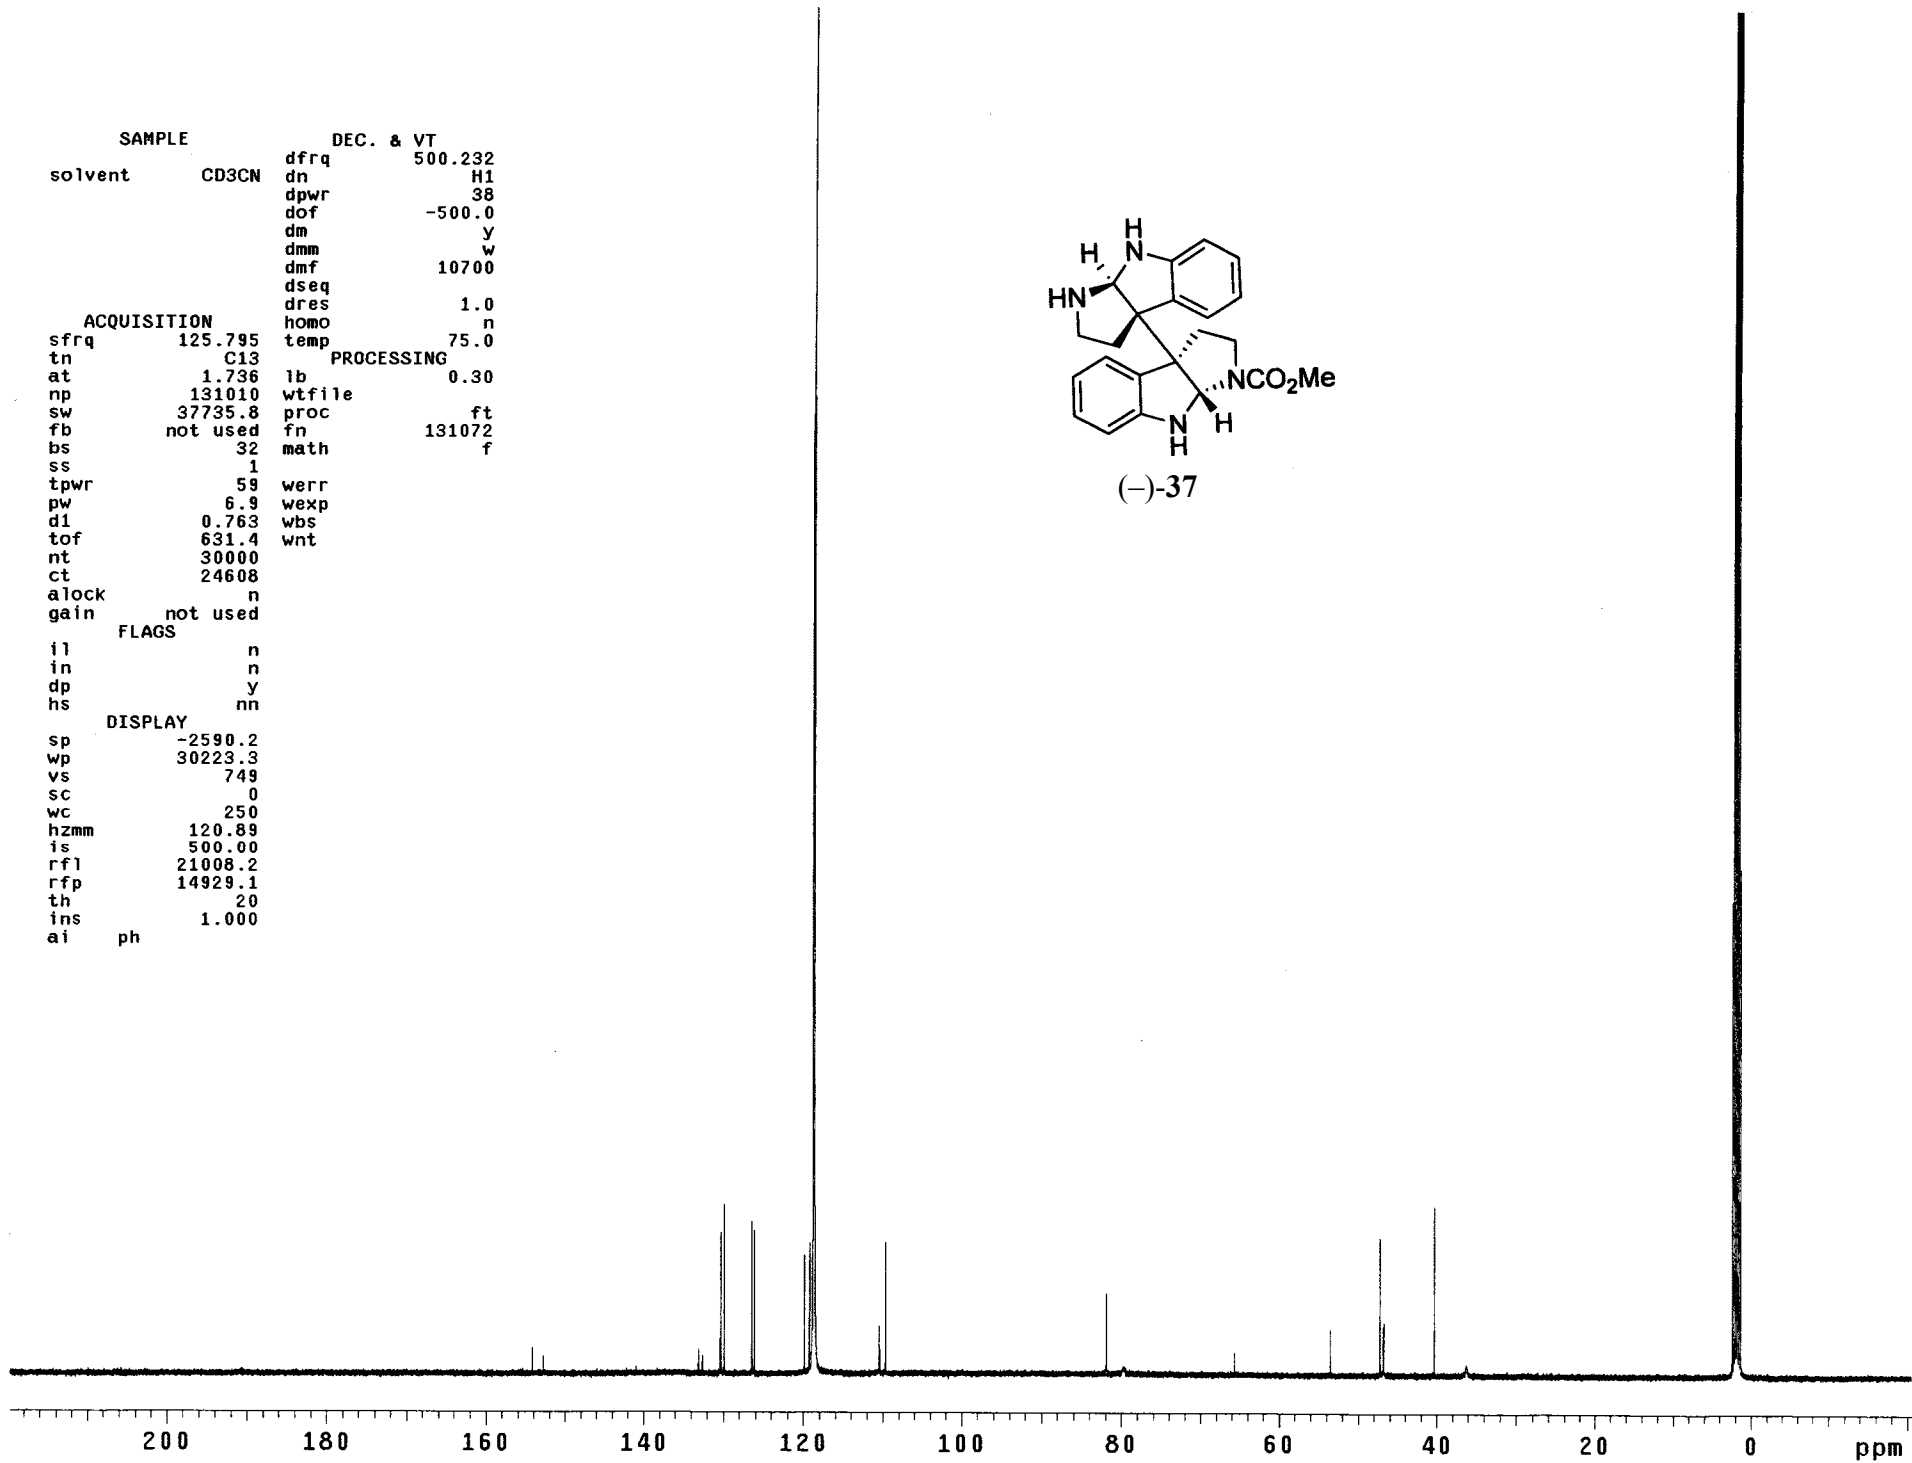

```
SAMPLE          DEC. & VT
solvent          CDC13  dfrq      125.672
                  dn        C13
                  dpwr      30
                  dof       0
                  dm        nnn
                  dmm       w
                  dmf       10000
                  dseq
                  dres      1.0
                  homo     n
                  temp     50.0

ACQUISITION     PROCESSING
sfrq           499.746  wtfile
tn             H1      proc
at            3.001    fn
np            63050    math
sw           10504.2
fb            not used
bs            4
tpwr         56
pw           8.6
d1           2.000
tof          1519.5
nt           16
ct           12
alock        n
gain         not used

FLAGS
il            n
in            n
dp            Y
hs            nn

DISPLAY
sp           -499.8
wp           6485.7
vs           29
sc            0
wc           250
hzmm         25.94
is           89.53
rfl          4865.4
rfp          3618.1
th            7
ins          100.000
ai           ph

werr
wexp
wbs
wnt          wft
```

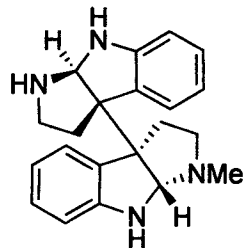

(-)-desmethyl-*meso*-chimonanthine (3)

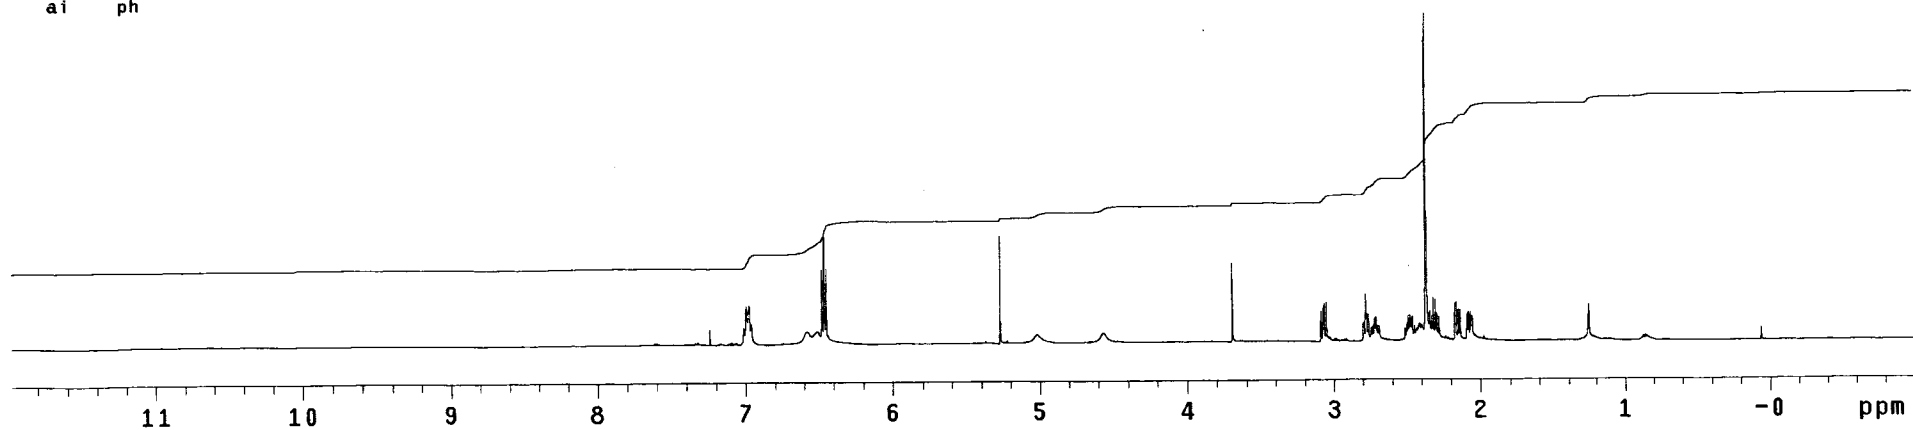

```
SAMPLE          DEC. & VT
solvent         CDC13  dfrq      500.229
                  dn        H1
                  dpwr      39
                  dof      -500.0
                  dm         y
                  dmm        w
                  dmf      10000
                  dseq
                  dres      1.0
                  homo      n
                  temp     50.0
ACQUISITION     PROCESSING
sfrq           125.795  lb        0.30
tn             C13     wtfile
at             1.736   proc
np            131010   fn        131072
sw            37735.8 math
fb            not used
bs             64      werr
ss             1       wexp
tpwr          58      wbs
pw             6.9     wnt
d1            0.763
tof           631.4
nt            20000
ct            16896
alock         n
gain          not used
                FLAGS
il             n
in             n
dp            y
hs            nn
DISPLAY
sp            -2551.6
wp            30199.7
vs            7875
sc             0
wc            250
hzmm         120.80
is            500.00
rfl          15990.6
rfp          9714.2
th            20
ins          1.000
ai           ph
```

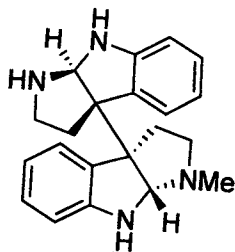

(-)-desmethyl-*meso*-chimonanthine (3)

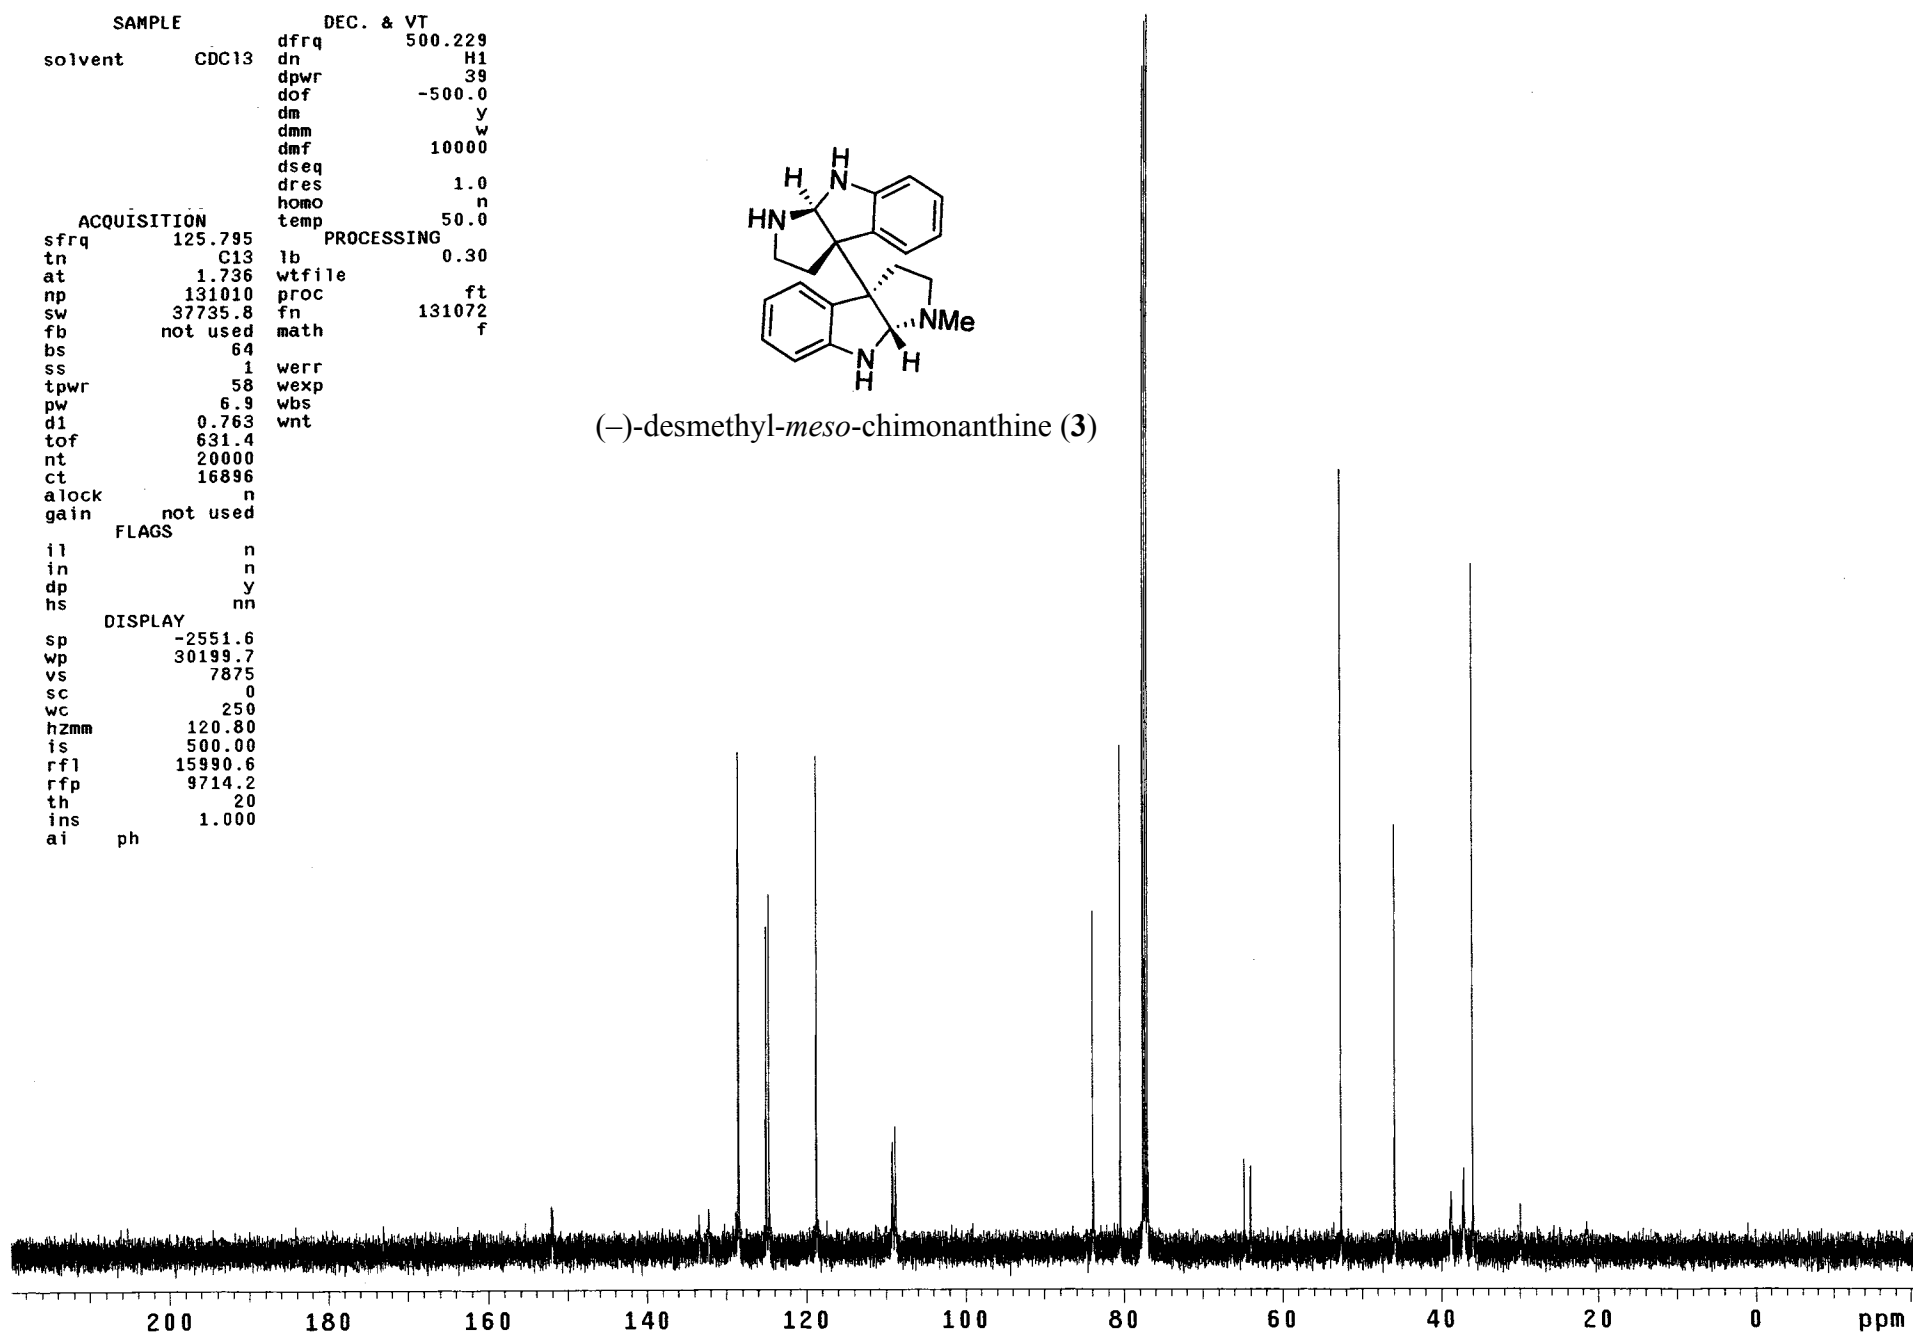

```
SAMPLE          DEC. & VT
solvent         DMSO    dfrq      125.673
                 dn      C13
                 dpwr     30
                 dof      0
                 dm       nnn
                 dmm      w
                 dmf     10000
                 dseq
                 dres     1.0
                 homo    n
                 temp    100.0

ACQUISITION
sfrq      499.748
tn        H1
at        3.001
np        63050
sw        10504.2
fb        not used
bs        8
tpwr      56
pw        8.6
d1        2.000
tof       1519.5
nt        32
ct        24
alock     n
gain      not used

PROCESSING
wtfile
proc      ft
fn        262144
math      f

werr
wexp
wbs
wnt       wft

FLAGS
il        n
in        n
dp        y
hs        nn

DISPLAY
sp        -497.9
wp        6493.7
vs        60
sc        0
wc        250
hzmm      25.97
is        107.81
rfl       2478.7
rfp       1249.4
th        7
ins       100.000
ai        ph
```

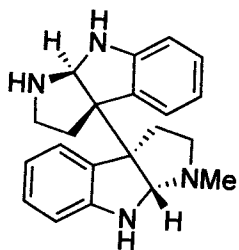

(-)-desmethyl-*meso*-chimonanthine (3)

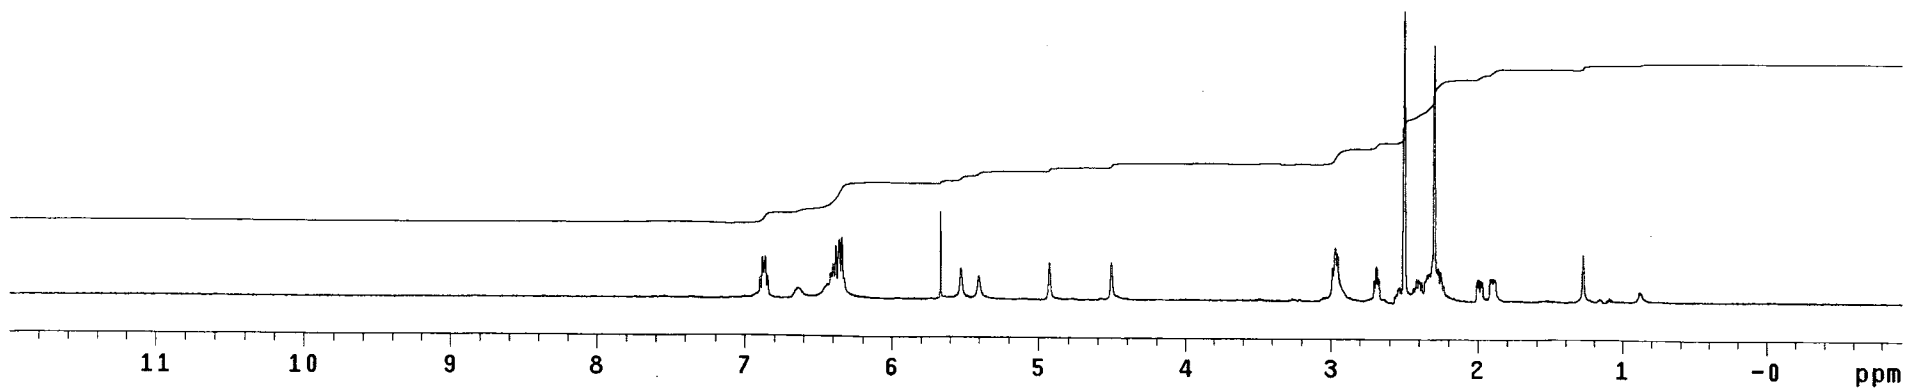



```
SAMPLE          DEC. & VT
solvent         DMSO  dfrq      500.232
                 dn      H1
                 dpwr     39
                 dof     -500.0
                 dm       y
                 dmm      w
                 dmf     10000
                 dseq
                 dres     1.0
                 homo    n
                 temp    100.0
ACQUISITION
sfrq           125.795  PROCESSING
tn             C13      lb      0.30
at            1.736    wtfile
np            131010   proc      ft
sw            37735.8  fn      131072
fb            not used math      f
bs            64
ss            1       werr
tpwr          58      wexp
pw            6.9     wbs
d1            0.763   wnt
tof           631.4
nt            25000
ct            17600
alock         n
gain          not used
FLAGS
il            n
in            n
dp            y
hs            nn
DISPLAY
sp            -2573.9
wp            30257.3
vs            10088
sc            0
wc            250
hzmm         121.03
is            500.00
rfl          11412.4
rfp          4969.7
th            20
ins          1.000
ai           ph
```

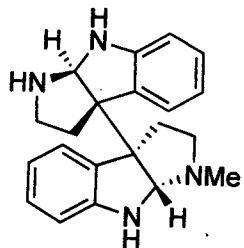

(-)-desmethyl-*meso*-chimonanthine (3)

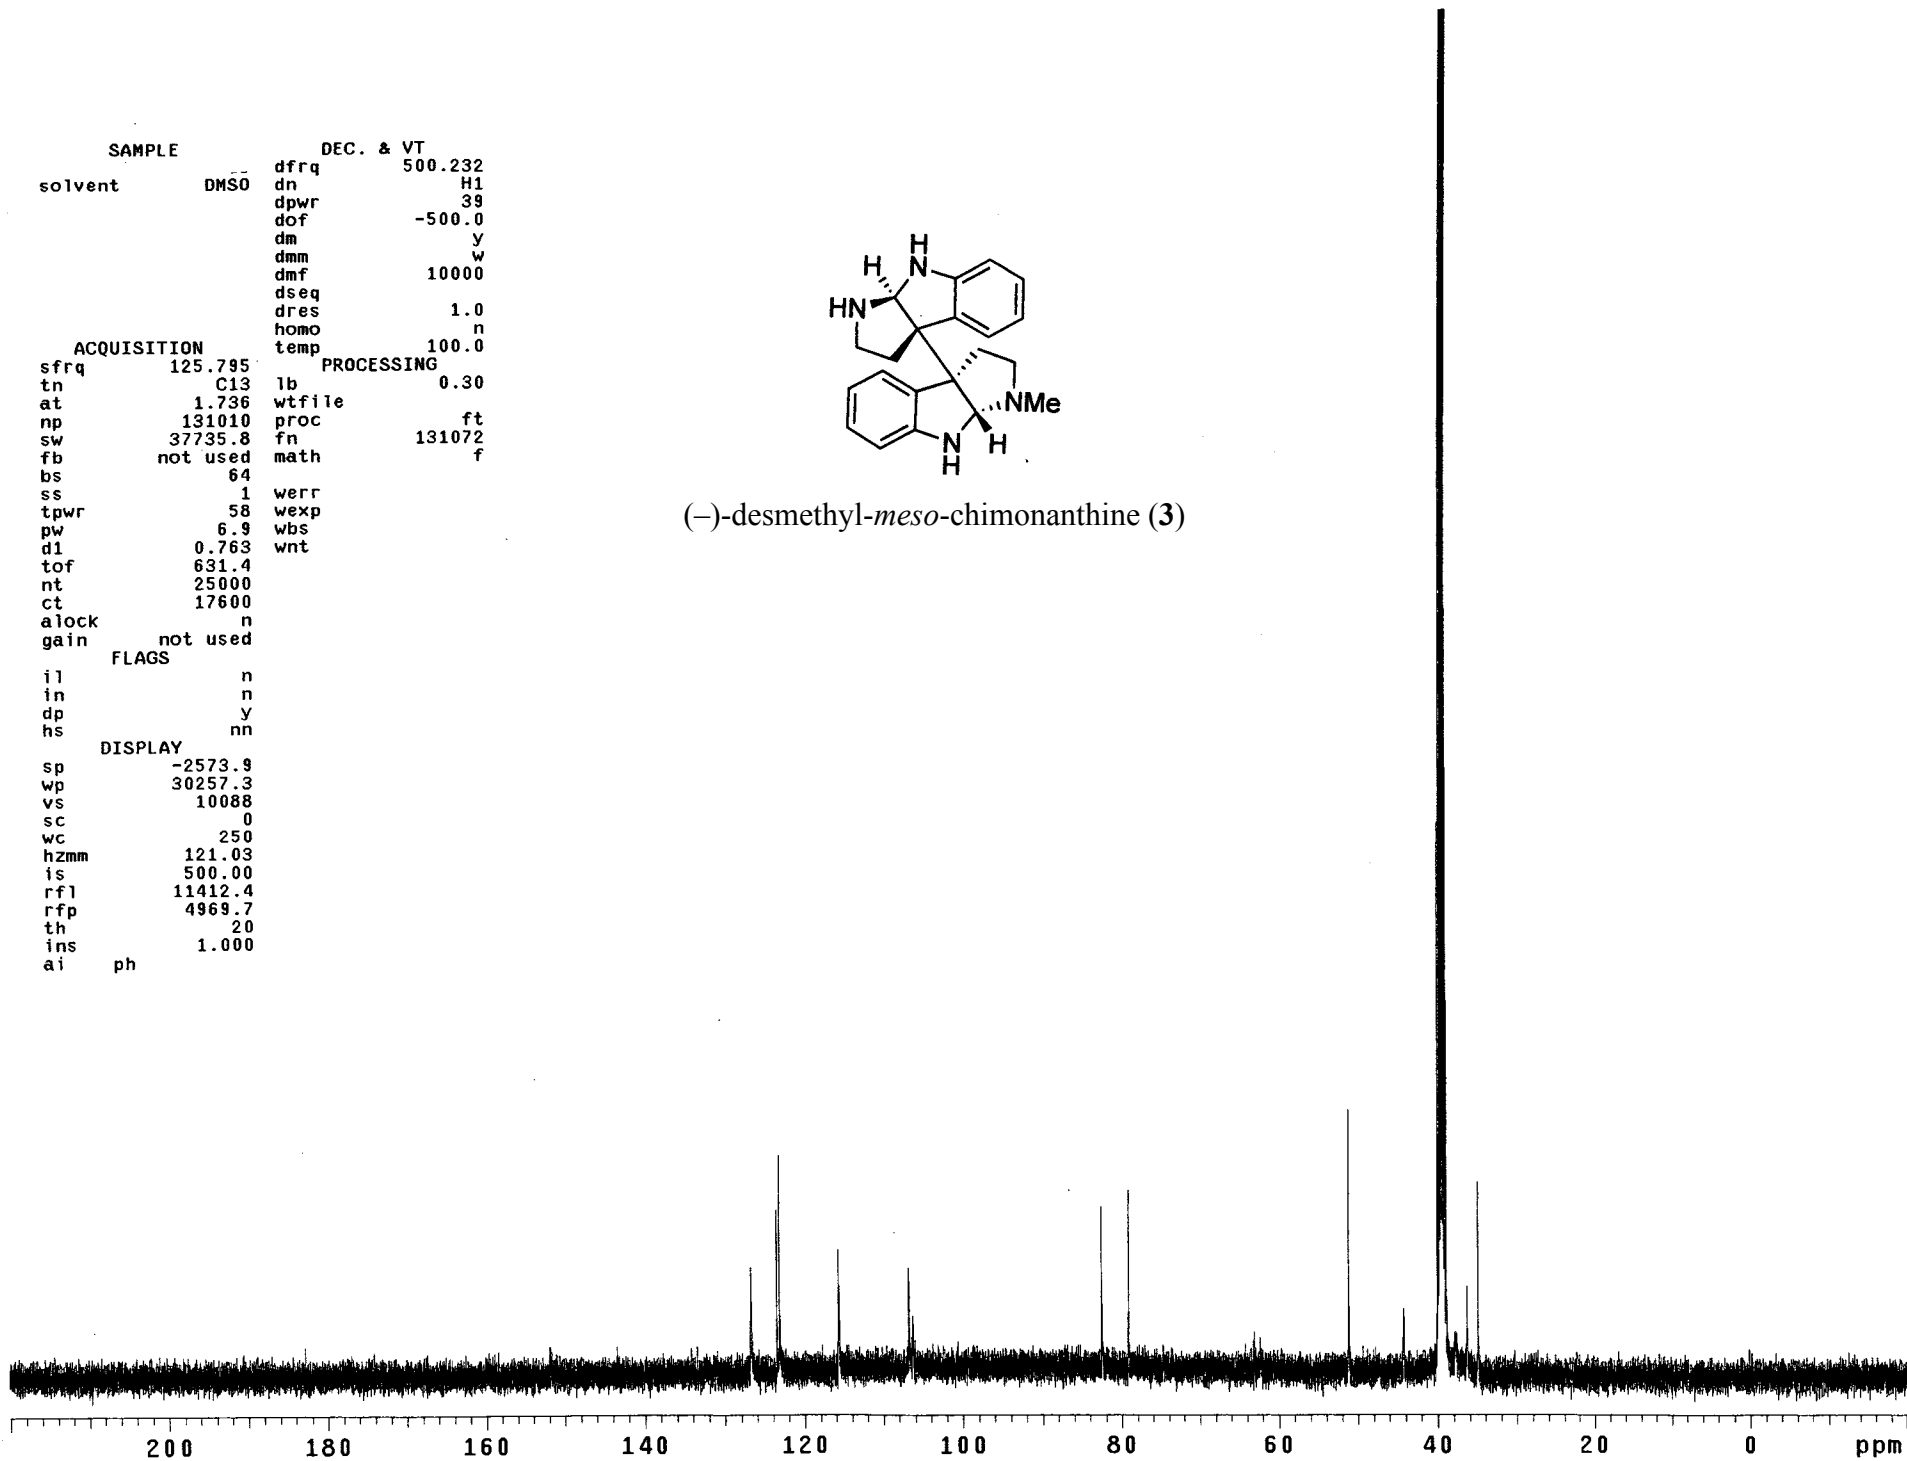

```
SAMPLE          DEC. & VT
solvent         CDC13  dfrq      125.794
                 dn        C13
                 dpwr      39
                 dof       0
                 dm        nnn
                 dmm       c
                 dmf       10000
                 dseq
                 dres      1.0
                 homo     n
                 temp     -40.0

ACQUISITION     PROCESSING
sfrq           500.231  wfile
tn             H1      proc
at             3.200   fn
np             64000   math
sw            10000.0  ft
fb            not used
bs             4      werr
ss            1      wexp
tpwr          60     wbs
pw            9.0    wnt
d1            1.800
tof           1498.2
nt            16
ct            16
alock         n
gain          not used

FLAGS
il            n
in            n
dp            y
hs            nn

DISPLAY
sp            -511.7
wp            6503.3
vs            307
sc            0
wc            250
hzmm         26.01
is            200.00
rfl          4630.7
rfp          3621.6
th            7
ins           1.000
ai           ph
```

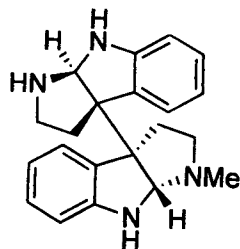

(-)-desmethyl-*meso*-chimonanthine (3)

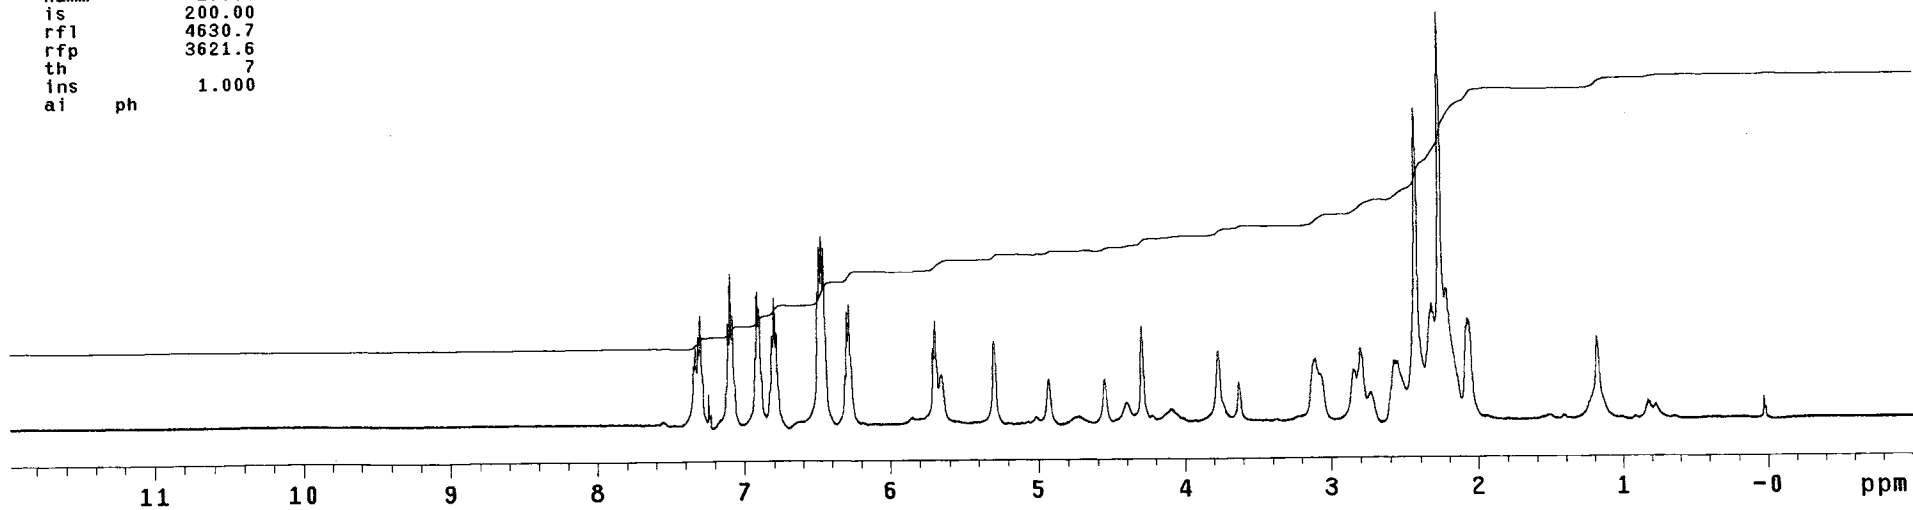

```
SAMPLE          DEC. & VT
solvent          CDC13  dfrq      500.229
                  dn        H1
                  dpwr      39
                  dof       -500.0
                  dm         y
                  dmm        w
                  dmf       10000
                  dseq
                  dres       1.0
                  homo      n
                  temp      -40.0
ACQUISITION
sfrq            125.795  lbf       0.30
tn              C13     wtfile
at              1.736   proc       ft
np             131010   fn       131072
sw             37735.8  math      f
fb            not used
bs              32     werr
ss              1     wexp
tpwr           58     wbs
pw             6.9    wnt
d1             0.763
tof           631.4
nt            15000
ct            4256
alock         not used
gain         not used
FLAGS
il            n
in            n
dp            Y
hs            nn
DISPLAY
sp           -2539.0
wp           30199.7
vs           2273
sc            0
wc            250
hzmm         120.80
is           500.00
rfl          16036.4
rfp          9714.9
th            20
ins          1.000
ai           ph
```

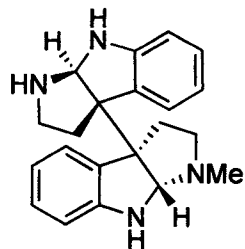

(-)-desmethyl-*meso*-chimonanthine (3)

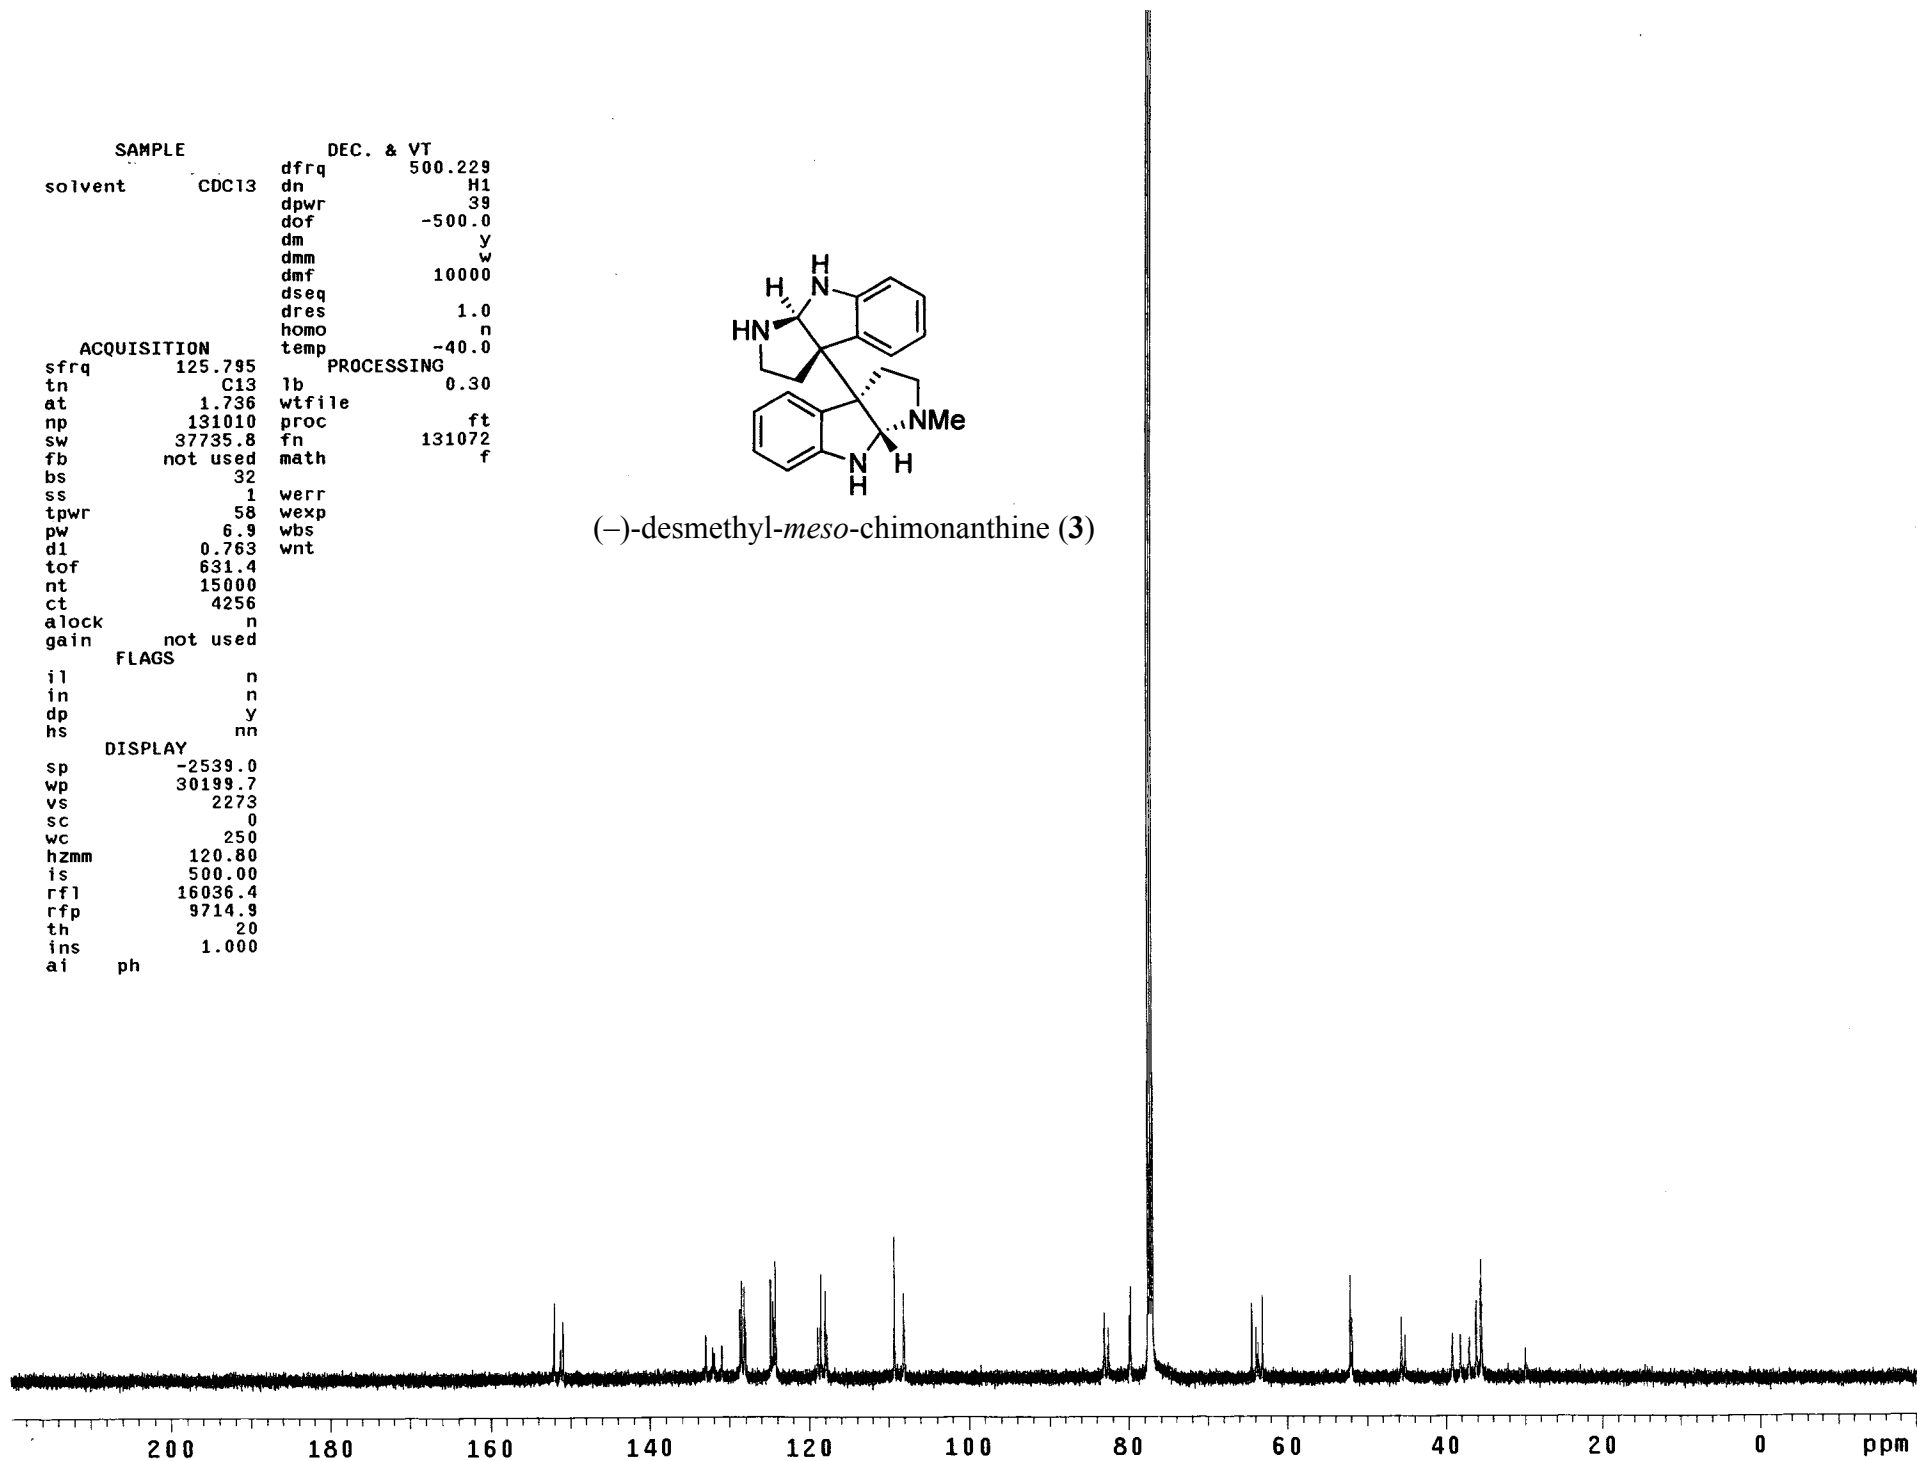

|             |          |            |         |
|-------------|----------|------------|---------|
| SAMPLE      |          | DEC. & VT  |         |
| solvent     | DMSO     | dfrq       | 125.673 |
|             |          | dn         | C13     |
|             |          | dpwr       | 30      |
|             |          | dof        | 0       |
|             |          | dm         | nnn     |
|             |          | dmm        | w       |
|             |          | dmf        | 10000   |
|             |          | dseq       |         |
|             |          | dres       | 1.0     |
|             |          | homo       | n       |
|             |          | temp       | 80.0    |
| ACQUISITION |          | PROCESSING |         |
| sfrq        | 499.748  | wtfile     |         |
| tn          | H1       | proc       | ft      |
| at          | 3.001    | fn         | 262144  |
| np          | 63050    | math       | f       |
| sw          | 10504.2  |            |         |
| fb          | not used |            |         |
| bs          | 4        |            |         |
| tpwr        | 56       | werr       |         |
| pw          | 8.6      | wexp       |         |
| d1          | 2.000    | wbs        |         |
| tof         | 1519.5   | wnt        | wft     |
| nt          | 32       |            |         |
| ct          | 24       |            |         |
| alock       | n        |            |         |
| gain        | not used |            |         |
| FLAGS       |          |            |         |
| il          | n        |            |         |
| in          | n        |            |         |
| dp          | y        |            |         |
| hs          | nn       |            |         |
| DISPLAY     |          |            |         |
| sp          | -515.7   |            |         |
| wp          | 6508.8   |            |         |
| vs          | 66       |            |         |
| sc          | 0        |            |         |
| wc          | 250      |            |         |
| hzmm        | 26.04    |            |         |
| is          | 254.60   |            |         |
| rfl         | 2477.9   |            |         |
| rfp         | 1249.4   |            |         |
| th          | 7        |            |         |
| ins         | 100.000  |            |         |
| al          | ph       |            |         |

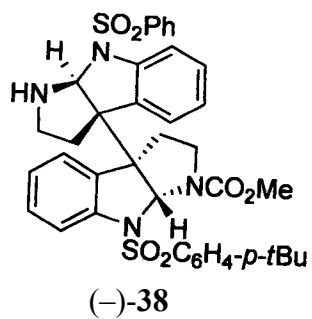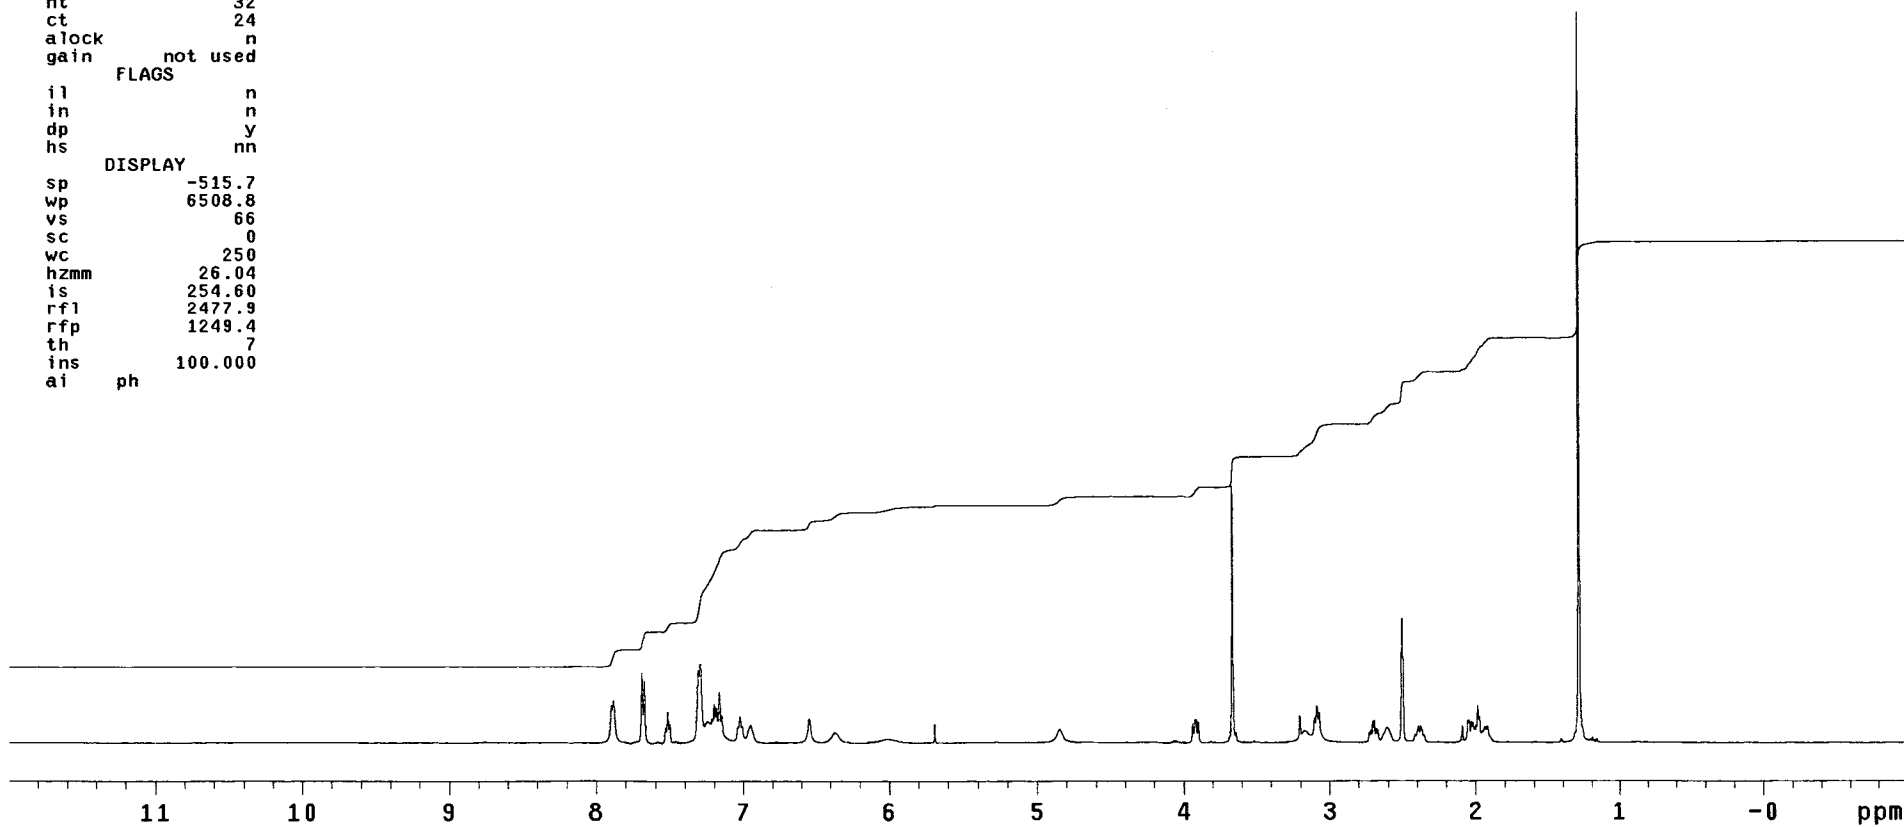

|             |          |            |         |
|-------------|----------|------------|---------|
| SAMPLE      |          | DEC. & VT  |         |
| solvent     | DMSO     | dfrq       | 500.232 |
|             |          | dn         | H1      |
|             |          | dpwr       | 39      |
|             |          | dof        | -500.0  |
|             |          | dm         | y       |
|             |          | dmm        | w       |
|             |          | dmf        | 10000   |
|             |          | dseq       |         |
|             |          | dres       | 1.0     |
|             |          | homo       | n       |
|             |          | temp       | 80.0    |
| ACQUISITION |          | PROCESSING |         |
| sfrq        | 125.795  | lb         | 0.30    |
| tn          | C13      | wtfile     |         |
| at          | 1.736    | proc       | ft      |
| np          | 131010   | fn         | 131072  |
| sw          | 37735.8  | math       | f       |
| fb          | not used |            |         |
| bs          | 64       |            |         |
| ss          | 1        |            |         |
| tpwr        | 58       | werr       |         |
| pw          | 6.9      | wexp       |         |
| d1          | 0.763    | wbs        |         |
| tof         | 631.4    | wnt        |         |
| nt          | 25000    |            |         |
| ct          | 16448    |            |         |
| alock       | n        |            |         |
| gain        | not used |            |         |
| FLAGS       |          |            |         |
| il          | n        |            |         |
| in          | n        |            |         |
| dp          | y        |            |         |
| hs          | nn       |            |         |
| DISPLAY     |          |            |         |
| sp          | -2554.9  |            |         |
| wp          | 30221.6  |            |         |
| vs          | 2340     |            |         |
| sc          | 0        |            |         |
| wc          | 250      |            |         |
| hzmm        | 120.89   |            |         |
| is          | 500.00   |            |         |
| rfl         | 11399.8  |            |         |
| rfp         | 4969.7   |            |         |
| th          | 20       |            |         |
| ins         | 1.000    |            |         |
| ai          | ph       |            |         |

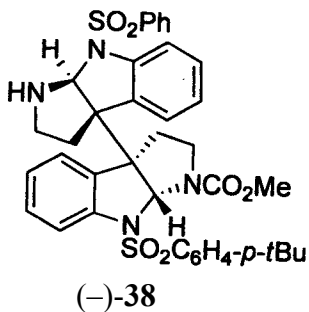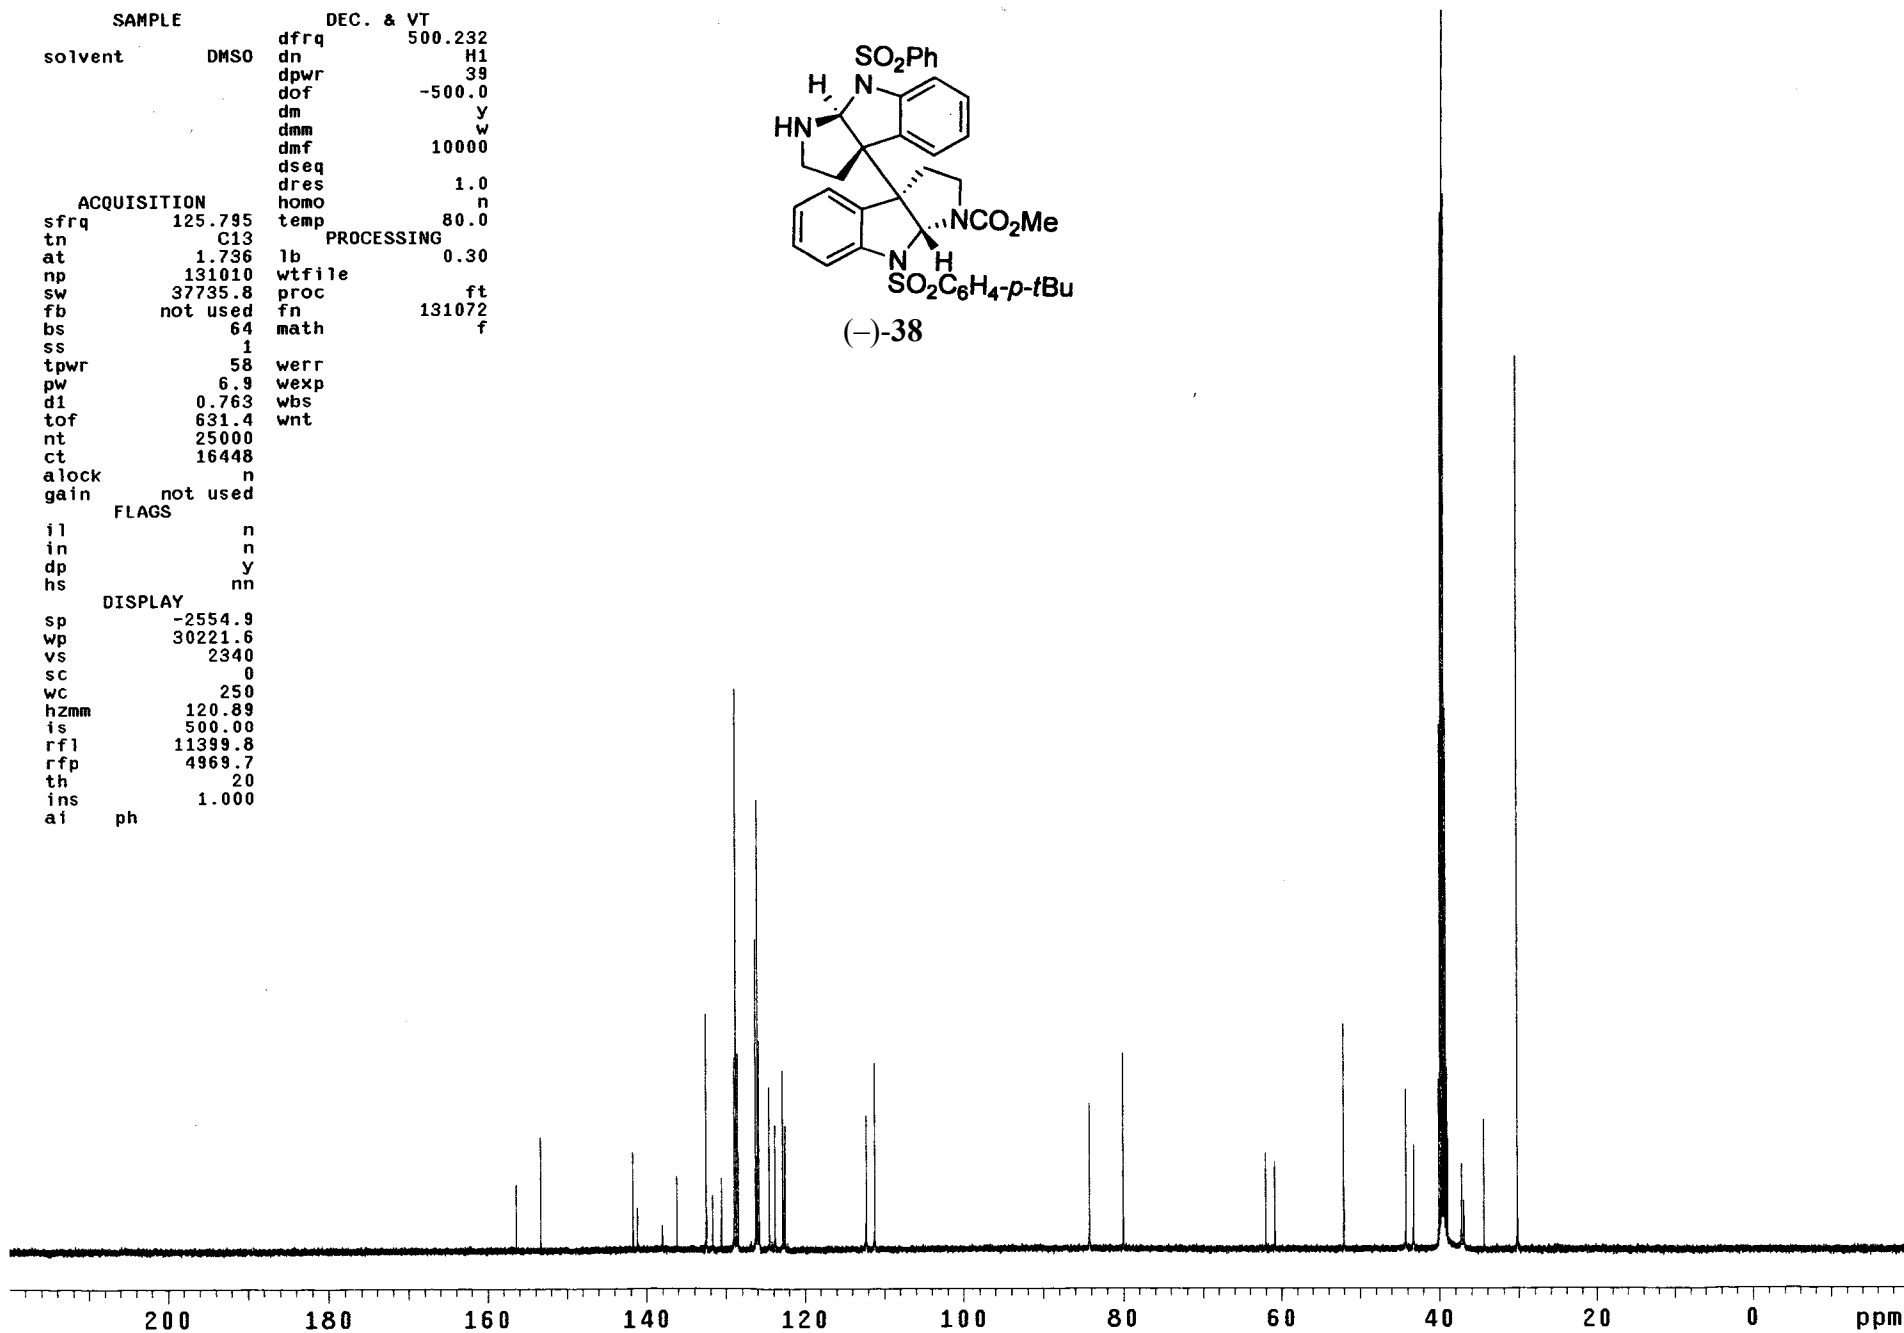

|             |          |            |         |
|-------------|----------|------------|---------|
| SAMPLE      |          | DEC. & VT  |         |
| solvent     | CD3CN    | dfrq       | 125.673 |
|             |          | dn         | C13     |
|             |          | dpwr       | 30      |
|             |          | dof        | 0       |
|             |          | dm         | nnn     |
|             |          | dmm        | w       |
|             |          | dmf        | 10000   |
|             |          | dseq       |         |
|             |          | dres       | 1.0     |
|             |          | homo       | n       |
|             |          | temp       | 70.0    |
| ACQUISITION |          | PROCESSING |         |
| sfrq        | 499.748  | wtfile     |         |
| tn          | H1       | proc       | ft      |
| at          | 3.001    | fn         | 262144  |
| np          | 63050    | math       | f       |
| sw          | 10504.2  |            |         |
| fb          | not used |            |         |
| bs          | 8        | werr       |         |
| tpwr        | 56       | wexp       |         |
| pw          | 8.6      | wbs        |         |
| d1          | 2.000    | wnt        | wft     |
| tof         | 1519.5   |            |         |
| nt          | 32       |            |         |
| ct          | 32       |            |         |
| alock       | n        |            |         |
| gain        | not used |            |         |
| FLAGS       |          |            |         |
| il          | n        |            |         |
| in          | n        |            |         |
| dp          | y        |            |         |
| hs          | nn       |            |         |
| DISPLAY     |          |            |         |
| sp          | -497.6   |            |         |
| wp          | 6490.0   |            |         |
| vs          | 24       |            |         |
| sc          | 0        |            |         |
| wc          | 250      |            |         |
| hzmm        | 25.96    |            |         |
| is          | 151.08   |            |         |
| rfl         | 2217.4   |            |         |
| rfp         | 969.5    |            |         |
| th          | 7        |            |         |
| ins         | 100.000  |            |         |
| ai          | ph       |            |         |

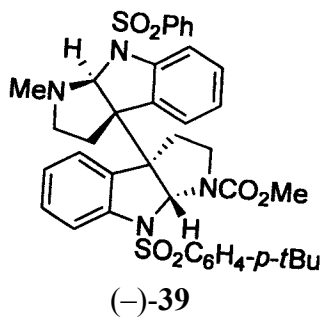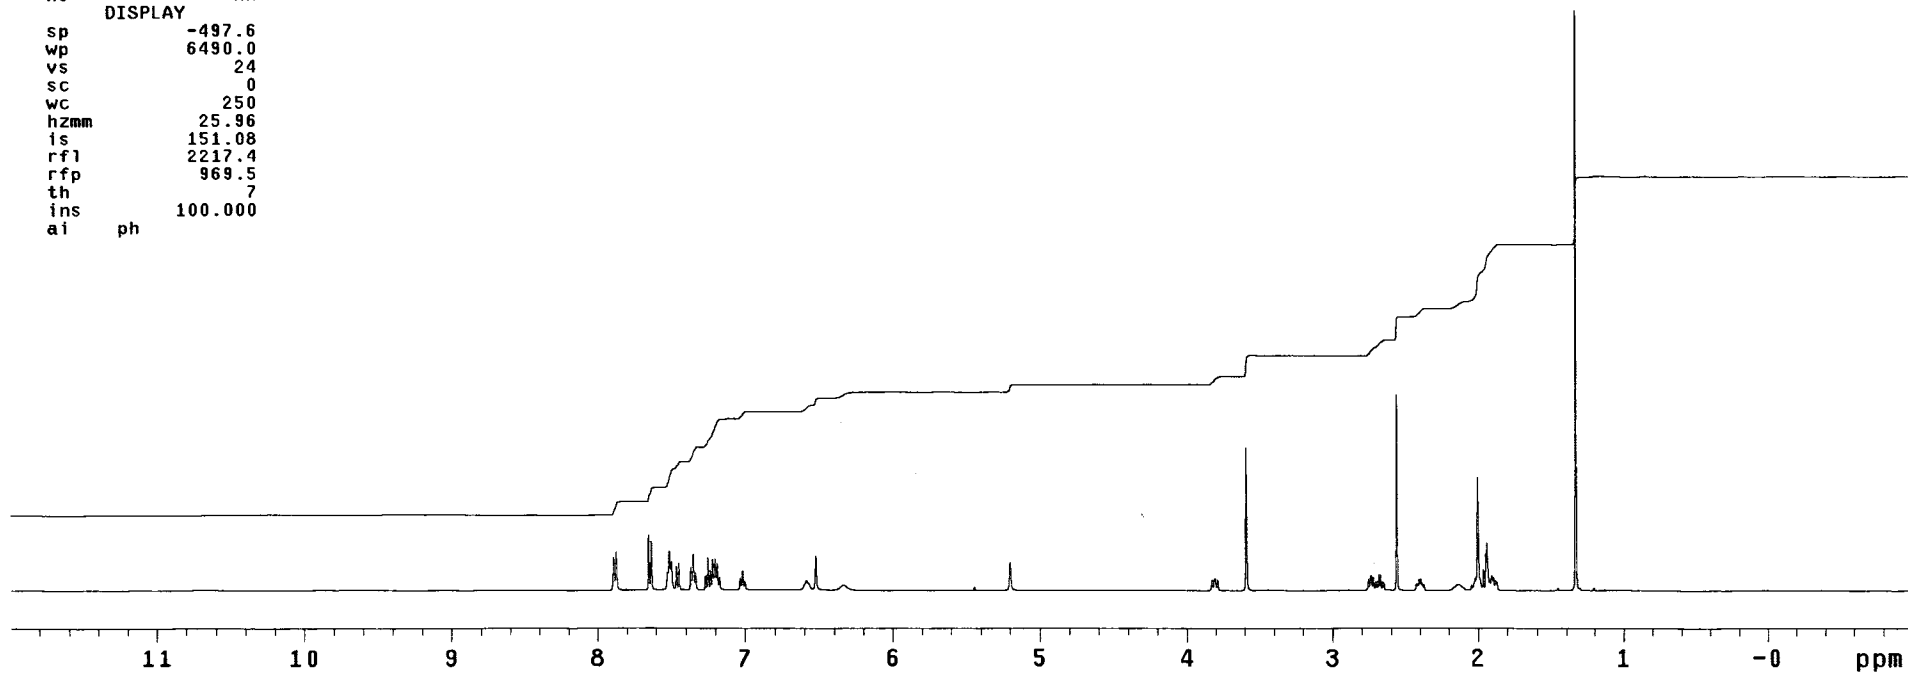

|             |          |            |         |
|-------------|----------|------------|---------|
| SAMPLE      |          | DEC. & VT  |         |
| solvent     | CD3CN    | dfrq       | 500.232 |
|             |          | dn         | H1      |
|             |          | dpwr       | 39      |
|             |          | dof        | -500.0  |
|             |          | dm         | y       |
|             |          | dmm        | w       |
|             |          | dmf        | 10000   |
|             |          | dseq       |         |
|             |          | dres       | 1.0     |
|             |          | homo       | n       |
|             |          | temp       | 70.0    |
| ACQUISITION |          | PROCESSING |         |
| sfrq        | 125.795  | lb         | 0.30    |
| tn          | C13      | wtfile     |         |
| at          | 1.736    | proc       | ft      |
| np          | 131010   | fn         | 131072  |
| sw          | 37735.8  | math       | f       |
| fb          | not used | werr       |         |
| bs          | 64       | wexp       |         |
| ss          | 1        | wbs        |         |
| tpwr        | 58       | wnt        |         |
| pw          | 6.9      |            |         |
| d1          | 0.763    |            |         |
| tof         | 631.4    |            |         |
| nt          | 25000    |            |         |
| ct          | 18816    |            |         |
| alock       | n        |            |         |
| gain        | not used |            |         |
| FLAGS       |          |            |         |
| il          | n        |            |         |
| in          | n        |            |         |
| dp          | y        |            |         |
| hs          | nn       |            |         |
| DISPLAY     |          |            |         |
| sp          | -2510.8  |            |         |
| wp          | 30188.2  |            |         |
| vs          | 755      |            |         |
| sc          | 0        |            |         |
| wc          | 250      |            |         |
| hzmm        | 120.75   |            |         |
| is          | 500.00   |            |         |
| rfl         | 21011.6  |            |         |
| rfp         | 14929.1  |            |         |
| th          | 20       |            |         |
| ins         | 1.000    |            |         |
| ai          | ph       |            |         |

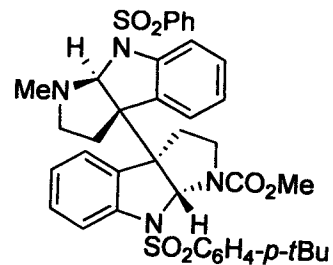

(-)-39

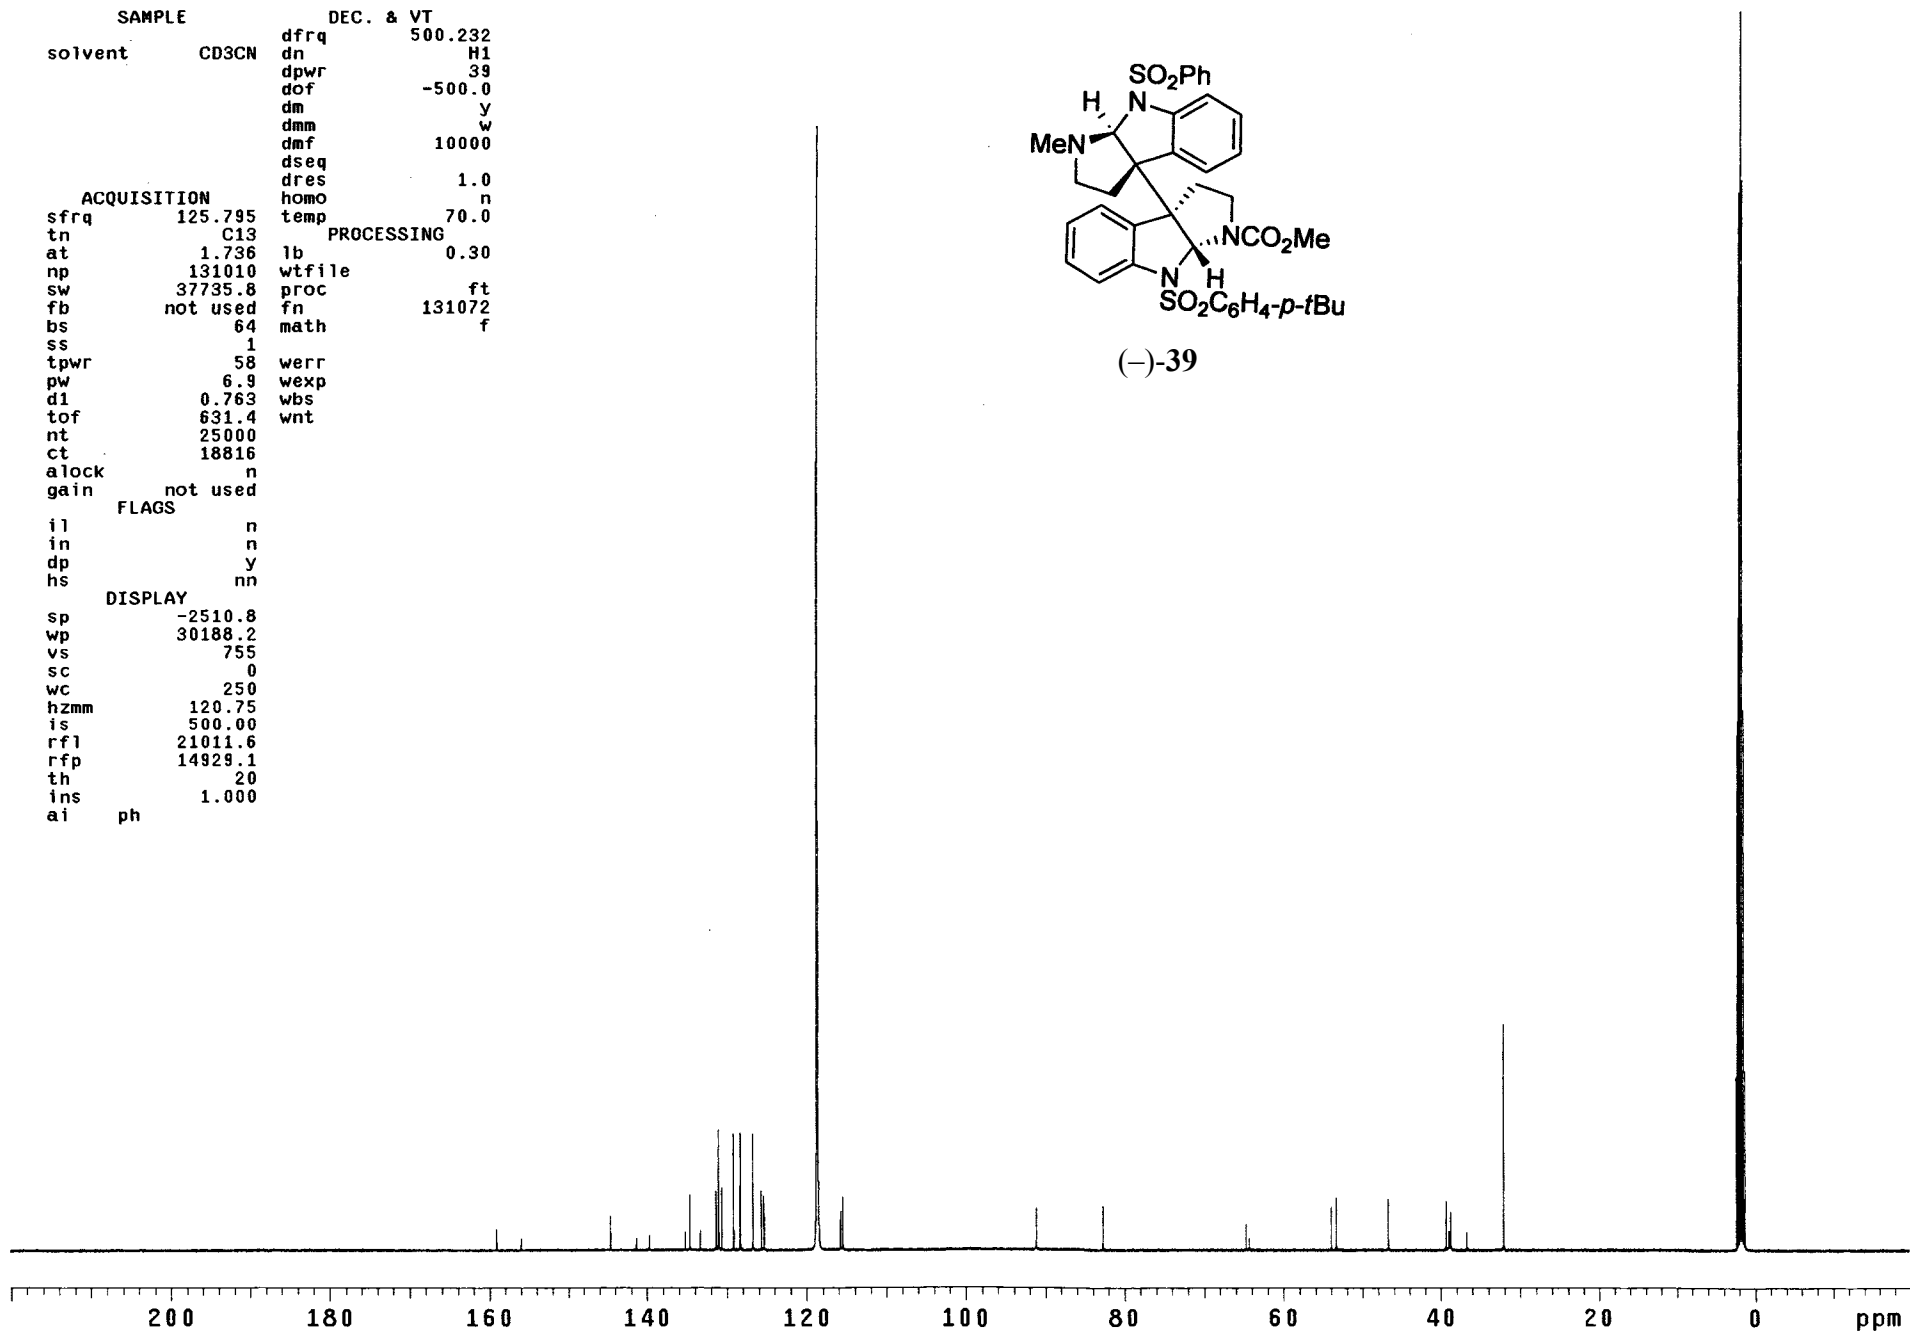

|             |          |            |         |
|-------------|----------|------------|---------|
| SAMPLE      |          | DEC. & VT  |         |
| solvent     | CD3CN    | dfrq       | 125.673 |
|             |          | dn         | C13     |
|             |          | dpwr       | 30      |
|             |          | dof        | 0       |
|             |          | dm         | nnn     |
|             |          | dmm        | w       |
|             |          | dmf        | 10000   |
|             |          | dseq       |         |
|             |          | dres       | 1.0     |
|             |          | homo       | n       |
|             |          | temp       | 75.0    |
| ACQUISITION |          | PROCESSING |         |
| sfrq        | 499.748  | wtfile     | ft      |
| tn          | H1       | proc       | 262144  |
| at          | 3.001    | fn         | f       |
| np          | 63050    | math       |         |
| sw          | 10504.2  |            |         |
| fb          | not used |            |         |
| bs          | 4        | werr       |         |
| tpwr        | 56       | wexp       |         |
| pw          | 8.6      | wbs        |         |
| d1          | 2.000    | wnt        | wft     |
| tof         | 1519.5   |            |         |
| nt          | 16       |            |         |
| ct          | 16       |            |         |
| alock       | n        |            |         |
| gain        | not used |            |         |
| FLAGS       |          |            |         |
| il          | n        |            |         |
| in          | n        |            |         |
| dp          | y        |            |         |
| hs          | nn       |            |         |
| DISPLAY     |          |            |         |
| sp          | -508.0   |            |         |
| wp          | 6508.8   |            |         |
| vs          | 23       |            |         |
| sc          | 0        |            |         |
| wc          | 250      |            |         |
| hzmm        | 26.04    |            |         |
| is          | 72.74    |            |         |
| rfl         | 2218.5   |            |         |
| rfp         | 969.5    |            |         |
| th          | 7        |            |         |
| ins         | 100.000  |            |         |
| ai          | ph       |            |         |

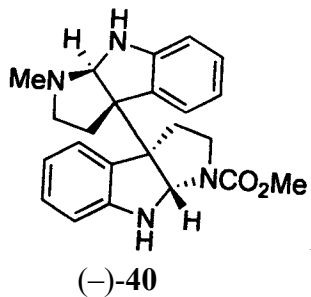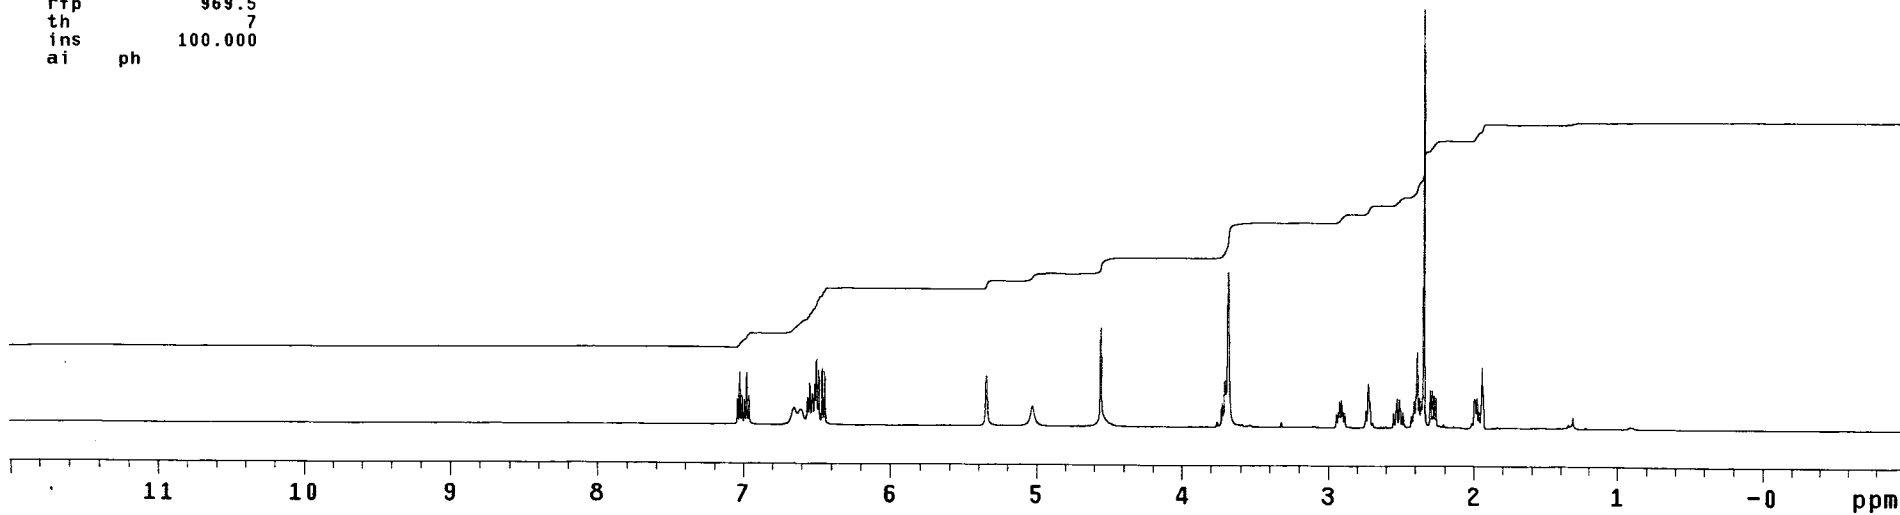



```
SAMPLE          DEC. & VT
solvent          CD3CN      dfrq      500.232
                  dn         H1
                  dpwr       39
                  dof        -500.0
                  dm         y
                  dmm        w
                  dmf        10000
                  dseq
                  dres       1.0
                  homo      n
                  temp      75.0
ACQUISITION
sfrq            125.795
tn              C13
at              1.736
np             131010
sw             37735.8
fb            not used
bs              64
ss              1
tpwr           58
pw             6.9
d1             0.763
tof           631.4
nt            20000
ct            14912
alock          n
gain          not used
                FLAGS
il             n
in             n
dp            y
hs            nn
                DISPLAY
sp            -2585.1
wp            30271.7
vs            1018
sc            0
wc            250
hzmm         121.09
is            500.00
rfl          21003.6
rfp          14929.1
th           20
ins          1.000
ai           ph
```

PROCESSING

werr  
wexp  
wbs  
wnt

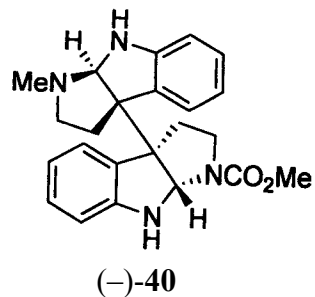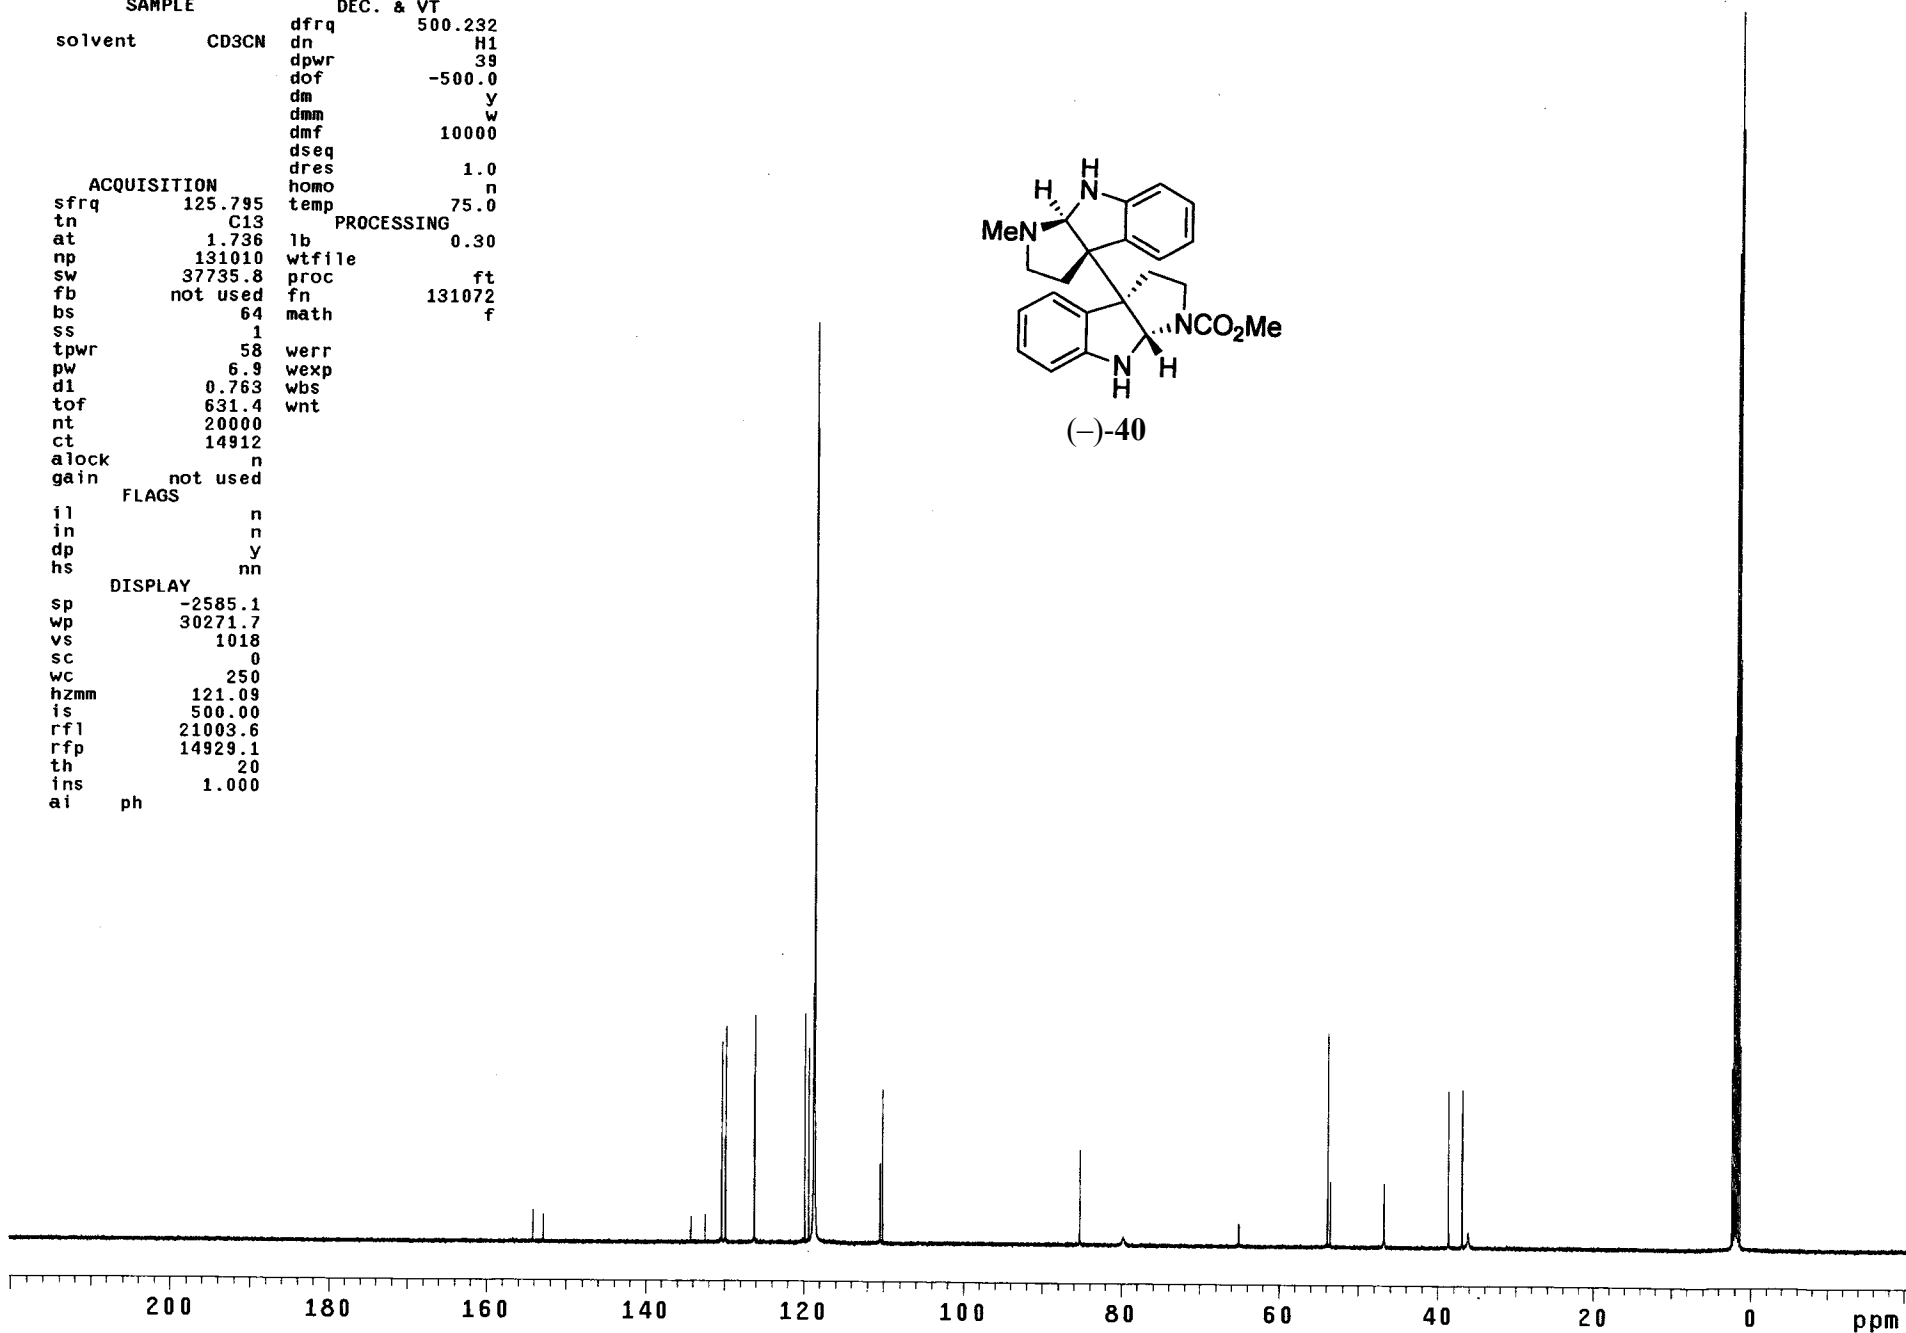

Supplement: NIHMS535763-supplement-ESI.pdf [file NIHMS535763-supplement-ESI.pdf]
